# Supplementary material for: How much evidence is there that political factors are related to population health outcomes? An internationally comparative systematic review
Source: PubMed Central journal article supplement — BMJ Open. 2018 Oct 18;8(10):e020886. doi: 10.1136/bmjopen-2017-020886 (PMC6196855; doi:10.1136/bmjopen-2017-020886), 2018-10-18
Supplement: bmjopen-2017-020886.draft_revisions.pdf [file bmjopen-2017-020886.draft_revisions.pdf]

# BMJ Open

BMJ Open is committed to open peer review. As part of this commitment we make the peer review history of every article we publish publicly available.

When an article is published we post the peer reviewers' comments and the authors' responses online. We also post the versions of the paper that were used during peer review. These are the versions that the peer review comments apply to.

The versions of the paper that follow are the versions that were submitted during the peer review process. They are not the versions of record or the final published versions. They should not be cited or distributed as the published version of this manuscript.

BMJ Open is an open access journal and the full, final, typeset and author-corrected version of record of the manuscript is available on our site with no access controls, subscription charges or pay-per-view fees (<http://bmjopen.bmj.com>).

If you have any questions on BMJ Open's open peer review process please email [info.bmjopen@bmj.com](mailto:info.bmjopen@bmj.com)

# BMJ Open

## How much evidence is there that political factors are related to population health outcomes? An internationally comparative systematic review

|                                 |                                                                                                                                                                                                                                                         |
|---------------------------------|---------------------------------------------------------------------------------------------------------------------------------------------------------------------------------------------------------------------------------------------------------|
| Journal:                        | <i>BMJ Open</i>                                                                                                                                                                                                                                         |
| Manuscript ID                   | bmjopen-2017-020886                                                                                                                                                                                                                                     |
| Article Type:                   | Research                                                                                                                                                                                                                                                |
| Date Submitted by the Author:   | 29-Nov-2017                                                                                                                                                                                                                                             |
| Complete List of Authors:       | Barnish, Max; University of Exeter, Exeter Medical School<br>Tørnes, Michelle; University of Aberdeen Institute of Applied Health Sciences, Ageing Clinical and Experimental Research (ACER)<br>Horne, Becky ; Independent scholar, Independent scholar |
| <b>Primary Subject Heading</b>: | Health policy                                                                                                                                                                                                                                           |
| Secondary Subject Heading:      | Public health                                                                                                                                                                                                                                           |
| Keywords:                       | PUBLIC HEALTH, Health policy < HEALTH SERVICES ADMINISTRATION & MANAGEMENT, Political determinants of health, SOCIAL MEDICINE                                                                                                                           |
|                                 |                                                                                                                                                                                                                                                         |

SCHOLARONE™  
Manuscripts

1

2  
3 **How much evidence is there that political factors are related to population health**  
4 **outcomes? An internationally comparative systematic review**

5 Max Barnish,<sup>1</sup> Michelle Tørnes,<sup>2</sup> and Becky Horne<sup>3</sup>

6  
7 1 = Institute of Health Research, Exeter Medical School, University of Exeter, Exeter, UK

8  
9 2 = Ageing Clinical and Experimental Research (ACER), School of Medicine, Medical  
10 Sciences and Nutrition, University of Aberdeen, Aberdeen, UK

11  
12 3 = Independent Scholar, London, UK

13 Correspondence to: m.s.barnish@exeter.ac.uk (Dr M. Barnish)

14  
15  
16  
17  
18  
19  
20  
21  
22  
23  
24  
25  
26  
27  
28  
29  
30  
31  
32  
33  
34  
35  
36  
37  
38  
39  
40  
41  
42  
43  
44  
45  
46  
47  
48  
49  
50  
51  
52  
53  
54  
55  
56  
57  
58  
59  
60

For peer review only

2

**ABSTRACT**

**Objectives:** To provide a seven-year update of the most recent systematic review about the relationships between political features and population health outcomes.

**Setting:** Internationally comparative scholarly literature.

**Data sources:** Ten scholarly bibliographic databases plus supplementary searches in bibliographies and Google Scholar were used to update a previous systematic review

**Primary and secondary outcome measures:** Any population health outcome measure, apart from healthcare spending.

**Results:** 73 unique publications were identified from the previous systematic review. The database searches to update the literature identified 45,356 raw records with 35,207 remaining following deduplication. 55 publications were identified from supplementary searches. In total, 258 publications proceeded to full-text review and 176 were included in narrative synthesis. Eighty-five studies were assessed at low risk of bias, 89 at moderate risk of bias and none at high risk of bias. Assessment could not be conducted for 2 studies with only book chapters. No meta-analysis was conducted. 102 studies assessed welfare state generosity and 79 found a positive association. 17 studies assessed political tradition and 15 found a positive association with left-of-centre tradition. 44 studies assessed democracy and 34 found a positive association. 28 studies assessed globalisation and 14 found a negative association, while 7 were positive and 7 inconclusive.

**Conclusions:** This review concludes that welfare state generosity, left-of-centre democratic political tradition and democracy are largely positively associated with population health. Globalisation may be negatively associated with population health, but the results are less conclusive. The consistency of evidence, large time windows for many studies, and strong ideological plausibility support causal inference. It is important for the academic public health community to engage with politics in its research as well as in advocacy and stakeholder engagement, in order to facilitate positive outcomes for population health.

**Strengths and limitations of this study**

- We offer the largest systematic review on the political determinants of population health.
- The use of a systematic review design offers a robust and reproducible method that minimises potential reviewer bias.
- Our review also involved searching ten major scholarly databases in addition to relevant supplementary searches.
- The internationally comparative approach ensures relevance to readers worldwide.
- Resources meant it was unfeasible to conduct a new review from inception rather than an update of a 2010 review.

## INTRODUCTION

### *Historical and structural links*

The link between left-of-centre politics and the public health movement has a very long history.<sup>1</sup> Many pathways to public health impact are political.<sup>2</sup> Policy pathways with relevance to public health can often be broadly subdivided into clinical guidelines and legislative approaches. While the former often incorporates a formal role for evidence at least as a component of the process, the latter is dominated by political ideology,<sup>3</sup> leading in turn to marked evidence-policy gaps.<sup>4</sup> Synergy between the two policy domains can also be created by the return of local public health responsibilities to local authorities in many countries.<sup>5</sup> There are clear structural reasons to believe that the general political landscape of a country will often influence its health policy, and in turn its population health.

### *Ideological links*

The European Public Health Association (EUPHA) public health vision<sup>6</sup> of “improved health and well-being and narrowing health inequalities for all” is clearly more closely aligned to pro-social politics such as social democracy and democratic socialism than pro-market politics such as conservatism, especially since social and economic inequalities are strong predictors of health inequalities and more equal societies have been shown to be more successful.<sup>7-9</sup> Moreover, academics as a community tend to hold more politically progressive views than the general population, as evidenced for example by surveys in the UK<sup>10</sup> and USA.<sup>11</sup> Nevertheless, there has been reluctance both by many individuals and public health professional societies, except specifically political societies such as the Socialist Health Association (UK), to engage with politics and advocate for their populations.<sup>12-13</sup> The current situation contrasts sharply with the period at the onset of modern academic public health when Friedrich Engels brought widespread attention to the plight of the working class for the first time in 1845,<sup>14</sup> being published in English about 40 years later.

### *Existing evidence*

5

1  
2  
3 While single-country evidence such as the review by Scott-Samuel et al<sup>15</sup> on the  
4 health effects of Thatcherism, and a recent studies on the effects of Conservative austerity in  
5 England<sup>16-17</sup> can be valuable for empirically assessing how the structural and ideological  
6 links between politics and public health play out in practice, internationally comparative  
7 evidence allows us to transcend the particularities of individual countries and assess  
8 variation in parameters that are static within a given country.<sup>18</sup> The most recent  
9 internationally comparative systematic review that assessed a wide range of political  
10 features was published in 2011 with searches up to April 2010 (the 2010 review).<sup>19</sup> This was  
11 presented as a preliminary rather than confirmatory systematic review and did not include a  
12 risk of bias assessment. It suggested that globalisation was negatively associated with  
13 population health outcomes, while democracy, welfare state and left-of-centre political  
14 tradition were positively associated. The majority of studies had been published in the five  
15 year period up to the search, indicating an active field of research. This suggests that the  
16 2010 review is likely now to be considerably out of date.

### 31 ***Aims***

32  
33  
34 The study of the relationship between politics and population health is timely, in light  
35 of concerns about the effects of Conservative spending cuts in the UK,<sup>16-17</sup> Brexit,<sup>20</sup> and a  
36 general rise in the popularity of right-wing populism.<sup>21</sup> Therefore, we offer an updated  
37 systematic review investigating relationships between four key political features (democracy,  
38 welfare state, political tradition, and globalisation) and population health outcomes. Our aim  
39 was to present the article in a way that would appeal and be accessible to the academic  
40 generalist.

### 48 **METHODS**

#### 51 ***Design***

6

1  
2  
3 A narrative systematic review design was used following the internationally accepted  
4 PRISMA guidelines.<sup>22</sup> MB was the lead reviewer. Proportionate independent second review  
5 was performed by BH for each stage in the review process.  
6  
7

### 8 9 **Data sources**

10  
11 As this was an updated systematic review, all included studies from the 2010 review  
12 proceeded directly to the full-text review stage. An update search was conducted on ten  
13 scholarly databases from 2010 to April 2017 inclusive (MEDLINE, AMED, EMBASE,  
14 PsycINFO (all Ovid), CINAHL, Philosopher's Index (both Ebsco), Science Citation Index  
15 Expanded, Social Sciences Citation Index, Emerging Sources Citation Index (all Web of  
16 Science) and Sociological Abstracts (ProQuest), following the conceptual search strategy  
17 shown in Table 1, from which search strings for the syntax of each database were  
18 developed. Supplementary searches back to 2006 were conducted on Google Scholar and  
19 in relevant bibliographies. The final search was conducted in November 2017.  
20  
21  
22  
23  
24  
25  
26  
27  
28  
29

### 30 31 **Inclusion criteria**

32  
33 Records were screened initially by title and abstract, and then in full text form for  
34 potential inclusion according to the following criteria:  
35

- 36  
37 ➤ Peer-reviewed journal article in a scientific journal or a scholarly book or chapter
- 38  
39 ➤ Study human populations either at the individual or ecological level
- 40  
41 ➤ Present at least one measure of a political exposure, conceptualised in terms of  
42 the welfare state, political tradition, democracy or globalisation
- 43  
44 ➤ Present at least one measure of a population health outcome. Healthcare  
45 spending alone was not considered an eligible outcome
- 46  
47 ➤ Use any quantitative empirical design to link the exposure to the outcome
- 48  
49 ➤ Present a comparison involving at least 2 countries
- 50  
51  
52

### 53 54 **Data extraction**



1  
2  
3 Results were classified into one of four political themes – welfare state, political  
4 tradition, democracy and globalisation. Studies were allowed to contribute to more than one  
5 political theme. The following information was extracted for each included study: i)  
6 bibliographic details, ii) sampling frame, iii) years of study, iv) design, v) political themes to  
7 which the study contributes, vi) measure(s) of political exposures, vii) measure(s) of  
8 population health outcome measures, and iix) results classification (positive, negative or  
9 inconclusive association between the political exposure and population health outcome  
10 measures).

### 11 ***Risk of bias assessment***

12 Risk of bias assessment was conducted at the study level using the Threats to  
13 Validity Tool,<sup>23</sup> using the configuration of Barnish and Barnish,<sup>24</sup> with one modification. Loss-  
14 to-follow-up was not considered relevant for the body of studies included in this review.  
15 Following Barnish et al,<sup>25</sup> the categories were set as i) low risk of bias (high quality) if  $\geq 70\%$   
16 of eligible items were assessed as at low risk of bias, ii) moderate risk of bias (moderate  
17 quality) for 40-69%, and iii) high risk of bias (low quality) for  $\leq 39\%$ . This assessment could  
18 not be conducted for studies that only comprised of book chapters, since the tool is not  
19 suitable, and format incompatibility could introduce bias into the assessment.

### 20 ***Data synthesis***

21 In light of differences in political contexts between countries, and in terms of how  
22 political exposures and population health outcomes were measured, narrative synthesis was  
23 considered more appropriate than meta-analysis. Studies were grouped by political theme.

## 24 **RESULTS**

### 25 ***Search results***

26 Seventy-three de-duplicated records came from the 2010 review. Update database  
27 searches yielded 43, 356 records in total, of which 35,207 remained following deduplication.  
28 Supplementary searches on Google Scholar and in bibliographies yielded 55 additional

records. From 35, 333 unique records, 255 proceeded to full-text screening and all were retrieved. 176 studies were included in our review, of which 106 came from our update searches and 70 from the 2010 review. 82 studies were excluded at the full-text review stage (Supplementary file 1). Studies were published in final form a median of 6 years (IQR 4-8) after the year of final data collection and the longest lag was 20 years (Figure 1). The most recent data included in the analyses was collected in 2014. A PRISMA flowchart (Figure 2) and PRISMA checklist (Supplementary file 2) are provided. Eighty-five studies (49%) were assessed at low risk of bias, 89 (51%) at moderate risk of bias and none at high risk of bias. Risk of bias assessment could not be conducted for two studies (1% of total) whose only included publications came in the form of book chapters. Study-level risk of bias profiles are provided in Supplementary file 3.

### **Welfare state**

Thirty-two studies that were eligible for our review from the 2010 review were allocated to the welfare state theme. Of these 32 studies, 23 (72%)<sup>26-48</sup> were positive, eight (25%)<sup>49-56</sup> inconclusive and one (3%)<sup>57</sup> negative about the association of the welfare state with population health. Following the addition of 70 studies from our update, of which 56 (80%)<sup>58-113</sup> were positive, 12 (17%)<sup>114-125</sup> inconclusive and two (3%)<sup>126-127</sup> negative, our review presents a total of 102 studies allocated to the welfare state theme. Of these, 79 (77%) provided evidence that was favourable about the association of increased welfare state generosity with population health, 20 (20%) were inconclusive, and three (3%) were negative. Most studies either classified welfare state generosity in terms of a welfare regime classification or in terms of expenditure on health and social care. Considering only studies that used a welfare regime classification, 73% were positive about the association of more generous welfare regimes with population health. Welfare regime classifications did vary between studies, but often compared an 'advanced', e.g. Nordic<sup>128</sup> welfare regime with liberal and also market-driven/conservative alternatives. Health outcomes for welfare state studies included self-rated general health, quality of life, prevalence of chronic conditions,

9

1  
2  
3 mental health, life expectancy and child and infant mortality. Table 2 provides study-level  
4  
5 details.

### 6 7 **Political tradition**

8  
9  
10 Twelve studies that were eligible for our review from the 2010 review were allocated  
11  
12 to the political tradition theme. All of these studies<sup>31,129-139</sup> presented results that were  
13  
14 positive about the association of left-of-centre political tradition with positive population  
15  
16 health outcomes. Following the addition of five studies from our update, of which three  
17  
18 (60%)<sup>140-142</sup> were positive and two (40%)<sup>118,143</sup> inconclusive, our review presents a total of  
19  
20 seventeen studies allocated to the political tradition theme. Of these, 15 (88%) were positive  
21  
22 about the association of left-of-centre political tradition with population health, while two  
23  
24 (12%) were inconclusive. Ways in which political tradition was measured included political  
25  
26 tradition classification of ruling government, time in power by different parties, voter  
27  
28 partisanship, proportion of seats held by left-wing or left-of-centre parties and working class  
29  
30 power. Population health outcomes included life expectancy, infant and child mortality, life  
31  
32 expectancy, older adult mortality, general self-rated health and successful implementation of  
33  
34 effective health policies. Table 3 provides study-level details.

### 35 36 **Democracy**

37  
38  
39 Twenty-seven studies that were eligible for our review from the 2010 review were  
40  
41 allocated to the democracy theme. Of these 27 studies, 21 (78%)<sup>133-135,144-161</sup> were positive,  
42  
43 four (15%)<sup>162-165</sup> were inconclusive, and two (7%)<sup>166-167</sup> were negative about the association  
44  
45 of democracy with positive population health outcomes. Following the addition of 17 studies  
46  
47 from our update, of which 13 (76%)<sup>88-89,119,143,168-176</sup> were positive and four (24%)<sup>60,177-179</sup> were  
48  
49 inconclusive, our review presents a total of 44 studies allocated to the democracy theme. Of  
50  
51 these, 34 (77%) were positive, eight (18%) were inconclusive and two (5%) negative. Ways  
52  
53 in which democracy was measured included political transition to democracy, years of  
54  
55 democracy since 1900, the presence of elections and standardised indices such as Polity  
56  
57  
58  
59  
60

1  
2  
3 IV.<sup>180</sup> Population health outcomes included measures such as general self-rated health, life  
4 expectancy, older adult mortality, and successful implementation of effective health policies,  
5 while there was a particular focus on infant and child mortality and other child health  
6 outcomes. Table 4 provides study-level details.  
7  
8  
9

### 10 11 **Globalisation**

12  
13  
14 Four studies that were eligible for our review from the 2010 were allocated to the  
15 globalisation theme. One of these studies (25%)<sup>181</sup> was positive about the association of  
16 globalisation with population, none were inconclusive, and three (75%)<sup>159,182-183</sup> were  
17 negative. Following the addition of 24 studies from our update, of which six (25%)<sup>184-189</sup> were  
18 positive, seven (29%)<sup>88,119,168, 178,190-192</sup> were inconclusive, and eleven (46%)<sup>193-203</sup> were  
19 negative, our review presents a total of 28 studies allocated to the globalisation theme. Of  
20 these, seven (25%) were positive, seven (25%) were inconclusive, and fourteen (50%) were  
21 negative. Measures of globalisation included world-system role, foreign trade, debt  
22 dependency, imports and exports, as well as membership of organisations such as the  
23 World Trade Organization and standardised indices such as the Maastricht Globalization  
24 Index<sup>204</sup> and the KOF Index.<sup>205</sup> Many studies measured infant and child health outcomes and  
25 mortality, while assessed measures including life expectancy, obesity, water pollution and  
26 tobacco smoking rates. Table 5 provides study-level results.  
27  
28  
29  
30  
31  
32  
33  
34  
35  
36  
37  
38  
39  
40

## 41 **DISCUSSION**

### 42 43 **Summary of findings**

44  
45  
46 We present a body of evidence from 176 internationally comparative scholarly  
47 studies that together provides powerful evidence that key political characteristics are  
48 important predictors of a range of population health outcomes. The evidence was favourable  
49 about a positive association with population health for all of increased welfare state  
50 generosity, left-of-centre democratic political tradition and democracy, supported by over  
51 three quarters of eligible studies. Twice as much evidence supported a negative association  
52  
53  
54  
55  
56  
57  
58  
59  
60

1  
2  
3 with population health for globalisation than a positive association, although a quarter of  
4 studies were inconclusive. The high degree consistency across a large body of studies, the  
5 large time window of many studies offering an insight into temporal relations, and supporting  
6 structural and ideological evidence all, according to the long-established Bradford Hill  
7 criteria,<sup>206</sup> would strengthen the case for a causative relationship between politics and  
8 population health outcomes.  
9

### 15 ***Methodological considerations***

18 We offer the largest systematic review on the political determinants of population  
19 health, and the first wide ranging internationally comparative systematic review of similar  
20 scope since 2010. The use of a systematic review design offers a robust and reproducible  
21 method that minimises potential reviewer bias in the selection and evaluation of studies for  
22 potential inclusion.<sup>207</sup> Our review also involved searching ten major scholarly databases and  
23 this very thorough coverage of the literature is reflected in a very low proportion of studies  
24 being identified from supplementary searches. All publications identified for full-text  
25 screening were successfully obtained. Conducting searches back to 2006 as part of our  
26 update enabled us to include a further ten eligible studies published before the search date  
27 of the 2010 review. We independently evaluated all studies from the 2010 review and  
28 allowed studies to contribute to multiple themes, allowing further relevant data to be  
29 included. The internationally comparative approach ensures relevance to readers worldwide  
30 and transcends the limitations associated with single-country studies. Unlike the authors of  
31 the 2010 review, we were able to provide a risk of bias assessment.  
32  
33  
34  
35  
36  
37  
38  
39  
40  
41  
42  
43  
44  
45  
46

47 Resources precluded a new review from inception, and required us to update an  
48 English-language only review from 2010. Limiting reviews to the English language may not  
49 exert systematic bias in systematic reviews, at least according to evidence from reviews of  
50 healthcare interventions.<sup>208</sup> The diversity of political and health-system contexts as well as  
51 measures of political exposures and population health outcomes precluded meta-analysis.  
52  
53  
54  
55  
56  
57  
58  
59  
60

1  
2  
3 The internationally comparative approach increases relevance for an international  
4 readership, yet it introduces complexities in the mapping between political characteristics  
5 and political parties in both systematic and idiosyncratic ways.<sup>209-213</sup> Devolution adds further  
6 complexity to the health policy landscape in terms of defining a country for cross-national  
7 comparison. For example, the devolved centre-left<sup>214</sup> Scottish National Party administration  
8 offers a wide range of health and social care provisions not offered in England, such as the  
9 baby box programme, free prescriptions, free dental checks, and free personal and nursing  
10 care upon assessed need. Moreover, following a protracted legal battle, Scotland is  
11 scheduled in May 2018 to become the first country globally to introduce minimum unit  
12 alcohol pricing, putting it at the vanguard of the fight against alcohol abuse, which is a major  
13 global public health issue.<sup>215</sup> Public health policy evidence is typically observational, which  
14 reflects real-world situations. Although concerns over causality have some merit,  
15 observational studies do not intrinsically overstate effect sizes<sup>216</sup> and can be highly  
16 valuable.<sup>2</sup> Moreover, there are established frameworks for assessing causality, dating back  
17 to Bradford Hill.<sup>206</sup>

### 32 33 ***Comparison with previous reviews***

34  
35  
36 Our review offers a seven and a half year search advance on the most recent  
37 internationally comparative systematic review to offer an equivalent scope. The 2010 review  
38 by Muntaner et al<sup>19</sup> included 73 studies, of which 70 were eligible for our review. Three were  
39 excluded from our review since they only included healthcare spending as an outcome. We  
40 considered that to be circular, since healthcare spending was also frequently used by  
41 studies as a marker of welfare state generosity. To these 70 studies, we added a further 106  
42 (10 of which were dated prior to the search of the 2010 review), giving a total of 176 studies  
43 in our review. Those added by our update constituted 60% of the total (58% if the 10 studies  
44 we added from prior to 2010 were removed from the numerator and denominator),  
45 demonstrating how the scale of the evidence base for the political determinants of population  
46 health has more than doubled over the past seven and a half years.

1  
2  
3 The strength of evidence that welfare state generosity is positively associated with  
4 population health has increased slightly (77% vs 72% positive), while the number of studies  
5 has more than tripled (102 vs 32). The strength of evidence that left-of-centre political  
6 tradition is positively associated with population health has increased markedly (88% vs 60%  
7 positive), while the number of studies has increased modestly (17 vs 12). Notably, far fewer  
8 studies have explicitly studied political tradition than the welfare state, which is one of the  
9 key markers of political tradition. The strength of evidence that democracy is positively  
10 associated with population health is largely unchanged (77% vs 78%), while the number of  
11 studies has increased substantially (44 vs 27). The strength of evidence that globalisation is  
12 negatively associated with population health has weakened (50% vs 75% negative), while  
13 the number of studies has increased sevenfold (28 vs 4). A prior review in the interim<sup>217</sup> had  
14 found that the strength of evidence for the benefits of welfare state generosity was greater  
15 for studies assessing spending patterns than welfare regime typologies. We did not find a  
16 strong effect – 73% of studies assessing regime typologies were positive compared to 77%  
17 of studies irrespective of how the welfare state was measured. The Nordic model found in  
18 Scandinavia was presented by most studies as the example of an advanced welfare state.  
19 However, classifications used in these typologies are imperfect, and in many ways the  
20 Scottish system could be argued to represent a more advanced welfare state, since Norway  
21 for example does not offer universal free healthcare at point of use. Our findings on the  
22 welfare state and political tradition were also consistent with those of Scott-Samuel et al<sup>15</sup>  
23 regarding Thatcherism in the UK, which found a widening of health inequalities resultant  
24 from the introduction of reduced state welfare provision and increased privatisation and pro-  
25 market policies.  
26  
27  
28  
29  
30  
31  
32  
33  
34  
35  
36  
37  
38  
39  
40  
41  
42  
43  
44  
45  
46  
47  
48

### 49 ***Future research directions***

50  
51  
52 It is important that health research increasingly focuses on real-world contexts to  
53 supplement more idealised studies.<sup>2</sup> Health research that does not consider political and  
54 cultural factors may lack relevance and generalisability.<sup>84</sup> Limited exceptions may include  
55  
56  
57  
58  
59  
60

1  
2  
3 studies into the mechanism of action of a drug or diagnostic accuracy studies, but not  
4 studies regarding their implementation into clinical practice or health policy. Political factors  
5 are especially important when conducting research into the social determinants of health,  
6 and should be more routinely taken into consideration in social health research. Examples of  
7 more specific research priorities arising from this review are to clarify and extend the  
8 apparently contradictory evidence on the health impact of globalisation, and in due course to  
9 study the observed effects of Brexit and the Trump Presidency, potentially including  
10 independent marking of published risk scorecards.<sup>20,218</sup>

### 19 ***Implications for policy and practice***

22 The implications of the evidence base we present are simple, yet the challenges are  
23 substantial in bringing into reality a world where the majority of nations, even in the  
24 developed world, are broadly well aligned in their health policy offerings to a public health  
25 vision such as “improved health and well-being and narrowing health inequalities for all”.<sup>6</sup>  
26 Advances in medical treatment often driven by evidence-based programmes such as NICE  
27 are to be welcomed, but they cannot ultimately address more deep-rooted issues such as  
28 health inequality. Indeed, these largely depend on legislation in which the role, or at least the  
29 direct role, of evidence is often limited.<sup>3-4</sup> In this context, it is important that the academic  
30 public health community is not reluctant to advocate for population health,<sup>12-13</sup> but instead is  
31 part of a wider movement for social change and raise public awareness about key issues, to  
32 seek to bring about the political features supported by this review, especially through  
33 elections. If professional societies would offer a resolute lobby for the interests of public  
34 health, the detrimental effects of the industry lobby,<sup>219-220</sup> and other ideological opponents,  
35 on public health, could potentially be countered, and public opinion could shift thereby  
36 facilitating the election of pro-social parties whose offering is more closely aligned to the  
37 vision and values of public health. Partnership approaches<sup>221</sup> targeting specific policies  
38 would appear to depend greatly on an ideological match with the potential end-user.  
39 However, where this exists to a reasonable extent, successes can occur, such as the input



15

1  
2  
3 of data from the Tobacco In PrisonS (TIPS) study<sup>222</sup> in policy seeking to make Scottish  
4 prisons smoke-free by the end of 2018.<sup>223</sup>  
5  
6

7  
8 In conclusion, we present a systematic review of 176 studies that demonstrates that  
9 politics is an important determinant of population health outcomes, and one with which the  
10 academic population health community should engage more and advocate for the health of  
11 our populations.  
12  
13  
14

## 15 16 FOOTNOTES

17  
18  
19 **Contributors:** MB was the project director and project manager. The study was  
20 conceptualised by MB with input from MT and BH. Searches were conducted by MB. Study  
21 selection, data extraction and quality assessment were conducted by MB with proportionate  
22 second review from BH. Data interpretation was led by MB with input from MT and BH. MB  
23 wrote the first draft of the paper. MT and BH commented on the draft manuscript and  
24 thereby contributed important revisions. All tables, figures and supplementary files were  
25 made by MB. All authors approved the submission. MB is the guarantor.  
26

27 **Funding:** This research received no specific grant from any funding agency in the public,  
28 commercial or not-for-profit sectors.  
29

30 **Competing interests:** The authors have personal views and/or memberships on the political  
31 left that we do not consider conflict with the vision of public health. We have no financial  
32 conflicts of interest.  
33

34 **Ethics approval:** No ethics approval was required for this systematic review of published  
35 literature.  
36

37 **Declaration:** All views presented in this article are the authors' own, and not necessarily  
38 those of their institutions nor bodies that fund their other research projects.  
39

40 **Data sharing statement:** No further data are available.  
41

## 42 REFERENCES

- 43 1. Horton R. Offline: Medicine and Marx. *Lancet* 2017; 390: 2026.
- 44 2. Barnish MS, Turner S. The value of pragmatic and observational studies in health  
45 care and public health. *Pragmat Obs Res* 2017; 8: 49-55.
- 46 3. Bambra C. The primacy of politics: the rise and fall of evidence-based public health  
47 policy? *J Public Health (Oxf)* 2013; 35: 486-7.
- 48 4. Ferrie JE. Evidence and policy: mind the gap. *Int J Epidemiol* 2015; 44: 1-7.
- 49 5. Reijneveld SA. The return of community-based health and social care to local  
50 government: governance as a public health challenge. *Eur J Public Health* 2017; 27:  
51 1.
- 52 6. European Public Health Association. Who we are. Available at:  
53 <https://eupha.org/who-we-are> [Accessed 12 November 2017]
- 54 7. Rowlingson K. Does income inequality cause health and social problems? York:  
55 Joseph Rowntree Foundation; 2011.  
56  
57  
58  
59  
60

- 1
  - 2
  - 3
  - 4
  - 5
  - 6
  - 7
  - 8
  - 9
  - 10
  - 11
  - 12
  - 13
  - 14
  - 15
  - 16
  - 17
  - 18
  - 19
  - 20
  - 21
  - 22
  - 23
  - 24
  - 25
  - 26
  - 27
  - 28
  - 29
  - 30
  - 31
  - 32
  - 33
  - 34
  - 35
  - 36
  - 37
  - 38
  - 39
  - 40
  - 41
  - 42
  - 43
  - 44
  - 45
  - 46
  - 47
  - 48
  - 49
  - 50
  - 51
  - 52
  - 53
  - 54
  - 55
  - 56
  - 57
  - 58
  - 59
  - 60
8. Marmot M. *The Marmot Review: Fair Society, Healthy Lives*. London: The Marmot Review; 2010.
  9. Wilkinson R, Pickett K. *The spirit level: why equality is better for everyone*. London: Penguin; 2010.
  10. Morgan J. General election 2017: 54% backing for Labour in THE poll. Tories backed by just 7 per cent of UK university staff responding to survey. *Times Higher Education*, 1 June 2017.
  11. Solon IS. Scholarly elites orient left, irrespective of academic affiliation. *Intelligence* 2015; 51:119-30.
  12. Mackenbach JP. Politics is nothing but medicine at a larger scale: reflections on public health's biggest idea. *J Epidemiol Community Health* 2008; 63: 181-4.
  13. Chauvin JB. Advocacy: the silence of Europe's public health associations is deafening. *Eur J Public Health* 2016; 26: 2.
  14. Engels F. *Die Lage der arbeitenden Klasse in England*. Leipzig; 1845.
  15. Scott-Samuel A, Bambra C, Collins C, et al. The impact of Thatcherism on health and wellbeing in Britain. *Int J Health Serv* 2014; 44: 53-71.
  16. Watkins J, Wulaningsih W, Da Zhou C, et al. Effects of health and social care spending constraints on mortality in England: a time trend analysis. *BMJ Open* 2017; 7: e017722.
  17. Hiam L, Dorling D, Harrison D, et al. What caused the spike in mortality in England and Wales in January 2015? *J R Soc Med* 2017; 110: 131-7.
  18. Rose G. Sick individuals and sick populations. *Int J Epidemiol* 2001; 30: 427-32.
  19. Muntaner C, Borrell C, Ng E, et al. Politics, welfare regimes, and population health: controversies and evidence. *Sociol Health Illn* 2011; 33: 946-64.
  20. Fahy N, Hervey T, Greer S, et al. How will Brexit affect health and health services in the UK? Evaluating three possible scenarios. *Lancet* 2017; 390: 2110-8.
  21. Greer SL. Medicine, public health and the populist radical right. *J R Soc Med* 2017; 110: 305-8.
  22. Moher D, Liberati A, Tetzlaff J, et al. Preferred reporting items for systematic reviews and meta-analyses: the PRISMA statement. *BMJ* 2009; 339: b2535.
  23. Daley DJ, Myint PK, Gray RJ, et al. Systematic review on factors associated with medication non-adherence in Parkinson's disease. *Parkinsonism Relat Disord* 2012; 18: 1053-61.
  24. Barnish MS, Barnish J. High-heeled shoes and musculoskeletal injuries: a narrative systematic review. *BMJ Open* 2016; 6: e010053.
  25. Barnish MS, Whibley D, Horton SMC, et al. Roles of cognitive status and intelligibility in everyday communication in people with Parkinson's disease: a systematic review. *J Parkinsons Dis* 2016; 6: 453-62.
  26. Avendano M, Juerges H, Mackenbach JP. Educational level and changes in health across Europe: longitudinal results from SHARE. *J Eur Soc Policy* 2009; 19: 301-16.
  27. Bambra C. Cash versus services: 'worlds of welfare' and the decommodification of cash benefits and health care services. *J Soc Policy* 2005; 34: 195-213.
  28. Bambra C. Health status and the worlds of welfare. *Soc Policy Soc* 2006; 5: 53-62.
  29. Bambra C, Eikemo TA. Welfare state regimes, unemployment and health: a comparative study of the relationship between unemployment and self-reported health in 23 European countries. *J Epidemiol Community Health* 2009; 63: 92-8.
  30. Burstrom B, Whitehead M, Clayton S, et al. Health inequalities between lone and couple mothers and policy under different welfare regimes – the example of Italy, Sweden and Britain. *Soc Sci Med* 2010; 70: 912-20.
  31. Chung H, Muntaner C. Political and welfare state determinants of infant and child health indicators: an analysis of wealthy countries. *Soc Sci Med* 2006; 63: 829-42.
  32. Chung H, Muntaner C. Welfare state matters: a typological multilevel analysis of wealthy countries. *Health Policy* 2007; 80:328-39.
  33. Conley D, Springer KW. Welfare state and infant mortality. *Am J Sociol* 2001; 107: 768-807.

- 1
- 2
- 3 34. Eikemo TA, Bambra C, Judge K, et al. Welfare state regimes and differences in self-
- 4 perceived health in Europe: a multilevel analysis. *Soc Sci Med* 2008; 66: 2281–95.
- 5 35. Elola J, Daponte A, Navarro V. Health indicators and the organization of healthcare
- 6 systems in Western Europe. *Am J Public Health* 1995; 85: 1397–1401.
- 7 36. Fayissa B. The determinants of infant and child mortality in developing countries: the
- 8 case of Sub-Sahara Africa. *Rev Black Polit Econ* 2001; 29: 83–100.
- 9 37. Grosse Frie K, Eikemo TA, Knesebeck OvD. Education and self-reported health care
- 10 seeking behaviour in European welfare regimes: results from the European Social
- 11 Survey. *Int J Public Health* 2010; 55: 217–20.
- 12 38. Karim SA, Eikemo TA, Bambra C. Welfare state regimes and population health:
- 13 integrating the East Asian welfare states. *Health Policy* 2010; 94: 45–53.
- 14 39. Klomp J, de Haan J. Effects of governance on health: a cross-national analysis of
- 15 101 Countries. *Kyklos* 2008; 61: 599–614.
- 16 40. Lundberg O, Yngwe MA, Stjerne MK, et al. The role of welfare state principles and
- 17 generosity in social policy programmes for public health: an international comparative
- 18 study. *Lancet* 2008; 372: 1633–40.
- 19 41. Menon-Johansson MA. Good governance and good health: the role of societal
- 20 structures in the human immunodeficiency virus pandemic. *BMC Int Health Hum*
- 21 *Rights* 2005; 5: 96–111.
- 22 42. Nordenmark M, Strandh M, Layte R. The impact of unemployment benefit system on
- 23 the mental well-being of the unemployed in Sweden, Ireland and Great Britain. *Eur*
- 24 *Societies* 2006; 8: 83–110.
- 25 43. Raphael D, Bryant T. The welfare state as a determinant of women's health: support
- 26 for women's quality of life in Canada and four comparison nations. *Health Policy*
- 27 2004; 68: 63–79.
- 28 44. Rostila M. Social capital and health in European welfare regimes: a multilevel
- 29 approach. *J Eur Soc Policy* 2007; 17: 223–39.
- 30 45. Sanders AE, Slade GD, John MT, et al. A cross-national comparison of income
- 31 gradients in oral health quality of life in four welfare states: application of the Korpi
- 32 and Palme typology. *J Epidemiol Community Health* 2009; 63: 569–74.
- 33 46. Sekine M, Chandola T, Martikainen P, et al. Socioeconomic inequalities in physical
- 34 and mental functioning of British, Finnish, and Japanese civil servants: role of job
- 35 demand, control, and work hours. *Soc Sci Med* 2009; 69: 1417–25.
- 36 47. Veenhoven R, Ouweneel P. Livability of the welfare-state – appreciation-of-life and
- 37 length-of-life in nations varying in state-welfare-effort. *Soc Indic Res* 1995; 36: 1–48.
- 38 48. Zambon A, Boyce W, Cois E, et al. Do welfare regimes mediate the effect of
- 39 socioeconomic position on health in adolescence? A cross-national comparison in
- 40 Europe, North America, and Israel. *Int J Health Serv* 2006; 36: 309–29.
- 41 49. Bambra C, Pope D, Swami V, et al. Gender, health inequalities and welfare state
- 42 regimes: a cross-national study of 13 European countries. *J Epidemiol Community*
- 43 *Health* 2009; 63: 38–44.
- 44 50. Dahl E, van der Wel KA. Educational inequalities in health in European welfare
- 45 states: a social expenditure approach. *Soc Sci Med* 2013; 81:60–9.
- 46 51. Eikemo TA, Huisman M, Bambra C, et al. Health inequalities according to
- 47 educational level in different welfare regimes: a comparison of 23 European
- 48 countries. *Sociol Health Illn* 2008; 30: 565–82.
- 49 52. Farfan-Portet M, Popham F, Mitchell R, et al. Caring, employment and health among
- 50 adults of working age: evidence from Britain and Belgium. *Eur J Public Health* 2010;
- 51 20: 52–7.
- 52 53. Muntaner C, Borrell C, Kunst A, et al. Social class inequalities in health: does welfare
- 53 state regime matter? In Raphael D, Bryant T, Rioux MH, editors. *Staying alive: critical*
- 54
- 55
- 56
- 57
- 58
- 59
- 60

- perspectives on health, illness, and health care. Toronto: Canadian Scholars Press; 2006.
54. Ouweneel P. Social security and well-being of the unemployed in 42 nations. *J Happiness Stud* 2002; 3: 167–92.
55. Veenhoven R. Well-being in the welfare state. *J Comp Policy Anal* 2000; 2: 91–125.
56. Whitehead M, Burstrom B, Diderichsen, F. Social policies and the pathways to inequalities in health: a comparative analysis of lone mothers in Britain and Sweden. *Soc Sci Med* 2000; 50: 255–70.
57. Lahelma E, Arber S. Health inequalities among men and women in contrasting welfare states: Britain and three Nordic countries compared. *Eur J Public Health* 1994; 37: 213–26.
58. Ades F, Senterre C, de Azambuja E, et al. Discrepancies in cancer incidence and mortality and its relationship to health expenditure in the 27 European Union member states. *Ann Oncol* 2013; 24: 2897-902.
59. Akinci F, Hamidi S, Suvankulov F, et al. Examining the impact of health care expenditures on health outcomes in the Middle East and N. Africa. *J Health Care Finance* 2014; 41(1): 1-23.
60. Batniji R, Khatib L, Cammett M, et al. Governance and health in the Arab world. *Lancet* 2014; 383: 343-55.
61. Bentley RJ, Pevalin D, Baker E, et al. Housing affordability, tenure and mental health in Australia and the United Kingdom: a comparative panel analysis. *Housing Studies* 2016; 31: 208-22.
62. Bradley EH, Elkins BR, Herrin J, et al. Health and social services expenditures: associations with health outcomes. *BMJ Qual Saf* 2011; 20:826–831.
63. Brandt M, Hank K. Scars that will not disappear: long-term associations between early and later life unemployment under different welfare regimes. *J Soc Policy* 2014; 43: 727-43.
64. Copeland A, Bambra C, Nylén L, et al. All in it together? The effects of recession on population health and health inequalities in England and Sweden, 1991-2010. *Int J Health Serv* 2015; 45: 3-24.
65. Corsi DJ, Subramanian SV. Association between coverage of maternal and child health interventions, and under-5 mortality: a repeated cross-sectional analysis of 35 sub-Saharan African countries. *Glob Health Action* 2014; 7: 24765.
66. Craveiro D. Ties and inequalities in later life: welfare state regime and the role of social networks in health inequalities in later life in Europe. *Eur Soc* 2017; 19: 268-71.
67. Dahl E, van der Wel KA. Educational inequalities in health in European welfare states: a social expenditure approach. *Soc Sci Med* 2013; 81:60–9.
68. Deeming C, Hayes D. Worlds of welfare capitalism and wellbeing: a multilevel analysis. *J Soc Policy* 2012; 41: 811-29.
69. Devaux M. Income-related inequalities and inequities in health care services utilisation in 18 selected OECD countries. *Eur J Health Econom* 2015; 16: 21-33.
70. Dragano N, Siegrist J, Wahrendorf M. Welfare regimes, labour policies and unhealthy psychosocial working conditions: a comparative study with 9917 older employees from 12 European countries. *J Epidemiol Community Health* 2010; 65: 793-9.
71. Dujardin C, Farfan-Portet M-I, Mitchell R, et al. Does country influence the health burden of informal care? An international comparison between Belgium and Great Britain. *Soc Sci Med* 2011; 73: 1123-32.
72. Engster D, Stensöta HO. Do family policy regimes matter for children's well-being? *Soc Polit* 2011, 18(1):82–124.
73. Esser I, Palme J. Do public pensions matter for health and wellbeing among retired persons? Basic and income security pensions across 13 Western European countries. *Int J Soc Welfare* 2010; 19: S103-20.

- 1
  - 2
  - 3
  - 4
  - 5
  - 6
  - 7
  - 8
  - 9
  - 10
  - 11
  - 12
  - 13
  - 14
  - 15
  - 16
  - 17
  - 18
  - 19
  - 20
  - 21
  - 22
  - 23
  - 24
  - 25
  - 26
  - 27
  - 28
  - 29
  - 30
  - 31
  - 32
  - 33
  - 34
  - 35
  - 36
  - 37
  - 38
  - 39
  - 40
  - 41
  - 42
  - 43
  - 44
  - 45
  - 46
  - 47
  - 48
  - 49
  - 50
  - 51
  - 52
  - 53
  - 54
  - 55
  - 56
  - 57
  - 58
  - 59
  - 60
74. Foubert J, Levecque K, van Rossem R, et al. Do welfare regimes influence the association between disability and self-perceived health? A multilevel analysis of 57 countries. *Soc Sci Med* 2014; 117: 10-7.
75. Fritzell J, Kangas O, Bacchus Hertzman J, et al. Cross-temporal and cross-national poverty and mortality rates among developed countries. *J Environ Public Health* 2013; 2013: 915490.
76. Gesthuizen M, Huijts T, Kraaykamp G. Explaining health marginalisation of the lower educated: the role of cross-national variations in health expenditure and labour market conditions. *Sociol Health Illn* 2012, 34:591–607.
77. Gilligan AM, Skrepnek GH. Determinants of life expectancy in the Eastern Mediterranean Region. *Health Policy Plan* 2015; 30, 624-37.
78. Glass J, Andersson MA, Simon RW. Parenthood and happiness: effects of work-family reconciliation policies in 22 OECD countries. *Am J Sociol* 2016; 122, 886-929.
79. Guarnizo-Herreño CC, Tsakos G, Sheiham A, et al. Oral health and welfare state regimes: a cross-national analysis of European countries. *Eur J Oral Sci* 2013; 121: 169-75.
80. Harding S, Lenguerrand E, Costa G, et al. Trends in mortality by labour market position around retirement ages in three European countries with different welfare regimes. *Int J Public Health* 2013; 58: 99-108.
81. Hájek O, Grebeníček P, Popesko B, et al. Czech Republic vs EU-27: economic level, health care and population health. *Cent Eur J Public Health* 2012; 20(3): 167-73.
82. Heijink R, Koolman X, Westert GP. Spending more money, saving more lives? The relationship between avoidable mortality and healthcare spending in 14 countries. *Eur J Health Econ* 2013; 14: 527-38.
83. Kouvo A, Räsänen P. Foundations of subjective well-being in turbulent times: a comparison of four European countries. *Int J Sociol Soc Policy* 2015; 35: 2-17.
84. Levecque K, van Rossem R, de Boyser K, et al. Economic hardship and depression across the life course: the impact of welfare state regimes. *J Health Soc Behav* 2011; 52: 262-76.
85. Lin R-T, Chien L-C, Chen Y-M, et al. Governance matters: an ecological association between governance and child mortality. *Int Health* 2014; 6: 249-57.
86. López-Casasnovas G, Soley-Bori M. The socioeconomic determinants of health: economic growth and health in the OECD countries during the last three decades. *Int J Environ Res Public Health* 2014; 11: 815-29.
87. McKinnon B, Harper S, Kaufman JS. Do socioeconomic inequalities in neonatal mortality reflect inequalities in coverage of maternal health services? Evidence from 48 low- and middle-income countries. *Matern Child Health J* 2016; 20: 434-6.
88. Maynard G. Health international non-governmental organizations, democracy, and tuberculosis mortality in developing nations: a longitudinal analysis. *Sociol Spectr* 2016; 36: 303-20.
89. Minagawa Y. Inequalities in healthy life expectancy in Eastern Europe. *Populat Dev Rev* 2013; 39: 649-71.
90. Moor N, de Graaf PM, Komter A. Family, welfare state generosity and the vulnerability of older adults: a cross-national survey. *J Aging Stud* 2013; 27: 347-57.
91. Muldoon KA, Galway LP, Nakajima M, et al. Health system determinants of infant, child and maternal mortality: a cross-sectional study of UN member countries. *Global Health* 2011; 7:42.
92. Muntaner C, Davis O, Mclsaack K, et al. Retrenched welfare regimes still lessen social class inequalities in health: a longitudinal analysis of the 2003–2010 EU-SILC in 23 European countries. *Int J Health Serv* 2017: 47: 410-31.
93. Nelson K, Fritzell J. Welfare states and population health: the role of minimum income benefits for mortality. *Soc Sci Med* 2014; 112: 63-71.
94. Novignon J, Olakojo SA, Novignon J. The effects of public and private health care expenditure on health status in sub-Saharan Africa: new evidence from panel data analysis. *Health Econ Rev* 2012; 2: 22.

- 1
- 2
- 3 95. Olafsdottir S. Fundamental causes of health disparities: stratification, the welfare
- 4 state, and health in the United States and Iceland. *J Health Soc Behav* 2007; 48:
- 5 239-253.
- 6 96. Olsen KM, Dahl SA. Health differences between European countries. *Soc Sci Med*
- 7 2007, 64: 1665-78.
- 8 97. Palència L, Malmusi D, de Moortel D, et al. The influence of gender equality policies
- 9 on gender inequalities in health in Europe. *Soc Sci Med* 2013; 117: 25-33.
- 10 98. Pickett KE, Wilkinson RG. Child wellbeing and income inequality in rich countries:
- 11 ecological cross sectional study. *BMJ* 2007; 335: 1080.
- 12 99. Pinzón-Flórez CE, Fernández-Niño JA, Ruiz-Rodríguez M, et al et al. Determinants
- 13 of performance of health systems concerning maternal and child health: a global
- 14 approach. *PLoS ONE* 2015; 10: e0120747.
- 15 100. Ploubidis GB, Dale C, Grundy E. Later life health in Europe: how important
- 16 are country level influences? *Eur J Ageing* 2012; 9:5–13.
- 17 101. Popham F, Dibben C, Bambra C. Are health inequalities really not the
- 18 smallest in the Nordic welfare states? A comparison of mortality inequality in 37
- 19 countries. *J Epidemiol Community Health* 2013; 67: 412-8.
- 20 102. Reeves A, Basu S, McKee M, et al. Social protection and tuberculosis control
- 21 in 21 European countries, 1995-2012: a cross-national statistical modelling analysis.
- 22 *Lancet Infect Dis* 2014; 14: 1105-12.
- 23 103. Richter M, Rathman K, Nic Gabhainn S, et al. Welfare state regimes, health
- 24 and health inequalities in adolescence: a multilevel study in 32 countries. *Sociol*
- 25 *Health Illn* 2012; 34: 858-79.
- 26 104. Rovny AE. Welfare state policy determinants of fertility level: a comparative
- 27 analysis. *J Eur Soc Policy* 2011; 21: 335-47.
- 28 105. Sacker A, Worts D, McDonough P. Social influences on trajectories of self-
- 29 rated health: evidence from Britain, Germany, Denmark and the USA. *J Epidemiol*
- 30 *Community Health* 2011; 65:130-6.
- 31 106. Sarti S, Alberio M, Terraneo M. Health inequalities and the welfare state in
- 32 European families. *J Sociol Soc Welfare Needs* 2013; 40: 103-30.
- 33 107. Stuckler D, Basu S, McKee M. Budget crises, health, and social welfare
- 34 programmes. *BMJ* 2010, 340:c3311.
- 35 108. Van der Heuvel M, Hopkins J, Biscaro A, et al. A comparative analysis of
- 36 early child health and development services and outcomes in countries with different
- 37 redistributive policies. *BMC Public Health* 2013; 13: 1049.
- 38 109. Van der Wel KA, Dahl E, Thielen K. Social inequalities in 'sickness':
- 39 European welfare states and non-employment among the chronically ill. *Soc Sci Med*
- 40 2011; 73: 1608-17.
- 41 110. Van Tuyckom C. Macro-environmental factors associated with leisure-time
- 42 physical activity: a cross-national analysis of EU countries. *Scand J Public Health*
- 43 2011; 39: 419-26.
- 44 111. Vahid Shahidi F, Siddiqi A, Muntaner C. Does social policy moderate the
- 45 impact of unemployment on health? A multilevel analysis of 23 welfare states. *Eur J*
- 46 *Public Health*. *Eur J Public Health* 2016; 26: 1017-22.
- 47 112. Wu JCL, Chiang TL. Comparing child mortality in Taiwan and selected
- 48 industrialized countries. *J Formos Med Assoc*. 2007, 106 (2): 177-180.
- 49 113. York R, Bell SE. Life satisfaction across nations: the effects of women's
- 50 political status and public priorities. *Soc Sci Res* 2014; 48: 48-61.
- 51 114. Bambra C, Lunau T, van der Wel KA, et al. Work, health, and welfare: the
- 52 association between working conditions, welfare states, and self-reported general
- 53 health in Europe. *Int J Health Serv* 2014; 44: 113-36.
- 54 115. Bremberg SG. The rate of country-level improvements of the infant mortality
- 55 rate is mainly determined by previous history. *Eur J Public Health* 2016; 26: 597-601.
- 56 116. Elgar FJ, Aitken N. Income inequality, trust and homicide in 33 countries. *Eur*
- 57 *J Public Health* 2011; 21: 241-6.
- 58
- 59

- 1
- 2
- 3 117. Esmaeli A, Mansouri S, Moshavash M. Income inequality and population
- 4 health in Islamic countries. *Public Health* 2011; 125: 577-84.
- 5 118. Granados JAT. Politics and health in eight European countries: a comparative
- 6 study of mortality decline under social democracies and right-wing governments. *Soc*
- 7 *Sci Med* 2010; 71: 841-50.
- 8 119. Hauck K, Martin S, Smith PC. Priorities for action on the social determinants
- 9 of health: empirical evidence on the strongest associations with life expectancy in 54
- 10 low-income countries, 1990-2012. *Soc Sci Med* 2016; 167: 88-98.
- 11 120. Levecque K, Van Rossem R. Depression in Europe: does migrant integration
- 12 have mental health payoffs? A cross-national comparison of 20 European countries.
- 13 *Ethn Health* 2015; 20: 49-65.
- 14 121. Miething A, Lundberg O, Geyer S. Income and health in different welfare
- 15 contexts: a comparison of Sweden, East and West Germany. *Scand J Public Health*
- 16 2013; 41: 260-8.
- 17 122. Platts LG. A prospective analysis of labour market status and self-rated health
- 18 in the UK and Russia. *Econ Transit* 2015; 23(2): 343-70.
- 19 123. Shim J. Social welfare expenditures and infant mortality. *Soc Work Public*
- 20 *Health* 2015; 30: 567-77.
- 21 124. Stavrova O, Schlösser T, Fetchenhauer D. Are the unemployed equally
- 22 unhappy all over the world? The role of the social norms to work and welfare state
- 23 provision in 28 OECD countries. *J Econ Psychol* 2011; 32: 159-71.
- 24 125. Vöörmann R, Helemäe J. A comparative analysis of gender differences in
- 25 self-rated health: is the Baltic Sea a frontier of the East-West health divide in
- 26 Europe? *Filosofija-Sociologija* 2013; 24(2): 62-70.
- 27 126. Fritzell S, Vannoni F, Whitehead M, et al. Does non-employment contribute to
- 28 the health disadvantage among lone mothers in Britain, Italy and Sweden? Synergy
- 29 effects and the meaning of family policy. *Health Place* 2012; 18: 199-208.
- 30 127. Hoffman R. Socioeconomic inequality in old-age mortality: a comparison of
- 31 Denmark and the USA. *Soc Sci Med* 2011; 72: 1986-92.
- 32 128. Kildal N, Kuhnle S. The Nordic welfare model and the idea of universalism. In:
- 33 Kildal N, Kuhnle S, editors. *Normative foundations of the welfare state: the Nordic*
- 34 *experience*. London: Routledge; 2006, pp.13-33.
- 35 129. Borrell C, Espelt A, Rodriguez-Sanz M, et al. Analysing differences in the
- 36 magnitude of socioeconomic inequalities in self-perceived health by countries of
- 37 different political tradition in Europe. *Int J Health Serv* 2009; 39: 321-41.
- 38 130. Cereseto S, Waitzkin, H. Economic-development, political-economic system,
- 39 and the physical quality-of-life. *Am J Public Health* 1986; 76: 661-66.
- 40 131. Correa H, Namkoong K. Determinants and effects of health policy. *Journal*
- 41 *Policy Model* 1992; 14: 41-63.
- 42 132. Espelt A, Borrell C, Rodriguez-Sanz, M, et al. Inequalities in health by social
- 43 class dimensions in European countries of different political traditions. *Int J Epidemiol*
- 44 2008; 37: 1095-1105.
- 45 133. Lena HF, London B. The political and economic-determinants of health
- 46 outcomes – a cross-national analysis. *Int J Health Serv* 1993; 23: 585-602.
- 47 134. London B, Williams BA. National politics, international dependency, and basic
- 48 needs provision – a cross-national analysis. *Soc Forces* 1990; 69: 565-84.
- 49 135. Moon BE, Dixon WJ. Politics, the state, and basic human-needs – a cross-
- 50 national-study. *Am J Polit Sci* 1985; 29: 661-94.
- 51 136. Muntaner C, Lynch JW, Hillemeier M, et al. Economic inequality, working-
- 52 class power, social capital, and cause-specific mortality in wealthy countries. *Int J*
- 53 *Health Serv* 2002; 32: 629-56.
- 54 137. Navarro V, Muntaner C, Borrell C, et al. Politics and health outcomes. *Lancet*
- 55 2006; 368: 1033-37.
- 56
- 57
- 58
- 59
- 60

- 1  
2  
3 138. Navarro V, Borrell C, Benach J, et al. The importance of the political and the  
4 social in explaining mortality differentials among the countries of the OECD,  
5 1950–1998. *Int J Health Serv* 2003; 33: 419–94.
- 6 139. Navarro V, Shi LY. The political context of social inequalities and health. *Int J*  
7 *Health Serv* 2001; 31: 1–21.
- 8 140. Bosdriez JR, Willemsen MC, Stronks K, et al. Tobacco control policy  
9 development in the European Union: do political factors matter? *Eur J Public Health*  
10 2015; 25: 190–4.
- 11 141. Huijts T, Perkins JM, Subramanian SV. Political regimes, political ideology  
12 and self-rated health in Europe: a multilevel analysis. *PLoS One* 2010; 5: e11711.
- 13 142. Lin R-T, Chen Y-M, Chien L-C, et al. Political and social determinants of life  
14 expectancy in less developed countries: a longitudinal study. *BMC Public Health*  
15 2012; 12: 85
- 16 143. Mackenbach JP, McKee M. A comparative analysis of health policy  
17 performance in 43 European countries. *Eur J Public Health* 2013; 23: 195–201.
- 18 144. Alvarez-Dardet C, Franco-Giraldo A. Democratisation and health after the fall  
19 of the Wall. *J Epidemiol Community Health* 2006; 60: 669–71.
- 20 145. Baum MA, Lake DA. The political economy of growth: democracy and human  
21 capital, *Am J Pol Sci* 2003; 47: 333–47.
- 22 146. Besley T, Kudamatsu M. Health and democracy. *Am Econ Rev* 2006; 96:  
23 313–18.
- 24 147. Franco A, Alvarez-Dardet C, Ruiz MT. Effect of democracy on health:  
25 ecological study, *BMJ* 2004; 329: 1421–23.
- 26 148. Frey RS, Al-Roumi A. Political democracy and the physical quality of life: the  
27 cross-national evidence. *Soc Indic Res* 1999; 47: 73–97.
- 28 149. Ghobarah HA, Huth P, Russett, B. Comparative public health: the political  
29 economy of human misery and well-being. *Int Stud Q* 2004; 48: 73–94.
- 30 150. Gizelis T. Wealth alone does not buy health: political capacity, democracy,  
31 and the spread of AIDS. *Polit Geogr* 2009; 28: 121–31.
- 32 151. Kick EL, Nasser R, Davis BL, et al. Militarization and infant-mortality in the  
33 third-world. *J Polit Militar Sociol* 1990; 18: 285–305.
- 34 152. Klomp J, de Haan, J. Is the political system really related to health? *Soc Sci*  
35 *Med* 2009; 69: 36–46.
- 36 153. Lake DA, Baum MA. The invisible hand of democracy – political control and  
37 the provision of public services. *Comp Polit Stud* 2001; 34: 587–621.
- 38 154. Navia P, Zweifel TD. Democracy, dictatorship, and infant mortality revisited. *J*  
39 *Democracy* 2003; 14: 90–103.
- 40 155. Pillai VK, Gupta R. Cross-national analysis of a model of reproductive health  
41 in developing countries. *Soc Sci Res* 2006; 35: 210–27.
- 42 156. Rudra N, Haggard S. Globalization, democracy, and effective welfare  
43 spending in the developing world. *Comp Polit Stud* 2005; 38: 1015–49.
- 44 157. Safaei J. Is democracy good for health? *Int J Health Serv* 2006; 36: 767–86.
- 45 158. Shandra JM, Shandra CL, London B. Do non-governmental organizations  
46 impact health? A cross-national analysis of infant mortality. *Int J Comp Sociol* 2010;  
47 51: 137–164.
- 48 159. Shandra JM, Nobles J, London B, et al. Dependency, democracy, and infant  
49 mortality: a quantitative, cross-national analysis of less developed countries. *Soc Sci*  
50 *Med* 2004; 59: 321–33.
- 51 160. Stroup MD. Economic freedom, democracy, and the quality of life. *World Dev*  
52 2007; 35: 52–66.
- 53 161. Zweifel TD, Navia P. Democracy, dictatorship, and infant mortality. *J*  
54 *Democracy* 2000; 11: 99–114.
- 55  
56  
57  
58  
59  
60



162. Houweling TAJ, Caspar AEK, Looman WN, et al. Determinants of under-5 mortality among the poor and the rich: a cross-national analysis of 43 developing countries. *Int J Epidemiol* 2005; 34: 1257–65.
163. Ross M. Is democracy good for the poor? *Am J Polit Sci* 2006; 50: 860–74.
164. Tsai MC. Does political democracy enhance human development in developing countries? A cross-national analysis, *Am J Econ Sociol* 2006; 65: 233–68.
165. Wejnert B. Effect of global democracy on women's reproductive health: 1970–2005, cross-world analysis. *Marriage Fam Rev* 2008; 41 (3-4): 14–37.
166. Adeyi O, Chellaraj G, Goldstein E, et al. Health status during the transition in Central and Eastern Europe: Development in reverse? *Health Policy Plan* 1997; 12: 132–45.
167. Gauri V, Khaleghian P. Immunization in developing countries: its political and organizational determinants, *World Dev* 2002; 30: 2109–32.
168. Chuang K-Y, Sung P-W, Chang C-J, et al. Political and economic characteristics as moderators of the relationship between health services and infant mortality in less-developed countries. *J Epidemiol Community Health* 2013; 67: 1006–12.
169. Doherty AM, Kelly BD. Social and psychological correlates of happiness in 17 European countries. *Irish J Psychol Med* 2010; 27(3): 130–4.
170. Fumagalli E, Mentzakis E, Suhrcke M. Do political factors matter in explaining under- and overweight outcomes in developing countries. *J Socioecon* 2013; 46: 48–56.
171. Klenk J, Keil U, Jaensch A, et al. Changes in life expectancy 1950-2010: contributions from age- and disease-specific mortality in selected countries. *Population Health Metrics* 2016; 14: 20.
172. Krueger PM, Dovel K, Denney JT. Democracy and self-rated health across 67 countries: a multilevel analysis. *Soc Sci Med* 2015; 143: 137.
173. Kudamatsu M. Has democratization reduced infant mortality in sub-Saharan Africa? *J Eur Econ Assoc* 2012; 10: 1294–317.
174. Mackenbach JP. Political conditions and life expectancy in Europe, 1990–2008. *Soc Sci Med* 2013; 82: 134–46.
175. Mackenbach JP, Hu Y, Looman CWN. Democratization and life expectancy in Europe, 1960–2008. *Soc Sci Med* 2013; 93: 166–75.
176. Witvliet MI, Kunst A, Arah OA, et al. Sick regimes and sick people: a multilevel investigation of the population health consequences of perceived national corruption. *Trop Med Internat Health* 2013; 18: 1240–7.
177. Burroway R. Democracy and child health in developing countries. *Int J Comparat Sociol* 2016; 57: 338–64.
178. Chuang Y-C, Sung P-W, Chao HJ, et al. A longitudinal ecological study of the influences of political, economic, and health services characteristics on under-five mortality in less-developed countries. *Health Place* 2013; 23: 111–21.
179. Dietrich S, Bernhard M. State or regime? The impact of institutions on welfare outcomes. *Eur J Develop Res* 2015; 28: 252–69.
180. Marshall MG, Jagers K. *Polity IV project: political regime characteristics and transitions*. Severn, MD: Center for Systemic Peace; 2006.
181. Moore S, Teixeira AC, Shiell, A. The health of nations in a global context: trade, global stratification, and infant mortality rates. *Soc Sci Med* 2006; 63: 165–78.
182. Shen C, Williamson JB. Accounting for cross-national differences in infant mortality decline (1965–1991) among less developed countries: effects of women's status, economic dependency, and state strength. *Soc Ind Res* 2001; 53: 257–88.
183. Shen C, Williamson JB. Child mortality, women's status, economic dependency, and state strength: a cross-national study of less developed countries, *Social Forces* 1997; 76: 667–700.

184. Bergh A, Nilsson T. Good for living? On the relationship between globalization and life expectancy. *World Dev* 2010; 38: 1191-1203.
185. Cross P, Edwards RT, Opondo M, et al. Does farm worker health vary between localised and globalised food supply systems? *Environ Int* 2009; 35: 1004-14.
186. Gerring J, Thacker SC. Do neoliberal economic policies kill or save lives? *Bus Polit* 2008; 10: 1-33.
187. Martens P, Akin SM, Maud H, et al. Is globalization healthy: a statistical indicator analysis of the impacts of globalization on health. *Glob. Health* 2010; 6:16.
188. Mukherjee N, Kriekhaus J. Globalization and human well-being. *Int Polit Sci Rev* 2012; 33(2): 150-70.
189. Owen AL, Wu S. Is trade good for your health? *Rev Int Econ* 2007; 15: 660-82.
190. Bozorgmehr K, Sebastian M. 2014. Trade liberalization and tuberculosis incidence: a longitudinal multi-level analysis in 22 high burden countries between 1990 and 2010. *Health Policy Plan* 2014; 29: 328-51.
191. Levine DI, Rothman D. Does trade affect child health? *J Health Econ* 2006; 25: 538-54.
192. Oberlander L, Disdier A-C, Etilé F. Globalisation and national trends in nutrition and health: A grouped fixed-effects approach to intercountry heterogeneity. *Health Econ* 2017; 26: 1146-61.
193. Costa-Font J, Mas N. 'Globesity'? The effects of globalization on obesity and caloric intake. *Food Policy* 2016; 64: 121-32.
194. De Vogli RD, Kouvonen A, Elovainio M, et al. Economic globalization, inequality and body-mass index: a cross-national analysis of 127 countries. *Crit Public Health* 2014; 24: 7-21.
195. Estimé MS, Lutz B, Strobel F. Trade as a structural driver of dietary risk factors for noncommunicable diseases in the pacific: an analysis of household income and expenditure survey data. *Globalization Health* 2014; 10: 48.
196. Fan VY, Faioso Le'au R. Insights in public health: a tale of two polities: health in Independent and American Samoa. *Hawai'i J Med Public Health* 2015; 74: 179-84.
197. Goryakin Y, Lobstein T, James WPT, et al. The impact of economic, political and social globalization on overweight and obesity in the 56 low and middle income countries. *Soc Sci Med* 2015; 133: 67-76.
198. Jolly CM, Namugabo E, Nguyen G, et al. Net food imports and obesity in selected Latin American & Caribbean countries. *Adv Manag Appl Econom* 2013; 3(6): 159-77.
199. Jorgenson AK. Foreign direct investment and the Environment, the mitigating influence of Institutional and Civil Society factors, and relationships between industrial pollution and human health a panel study of less-developed countries. *Organ Environ* 2009; 22: 135-57.
200. Jorgenson AK. Political-economic integration, industrial pollution and human health: a panel study of less-developed countries, 1980-2000. *Int. Sociol* 2009; 24: 115-43.
201. Maynard G. Neoliberal trade and investment policies, the ITGA and youth smoking rates: a cross-national analysis of developing nations. *Sociol Spectr* 2015; 35: 419-41.
202. Milner A, McLure R, Sun J, et al. Globalization and suicide: an empirical investigation in 35 countries over the period 1980-2006. *Health Place* 2011; 17: 996-1003.
203. Oster E. Routes of infection: exports and HIV incidence in sub-Saharan Africa. *J Eur Econ Assoc* 2012; 10: 1025-58.
204. Figge L, Martens P. Globalisation continues: the Maastricht Globalization Index revisited and updated. *Globalizations* 2014; 11: 875-93.

- 1  
2  
3 205. Dreyer A. Does globalization affect growth? Evidence from a new index of  
4 globalization. *Appl Econom* 2006; 38: 1091-110.
- 5 206. Hill AB. The environment and disease: association or causation? *Proceed R*  
6 *Soc Med* 1965; 58: 295-300.
- 7 207. Uman LS. Systematic reviews and meta-analyses. *J Can Acad Child Adolesc*  
8 *Psychiatry* 2011; 20: 57-59.
- 9 208. Jüni P, Holenstein F, Sterne J, et al. Direction and impact of language bias in  
10 meta-analyses of controlled trials. *Int J Epidemiol* 2002; 31: 115-23.
- 11 209. Goldfarb M. Liberal? Are we talking about the same thing? *BBC News*, 20  
12 July 2010.
- 13 210. Thorpe A. *A history of the British Labour Party*. Basingstoke: Palgrave  
14 Macmillan; 2008.
- 15 211. Scott-Samuel A, Bambra C. A week is a long time in politics: the health  
16 implications of Jeremy Corbyn's UK Labour Party leadership victory. *Int J Health*  
17 *Serv* 2016; 46: 141-48.
- 18 212. Barnish M, Morgan HM, Barnish J. The 2016 HIGH Heels: Health effects And  
19 psychosexual Benefits (HIGH HABITS) study: systematic review of reviews and  
20 additional primary studies. *BMC Public Health* 2017; 18: 37.
- 21 213. Office of the Premier. B.C. bans mandatory high heels in the workplace.  
22 Victoria, British Columbia, 7 April 2017.
- 23 214. Mitchell J, Berrie L, Johns R. *The Scottish National Party: transition to power*.  
24 Oxford: Oxford University Press; 2012.
- 25 215. Rehm J, Mathers C, Popova S, et al. Global burden of disease and injury and  
26 economic cost attributable to alcohol use and alcohol-use disorders. *Lancet* 2009;  
27 373: 2223-33.
- 28 216. Concato J, Shah N, Horwitz RJ. Randomized, controlled trials, observational  
29 studies, and the hierarchy of research designs. *N Engl J Med* 2000; 342:1887-92.
- 30 217. Bergqvist K, Åberg Yngwe M, Lundberg O. Understanding the role of welfare  
31 state characteristics for health and inequalities – an analytical review. *BMC Public*  
32 *Health* 2013; 13: 1234.
- 33 218. McKee M, Greer SL, Stuckler D. What will Donald Trump's presidency mean  
34 for health? A scorecard. *Lancet* 2017; 389: 748-54.
- 35 219. Daube M, Moodie R, McKee M. Towards a smoke-free world? Philip Morris  
36 International's new foundation is not credible. *Lancet* 2017; 390: 1722-4.
- 37 220. Yoon S, Lam T-H. The alcohol industry lobby and Hong Kong's zero wine and  
38 beer tax policy. *BMC Public Health* 2012; 12: 717.
- 39 221. Schafer P. Community-academic partnerships and social change. In  
40 O'Campo P, Dunn JR, editors. *Rethinking social epidemiology: towards a science of*  
41 *change*. Dordrecht: Springer Netherlands, 2011; pp. 285-304.
- 42 222. Semple S, Sweeting H, Demou E, et al. Characterising the exposure of prison  
43 staff to second-hand tobacco smoke. *Ann Work Expo Health* 2017; 61: 809-21.
- 44 223. Scottish Prison Service. Creating a smoke free prison environment. Available  
45 at:  
46 [http://www.sps.gov.uk/Corporate/News/Creating\\_a\\_Smoke\\_Free\\_Prison\\_Environment.aspx](http://www.sps.gov.uk/Corporate/News/Creating_a_Smoke_Free_Prison_Environment.aspx) [Accessed 12 October 2017].  
47  
48  
49  
50  
51  
52  
53  
54  
55  
56  
57  
58  
59  
60

**TABLES****Table 1. Conceptual search strategy**

|                                                                                                                                                                                                                                                                             |
|-----------------------------------------------------------------------------------------------------------------------------------------------------------------------------------------------------------------------------------------------------------------------------|
| ((democracy OR autocracy OR welfare regime OR welfare state OR welfare capitalism OR politics OR political tradition OR internationality OR globalization) AND (health OR health services OR population health OR public health OR health economics OR health expenditure)) |
|-----------------------------------------------------------------------------------------------------------------------------------------------------------------------------------------------------------------------------------------------------------------------------|

For peer review only

**Table 2. Table of study-level characteristics and results for welfare state**

| Serial number                       | Authors, publication year | Years of study | Level of analysis | Setting                                       | Political exposures        | Population health outcomes                           | Result category |
|-------------------------------------|---------------------------|----------------|-------------------|-----------------------------------------------|----------------------------|------------------------------------------------------|-----------------|
| <b>Studies from the 2010 review</b> |                           |                |                   |                                               |                            |                                                      |                 |
| 1                                   | Avendano et al, 2009      | 2004-2007      | Ecological        | 11 countries from 3 European regions          | Welfare regimes            | Chronic conditions, self-reported health, depression | Positive        |
| 2                                   | Bambra, 2005              | 1997-1999      | Ecological        | 18 OECD countries                             | Welfare regimes            | Health care index                                    | Positive        |
| 3                                   | Bambra, 2006              | 1980-1998      | Ecological        | 18 OECD countries                             | Welfare regimes            | Infant mortality                                     | Positive        |
| 4                                   | Bambra and Eikemo, 2009   | 2002-2004      | Individual        | 37,499 persons from 21 European countries     | Welfare regimes            | Self-reported health, long-standing illness          | Positive        |
| 5                                   | Bambra et al, 2009        | 1998-2004      | Individual        | 118,245 persons from 13 European countries    | Welfare regimes            | Self-rated health                                    | Inconclusive    |
| 6                                   | Burstrom et al, 2010      | 1999-2001      | Individual        | 28,485 persons from Italy, Sweden and Britain | Family policy models       | Self-rated health, limiting long-standing illness    | Positive        |
| 7                                   | Chung and Muntaner, 2006  | 1960-1994      | Ecological        | 19 wealthy OECD countries                     | Public sector medical care | Infant mortality rate, low birth weight,             | Positive        |

|    |                           |           |            |                                            |                                         |                                                       |              |
|----|---------------------------|-----------|------------|--------------------------------------------|-----------------------------------------|-------------------------------------------------------|--------------|
|    |                           |           |            |                                            |                                         | under-five mortality weight                           |              |
| 8  | Chung and Muntaner, 2007  | 1960-1998 | Ecological | 18 wealthy countries                       | Welfare regimes                         | Infant mortality rate, low birth weight               | Positive     |
| 9  | Conley and Springer, 2001 | 1960-1992 | Ecological | 19 OECD countries                          | Welfare regimes, welfare state spending | Infant mortality                                      | Positive     |
| 10 | Dahl et al, 2006          | 1970-2005 | Ecological | Up to 11 European countries                | Welfare regimes                         | Absolute and relative health inequalities             | Inconclusive |
| 11 | Eikemo et al, 2008        | 2002-2004 | Individual | 69, 821 persons from 23 European countries | Welfare regimes                         | Self-reported health, limiting longstanding illness   | Inconclusive |
| 12 | Eikemo et al, 2008        | 2002-2004 | Individual | 65, 065 persons from 21 European countries | Welfare regimes                         | Subjective poor health, limiting longstanding illness | Positive     |
| 13 | Elola et al, 1995         | 1990-1991 | Ecological | 17 Western European countries              | Health care system                      | Infant mortality, life expectancy                     | Positive     |
| 14 | Farfan-Portet et al, 2010 | 2001      | Individual | 5,729,859 persons in Belgium and Britain   | Welfare regimes                         | Self-reported health                                  | Inconclusive |
| 15 | Fayissa, 2001             | 1993      | Ecological | 34 sub-Saharan African countries           | Public health expenditure               | Infant mortality, child mortality                     | Positive     |

29

|    |                         |           |            |                                                             |                      |                                                                 |              |
|----|-------------------------|-----------|------------|-------------------------------------------------------------|----------------------|-----------------------------------------------------------------|--------------|
| 16 | Grosse et al, 2010      | 2004      | Individual | 38,122 persons from 24 European countries                   | Welfare regimes      | Perception of need for seeking primary health care              | Positive     |
| 17 | Karim, 2010             | 2003      | Ecological | 30 countries in Europe, North America, Australia and Asia   | Welfare regimes      | Infant mortality, life expectancy                               | Positive     |
| 18 | Klomp and de Haan, 2008 | 2000-2005 | Ecological | 101 low, middle and high income countries                   | Governance           | 19 mortality, disease, sickness indicators                      | Positive     |
| 19 | Lahelma and Arber, 1994 | 1985-1987 | Individual | Ca. 30,000 persons from Britain, Finland, Norway and Sweden | Welfare regimes      | Limiting long-standing illness                                  | Negative     |
| 20 | Lundberg et al, 2008    | 1950-2000 | Ecological | 18 OECD countries                                           | Family policy models | Infant mortality, mortality among those aged 30-59 and over 65  | Positive     |
| 21 | Menon-Johansson, 2005   | 2002      | Ecological | 149 countries                                               | Governance           | HIV prevalence                                                  | Positive     |
| 22 | Muntaner et al, 2006    | 1980-1995 | Individual | Sweden, Italy, and England and Wales (combined)             | Welfare regimes      | Mortality level per occupational class, population attributable | Inconclusive |

30

|    |                              |           |            |                                                                 |                           |                                                           |              |
|----|------------------------------|-----------|------------|-----------------------------------------------------------------|---------------------------|-----------------------------------------------------------|--------------|
|    |                              |           |            |                                                                 |                           | risk, index of dissimilarity                              |              |
| 23 | Nordenmark et al, 2006       | 1992-2001 | Individual | 3442 persons from Sweden, Ireland and Great Britain             | Unemployment benefit type | Psychological distress                                    | Positive     |
| 24 | Ouweneel, 2002               | 1980-1990 | Ecological | 42 'first-world, second-world and third-world' countries        | Social security system    | Self-rated health                                         | Inconclusive |
| 25 | Raphael and Bryant, 2004     | 1999      | Ecological | 5 countries (Canada, Denmark, Sweden, UK, US)                   | Welfare state spending    | Life expectancy                                           | Positive     |
| 26 | Rostila, 2007                | 2002-2003 | Individual | 36,489 persons in 20 European countries                         | Welfare regimes           | Self-rated health, life expectancy                        | Positive     |
| 27 | Sanders et al, 2009          | 1998-2002 | Individual | 12,888 persons in 4 countries (UK, Finland, Germany, Australia) | Welfare regimes           | Oral health                                               | Positive     |
| 28 | Sekine et al, 2009           | 1991-2003 | Individual | 17,801 persons in Britain, Finland and Japan                    | Welfare regimes           | The Short-Form 36: physical and mental health functioning | Positive     |
| 29 | Veenhoven and Ouweneel, 1995 | 1965-1985 | Ecological | Up to 97 rich and poor countries                                | Welfare state expenditure | Life expectancy                                           | Positive     |



31

|                                |                       |           |            |                                                               |                            |                                                                          |              |
|--------------------------------|-----------------------|-----------|------------|---------------------------------------------------------------|----------------------------|--------------------------------------------------------------------------|--------------|
| 30                             | Veenhoven, 2000       | 1980-1990 | Ecological | 40 countries                                                  | Welfare state expenditure  | Life expectancy, self-rated health                                       | Inconclusive |
| 31                             | Whitehead et al, 2000 | 1979-1996 | Individual | 80,792 persons from Britain and Sweden                        | Social benefit system      | Self-perceived health, limiting longstanding illness                     | Inconclusive |
| 32                             | Zambon et al, 2006    | 2001-2002 | Individual | 160,325 persons from 32 European and North American countries | Welfare regimes            | Self-reported health, well-being, health symptom load, health behaviours | Positive     |
| <b>Studies from our update</b> |                       |           |            |                                                               |                            |                                                                          |              |
| 33                             | Ades et al, 2013      | 2008-2012 | Ecological | 27 European Union countries                                   | Healthcare spending        | Cancer incidence and mortality                                           | Positive     |
| 34                             | Akinci et al, 2014    | 1990-2010 | Ecological | 19 Middle Eastern and North African countries                 | Healthcare spending        | Infant, under-5, and maternal mortality                                  | Positive     |
| 35                             | Bambra et al, 2014    | 2010      | Individual | 21,705 men and women from 27 European countries               | Welfare regime             | Self-rated health                                                        | Inconclusive |
| 36                             | Batniji et al, 2014   | 1980-2011 | Ecological | 22 Arab countries                                             | Governance                 | Mortality                                                                | Positive     |
| 37                             | Bentley et al, 2016   | 2001-2008 | Ecological | Australia and UK                                              | Housing benefit generosity | Mental health                                                            | Positive     |

32

|    |                             |            |            |                                                    |                                                                                                  |                                                                                  |              |
|----|-----------------------------|------------|------------|----------------------------------------------------|--------------------------------------------------------------------------------------------------|----------------------------------------------------------------------------------|--------------|
| 38 | Bradley et al, 2011         | 2009       | Ecological | 30 OECD countries                                  | Healthcare spending, social care spending                                                        | Life expectancy, low birth weight, maternal mortality, potential life years lost | Positive     |
| 39 | Brandt and Hank, 2014       | Up to 2009 | Individual | More than 13,000 people from 11 European countries | Welfare regimes                                                                                  | Self-rated health, job loss                                                      | Positive     |
| 40 | Bremberg, 2016              | 1990-2012  | Ecological | 28 OECD countries                                  | Family benefit spending, healthcare spending, government expenditure on research and development | Infant mortality                                                                 | Inconclusive |
| 41 | Copeland et al, 2015        | 1991-2010  | Individual | England (n = 217,514) and Sweden (n = 184, 428)    | Welfare regimes                                                                                  | Self-rated health, health inequalities                                           | Positive     |
| 42 | Corsi and Subramanian, 2014 | 1990-2012  | Ecological | 35 sub-Saharan African countries                   | Maternal and child health service coverage                                                       | Under-5 mortality                                                                | Positive     |
| 43 | Craveiro, 2017              | 2010-2011  | Individual | 53,615 individuals from 15 European countries      | Welfare regimes                                                                                  | Composite health measure derived from 3 indicators based on                      | Positive     |

33

|    |                            |           |            |                                                       |                                                             |                                        |              |
|----|----------------------------|-----------|------------|-------------------------------------------------------|-------------------------------------------------------------|----------------------------------------|--------------|
|    |                            |           |            |                                                       |                                                             | factor analysis, health inequalities   |              |
| 44 | Dahl and van der Wel, 2013 | 2005      | Individual | Around 245,000 individuals from 18 European countries | National social expenditure                                 | Self-rated health, health inequalities | Positive     |
| 45 | Deeming and Hayes, 2012    | 2000-2005 | Individual | Just under 30,000 individuals from OECD countries     | Welfare regimes                                             | Unhappiness                            | Positive     |
| 46 | Devaux, 2015               | 2006-2009 | Individual | Participants from 18 OECD countries                   | Health care system                                          | Health inequalities                    | Positive     |
| 47 | Dragano et al, 2010        | 2004-2006 | Individual | 9917 older individuals from 12 European countries     | Welfare regimes, indicators from the EU Labour Force Survey | Depression (EURO-D and CES-D)          | Positive     |
| 48 | Dujardin et al, 2011       | 2001      | Individual | 5729858 individuals from Belgium and Great Britain    | Home care policy system                                     | Health burden of care                  | Positive     |
| 49 | Elgar et al, 2011          | 2006      | Individual | 48641 adults from 33 rich and middle-income countries | Healthcare spending                                         | Homicide                               | Inconclusive |
| 50 | Engster and Stensöta,      | 1995-2005 | Individual | Participants from 20 OECD                             | Family policy regime: family                                | Child poverty and mortality            | Positive     |

34

|    |                             |           |            |                                                       |                                                                        |                          |              |
|----|-----------------------------|-----------|------------|-------------------------------------------------------|------------------------------------------------------------------------|--------------------------|--------------|
|    | 2011                        |           |            | countries                                             | cash and tax benefits, paid parenting leave, public child care support |                          |              |
| 51 | Esmaeli et al, 2011         | 1996-2004 | Ecological | 24 Islamic countries                                  | Healthcare spending                                                    | Life expectancy          | Inconclusive |
| 52 | Esser and Palme, 2010       | 2002-2005 | Individual | 13 OECD countries                                     | Pension system                                                         | Self-rated health, WHO-5 | Positive     |
| 53 | Foubert et al, 2014         | 2002-2004 | Individual | 213764 individuals from 57 countries                  | Welfare regimes                                                        | Self-rated health        | Positive     |
| 54 | Fritzell et al, 2012        | 2000-2005 | Individual | Randomly sampled British, Italian and Swedish mothers | Family policy model                                                    | Maternal health          | Negative     |
| 55 | Fritzell et al, 2013        | 1980-2005 | Ecological | Up to 25 countries per wave                           | Welfare regimes                                                        | Mortality                | Positive     |
| 56 | Gesthuizen et al, 2012      | 2002-2008 | Individual | Over 90,000 individuals from 32 European countries    | Healthcare spending, modernised labour market                          | Self-rated health        | Positive     |
| 57 | Gilligan and Skrepnek, 2015 | 1995-2010 | Ecological | 21 Eastern Mediterranean countries                    | Healthcare spending                                                    | Life expectancy          | Positive     |
| 58 | Glass et al, 2016           | 2006-2008 | Individual | 22 OECD countries                                     | Family policy                                                          | Happiness                | Positive     |
| 59 | Granados, 2010              | 1950-2000 | Ecological | 8 European countries                                  | Welfare regimes                                                        | Life expectancy,         | Inconclusive |

35

|    |                                     |           |            |                                                                             |                                                    |                                                   |              |
|----|-------------------------------------|-----------|------------|-----------------------------------------------------------------------------|----------------------------------------------------|---------------------------------------------------|--------------|
|    |                                     |           |            |                                                                             |                                                    | mortality,<br>tobacco<br>consumption              |              |
| 60 | Guarnizo-<br>Herreño et al,<br>2013 | 2009      | Ecological | 31 European<br>countries                                                    | Welfare<br>regimes                                 | Oral health                                       | Positive     |
| 61 | Harding et al,<br>2013              | 1971-2006 | Ecological | England and<br>Wales, Italy<br>and Finland                                  | Welfare<br>regimes                                 | Elder<br>mortality                                | Negative     |
| 62 | Hájek et al,<br>2012                | 1995-2008 | Ecological | 27 European<br>Union<br>countries                                           | Healthcare<br>spending                             | Life<br>expectancy,<br>standardised<br>death rate | Positive     |
| 63 | Hauck et al,<br>2012                | 1990-2012 | Ecological | 54 low-income<br>studies                                                    | Healthcare<br>spending                             | Life<br>expectancy                                | Inconclusive |
| 64 | Heijink et al,<br>2013              | 1996-2006 | Ecological | 14 Western<br>countries                                                     | Healthcare<br>spending                             | Avoidable<br>mortality                            | Positive     |
| 65 | Hoffman, 2011                       | 1980-2006 | Ecological | USA and<br>Denmark                                                          | Welfare<br>system                                  | Old-age<br>mortality                              | Negative     |
| 66 | Kuovo and<br>Räsänen,<br>2015       | 2010      | Individual | 10,046<br>individuals<br>from Finland,<br>Britain,<br>Germany and<br>Greece | Welfare<br>system                                  | Subjective<br>well-being                          | Positive     |
| 67 | Levecque et<br>al, 2011             | 2006-2007 | Individual | 41686 people<br>from 23<br>European<br>countries                            | Welfare<br>regimes,<br>welfare state<br>generosity | Depression<br>(CES-D)                             | Positive     |
| 68 | Levecque et<br>al, 2015             | 2006-2007 | Individual | 37076 people<br>from 20<br>European<br>countries                            | Migrant<br>integration<br>social policy            | Depression<br>(CES-D)                             | Inconclusive |
| 69 | Lin et al, 2014                     | 1996-2010 | Ecological | 149 countries                                                               | Governance                                         | Child<br>mortality                                | Positive     |

36

|    |                                       |           |                            |                                                       |                                                              |                                           |              |
|----|---------------------------------------|-----------|----------------------------|-------------------------------------------------------|--------------------------------------------------------------|-------------------------------------------|--------------|
| 70 | López-Casasnovas and Soley-Bori, 2014 | 1980-2010 | Ecological                 | 32 OECD countries                                     | Healthcare and social spending, healthcare system            | Health Human Development Index            | Positive     |
| 71 | McKinnon et al, 2016                  | 2006-2012 | Individual                 | Participants from 48 low- and middle-income countries | Maternal health service coverage                             | Neonatal mortality, health inequality     | Positive     |
| 72 | Maynard, 2016                         | 1985-2005 | Ecological                 | 74 developing countries                               | Healthcare spending                                          | Tuberculosis mortality                    | Positive     |
| 73 | Miething et al, 2013                  | 2000      | Individual                 | 19353 individuals from Sweden, East and West Germany  | Welfare regimes                                              | Self-rated health                         | Inconclusive |
| 74 | Minagawa, 2013                        | 1990-2009 | Ecological                 | 23 Eastern European countries                         | Healthcare spending                                          | Age-specific mortality, self-rated health | Positive     |
| 75 | Moor et al, 2013                      | 1981-1999 | Ecological                 | 47 European countries and regions                     | Welfare state generosity (Social Policy Indicators Database) | Life satisfaction                         | Positive     |
| 76 | Muldoon et al, 2011                   | 2001-2008 | Ecological                 | 136 United Nations countries                          | Healthcare spending                                          | Infant, child and maternal mortality      | Positive     |
| 77 | Muntaner et al, 2017                  | 2003-2010 | Household-level ecological | 27 European Union countries                           | Welfare regimes                                              | Self-rated health, chronic conditions     | Positive     |
| 78 | Nelson and Fritzell, 2014             | 1990-2009 | Ecological                 | 18 countries                                          | Minimum income benefits                                      | Mortality (life expectancy and age-       | Positive     |

1  
2  
3  
4  
5  
6  
7  
8  
9  
10  
11  
12  
13  
14  
15  
16  
17  
18  
19  
20  
21  
22  
23  
24  
25  
26  
27  
28  
29  
30  
31  
32  
33  
34  
35  
36  
37  
38  
39  
40  
41  
42  
43  
44  
45  
46  
47

37

|    |                             |           |            |                                                      |                                      |                                               |              |
|----|-----------------------------|-----------|------------|------------------------------------------------------|--------------------------------------|-----------------------------------------------|--------------|
|    |                             |           |            |                                                      |                                      | standardised death rates)                     |              |
| 79 | Novignon et al, 2012        | 1995-2010 | Ecological | 44 Sub-Saharan African countries                     | Healthcare spending                  | Life expectancy, death rate, infant mortality | Positive     |
| 80 | Olafsdottir, 2007           | 1998      | Individual | Participants from USA and Iceland                    | Welfare regimes, healthcare spending | Self-rated physical health, health inequality | Positive     |
| 81 | Olsen and Dahl, 2007        | 2003      | Individual | 38,472 individuals from 21 European countries        | Healthcare spending                  | Self-rated health                             | Positive     |
| 82 | Palència et al, 2014        | 2010      | Individual | 23782 men and 28655 women from 26 European countries | Gender equality policies             | Health inequality                             | Positive     |
| 83 | Pickett and Wilkinson, 2007 | 1998-2006 | Ecological | 23 rich countries                                    | Income equality                      | Child wellbeing                               | Positive     |
| 84 | Pinzón-Flórez et al, 2015   | 2000-2010 | Ecological | 154 countries                                        | Healthcare spending                  | Child and maternal mortality                  | Positive     |
| 85 | Platts, 2015                | 2000-2007 | Ecological | UK and Russia                                        | Welfare regimes                      | Self-rated health                             | Inconclusive |
| 86 | Ploubidis et al, 2012       | 2006-2007 | Individual | 33528 people from 14 European countries              | Welfare regimes, income equality     | Health in later life                          | Positive     |
| 87 | Popham et al, 2013          | 2006      | Ecological | 37 countries                                         | Welfare regimes                      | Life expectancy                               | Positive     |

38

|    |                            |           |            |                                        |                                                           |                                                       |              |
|----|----------------------------|-----------|------------|----------------------------------------|-----------------------------------------------------------|-------------------------------------------------------|--------------|
| 88 | Reeves et al, 2014         | 1995-2012 | Ecological | 21 European countries                  | Healthcare spending, social spending, pension expenditure | Tuberculosis control                                  | Positive     |
| 89 | Richter et al, 2012        | 2006      | Individual | 141091 adolescents from 32 countries   | Welfare regimes                                           | Subjective health, health inequality                  | Positive     |
| 90 | Rovny, 2011                | 1990-1999 | Ecological | 17 OECD countries                      | Family social policy                                      | Fertility                                             | Positive     |
| 91 | Sacker et al, 2011         | 1995-2001 | Ecological | Britain, Germany, Denmark and USA      | Welfare regimes                                           | Self-rated health                                     | Positive     |
| 92 | Sarti et al, 2013          | 2005      | Individual | Participants from European countries   | Welfare regimes                                           | Self-rated health, health inequality                  | Positive     |
| 93 | Shim, 2015                 | 1980-2010 | Ecological | 19 OECD countries                      | Social welfare expenditure                                | Infant mortality                                      | Inconclusive |
| 94 | Stavrova et al, 2011       | 1999-2009 | Individual | Participants from 28 OECD countries    | Unemployment benefit policies                             | Wellbeing among the unemployed                        | Inconclusive |
| 95 | Stuckler et al, 2010       | 1980-2005 | Ecological | Up to 18 European Union countries      | Social welfare spending                                   | All-cause mortality, cause-specific mortality         | Positive     |
| 96 | Van der Heuvel et al, 2013 | 1950-2000 | Ecological | Sweden, Netherlands, Canada, USA, Cuba | Welfare regimes, Redistributive welfare policy            | Infant mortality, low birth weight, under 5 mortality | Positive     |



39

|     |                            |            |            |                                                          |                                                                                                       |                                        |              |
|-----|----------------------------|------------|------------|----------------------------------------------------------|-------------------------------------------------------------------------------------------------------|----------------------------------------|--------------|
| 97  | Van der Wel et al, 2011    | 2005       | Ecological | 26 European countries                                    | Income equality, spending on active labour market policies, benefit generosity, employment protection | Social inequality in sickness          | Positive     |
| 98  | Van Tuyckom, 2011          | Up to 2008 | Individual | 24,846 people from 27 European Union countries           | Healthcare spending                                                                                   | Physical activity                      | Positive     |
| 99  | Vahid Shahidi et al, 2016  | 2012       | Individual | 22123 individuals from 23 countries with a welfare state | Welfare social policy                                                                                 | Self-rated health of the unemployed    | Positive     |
| 100 | Vöörmann and Helemäe, 2013 | 2010       | Individual | 5480 individuals from 4 Eastern European countries       | Welfare regimes                                                                                       | Self-rated health, health inequalities | Inconclusive |
| 101 | Wu and Chiang, 2007        | 2002       | Ecological | Taiwan and 21 comparison industrialized countries        | Income inequality, healthcare spending, public social expenditure                                     | Child mortality, under-five mortality  | Positive     |
| 102 | York and Bell, 2014        | 2005       | Ecological | Countries from the World Bank database with              | Healthcare spending, gender equality                                                                  | Self-reported life satisfaction (0-10) | Positive     |

1  
2  
3  
4  
5  
6  
7  
8  
9  
10  
11  
12  
13  
14  
15  
16  
17  
18  
19  
20  
21  
22  
23  
24  
25  
26  
27  
28  
29  
30  
31  
32  
33  
34  
35  
36  
37  
38  
39  
40  
41  
42  
43  
44  
45  
46  
47

40

|  |  |  |  |               |          |  |  |
|--|--|--|--|---------------|----------|--|--|
|  |  |  |  | relevant data | policies |  |  |
|--|--|--|--|---------------|----------|--|--|

For peer review only

41

**Table 3. Table of study-level characteristics and results for political tradition**

| Serial number                       | Authors, publication year   | Years of study | Level of analysis | Setting                                                 | Political exposures                                      | Population health outcomes                               | Result category |
|-------------------------------------|-----------------------------|----------------|-------------------|---------------------------------------------------------|----------------------------------------------------------|----------------------------------------------------------|-----------------|
| <b>Studies from the 2010 review</b> |                             |                |                   |                                                         |                                                          |                                                          |                 |
| 1                                   | Borrell et al, 2009         | 2000           | Individual        | 196,280 persons from 13 European countries              | Political tradition classification                       | Self-rated health                                        | Positive        |
| 2                                   | Cereseto and Waitzkin, 1986 | 1983-1984      | Ecological        | 123 countries, grouped by level of economic development | Political-economic system                                | Physical quality of life index                           | Positive        |
| 3                                   | Chung and Muntaner, 2006    | 1960-1964      | Ecological        | 19 OECD countries                                       | Voter partisanship                                       | Low birth weight, infant mortality, under-five mortality | Positive        |
| 4                                   | Correa and Namkoong, 1992   | 1980           | Ecological        | 116 countries with a population over 1 million          | Political conditions; political tradition classification | Life expectancy, mortality                               | Positive        |
| 5                                   | Espelt et al, 2008          | 2004           | Individual        | 16,901 persons in 9 European countries                  | Political tradition classification                       | Self-reported health, long-term illness                  | Positive        |
| 6                                   | Lena and London, 1993       | 1983           | Ecological        | Up to 84 peripheral and non-core                        | Political tradition classification                       | Infant mortality, child mortality, life expectancy       | Positive        |

42

|                                |                           |           |            |                                                |                                                                             |                                                                                             |          |
|--------------------------------|---------------------------|-----------|------------|------------------------------------------------|-----------------------------------------------------------------------------|---------------------------------------------------------------------------------------------|----------|
|                                |                           |           |            | nations                                        |                                                                             |                                                                                             |          |
| 7                              | London and Williams, 1990 | 1965-1970 | Ecological | Up to 110 periphery and semi-periphery nations | Political tradition classification                                          | Infant mortality, life expectancy                                                           | Positive |
| 8                              | Moon and Dixon, 1985      | 1970-1975 | Ecological | 116 nations                                    | Political ideology (left, right, centre)                                    | Physical Quality of Life Index: life expectancy, infant mortality                           | Positive |
| 9                              | Muntaner et al, 2002      | 1989-1992 | Ecological | 16 wealthy countries                           | Working class power, voter partisanship, time in power by different parties | Life expectancy, self-rated health, low birth weight, and age- and cause-specific mortality | Positive |
| 10                             | Navarro et al, 2003       | 1950-1998 | Ecological | 17 OECD countries                              | Working class power, voter partisanship                                     | Infant mortality, life expectancy, health inequalities                                      | Positive |
| 11                             | Navarro and Shi, 2001     | 1960-1996 | Ecological | 18 OECD countries                              | Political tradition classification, working class power                     | Infant mortality, health inequalities                                                       | Positive |
| 12                             | Navarro et al, 2006       | 1972-1996 | Ecological | 17 OECD countries                              | Voter partisanship, time in power by different parties                      | Infant mortality, life expectancy                                                           | Positive |
| <b>Studies from our update</b> |                           |           |            |                                                |                                                                             |                                                                                             |          |

43

|    |                            |           |            |                                  |                                                                                      |                                                   |              |
|----|----------------------------|-----------|------------|----------------------------------|--------------------------------------------------------------------------------------|---------------------------------------------------|--------------|
| 13 | Bosdriesz et al, 2015      | 1996-2010 | Ecological | 11 European Union countries      | Percentage of seats held by social democratic, socialist and other left-wing parties | Tobacco Control Scale                             | Positive     |
| 14 | Granados, 2010             | 1950-2000 | Ecological | 8 European countries             | Political tradition classification                                                   | Life expectancy, mortality, tobacco consumption   | Inconclusive |
| 15 | Huijts et al, 2010         | 2002-2006 | Individual | 29 European countries and Israel | Political tradition classification                                                   | Self-rated health                                 | Positive     |
| 16 | Lin et al, 2012            | 1970-2004 | Ecological | 119 less developed countries     | Political regime score from Polity IV                                                | Life expectancy                                   | Positive     |
| 17 | Mackenbach and McKee, 2013 | 1990-2009 | Ecological | 43 European countries            | Left-wing participation in government (share of seats)                               | Success in implementing effective health policies | Inconclusive |

**Table 4. Table of study-level characteristics and results for democracy**

| Serial number                   | Authors, publication year  | Years of study | Level of analysis | Setting                                        | Political exposures                               | Population health outcomes                                                      | Result category |
|---------------------------------|----------------------------|----------------|-------------------|------------------------------------------------|---------------------------------------------------|---------------------------------------------------------------------------------|-----------------|
| <b>Studies from 2010 review</b> |                            |                |                   |                                                |                                                   |                                                                                 |                 |
| 1                               | Adeyi, 1997                | 1989-1993      | Ecological        | 10 former Communist countries                  | Transition from Communism to capitalist democracy | Life expectancy, infant mortality, probability of dying between 15 and 65 years | Negative        |
| 2                               | Alvarez-Dardet, 2006       | 2000           | Ecological        | 23 former Communist countries                  | Democratic deficit                                | Life expectancy, infant mortality, maternal mortality                           | Positive        |
| 3                               | Baum and Lake, 2003        | 1967-1997      | Ecological        | 128 poor and non-poor countries                | Democracy (Polity III)                            | Female life expectancy                                                          | Positive        |
| 4                               | Besley and Kudamatsu, 2006 | 1962-2002      | Ecological        | Up to 160 countries transitioning to democracy | Democracy (Polity IV)                             | Life expectancy, infant mortality                                               | Positive        |
| 5                               | Franco, 2004               | 1998           | Ecological        | 170 high, medium and low-income countries      | Democracy (Freedom House)                         | Life expectancy, infant mortality, maternal mortality                           | Positive        |
| 6                               | Frey and Al-Roumi, 1999    | 1970-1990      | Ecological        | 87 developed and less-                         | Democracy (political rights)                      | Infant mortality, life expectancy                                               | Positive        |

1  
2  
3  
4  
5  
6  
7  
8  
9  
10  
11  
12  
13  
14  
15  
16  
17  
18  
19  
20  
21  
22  
23  
24  
25  
26  
27  
28  
29  
30  
31  
32  
33  
34  
35  
36  
37  
38  
39  
40  
41  
42  
43  
44  
45  
46  
47

45

|    |                            |           |            |                                                           |                                              |                                                                 |              |
|----|----------------------------|-----------|------------|-----------------------------------------------------------|----------------------------------------------|-----------------------------------------------------------------|--------------|
|    |                            |           |            | developed countries                                       | index and civil liberties)                   |                                                                 |              |
| 7  | Gauri and Khaleghian, 2002 | 1989-1997 | Ecological | 208 low and middle-income countries                       | Democracy (Polity IV)                        | Vaccine coverage for diphtheria, tetanus, pertussis and measles | Negative     |
| 8  | Ghobareh et al, 2004       | 2000      | Ecological | 179 countries in WHO                                      | Democracy (Polity IV, Freedom House)         | Health-adjusted life expectancy                                 | Positive     |
| 9  | Gizeles, 2009              | 1982-2000 | Ecological | 117 developed and developing countries                    | Democracy (Polity IV), state capacity        | AIDS infection rate                                             | Positive     |
| 10 | Houweling et al, 2005      | 1999      | Ecological | 43 developing countries in Asia, Africa and Latin America | Democracy (political rights index)           | Under five mortality rate                                       | Inconclusive |
| 11 | Kick et al, 1990           | 1970-1985 | Ecological | 63 developing countries                                   | Political democracy (political rights index) | Infant mortality                                                | Positive     |
| 12 | Klomp and de Haan, 2009    | 2000-2005 | Ecological | 171 countries with a population greater than 200,000      | Decree of democracy, political stability     | 19 national health indicators                                   | Positive     |
| 13 | Lake and Baum, 2001        | 1970-1992 | Ecological | Up to 110 developed                                       | Democracy (Polity III)                       | Life expectancy,                                                | Positive     |

|    |                           |           |            |                                                      |                                                                                               |                                                                   |              |
|----|---------------------------|-----------|------------|------------------------------------------------------|-----------------------------------------------------------------------------------------------|-------------------------------------------------------------------|--------------|
|    |                           |           |            | countries                                            |                                                                                               | infant mortality                                                  |              |
| 14 | Lena and London; 1993     | 1983      | Ecological | Up to 84 peripheral and non-core nations             | Level of democracy                                                                            | Infant mortality, child mortality, life expectancy                | Positive     |
| 15 | London and Williams; 1990 | 1965-1970 | Ecological | Up to 110 periphery and semi-periphery nations       | Level of political democracy                                                                  | Infant mortality, life expectancy                                 | Positive     |
| 16 | Moon and Dixon, 1985      | 1970-1975 | Ecological | 116 nations                                          | Level of political democracy, political stability                                             | Physical Quality of Life Index: life expectancy, infant mortality | Positive     |
| 17 | Navia and Zweifel, 2003   | 1990-1997 | Ecological | 188 democratic or dictatorial countries              | Democracy (yes or no, based on presence of elections)                                         | Fertility, child survival                                         | Positive     |
| 18 | Pillai and Gupta, 2006    | 2001      | Ecological | 129 developing countries                             | Democracy (human rights rating, political rights, and civil liberty, political terror scales) | 10 global monitoring indicators of women's reproductive health    | Positive     |
| 19 | Ross, 2006                | 1970-2000 | Ecological | 168 countries with a population greater than 200,000 | Democracy (Polity IV), years of democracy since 1900                                          | Child mortality, infant mortality                                 | Inconclusive |
| 20 | Rudra and Haggard, 2005   | 1975-1997 | Ecological | 57 less developed countries                          | Democracy (Polity IV)                                                                         | Infant mortality                                                  | Positive     |
| 21 | Safaei, 2006              | 2003      | Ecological | 118 autocratic,                                      | Democracy (Polity IV)                                                                         | Life expectancy,                                                  | Positive     |



47

|    |                                |           |            |                                         |                                                         |                                                                               |              |
|----|--------------------------------|-----------|------------|-----------------------------------------|---------------------------------------------------------|-------------------------------------------------------------------------------|--------------|
|    |                                |           |            | incoherent and democratic countries     |                                                         | mortality rate, child mortality rate                                          |              |
| 22 | Shandra et al, 2004            | 1980-1997 | Ecological | 59 developing countries                 | Level of political democracy                            | Infant mortality                                                              | Positive     |
| 23 | Shandra et al, 2010            | 1990-2005 | Ecological | 74 low income countries                 | Democracy (Polity IV)                                   | Infant mortality                                                              | Positive     |
| 24 | Stroup, 2007                   | 1980-2000 | Ecological | Up to 105 countries                     | Political Rights Index (Freedom House)                  | Life expectancy, child mortality                                              | Positive     |
| 25 | Tsai, 2006                     | 1975-1998 | Ecological | 119 developing countries                | Democracy (majority rule and political contention)      | Life expectancy, infant mortality under one year, infant mortality under five | Inconclusive |
| 26 | Wejnert, 2008                  | 1970-2005 | Ecological | 58 core and peripheral countries        | Democracy (Polity IV)                                   | Maternal care, fertility rate, maternal mortality, women life expectancy      | Inconclusive |
| 27 | Zweifel and Navia, 2000        | 1950-1990 | Ecological | 138 democratic or dictatorial countries | Democracy (yes or no, defined by presence of elections) | Infant mortality                                                              | Positive     |
|    | <b>Studies from our update</b> |           |            |                                         |                                                         |                                                                               |              |
| 28 | Batniji et al, 2014            | 1980-2011 | Ecological | 22 Arab countries                       | Extent of democracy                                     | Mortality                                                                     | Inconclusive |
| 29 | Burroway,                      | 1995-     | Individual | 52                                      | Democracy                                               | Child diarrhoea                                                               | Inconclusive |

48

|    |                             |               |            |                                                 |                                                                   |                                        |              |
|----|-----------------------------|---------------|------------|-------------------------------------------------|-------------------------------------------------------------------|----------------------------------------|--------------|
|    | 2016                        | 2008          |            | developing countries                            | (Polity IV)                                                       | and malnutrition                       |              |
| 30 | Chuang et al, 2013          | 1980-2009     | Ecological | 46 less-developed countries                     | Democracy (Polity IV)                                             | Infant mortality                       | Positive     |
| 31 | Chuang et al, 2013          | 1980-2009     | Ecological | 46 less-developed countries                     | Democracy (Polity IV)                                             | Under-5 mortality                      | Inconclusive |
| 32 | Dietrich and Bernhard, 2015 | 1980s to 2012 | Ecological | 88 countries that were not OECD members in 1984 | Democracy (Polity IV)                                             | Infant mortality, basic nutrition      | Inconclusive |
| 33 | Docherty and Kelly, 2010    | Not stated    | Individual | 30,816 individuals from 17 European countries   | Satisfaction with democracy on 0-10 scale                         | Self-reported happiness on 0-10 scales | Positive     |
| 34 | Fumagalli et al, 2013       | 1990-2007     | Ecological | 47 developing countries                         | Democracy (Polity IV), political competition                      | BMI                                    | Positive     |
| 35 | Hauck et al, 2012           | 1990-2012     | Ecological | 54 low-income studies                           | Democracy (Polity IV)                                             | Life expectancy                        | Positive     |
| 36 | Klenk et al, 2016           | 1950-2010     | Ecological | 64 countries from WHO mortality database        | Democratization                                                   | Mortality                              | Positive     |
| 37 | Krueger et al, 2015         | 2002-2004     | Individual | 313,554 individuals from 67 countries           | Democracy variable resulting from factor analysis of 7 indicators | Self-rated health                      | Positive     |
| 38 | Kudamatsu,                  | Up to         | Ecological | Sub-Saharan                                     | Democratization                                                   | Infant mortality                       | Positive     |

1  
2  
3  
4  
5  
6  
7  
8  
9  
10  
11  
12  
13  
14  
15  
16  
17  
18  
19  
20  
21  
22  
23  
24  
25  
26  
27  
28  
29  
30  
31  
32  
33  
34  
35  
36  
37  
38  
39  
40  
41  
42  
43  
44  
45  
46  
47

49

|    |                            |                                  |                     |                                        |                                              |                                                   |          |
|----|----------------------------|----------------------------------|---------------------|----------------------------------------|----------------------------------------------|---------------------------------------------------|----------|
|    | 2012                       | 2004                             |                     | African countries                      |                                              |                                                   |          |
| 39 | Mackenbach, 2013           | 1900-2008                        | Ecological          | European countries                     | Democracy (binary)                           | Life expectancy                                   | Positive |
| 40 | Mackenbach et al, 2013     | 1960-2008                        | Ecological          | European countries                     | Democratization                              | Life expectancy                                   | Positive |
| 41 | Mackenbach and McKee, 2013 | 1990-2009                        | Ecological          | 43 European countries                  | Democracy (+10 to -10)                       | Success in implementing effective health policies | Positive |
| 42 | Maynard, 2016              | 1985-2005                        | Ecological analysis | 74 developing countries                | Democracy (Freedom House)                    | Tuberculosis mortality                            | Positive |
| 43 | Minagawa, 2013             | 1990-2009                        | Ecological analysis | 23 Eastern European countries          | Freedom (Freedom House, Heritage Foundation) | Age-specific mortality, self-rated health         | Positive |
| 44 | Witvliet et al, 2013       | From 2000, end date not reported | Individual          | 72524 adults from 20 African countries | Transparency and freedom from corruption     | Self-rated health                                 | Positive |

50

**Table 5. Table of study-level characteristics and results for globalisation**

| Serial number                   | Authors, publication year | Years of study | Level of analysis | Setting                                          | Political exposures                                                                                      | Population health outcomes | Result category |
|---------------------------------|---------------------------|----------------|-------------------|--------------------------------------------------|----------------------------------------------------------------------------------------------------------|----------------------------|-----------------|
| <b>Studies from 2010 review</b> |                           |                |                   |                                                  |                                                                                                          |                            |                 |
| 1                               | Moore et al, 2006         | 2000           | Ecological        | 128 countries divided into 6 world-system blocks | National trade, world-system role                                                                        | Infant mortality           | Positive        |
| 2                               | Shandra et al, 2004       | 1980-1997      | Ecological        | 59 developing countries                          | Commodity concentration, multinational corporate penetration, international monetary fund conditionality | Infant mortality           | Negative        |
| 3                               | Shen and Williamson, 2001 | 1965-1991      | Ecological        | 82 less developed countries                      | Foreign trade, foreign investment, debt increase                                                         | Infant mortality           | Negative        |
| 4                               | Shen and Williamson, 1997 | 1960-1991      | Ecological        | 86 less developed countries                      | Foreign investment, debt dependency                                                                      | Child survival probability | Negative        |
| <b>Studies from our update</b>  |                           |                |                   |                                                  |                                                                                                          |                            |                 |
| 5                               | Bergh and Nilsson, 2010   | 1970-2005      | Ecological        | 92 high-, middle- and low-income                 | KOF index                                                                                                | Life expectancy            | Positive        |

1  
2  
3  
4  
5  
6  
7  
8  
9  
10  
11  
12  
13  
14  
15  
16  
17  
18  
19  
20  
21  
22  
23  
24  
25  
26  
27  
28  
29  
30  
31  
32  
33  
34  
35  
36  
37  
38  
39  
40  
41  
42  
43  
44  
45  
46  
47

51

|    |                                |            |                            |                                             |                                                                                                                                       |                                    |              |
|----|--------------------------------|------------|----------------------------|---------------------------------------------|---------------------------------------------------------------------------------------------------------------------------------------|------------------------------------|--------------|
|    |                                |            |                            | countries                                   |                                                                                                                                       |                                    |              |
| 6  | Bozorgmehr and Sebastian, 2014 | 1990-2010  | Ecological                 | 22 high-burden tuberculosis countries       | World Trade Organization membership status and duration, trade as a percentage of GDP, Economic Freedom of the World Index, KOF Index | Tuberculosis incidence             | Inconclusive |
| 7  | Chuang et al, 2013             | 1980-2009  | Ecological                 | 46 less-developed countries                 | Debt, foreign investment                                                                                                              | Infant mortality                   | Inconclusive |
| 8  | Chuang et al, 2013             | 1980-2009  | Ecological                 | 46 less-developed countries                 | Debt, foreign investment                                                                                                              | Under-5 mortality                  | Inconclusive |
| 9  | Costa Font and Mas, 2016       | 1989-2005  | Ecological                 | 26 countries                                | KOF Index, CSGR Index                                                                                                                 | Obesity prevalence, caloric intake | Negative     |
| 10 | Cross et al, 2009              | Not stated | Individual                 | UK, Spain, Kenya and Uganda                 | Localised or globalised food supply system                                                                                            | Health-related quality of life     | Positive     |
| 11 | De Vogli et al, 2014           | 1980-2008  | Ecological                 | 127 low-, middle- and high-income countries | KOF Index                                                                                                                             | BMI                                | Negative     |
| 12 | Estimé et al, 2014             | 2005-2010  | Household-level ecological | Pacific nations                             | Food imports                                                                                                                          | Obesity                            | Negative     |
| 13 | Fan and Faioso Le'au, 2015     | Up to 2014 | Ecological                 | Independent and American                    | Westernisation                                                                                                                        | Life expectancy, neonatal and      | Negative     |

52

|    |                                 |               |            |                                                                           |                                                                                                                                                                     |                                                                                                                                                                                                                                   |              |
|----|---------------------------------|---------------|------------|---------------------------------------------------------------------------|---------------------------------------------------------------------------------------------------------------------------------------------------------------------|-----------------------------------------------------------------------------------------------------------------------------------------------------------------------------------------------------------------------------------|--------------|
|    |                                 |               |            | Samoa                                                                     |                                                                                                                                                                     | child mortality,<br>measles<br>immunisation,<br>diabetes<br>mortality,<br>cancer<br>mortality,<br>cerebrovascular<br>disease<br>mortality, heart<br>disease<br>mortality,<br>pneumonia<br>mortality,<br>overweight and<br>obesity |              |
| 14 | Gerring and<br>Thacker,<br>2008 | 1960-<br>1999 | Ecological | All countries<br>with<br>available<br>data                                | Open<br>international<br>trade policies,<br>low-inflation<br>macroeconomic<br>environments,<br>market-oriented<br>property rights,<br>GATT and<br>WTO<br>membership | Infant mortality                                                                                                                                                                                                                  | Positive     |
| 15 | Goryakin et<br>al, 2015         | 1991-<br>2009 | Individual | Up to 887,00<br>women in 56<br>low- and<br>middle-<br>income<br>countries | KOF Index                                                                                                                                                           | Overweight and<br>obesity                                                                                                                                                                                                         | Negative     |
| 16 | Hauck et al,<br>2012            | 1990-<br>2012 | Ecological | 54 low-<br>income                                                         | Terms of<br>international                                                                                                                                           | Life expectancy                                                                                                                                                                                                                   | Inconclusive |

|    |                          |            |            |                                           |                                                     |                                                                                |              |
|----|--------------------------|------------|------------|-------------------------------------------|-----------------------------------------------------|--------------------------------------------------------------------------------|--------------|
|    |                          |            |            | studies                                   | trade, foreign investment, debt service and relief  |                                                                                |              |
| 17 | Jolly et al, 2013        | 2002       | Ecological | 27 Latin American and Caribbean countries | Net food import                                     | Obesity                                                                        | Negative     |
| 18 | Jorgenson, 2009          | 1980-2000  | Ecological | Less-developed countries                  | Foreign direct investment                           | Water pollution                                                                | Negative     |
| 19 | Jorgenson, 2009          | 1980-2000  | Ecological | Less-developed countries                  | Foreign direct investment, export intensity         | Water pollution                                                                | Negative     |
| 20 | Levine and Rothman, 2006 | Up to 1990 | Ecological | Up to 130 countries                       | Economic openness                                   | Infant mortality, under-5 mortality, anthropometric measures of child stunting | Inconclusive |
| 21 | Martens et al, 2010      | Up to 2008 | Ecological | Global, subject to data availability      | Maastricht Globalization Index                      | Infant mortality, under-5 mortality, adult mortality                           | Positive     |
| 22 | Maynard, 2015            | 2000-2010  | Ecological | Up to 85 low- and middle-income countries | IGTA membership and status, trade, imports, exports | Youth smoking rates (Global Youth Tobacco Survey)                              | Negative     |
| 23 | Maynard, 2016            | 1985-2005  | Ecological | 74 developing countries                   | Debt, trade dependency                              | Tuberculosis mortality                                                         | Inconclusive |
| 24 | Milner et al, 2011       | 1980-2006  | Ecological | 35 countries                              | A globalisation index                               | Suicide rate                                                                   | Negative     |

|    |                                |            |            |                                  | developed for the study                      |                                                    |              |
|----|--------------------------------|------------|------------|----------------------------------|----------------------------------------------|----------------------------------------------------|--------------|
| 25 | Mukherjee and Krieckhaus, 2011 | 1970-2007  | Ecological | 132 countries                    | Economic, political and social globalisation | Infant mortality, life expectancy, child mortality | Positive     |
| 26 | Oberlander et al, 2017         | 1970-2011  | Ecological | 70 countries                     | Social globalisation, trade openness         | Nutritional health                                 | Inconclusive |
| 27 | Oster, 2010                    | Up to 2007 | Ecological | UN countries with available data | Export activity                              | HIV                                                | Negative     |
| 28 | Owen and Wu, 2007              | 1960-1995  | Ecological | 219 countries                    | Openness to trade                            | Life expectancy, infant mortality                  | Positive     |

## FIGURE LEGENDS

**Figure 1.** Accumulation of evidence on the political determinants of population health over time.

**Figure 2.** PRISMA 2009 flow diagram.



1  
2  
3  
4  
5  
6  
7  
8  
9  
10  
11  
12  
13  
14  
15  
16  
17  
18  
19  
20  
21  
22  
23  
24  
25  
26  
27  
28  
29  
30  
31  
32  
33  
34  
35  
36  
37  
38  
39  
40  
41  
42  
43  
44  
45  
46  
47  
48  
49  
50  
51  
52  
53  
54  
55  
56  
57  
58  
59  
60

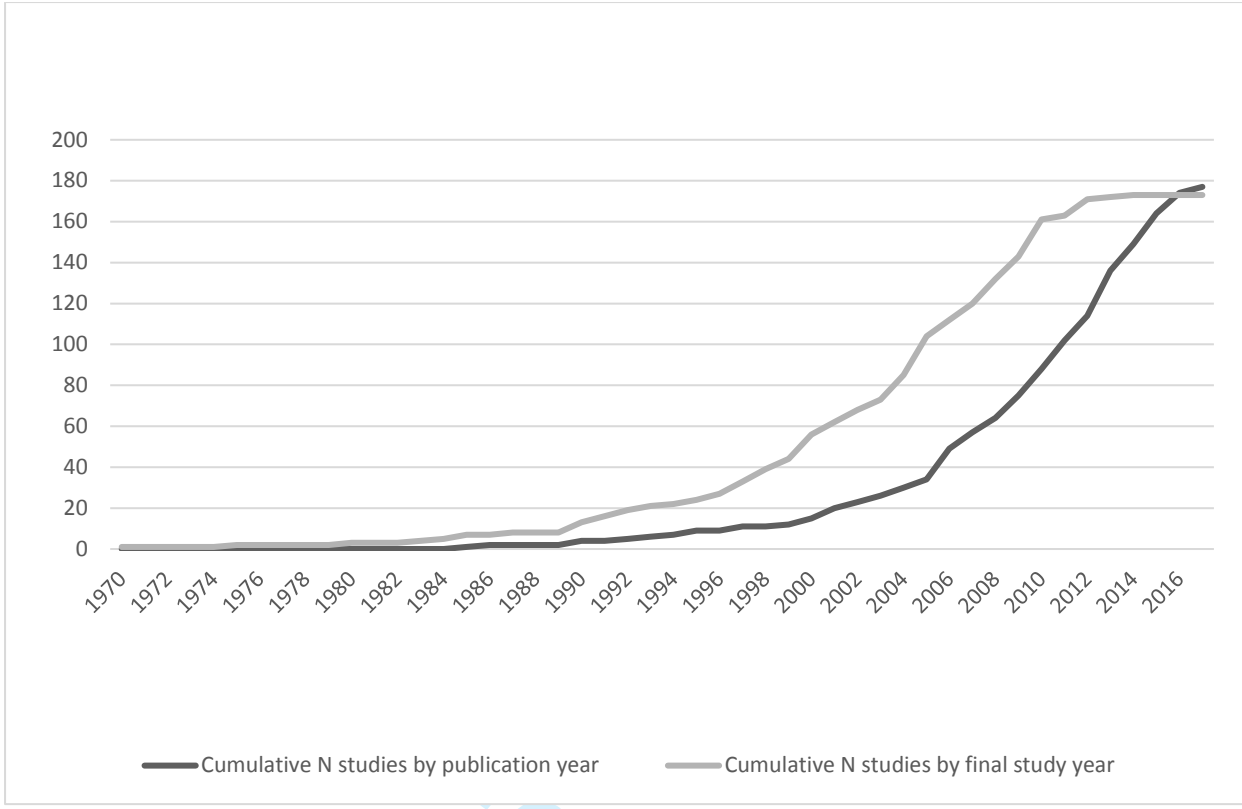

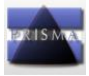

## PRISMA 2009 Flow Diagram

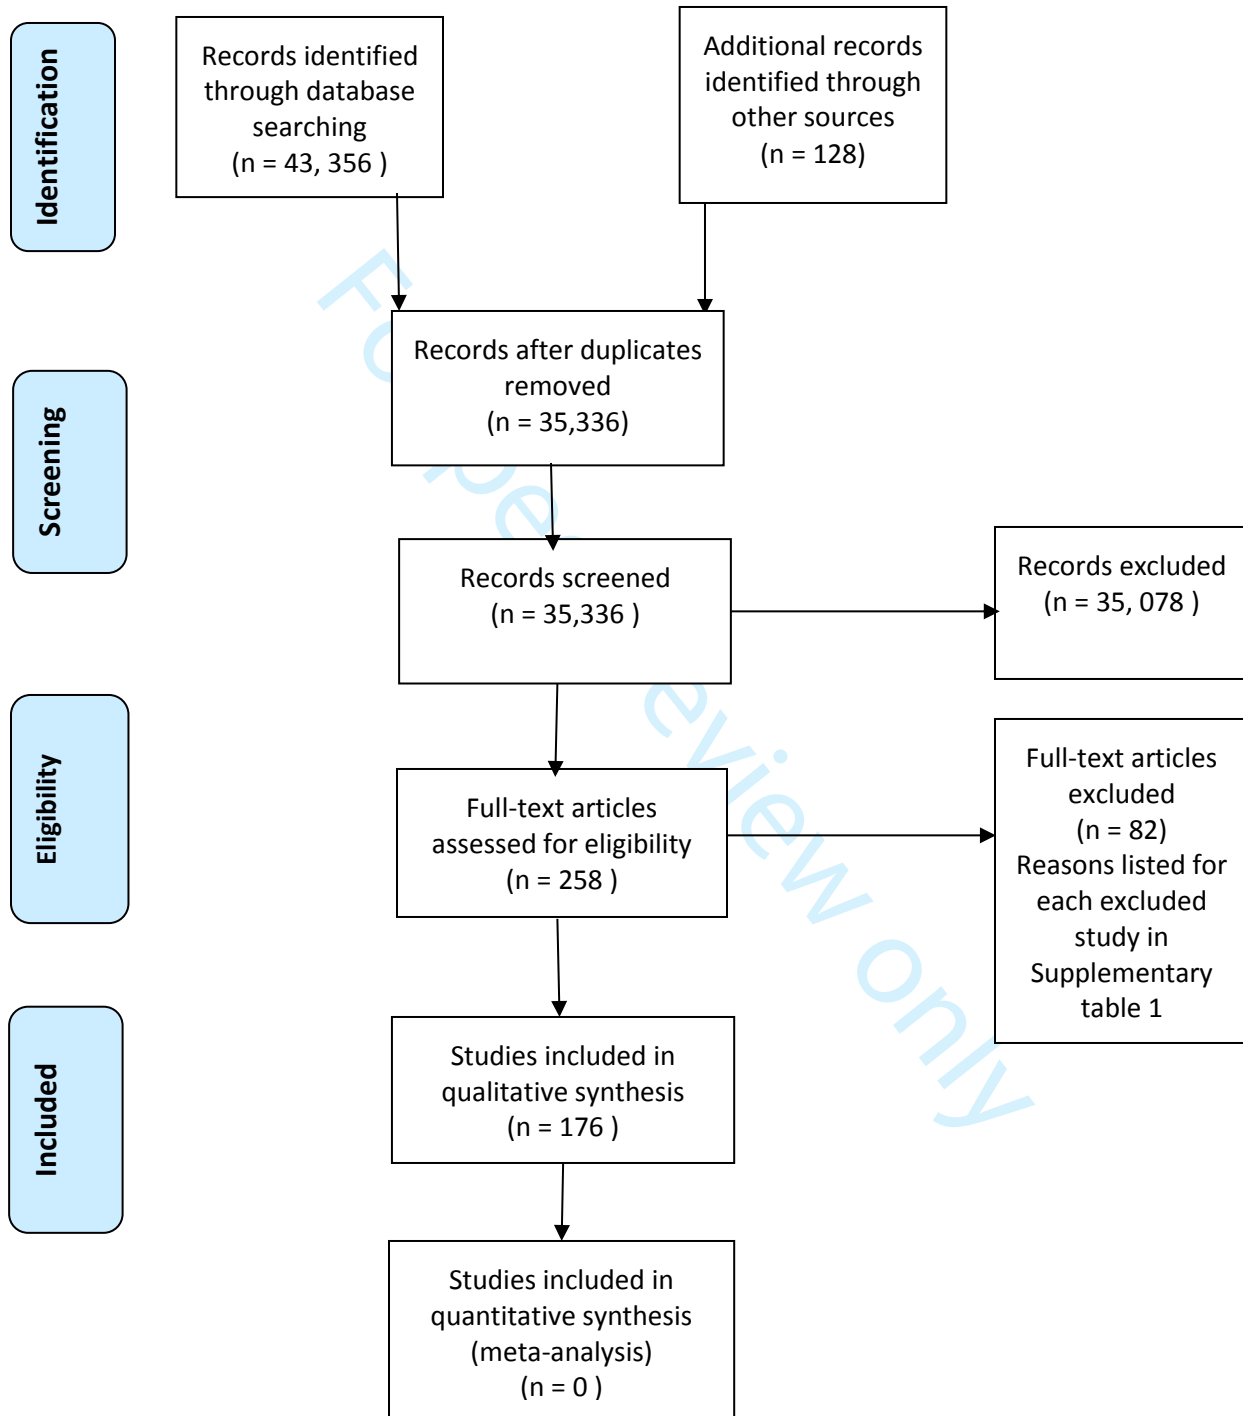

From: Moher D, Liberati A, Tetzlaff J, Altman DG, The PRISMA Group (2009). Preferred Reporting Items for Systematic Reviews and Meta-Analyses: The PRISMA Statement. PLoS Med 6(7): e1000097. doi:10.1371/journal.pmed1000097

For more information, visit [www.prisma-statement.org](http://www.prisma-statement.org).

For peer review only - <http://bmjopen.bmj.com/site/about/guidelines.xhtml>

**Supplementary file 1. List of all publications excluded at full-text screening, with reasons**

1. Abbott P, Wallace C. Exploring economic and social transformations in post-Soviet Russia, Ukraine and Belarus. *Eur Societies* 2010; 12: 653-74. No eligible comparisons.
2. Aggarwal S. 2010-2012 global health care reforms and their impact on pricing, access and health outcomes strategy. *Value Health* 2012; 15(7): A291. Abstract only.
3. Aldabe B, Anderson R, Lyly-Yrjänäinen, et al. Contribution of material, occupational, and psychosocial factors in the explanation of social inequalities in health in 28 countries in Europe. *J Epidemiol Community Health* 2011; 65: 1123-31. No eligible exposures.
4. Alsan M, Bloom DE, Canning D. The effect of population health on foreign direct investment inflows to low-and middle-income countries. *World Dev* 2006; 34: 613-30. No eligible comparisons.
5. Alves S. Welfare state changes and outcomes – the cases of Portugal and Denmark from a comparative perspective. *Soc Pol Adm* 2015; 49: 1-23. Study design.
6. Amouzou A, Kozuki N, Gwatkin DR. Where is the gap? The contribution of disparities within developing countries to global inequalities in under-five mortality. *BMC Public Health* 2014; 14: 216. No eligible exposures.
7. Arán-Matero D, Amico P, Arán-Fernandez C, et al. Levels of spending and resource allocation to HIV programs and services in Latin America and the Caribbean. *PLoS ONE* 2011; 6: e22373. No eligible comparisons.
8. Arnold RG, Heyworth J, Sáez AE, et al. The status of water and sanitation among Pacific Rim nations. *Rev Environ Health* 2011; 26: 17-30. No eligible comparisons.
9. Atikeler K, Piniakho O. Pricing and reimbursement policies of Turkey and Ukraine. *Value in Health* 2015; 18(7): A573. Abstract only.
10. Azemar C, Desbordes R. Public governance, health and foreign direct investment in sub-Saharan Africa. *J Afr Econ* 2009; 18: 667-709. No eligible comparisons.
11. Balaj M, McNamara CL, Eikemo TA, et al. The social determinants of inequalities in self-reported health in Europe: findings from the European social survey (2014) special module on the social determinants of health. *Eur J Public Health* 2017; 27: 107-14. No eligible comparisons.
12. Basch CH, Samuel L, Ethan D. Obesity, diabetes and heart disease: effects of globalization on population health, preventive efforts, and the importance of social change. *Int J Health Promot Educ* 2013; 51: 185-97. Study design.
13. Basu S, McKee M, Galea G, et al. Relationship of soft drink consumption to global overweight, obesity, and diabetes: a cross-national analysis of 75 countries. *Am J Public Health* 2013; 103: 2071-7. No eligible exposures.
14. Bayati M, Akbarian R, Kavosi Z. Determinants of life expectancy in eastern mediterranean region: a health production function. *Int J Health Policy Manag* 2013; 1: 57-61. No relevant comparisons.
15. Beckfield J, Olafsdottir S, Bakhtiari E. Health inequalities in global context. *Am Behav Sci* 2013; 57: 1014-39. No eligible comparisons.
16. Bernard S, Hotte L, Winer SL. Democracy, inequality and the environment when citizens can mitigate health consequences of pollution privately or act collectively. *Eur J Polit Econ* 2014; 34: 142-56. Study design.
17. Borrell C, Morrison J, Burstrom B, et al. Comparison of health policy documents of European cities: are they oriented to reduce inequalities in health? *J Public Health Policy* 2013; 34: 100-20. Study design.
18. Brady D, Marquandt S, Gauchat G, et al. Path dependency and the politics of socialized health care. *J Health Politics Pol Law* 2016; 41: 355-92. No eligible outcomes.

19. Burstrom B, Whitehead M, Clayton S, et al. Health inequalities between lone and couple mothers and policy under different welfare regimes – the example of Italy, Sweden and Britain. *Soc Sci Med* 2010; 70: 912–20. Duplicate.
20. Carbone G. Do new democracies deliver social welfare? Political regimes and health policy in Ghana and Cameroon. *Democratization* 2012; 19(2): 157-83. No relevant outcomes.
21. Chauvel L, Leist AK. Socioeconomic hierarchy and health gradient in Europe: the role of income inequality and of social origins. *Int J Equity Health* 2015; 14: 132. No eligible exposures.
22. Clark SE, Hawkes C, Murphy SM, et al. Exporting obesity: US farm and trade policy and the transformation of the Mexican consumer food environment. *Int J Occupat Environ Health* 2012; 18: 54-64. No eligible comparisons.
23. Christiansen NV, Kahlmeier S, Racioppi F. Sport promotion policies in the European Union: results of a contents analysis. *Scand J Med Sci Sports* 2014; 24: 428-38. Study design.
24. Chuang K-Y, Sung P-W, Chang C-J, et al. Political and economic characteristics as moderators of the relationship between health services and infant mortality in less-developed countries. *J Epidemiol Community Health* 2013; 67: 1006-12. Duplicate.
25. Cross P, Edwards RT, Nyeko P, et al. The potential impact on farmer health of enhanced export horticultural trade between the U.K. and Uganda. *Int J Environ Res Public Health* 2009; 6: 1539-56. No eligible comparisons.
26. De Andrade LOM, Pellegrini Filho A, Solar O, et al. Social determinants of health, universal health coverage, and sustainable development.: case studies from Latin American countries. *Lancet* 2015; 385: 1343-51. Study design.
27. De Vogli R, Kouvonen A, Gimeno D. 'Globesization': ecological evidence on the relationship between fast food outlets and obesity among 26 advanced economies. *Crit Public Health* 2011; 21: 395-402. No eligible exposures.
28. Docherty WJ, Mendenhall TJ, Berge JM. The Families and Democracy and Citizen Health Care Project. *J Marital Family Ther* 2010; 36: 389-402. No relevant comparisons.
29. Etherington D, Ingold J. Welfare to work and the inclusive labour market: a comparative study of activation policies for disability and long-term sickness claimants in the UK and Denmark. *J Eur Soc Policy* 2012; 22(1): 30-44. No eligible outcomes.
30. Elgar FJ, Davis CG, Wohl MJ, et al. Social capital, health and life satisfaction in 50 countries. *Health Place* 2011; 17, 1044-53. No eligible exposures.
31. Fazel S, Geddes JR, Kushel M. The health of homeless people in high-income countries: descriptive epidemiology, health consequences, and clinical and policy recommendations. *Lancet* 2014; 384, 1529-40. Not primary research.
32. Ferrarini T, Sjöberg O. Social policy and health: transition countries in a comparative analysis. *Int J Soc Welfare* 2010; 19: S60-88. Study design.
33. Friel S, Gleeson D, Thow A-M, et al. A new generation of trade policy: potential risks to diet-related health from the trans pacific partnership agreement. *Global Health* 2013; 9: 46. Study design.
34. Gregorio LE, Gregorio DI. Polity and health care expenditures: the association among 159 nations. *J Epidemiol Global Health* 2013; 3: 49-57. No eligible outcomes.
35. Gustafsson N-KJ, Ramstedt MR. Changes in alcohol-related harm in Sweden after increasing alcohol import quotas and a Danish tax decrease - an interrupted time-series analysis for 2000-2007. *Int J Epidemiol* 2011; 40, 432-40. No eligible comparisons.
36. Habibov NN, Afandi EN. Self-rated health and social capital in transitional countries: multilevel analysis of comparative surveys in Armenia, Azerbaijan and Georgia. *Soc Sci Med* 2011; 72: 1993-204. No eligible exposures.

- 1
- 2
- 3 37. Habibov N. Who wants to redistribute? An analysis of 14 post-Soviet nations. *Soc*
- 4 *Policy Admin* 2013; 47: 262-86. No eligible outcomes.
- 5 38. Harding R, Stasavage D. What democracy does (and doesn't do) for basic services:
- 6 school fees, school inputs, and African elections. *J Politics* 2013; 76: 229-45. No
- 7 eligible outcomes.
- 8 39. Herwartz H, Theilen B. Health care and ideology: a reconsideration of political
- 9 determinants of public healthcare funding in the OECD. *Health Econom* 2014; 23,
- 10 225-40. No eligible outcomes.
- 11 40. Herwartz H, Theilen B. Partisan influence on social spending under market
- 12 integration, fiscal pressure and institutional change. *Eur J Polit Econ* 2014; 34, 409-
- 13 24. No eligible outcomes.
- 14 41. Hicken A, Kollman K, Simmons JW. Party system nationalization and the provision of
- 15 public health services. *Polit Sci Res Meth* 2016; 4: 573-94. No eligible exposures.
- 16 42. Higo M, Khan HTA. Global population aging: unequal distribution of risks in later life
- 17 between developed and developing countries. *Glob Soc Policy* 2015; 15(2): 146-66.
- 18 Study design.
- 19 43. Hogan MC, Foreman KJ, Naghavi M, et al. Maternal mortality for 181 countries,
- 20 1880-2008: a systematic analysis of progress towards Millennium Development Goal
- 21 5. *Lancet* 2010; 375, 1609-23. Study design.
- 22 44. Huber E, Mustillo T, Stephens JD. Politics and social spending in Latin America. *J*
- 23 *Polit* 2008; 70: 420-36. No eligible outcomes.
- 24 45. James PD, Wilkins R, Detsky AS, et al. Avoidable mortality by neighbourhood
- 25 income in Canada: 25 years after the establishment of universal health insurance. *J*
- 26 *Epidemiol Community Health*. 2007, 61: 287-96. No eligible comparisons.
- 27 46. Jensen C. Two sides of the same coin? Left-wing governments and labour unions as
- 28 determinants of public spending. *Socioeconom Rev* 2012; 10: 217-40. No eligible
- 29 outcomes.
- 30 47. Jensen C. Marketization via compensation: health care and the politics of the right in
- 31 advanced industrialized nations. *Br J Polit Sci* 2011; 41: 907-26. Study design.
- 32 48. Kaufman RR, Segura-Ubiergo A. Globalization, domestic politics and social spending
- 33 in Latin America: a time-series cross-section analysis, 1973-1997. *Dados* 2001; 44:
- 34 435-79. No eligible outcomes.
- 35 49. Kawachi I. Globalization and workers' health. *Ind. Health* 2008; 46: 421-23. Study
- 36 design.
- 37 50. Kawiorska D. Healthcare in the light of the concept of welfare state regimes:
- 38 comparative analysis of EU member states. *Oeconomia Coperanica* 2016; 7: 187-
- 39 206. No eligible outcomes.
- 40 51. Korda RJ, Butler JR, Clements MS, et al. Differential impacts of health care in
- 41 Australia: trend analysis of socioeconomic inequalities in avoidable mortality. *Int J*
- 42 *Epidemiol*. 2007; 36: 157-165. No eligible comparisons.
- 43 52. Koutsogeorgou E, Nyqvist F, Nygård M, et al. Social capital and self-rated health
- 44 among older adults: a comparative analysis of Finland, Poland and Spain. *Ageing*
- 45 *Soc* 2015; 35: 653-67. No eligible exposures.
- 46 53. Levecque K, van Rossem R, Ronda E, et al. Depression in different welfare state
- 47 regimes in Europe: the role of attitudes towards state responsibility for an adequate
- 48 standard of living. *J Epidemiol Community Health* 2011; 65: A126. Abstract only.
- 49 54. Liang LL, Mirelman AJ. An assessment of socio-political determinants and
- 50 international aid for government health expenditures. *Soc Sci Med* 2014; 114: 161-8.
- 51 No eligible outcomes.
- 52 55. McMichael AJ. Globalization, climate change, and human health. *N Engl J Med* 2013;
- 53 368: 1335-43. Study design.
- 54 56. Mackenbach JP. Cultural values and population health: a quantitative analysis of
- 55 variations in cultural values, health behaviours and health outcomes among 42
- 56 European countries. *Health Place* 2014; 28: 116-32. No eligible exposures.
- 57
- 58
- 59
- 60

- 1
  - 2
  - 3
  - 4
  - 5
  - 6
  - 7
  - 8
  - 9
  - 10
  - 11
  - 12
  - 13
  - 14
  - 15
  - 16
  - 17
  - 18
  - 19
  - 20
  - 21
  - 22
  - 23
  - 24
  - 25
  - 26
  - 27
  - 28
  - 29
  - 30
  - 31
  - 32
  - 33
  - 34
  - 35
  - 36
  - 37
  - 38
  - 39
  - 40
  - 41
  - 42
  - 43
  - 44
  - 45
  - 46
  - 47
  - 48
  - 49
  - 50
  - 51
  - 52
  - 53
  - 54
  - 55
  - 56
  - 57
  - 58
  - 59
  - 60
57. Mackenbach JP, Karanikolos M, Lopez Bernal J, et al. Why did life expectancy in Central and Eastern Europe suddenly improve in the 1990s? An analysis by cause of death. *Scand J Public Health* 2015; 43: 796-801. No eligible exposures.
58. Marmot M, Allen J, Bell R, et al. WHO European review of social determinants of health and the health. *Lancet* 2012; 380: 1011-29. Study design.
59. Marten R, McIntyre D, Travassos C, et al. An assessment of progress towards universal health coverage in Brazil, Russia, India, China, and South Africa (BRICS). *Lancet* 2014; 384: 2164-71. Study design.
60. Minicuci N, León Díaz EM, Gómez León M, et al. Disability-free life expectancy: a cross-national comparison among Bulgarian, Italian and Latin American older population. *J Aging Health* 2011; 23: 629-81. No eligible political variables.
61. Moene KO, Wallerstein M. Earnings inequality and welfare spending – a disaggregated analysis. *World Polit* 2003; 55: 485–516. No eligible outcomes.
62. Molina-Mula J, de Pedro-Gómez JE. Impact of the politics of austerity in the quality of healthcare: ethical advice. *Nurs Philosoph* 2013; 14: 53-60. Study design.
63. Moller S, Misra J, Strader E. A cross-national look at how welfare states reduce inequality. *Sociol Compass* 2013; 7(2): 135-46. Study design.
64. Mukhopadhyay K, Chaudhuri S. Economic liberalisation, gender wage inequality and welfare. *J Internat Econ Dev* 2013; 22: 1214-39. No relevant outcomes.
65. Muntaner C. Democracy, authoritarianism, political conflict and population health: a global, comparative, and historical approach. *Soc Sci Med* 2013; 86: 107-12. Study design.
66. Muntaner C, Borrell C, Solà J, et al. Class relations and all-cause mortality: a test of Wright's social class scheme using the Barcelona 2000 Health Interview Survey. *Int J Health Serv* 2011; 41: 431-58. No relevant comparisons.
67. Muntaner C, Benach J, Chung H, et al. Welfare state, labour market inequalities and health. In a global context: an integrated framework. *SESPAS Report 2010. Gaceta Sanitaria* 2010; 24: 56-61. Study design.
68. Muntaner C, Chung H, Solar O, et al. A macro-level model of employment relations and health inequalities. *Int J Health Serv* 2010; 40(2): 215-21. Study design.
69. Nyquist F, Nygård M. Is the association between social capital and health robust across the Nordic regions? Evidence from a cross-sectional survey of older adults. *Int J Soc Welfare* 2013; 22(2): 119-29. No eligible exposures.
70. Or Z, Cases C, Lisac M, et al. Are health problems systemic? Politics of access and choice under Beveridge and Bismarck systems? *Health Econom Policy Law* 2010; 5: 269-93. Study design.
71. Raine KD. Obesity epidemics: inevitable outcome of globalization or preventable public health challenge? *Int J Public Health* 2012; 57: 35-6. Study design.
72. Razzak JA, Khan UR, Azam I, et al. Health disparities between Muslim and non-Muslim countries. *East Mediterr Health J* 2011; 18: 654-64. No eligible exposures.
73. Reeves A, McKee M, Basu S, et al. The political economy of austerity and healthcare: cross-national analysis of expenditure changes in 27 European nations, 1995-2011. No eligible outcomes.
74. Simons AMW, Groffen DAI, Bosma H. Socio-economic inequalities in all-cause mortality in Europe: an exploration of the role of heightened social mobility. *Eur J Public Health* 2013; 23: 1010-2. No eligible exposures.
75. Vågerö D. The East-West health divide in Europe: growing and shifting eastwards. *J Soc Pol Stud* 2010; 8(3): 319-30. Study design.
76. Victora CG, Barros AJD, Axelson H, et al. How changes in coverage affect equity in maternal and child health interventions in 35 Countdown to 2015 countries: an analysis of national surveys. *Lancet* 2012; 380: 1149-56. No eligible exposures.
77. Wahrendorf M, Reinhardt JD, Siegrist J. Relationships of disability with age among adults aged 50 to 85: evidence from the United States, England and Continental Europe. *PLoS ONE* 2013; 8: e71893. No eligible exposures.

- 1
- 2
- 3 78. Wang Y, Lim H. The global childhood obesity epidemic and the association between
- 4 socio-economic status and childhood obesity. *Int Rev Psychiatr* 2012; 24: 176-88. No
- 5 eligible exposures.
- 6 79. Wilkinson RG, Pickett K. *The spirit level: why equality is better for everyone*. London:
- 7 Penguin; 2010. Study design.
- 8 80. Wismar M, McQueen D, Lin V, et al. Rethinking the politics and implementation of
- 9 health in all policies. *Israel J Health Policy Res* 2013; 2: 17. Study design.
- 10 81. Yamashita T, Kunkel SR. An international comparison of the association among
- 11 literacy, education and health across the United States, Canada, Switzerland, Italy,
- 12 Norway and Bermuda: implications for health disparities. *Asian J Soc Psychol* 2016;
- 13 18: 264-74. No eligible exposures.
- 14 82. Younsi M, Chakroun M. Does social capital determine health? Empirical evidence
- 15 from MENA countries. *Soc Sci J* 2016; 53(3): 371-9. No eligible exposures.
- 16
- 17
- 18
- 19
- 20
- 21
- 22
- 23
- 24
- 25
- 26
- 27
- 28
- 29
- 30
- 31
- 32
- 33
- 34
- 35
- 36
- 37
- 38
- 39
- 40
- 41
- 42
- 43
- 44
- 45
- 46
- 47
- 48
- 49
- 50
- 51
- 52
- 53
- 54
- 55
- 56
- 57
- 58
- 59
- 60

For peer review only

Supplementary file 3. Study-level risk of bias assessment

| First author, year   | Selection bias                 | Selection bias    | Chance                | Detection bias   | Detection bias  | Detection/Reporting bias | Reporting bias       |  | Summary |
|----------------------|--------------------------------|-------------------|-----------------------|------------------|-----------------|--------------------------|----------------------|--|---------|
|                      | Participant representativeness | Group equivalence | Sample size rationale | Exposure measure | Outcome measure | Appropriate analysis     | Conflict of interest |  |         |
| Ades, 2013           |                                |                   |                       |                  |                 |                          |                      |  |         |
| Adeyi, 1997          |                                |                   |                       |                  |                 |                          |                      |  |         |
| Akinci, 2014         |                                |                   |                       |                  |                 |                          |                      |  |         |
| Alvarez-Dardet, 2006 |                                |                   |                       |                  |                 |                          |                      |  |         |
| Avendano, 2009       |                                |                   |                       |                  |                 |                          |                      |  |         |
| Bambra, 2014         |                                |                   |                       |                  |                 |                          |                      |  |         |
| Bambra, 2009         |                                |                   |                       |                  |                 |                          |                      |  |         |
| Bambra, 2009         |                                |                   |                       |                  |                 |                          |                      |  |         |
| Bambra, 2006         |                                |                   |                       |                  |                 |                          |                      |  |         |
| Bambra, 2005         |                                |                   |                       |                  |                 |                          |                      |  |         |
| Batniji, 2014        |                                |                   |                       |                  |                 |                          |                      |  |         |
| Baum, 2003           |                                |                   |                       |                  |                 |                          |                      |  |         |
| Bentley, 2016        |                                |                   |                       |                  |                 |                          |                      |  |         |
| Bergh, 2010          |                                |                   |                       |                  |                 |                          |                      |  |         |



1  
2  
3  
4  
5  
6  
7  
8  
9  
10  
11  
12  
13  
14  
15  
16  
17  
18  
19  
20  
21  
22  
23  
24  
25  
26  
27  
28  
29  
30  
31  
32  
33  
34  
35  
36  
37  
38  
39  
40  
41  
42  
43  
44  
45  
46

|                   |        |        |        |       |       |       |        |       |        |
|-------------------|--------|--------|--------|-------|-------|-------|--------|-------|--------|
| Besley, 2006      | Green  | Yellow | Green  | Green | Green | Green | Yellow | White | Green  |
| Bosdriesz, 2015   | Green  | Yellow | Yellow | Green | Green | Green | Green  | White | Green  |
| Borrell, 2009     | Green  | Yellow | Yellow | Green | Green | Green | Green  | White | Green  |
| Bozorg mehr, 2014 | Green  | Yellow | Yellow | Green | Green | Green | Green  | White | Green  |
| Bradley, 2011     | Green  | Yellow | Yellow | Green | Green | Green | Green  | White | Green  |
| Brandt, 2014      | Green  | Yellow | Yellow | Green | Green | Green | Green  | White | Green  |
| Bremberg, 2016    | Green  | Yellow | Yellow | Green | Green | Green | Green  | White | Green  |
| Burroway, 2016    | Green  | Yellow | Yellow | Green | Green | Green | Green  | White | Green  |
| Burstrom, 2010    | Yellow | Yellow | Yellow | Green | Green | Green | Green  | White | Yellow |
| Cereseto, 1986    | Green  | Yellow | Yellow | Green | Green | Green | Green  | White | Green  |
| Chuang, 2013      | Green  | Yellow | Yellow | Green | Green | Green | Green  | White | Green  |
| Chuang, 2013      | Green  | Yellow | Yellow | Green | Green | Green | Green  | White | Green  |
| Chung, 2007       | Green  | Yellow | Yellow | Green | Green | Green | Yellow | White | Yellow |
| Chung, 2006       | Green  | Yellow | Yellow | Green | Green | Green | Yellow | White | Yellow |
| Conley, 2001      | Green  | Yellow | Yellow | Green | Green | Green | Yellow | White | Yellow |
| Copeland, 2015    | Yellow | Yellow | Yellow | Green | Green | Green | Green  | White | Yellow |
| Correa, 1992      | Green  | Yellow | Green  | Green | Green | Green | Yellow | White | Green  |

|    |                  |  |  |  |  |  |  |  |  |
|----|------------------|--|--|--|--|--|--|--|--|
| 1  |                  |  |  |  |  |  |  |  |  |
| 2  |                  |  |  |  |  |  |  |  |  |
| 3  | Corsi, 2014      |  |  |  |  |  |  |  |  |
| 4  | Costa-Font, 2016 |  |  |  |  |  |  |  |  |
| 5  | Craveiro, 2017   |  |  |  |  |  |  |  |  |
| 6  |                  |  |  |  |  |  |  |  |  |
| 7  | Cross, 2009      |  |  |  |  |  |  |  |  |
| 8  |                  |  |  |  |  |  |  |  |  |
| 9  | De Vogli, 2014   |  |  |  |  |  |  |  |  |
| 10 |                  |  |  |  |  |  |  |  |  |
| 11 | Dahl, 2013       |  |  |  |  |  |  |  |  |
| 12 | Deeming, 2012    |  |  |  |  |  |  |  |  |
| 13 | Devaux, 2015     |  |  |  |  |  |  |  |  |
| 14 | Dietrich, 2015   |  |  |  |  |  |  |  |  |
| 15 | Doherty, 2010    |  |  |  |  |  |  |  |  |
| 16 |                  |  |  |  |  |  |  |  |  |
| 17 | Dragano, 2010    |  |  |  |  |  |  |  |  |
| 18 | Dujardin, 2011   |  |  |  |  |  |  |  |  |
| 19 | Eikemo, 2008     |  |  |  |  |  |  |  |  |
| 20 |                  |  |  |  |  |  |  |  |  |
| 21 | Eikemo, 2008     |  |  |  |  |  |  |  |  |
| 22 | Elgar, 2011      |  |  |  |  |  |  |  |  |
| 23 | Elola, 1995      |  |  |  |  |  |  |  |  |
| 24 |                  |  |  |  |  |  |  |  |  |
| 25 | Engster, 2011    |  |  |  |  |  |  |  |  |
| 26 |                  |  |  |  |  |  |  |  |  |
| 27 | Esmaeli, 2011    |  |  |  |  |  |  |  |  |
| 28 |                  |  |  |  |  |  |  |  |  |
| 29 | Espelt, 2008     |  |  |  |  |  |  |  |  |
| 30 |                  |  |  |  |  |  |  |  |  |
| 31 |                  |  |  |  |  |  |  |  |  |
| 32 |                  |  |  |  |  |  |  |  |  |
| 33 |                  |  |  |  |  |  |  |  |  |
| 34 |                  |  |  |  |  |  |  |  |  |
| 35 |                  |  |  |  |  |  |  |  |  |
| 36 |                  |  |  |  |  |  |  |  |  |
| 37 |                  |  |  |  |  |  |  |  |  |
| 38 |                  |  |  |  |  |  |  |  |  |
| 39 |                  |  |  |  |  |  |  |  |  |
| 40 |                  |  |  |  |  |  |  |  |  |
| 41 |                  |  |  |  |  |  |  |  |  |
| 42 |                  |  |  |  |  |  |  |  |  |
| 43 |                  |  |  |  |  |  |  |  |  |
| 44 |                  |  |  |  |  |  |  |  |  |
| 45 |                  |  |  |  |  |  |  |  |  |
| 46 |                  |  |  |  |  |  |  |  |  |

1  
2  
3  
4  
5  
6  
7  
8  
9  
10  
11  
12  
13  
14  
15  
16  
17  
18  
19  
20  
21  
22  
23  
24  
25  
26  
27  
28  
29  
30  
31  
32  
33  
34  
35  
36  
37  
38  
39  
40  
41  
42  
43  
44  
45  
46

|                     |  |  |  |  |  |  |  |  |  |
|---------------------|--|--|--|--|--|--|--|--|--|
| Esser, 2010         |  |  |  |  |  |  |  |  |  |
| Estimé, 2014        |  |  |  |  |  |  |  |  |  |
| Fan, 2015           |  |  |  |  |  |  |  |  |  |
| Farfan-Portet, 2010 |  |  |  |  |  |  |  |  |  |
| Fayissa, 2001       |  |  |  |  |  |  |  |  |  |
| Foubert, 2014       |  |  |  |  |  |  |  |  |  |
| Franco, 2004        |  |  |  |  |  |  |  |  |  |
| Frey, 1999          |  |  |  |  |  |  |  |  |  |
| Fritzell, 2012      |  |  |  |  |  |  |  |  |  |
| Fritzell, 2013      |  |  |  |  |  |  |  |  |  |
| Fumagalli, 2013     |  |  |  |  |  |  |  |  |  |
| Gauri, 2002         |  |  |  |  |  |  |  |  |  |
| Gerring, 2008       |  |  |  |  |  |  |  |  |  |
| Gesthuizen, 2012    |  |  |  |  |  |  |  |  |  |
| Ghobarah, 2004      |  |  |  |  |  |  |  |  |  |
| Gilligan, 2015      |  |  |  |  |  |  |  |  |  |
| Gizeles, 2009       |  |  |  |  |  |  |  |  |  |
| Glass, 2016         |  |  |  |  |  |  |  |  |  |

|    |                        |  |  |  |  |  |  |  |  |
|----|------------------------|--|--|--|--|--|--|--|--|
| 1  |                        |  |  |  |  |  |  |  |  |
| 2  |                        |  |  |  |  |  |  |  |  |
| 3  |                        |  |  |  |  |  |  |  |  |
| 4  | Goryakin, 2015         |  |  |  |  |  |  |  |  |
| 5  | Granados, 2010         |  |  |  |  |  |  |  |  |
| 6  | Grosse Frie, 2010      |  |  |  |  |  |  |  |  |
| 7  | Guarnizo-Herreño, 2013 |  |  |  |  |  |  |  |  |
| 8  | Harding, 2013          |  |  |  |  |  |  |  |  |
| 9  | Hájek, 2012            |  |  |  |  |  |  |  |  |
| 10 | Hauck, 2016            |  |  |  |  |  |  |  |  |
| 11 | Heijink, 2013          |  |  |  |  |  |  |  |  |
| 12 | Hoffman, 2011          |  |  |  |  |  |  |  |  |
| 13 | Houweling, 2005        |  |  |  |  |  |  |  |  |
| 14 | Huijts, 2010           |  |  |  |  |  |  |  |  |
| 15 | Jolly, 2013            |  |  |  |  |  |  |  |  |
| 16 | Jorgenson, 2009        |  |  |  |  |  |  |  |  |
| 17 | Jorgenson, 2009        |  |  |  |  |  |  |  |  |
| 18 | Karim, 2010            |  |  |  |  |  |  |  |  |
| 19 | Kick, 1990             |  |  |  |  |  |  |  |  |
| 20 | Klenk, 2016            |  |  |  |  |  |  |  |  |
| 21 | Klomp, 2008            |  |  |  |  |  |  |  |  |
| 22 | Klomp, 2009            |  |  |  |  |  |  |  |  |
| 23 |                        |  |  |  |  |  |  |  |  |
| 24 |                        |  |  |  |  |  |  |  |  |
| 25 |                        |  |  |  |  |  |  |  |  |
| 26 |                        |  |  |  |  |  |  |  |  |
| 27 |                        |  |  |  |  |  |  |  |  |
| 28 |                        |  |  |  |  |  |  |  |  |
| 29 |                        |  |  |  |  |  |  |  |  |
| 30 |                        |  |  |  |  |  |  |  |  |
| 31 |                        |  |  |  |  |  |  |  |  |
| 32 |                        |  |  |  |  |  |  |  |  |
| 33 |                        |  |  |  |  |  |  |  |  |
| 34 |                        |  |  |  |  |  |  |  |  |
| 35 |                        |  |  |  |  |  |  |  |  |
| 36 |                        |  |  |  |  |  |  |  |  |
| 37 |                        |  |  |  |  |  |  |  |  |
| 38 |                        |  |  |  |  |  |  |  |  |
| 39 |                        |  |  |  |  |  |  |  |  |
| 40 |                        |  |  |  |  |  |  |  |  |
| 41 |                        |  |  |  |  |  |  |  |  |
| 42 |                        |  |  |  |  |  |  |  |  |
| 43 |                        |  |  |  |  |  |  |  |  |
| 44 |                        |  |  |  |  |  |  |  |  |
| 45 |                        |  |  |  |  |  |  |  |  |
| 46 |                        |  |  |  |  |  |  |  |  |

1  
2  
3  
4  
5  
6  
7  
8  
9  
10  
11  
12  
13  
14  
15  
16  
17  
18  
19  
20  
21  
22  
23  
24  
25  
26  
27  
28  
29  
30  
31  
32  
33  
34  
35  
36  
37  
38  
39  
40  
41  
42  
43  
44  
45  
46

|                        |        |        |        |       |       |       |        |       |        |
|------------------------|--------|--------|--------|-------|-------|-------|--------|-------|--------|
| Krueger, 2015          | Green  | Yellow | Yellow | Green | Green | Green | Yellow | White | Yellow |
| Kudamatsu, 2012        | Green  | Yellow | Green  | Green | Green | Green | Green  | White | Green  |
| Kuovo, 2015            | Yellow | Yellow | Yellow | Green | Green | Green | Yellow | White | Yellow |
| Lahelma, 1994          | Yellow | Yellow | Yellow | Green | Green | Green | Green  | White | Yellow |
| Lake, 2001             | Green  | Yellow | Yellow | Green | Green | Green | Yellow | White | Yellow |
| Lena, 1993             | Green  | Yellow | Yellow | Green | Green | Green | Yellow | White | Yellow |
| Levecque, 2011         | Green  | Yellow | Yellow | Green | Green | Green | Yellow | White | Yellow |
| Levecque, 2015         | Green  | Yellow | Yellow | Green | Green | Green | Yellow | White | Yellow |
| Levine, 2006           | Green  | Yellow | Yellow | Green | Green | Green | Yellow | White | Yellow |
| Lin, 2012              | Green  | Yellow | Yellow | Green | Green | Green | Green  | White | Green  |
| Lin, 2014              | Green  | Yellow | Yellow | Green | Green | Green | Green  | White | Green  |
| London, 1990           | Green  | Yellow | Yellow | Green | Green | Green | Yellow | White | Yellow |
| López-Casasnovas, 2014 | Green  | Yellow | Yellow | Green | Green | Green | Green  | White | Green  |
| Lundberg, 2008         | Green  | Yellow | Yellow | Green | Green | Green | Green  | White | Green  |
| McKinnon, 2016         | Green  | Yellow | Yellow | Green | Green | Green | Green  | White | Green  |
| Mackenbach, 2013       | Green  | Yellow | Yellow | Green | Green | Green | Yellow | White | Yellow |
| Mackenbach, 2013       | Green  | Yellow | Yellow | Green | Green | Green | Green  | White | Green  |
| Mackenbach, 2013       | Green  | Yellow | Yellow | Green | Green | Green | Green  | White | Green  |

1  
2  
3  
4  
5  
6  
7  
8  
9  
10  
11  
12  
13  
14  
15  
16  
17  
18  
19  
20  
21  
22  
23  
24  
25  
26  
27  
28  
29  
30  
31  
32  
33  
34  
35  
36  
37  
38  
39  
40  
41  
42  
43  
44  
45  
46

|                       |        |        |        |       |       |       |        |       |        |
|-----------------------|--------|--------|--------|-------|-------|-------|--------|-------|--------|
| Martens, 2010         | Green  | Yellow | Green  | Green | Green | Green | Green  | White | Green  |
| Maynard, 2015         | Green  | Yellow | Yellow | Green | Green | Green | Yellow | White | Yellow |
| Maynard, 2016         | Green  | Yellow | Yellow | Green | Green | Green | Yellow | White | Yellow |
| Miething, 2013        | Yellow | Yellow | Yellow | Green | Green | Green | Green  | White | Yellow |
| Menon-Johansson, 2005 | Green  | Yellow | Yellow | Green | Green | Green | Green  | White | Green  |
| Milner, 2011          | Green  | Yellow | Yellow | Green | Green | Green | Yellow | White | Yellow |
| Minagawa, 2013        | Green  | Yellow | Yellow | Green | Green | Green | Yellow | White | Yellow |
| Moon, 1985            | Green  | Yellow | Yellow | Green | Green | Green | Yellow | White | Yellow |
| Moor, 2013            | Green  | Yellow | Yellow | Green | Green | Green | Green  | White | Green  |
| Moore, 2006           | Green  | Yellow | Yellow | Green | Green | Green | Green  | White | Green  |
| Mukherjee, 2012       | Green  | Yellow | Yellow | Green | Green | Green | Yellow | White | Yellow |
| Muldoon, 2011         | Green  | Yellow | Yellow | Green | Green | Green | Green  | White | Green  |
| Muntaner, 2017        | Green  | Yellow | Green  | Green | Green | Green | Green  | White | Green  |
| Muntaner, 2002        | Green  | Yellow | Yellow | Green | Green | Green | Yellow | White | Yellow |
| Navarro, 2006         | Green  | Yellow | Yellow | Green | Green | Green | Green  | White | Green  |
| Navarro, 2003         | Green  | Yellow | Yellow | Green | Green | Green | Yellow | White | Yellow |
| Navarro, 2001         | Green  | Yellow | Yellow | Green | Green | Green | Yellow | White | Yellow |
| Navia, 2003           | Green  | Yellow | Yellow | Green | Green | Green | Yellow | White | Yellow |

1  
2  
3  
4  
5  
6  
7  
8  
9  
10  
11  
12  
13  
14  
15  
16  
17  
18  
19  
20  
21  
22  
23  
24  
25  
26  
27  
28  
29  
30  
31  
32  
33  
34  
35  
36  
37  
38  
39  
40  
41  
42  
43  
44  
45  
46

|                     |  |  |  |  |  |  |  |  |  |
|---------------------|--|--|--|--|--|--|--|--|--|
| Nelson, 2014        |  |  |  |  |  |  |  |  |  |
| Norden mark, 2006   |  |  |  |  |  |  |  |  |  |
| Novignon, 2012      |  |  |  |  |  |  |  |  |  |
| Oberlander, 2017    |  |  |  |  |  |  |  |  |  |
| Olafsdottir, 2007   |  |  |  |  |  |  |  |  |  |
| Olsen, 2007         |  |  |  |  |  |  |  |  |  |
| Oster, 2012         |  |  |  |  |  |  |  |  |  |
| Ouweneel, 2002      |  |  |  |  |  |  |  |  |  |
| Owen, 2007          |  |  |  |  |  |  |  |  |  |
| Palència, 2013      |  |  |  |  |  |  |  |  |  |
| Pickett, 2007       |  |  |  |  |  |  |  |  |  |
| Pillai, 2006        |  |  |  |  |  |  |  |  |  |
| Pinzón-Flórez, 2015 |  |  |  |  |  |  |  |  |  |
| Platts, 2015        |  |  |  |  |  |  |  |  |  |
| Ploubidis, 2012     |  |  |  |  |  |  |  |  |  |
| Popham, 2013        |  |  |  |  |  |  |  |  |  |
| Raphael, 2004       |  |  |  |  |  |  |  |  |  |
| Reeves, 2014        |  |  |  |  |  |  |  |  |  |

|    |                |  |  |  |  |  |  |  |  |
|----|----------------|--|--|--|--|--|--|--|--|
| 1  |                |  |  |  |  |  |  |  |  |
| 2  |                |  |  |  |  |  |  |  |  |
| 3  |                |  |  |  |  |  |  |  |  |
| 4  | Richter, 2012  |  |  |  |  |  |  |  |  |
| 5  | Ross, 2006     |  |  |  |  |  |  |  |  |
| 6  | Rostila, 2007  |  |  |  |  |  |  |  |  |
| 7  |                |  |  |  |  |  |  |  |  |
| 8  |                |  |  |  |  |  |  |  |  |
| 9  | Rovny, 2011    |  |  |  |  |  |  |  |  |
| 10 |                |  |  |  |  |  |  |  |  |
| 11 | Rudra, 2005    |  |  |  |  |  |  |  |  |
| 12 |                |  |  |  |  |  |  |  |  |
| 13 | Sacker, 2011   |  |  |  |  |  |  |  |  |
| 14 |                |  |  |  |  |  |  |  |  |
| 15 | Safaei, 2006   |  |  |  |  |  |  |  |  |
| 16 |                |  |  |  |  |  |  |  |  |
| 17 | Sanders, 2009  |  |  |  |  |  |  |  |  |
| 18 |                |  |  |  |  |  |  |  |  |
| 19 | Sarti, 2013    |  |  |  |  |  |  |  |  |
| 20 |                |  |  |  |  |  |  |  |  |
| 21 | Sekine, 2009   |  |  |  |  |  |  |  |  |
| 22 |                |  |  |  |  |  |  |  |  |
| 23 | Shandra, 2010  |  |  |  |  |  |  |  |  |
| 24 |                |  |  |  |  |  |  |  |  |
| 25 | Shandra, 2004  |  |  |  |  |  |  |  |  |
| 26 |                |  |  |  |  |  |  |  |  |
| 27 | Shen, 2001     |  |  |  |  |  |  |  |  |
| 28 | Shen, 1997     |  |  |  |  |  |  |  |  |
| 29 | Shim, 2015     |  |  |  |  |  |  |  |  |
| 30 |                |  |  |  |  |  |  |  |  |
| 31 | Stavrova, 2011 |  |  |  |  |  |  |  |  |
| 32 |                |  |  |  |  |  |  |  |  |
| 33 | Stroup, 2007   |  |  |  |  |  |  |  |  |
| 34 |                |  |  |  |  |  |  |  |  |
| 35 | Stuckler, 2010 |  |  |  |  |  |  |  |  |
| 36 |                |  |  |  |  |  |  |  |  |
| 37 | Tsai, 2006     |  |  |  |  |  |  |  |  |
| 38 |                |  |  |  |  |  |  |  |  |
| 39 |                |  |  |  |  |  |  |  |  |
| 40 |                |  |  |  |  |  |  |  |  |
| 41 |                |  |  |  |  |  |  |  |  |
| 42 |                |  |  |  |  |  |  |  |  |
| 43 |                |  |  |  |  |  |  |  |  |
| 44 |                |  |  |  |  |  |  |  |  |
| 45 |                |  |  |  |  |  |  |  |  |
| 46 |                |  |  |  |  |  |  |  |  |



1  
2  
3  
4  
5  
6  
7  
8  
9  
10  
11  
12  
13  
14  
15  
16  
17  
18  
19  
20  
21  
22  
23  
24  
25  
26  
27  
28  
29  
30  
31  
32  
33  
34  
35  
36  
37  
38  
39  
40  
41  
42  
43  
44  
45  
46

|                      |       |       |       |       |       |       |       |       |       |
|----------------------|-------|-------|-------|-------|-------|-------|-------|-------|-------|
| Van der Heuvel, 2013 | Amber | Amber | Amber | Green | Green | Green | Green | White | Amber |
| Van der Wel, 2011    | Green | Amber | Amber | Green | Green | Green | Green | White | Green |
| Van Tuyckom, 2011    | Green | Amber | Green | Green | Green | Green | Green | White | Green |
| Vahid Shahidi, 2016  | Green | Amber | Amber | Green | Green | Green | Green | White | Green |
| Veenhoven, 2000      | Green | Amber | Amber | Green | Green | Green | Amber | White | Amber |
| Veenhoven, 1995      | Green | Amber | Amber | Green | Green | Green | Amber | White | Amber |
| Vöörmann, 2013       | Amber | Amber | Amber | Green | Green | Green | Amber | White | Amber |
| Wejnert, 2008        | Green | Amber | Amber | Green | Green | Green | Amber | White | Amber |
| Whitehead, 2000      | Amber | Amber | Amber | Green | Green | Green | Green | White | Amber |
| Witvliet, 2013       | Green | Amber | Amber | Green | Green | Green | Green | White | Green |
| Wu, 2007             | Green | Amber | Amber | Green | Green | Green | Amber | White | Amber |
| York, 2014           | Green | Amber | Green | Green | Green | Green | Amber | White | Green |
| Zambon, 2006         | Green | Amber | Amber | Green | Green | Green | Amber | White | Amber |
| Zweifel, 2000        | Green | Amber | Amber | Green | Green | Green | Amber | White | Amber |

Green = high quality (low risk of bias); Amber = moderate quality (moderate risk of bias) or unknown; Red = low quality (high risk of bias)

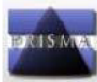

# PRISMA 2009 Checklist

1  
2  
3  
4  
5  
6  
7  
8  
9  
10  
11  
12  
13  
14  
15  
16  
17  
18  
19  
20  
21  
22  
23  
24  
25  
26  
27  
28  
29  
30  
31  
32  
33  
34  
35  
36  
37  
38  
39  
40  
41  
42  
43  
44  
45  
46  
47

|  |  |  |  |
|--|--|--|--|
|  |  |  |  |
|  |  |  |  |
|  |  |  |  |
|  |  |  |  |
|  |  |  |  |
|  |  |  |  |
|  |  |  |  |
|  |  |  |  |
|  |  |  |  |
|  |  |  |  |
|  |  |  |  |
|  |  |  |  |
|  |  |  |  |
|  |  |  |  |
|  |  |  |  |
|  |  |  |  |
|  |  |  |  |
|  |  |  |  |
|  |  |  |  |
|  |  |  |  |
|  |  |  |  |
|  |  |  |  |
|  |  |  |  |
|  |  |  |  |
|  |  |  |  |
|  |  |  |  |
|  |  |  |  |



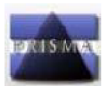

# PRISMA 2009 Checklist

1  
2  
3  
4  
5  
6  
7  
8  
9  
10  
11  
12  
13  
14  
15  
16  
17  
18  
19  
20  
21  
22  
23  
24  
25  
26  
27  
28  
29  
30  
31  
32  
33  
34  
35  
36  
37  
38  
39  
40  
41  
42  
43  
44  
45  
46  
47

|  |  |  |  |
|--|--|--|--|
|  |  |  |  |
|  |  |  |  |
|  |  |  |  |
|  |  |  |  |
|  |  |  |  |
|  |  |  |  |
|  |  |  |  |
|  |  |  |  |
|  |  |  |  |
|  |  |  |  |

\_\_\_\_\_

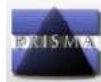

# PRISMA 2009 Checklist

| Section/topic                      | #  | Checklist item                                                                                                                                                                                                                                                                                              | Reported on page #       |
|------------------------------------|----|-------------------------------------------------------------------------------------------------------------------------------------------------------------------------------------------------------------------------------------------------------------------------------------------------------------|--------------------------|
| <b>TITLE</b>                       |    |                                                                                                                                                                                                                                                                                                             |                          |
| Title                              | 1  | Identify the report as a systematic review, meta-analysis, or both.                                                                                                                                                                                                                                         | 1                        |
| <b>ABSTRACT</b>                    |    |                                                                                                                                                                                                                                                                                                             |                          |
| Structured summary                 | 2  | Provide a structured summary including, as applicable: background; objectives; data sources; study eligibility criteria, participants, and interventions; study appraisal and synthesis methods; results; limitations; conclusions and implications of key findings; systematic review registration number. | 2                        |
| <b>INTRODUCTION</b>                |    |                                                                                                                                                                                                                                                                                                             |                          |
| Rationale                          | 3  | Describe the rationale for the review in the context of what is already known.                                                                                                                                                                                                                              | 4-5                      |
| Objectives                         | 4  | Provide an explicit statement of questions being addressed with reference to participants, interventions, comparisons, outcomes, and study design (PICOS).                                                                                                                                                  | 5                        |
| <b>METHODS</b>                     |    |                                                                                                                                                                                                                                                                                                             |                          |
| Protocol and registration          | 5  | Indicate if a review protocol exists, if and where it can be accessed (e.g., Web address), and, if available, provide registration information including registration number.                                                                                                                               | NA                       |
| Eligibility criteria               | 6  | Specify study characteristics (e.g., PICOS, length of follow-up) and report characteristics (e.g., years considered, language, publication status) used as criteria for eligibility, giving rationale.                                                                                                      | 6                        |
| Information sources                | 7  | Describe all information sources (e.g., databases with dates of coverage, contact with study authors to identify additional studies) in the search and date last searched.                                                                                                                                  | 6                        |
| Search                             | 8  | Present full electronic search strategy for at least one database, including any limits used, such that it could be repeated.                                                                                                                                                                               | Table 1                  |
| Study selection                    | 9  | State the process for selecting studies (i.e., screening, eligibility, included in systematic review, and, if applicable, included in the meta-analysis).                                                                                                                                                   | 5-7                      |
| Data collection process            | 10 | Describe method of data extraction from reports (e.g., piloted forms, independently, in duplicate) and any processes for obtaining and confirming data from investigators.                                                                                                                                  | 7                        |
| Data items                         | 11 | List and define all variables for which data were sought (e.g., PICOS, funding sources) and any assumptions and simplifications made.                                                                                                                                                                       | 7                        |
| Risk of bias in individual studies | 12 | Describe methods used for assessing risk of bias of individual studies (including specification of whether this was done at the study or outcome level), and how this information is to be used in any data synthesis.                                                                                      | 7                        |
| Summary measures                   | 13 | State the principal summary measures (e.g., risk ratio, difference in means).                                                                                                                                                                                                                               | 7, but not meta-analysis |

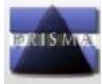

# PRISMA 2009 Checklist

|                      |    |                                                                                                                                                           |                         |
|----------------------|----|-----------------------------------------------------------------------------------------------------------------------------------------------------------|-------------------------|
| Synthesis of results | 14 | Describe the methods of handling data and combining results of studies, if done, including measures of consistency (e.g., $I^2$ ) for each meta-analysis. | 7, but no meta-analysis |
|----------------------|----|-----------------------------------------------------------------------------------------------------------------------------------------------------------|-------------------------|

Page 1 of 2

| Section/topic                 | #  | Checklist item                                                                                                                                                                                           | Reported on page #                  |
|-------------------------------|----|----------------------------------------------------------------------------------------------------------------------------------------------------------------------------------------------------------|-------------------------------------|
| Risk of bias across studies   | 15 | Specify any assessment of risk of bias that may affect the cumulative evidence (e.g., publication bias, selective reporting within studies).                                                             | NA, no meta-analysis                |
| Additional analyses           | 16 | Describe methods of additional analyses (e.g., sensitivity or subgroup analyses, meta-regression), if done, indicating which were pre-specified.                                                         | NA, no meta-analysis                |
| <b>RESULTS</b>                |    |                                                                                                                                                                                                          |                                     |
| Study selection               | 17 | Give numbers of studies screened, assessed for eligibility, and included in the review, with reasons for exclusions at each stage, ideally with a flow diagram.                                          | 7-8, Figure 2, Supplementary file 1 |
| Study characteristics         | 18 | For each study, present characteristics for which data were extracted (e.g., study size, PICOS, follow-up period) and provide the citations.                                                             | Tables 2-5                          |
| Risk of bias within studies   | 19 | Present data on risk of bias of each study and, if available, any outcome level assessment (see item 12).                                                                                                | 8, Supplementary file 3             |
| Results of individual studies | 20 | For all outcomes considered (benefits or harms), present, for each study: (a) simple summary data for each intervention group (b) effect estimates and confidence intervals, ideally with a forest plot. | Tables 2-5, no meta-analysis        |
| Synthesis of results          | 21 | Present results of each meta-analysis done, including confidence intervals and measures of consistency.                                                                                                  | NA, no meta-analysis                |
| Risk of bias across studies   | 22 | Present results of any assessment of risk of bias across studies (see Item 15).                                                                                                                          | NA, no meta-analysis                |
| Additional analysis           | 23 | Give results of additional analyses, if done (e.g., sensitivity or subgroup analyses, meta-regression [see Item 16]).                                                                                    | NA, no meta-analysis                |
| <b>DISCUSSION</b>             |    |                                                                                                                                                                                                          |                                     |
| Summary of evidence           | 24 | Summarize the main findings including the strength of evidence for each main outcome; consider their relevance to key groups (e.g., healthcare providers, users, and policy makers).                     | 10                                  |
| Limitations                   | 25 | Discuss limitations at study and outcome level (e.g., risk of bias), and at review-level (e.g., incomplete retrieval of identified research, reporting bias).                                            | 11-12                               |

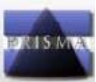

# PRISMA 2009 Checklist

1  
2  
3  
4  
5  
6  
7  
8  
9  
10  
11  
12  
13  
14  
15  
16  
17  
18  
19  
20  
21  
22  
23  
24  
25  
26  
27  
28  
29  
30  
31  
32  
33  
34  
35  
36  
37  
38  
39  
40  
41  
42  
43  
44  
45  
46  
47

|                |    |                                                                                                                                            |       |
|----------------|----|--------------------------------------------------------------------------------------------------------------------------------------------|-------|
| Conclusions    | 26 | Provide a general interpretation of the results in the context of other evidence, and implications for future research.                    | 13-15 |
| <b>FUNDING</b> |    |                                                                                                                                            |       |
| Funding        | 27 | Describe sources of funding for the systematic review and other support (e.g., supply of data); role of funders for the systematic review. | 15    |

From: Moher D, Liberati A, Tetzlaff J, Altman DG, The PRISMA Group (2009). Preferred Reporting Items for Systematic Reviews and Meta-Analyses: The PRISMA Statement. PLoS Med 6(7): e1000097. doi:10.1371/journal.pmed1000097

For more information, visit: [www.prisma-statement.org](http://www.prisma-statement.org).

For peer review only

# BMJ Open

## How much evidence is there that political factors are related to population health outcomes? An internationally comparative systematic review

|                                 |                                                                                                                                                                                                                                                         |
|---------------------------------|---------------------------------------------------------------------------------------------------------------------------------------------------------------------------------------------------------------------------------------------------------|
| Journal:                        | <i>BMJ Open</i>                                                                                                                                                                                                                                         |
| Manuscript ID                   | bmjopen-2017-020886.R1                                                                                                                                                                                                                                  |
| Article Type:                   | Research                                                                                                                                                                                                                                                |
| Date Submitted by the Author:   | 11-Mar-2018                                                                                                                                                                                                                                             |
| Complete List of Authors:       | Barnish, Max; University of Exeter, Exeter Medical School<br>Tørnes, Michelle; University of Aberdeen Institute of Applied Health Sciences, Ageing Clinical and Experimental Research (ACER)<br>Horne, Becky ; Independent scholar, Independent scholar |
| <b>Primary Subject Heading</b>: | Health policy                                                                                                                                                                                                                                           |
| Secondary Subject Heading:      | Public health                                                                                                                                                                                                                                           |
| Keywords:                       | PUBLIC HEALTH, Health policy < HEALTH SERVICES ADMINISTRATION & MANAGEMENT, Political determinants of health, SOCIAL MEDICINE                                                                                                                           |
|                                 |                                                                                                                                                                                                                                                         |

SCHOLARONE™  
Manuscripts



1

2  
3 **How much evidence is there that political factors are related to population health**  
4 **outcomes? An internationally comparative systematic review**

5 Max Barnish,<sup>1</sup> Michelle Tørnes,<sup>2</sup> and Becky Horne<sup>3</sup>

6  
7 1 = Institute of Health Research, Exeter Medical School, University of Exeter, Exeter, UK

8  
9 2 = Ageing Clinical and Experimental Research (ACER), School of Medicine, Medical  
10 Sciences and Nutrition, University of Aberdeen, Aberdeen, UK

11  
12 3 = Independent Scholar, London, UK

13 Correspondence to: m.s.barnish@exeter.ac.uk (Dr M. Barnish)

14  
15  
16  
17  
18  
19  
20  
21  
22  
23  
24  
25  
26  
27  
28  
29  
30  
31  
32  
33  
34  
35  
36  
37  
38  
39  
40  
41  
42  
43  
44  
45  
46  
47  
48  
49  
50  
51  
52  
53  
54  
55  
56  
57  
58  
59  
60

For peer review only

2

**ABSTRACT**

**Objectives:** To provide a seven-year update of the most recent systematic review about the relationships between political features and population health outcomes.

**Setting:** Internationally comparative scholarly literature.

**Data sources:** Ten scholarly bibliographic databases plus supplementary searches in bibliographies and Google Scholar were used to update a previous systematic review. The final search was conducted in November 2017.

**Primary and secondary outcome measures:** Any population health outcome measure, apart from healthcare spending.

**Results:** 73 unique publications were identified from the previous systematic review. The database searches to update the literature identified 45,356 raw records with 35,207 remaining following deduplication. 55 publications were identified from supplementary searches. In total, 258 publications proceeded to full-text review and 176 were included in narrative synthesis. Eighty-five studies were assessed at low risk of bias, 89 at moderate risk of bias and none at high risk of bias. Assessment could not be conducted for 2 studies with only book chapters. No meta-analysis was conducted. 102 studies assessed welfare state generosity and 79 found a positive association. 17 studies assessed political tradition and 15 found a positive association with left-of-centre tradition. 44 studies assessed democracy and 34 found a positive association. 28 studies assessed globalisation and 14 found a negative association, while 7 were positive and 7 inconclusive.

**Conclusions:** This review concludes that welfare state generosity, left-of-centre democratic political tradition and democracy are generally positively associated with population health. Globalisation may be negatively associated with population health, but the results are less conclusive. It is important for the academic public health community to engage with politics in its research as well as in advocacy and stakeholder engagement, in order to facilitate positive outcomes for population health.

3

**Strengths and limitations of this study**

- We offer the largest systematic review on the political determinants of population health.
- The use of a systematic review design offers a robust and reproducible method that minimises potential reviewer bias.
- Our review also involved searching ten major scholarly databases in addition to relevant supplementary searches.
- The internationally comparative approach ensures relevance to readers worldwide.
- Resources meant it was unfeasible to conduct a new review from inception rather than an update of a 2010 review.

For peer review only

## INTRODUCTION

### *Conceptualising politics*

Politics is an omnipresent feature of modern civilisations worldwide and has been described as the “practice of the art or science of directing and administrating states”.<sup>1</sup> Political views and systems differ substantially globally. However, they can usefully be conceptualised in terms of two axes. The first is democracy vs autocracy, and conceptualises the extent to which the population decides, either directly or indirectly, its government and governance.<sup>2</sup> The second is the left vs right axis, and conceptualises the extent to which a government intervenes in an attempt to secure social goals (progressive, left wing) or focuses on economic freedom and minimal state intervention (conservative, right wing).<sup>3</sup>

### *Opportunities for politics to influence population health*

One of the founding fathers of social medicine Rudolph Virchow said that “Medicine is a social science, and politics nothing but medicine at a larger scale”.<sup>4</sup> Indeed, many pathways to public health impact are political,<sup>5</sup> although the precise structures by which these operate differ between countries. Especially in developed countries, the existence of formal evidence-based systems is common in the licensing of medicines and medical devices (for example the European Medicines Agency and the Food and Drug Administration (United States of America)) and the development of national clinical guidelines and the approval for specific medicines and medical devices to be used in public sector health systems (for example the National Institute of Health and Care Excellence on behalf of the National Health Service in England and Wales).

Nevertheless, as Virchow said, health is about far more than medicine. For example, social and economic inequalities are strong predictors of health inequalities and more equal societies have been shown to be more successful.<sup>6-8</sup> Commonly, with regard to these social determinants of health, there is no formal evidence-based process and ideology dominates evidence in Parliamentary business,<sup>9</sup> leading to marked evidence-policy gaps.<sup>10</sup> Political

5

1  
2  
3 influences can operate at a variety of levels, including national governments, devolved  
4 governments (see supplementary file 1 for an example), and local authorities, which have  
5 taken a greater role in public health in recent years in many countries.<sup>11</sup>  
6  
7

### 8 9 ***Existing evidence about the relationship between politics and population health***

10  
11 While single-country evidence such as the review by Scott-Samuel et al<sup>12</sup> on the  
12 health effects of Thatcherism, and a recent studies on the effects of Conservative Party  
13 austerity in England<sup>13-14</sup> can be valuable, internationally comparative evidence allows us to  
14 transcend the particularities of individual countries and assess variation in parameters that  
15 are static within a given country.<sup>15</sup> The most recent internationally comparative systematic  
16 review that assessed a wide range of political features was published in 2011 with searches  
17 up to April 2010 (the 2010 review).<sup>16</sup> It did not include a risk of bias assessment. It assessed  
18 four key political features: democracy, welfare state, left-of-centre political tradition and  
19 globalisation.  
20  
21  
22  
23  
24  
25  
26  
27  
28  
29

30 The 'contestability'<sup>17</sup> inherent in democracy may be health-promoting due to the  
31 potential electoral consequences of unpopular policies. Left-of-centre political tradition, and  
32 an advanced welfare state which is a key marker thereof,<sup>3</sup> may be health-promoting due to a  
33 greater focus on active state intervention to address social, economic and health  
34 inequalities,<sup>6-8</sup> and consequent greater alignment to public health mission statements, such  
35 as that of the European Public Health Association.<sup>18</sup> Globalisation is a multi-faceted concept,  
36 but may include trade liberalisation and free-markets, which are more favoured by the  
37 political right than the left.<sup>3</sup> The 2010 review suggested that globalisation was negatively  
38 associated with population health outcomes, while democracy, welfare state and left-of-  
39 centre political tradition were positively associated. The majority of studies had been  
40 published in the five year period up to the search, indicating an active field of research. This  
41 suggests that the 2010 review is likely now to be considerably out of date.  
42  
43  
44  
45  
46  
47  
48  
49  
50  
51  
52  
53

### 54 55 ***Aims***

6

We offer an updated systematic review investigating relationships between four key political features (democracy, welfare state, political tradition, and globalisation) and population health outcomes. This represents the largest systematic review to date of evidence in this field.

## **METHODS**

### ***Design***

A narrative systematic review design was used following the internationally accepted PRISMA guidelines.<sup>19</sup> MB was the lead reviewer. Proportionate independent second review was performed by BH for each stage in the review process, whereby this author independently appraised 20% of records for each stage. There were few disagreements, and where there arose, they were resolved by discussion.

### ***Data sources***

As this was an updated systematic review, all included studies from the 2010 review proceeded directly to the full-text review stage. An update search was conducted on ten scholarly databases from 2010 to April 2017 inclusive (MEDLINE, AMED, EMBASE, PsycINFO (all Ovid), CINAHL, Philosopher's Index (both Ebsco), Science Citation Index Expanded, Social Sciences Citation Index, Emerging Sources Citation Index (all Web of Science) and Sociological Abstracts (ProQuest), following the conceptual search strategy shown in Table 1, from which search strings for the syntax of each database were developed. The full MEDLINE search strategy is shown in Supplementary file 2. Supplementary searches back to 2006 were conducted on Google Scholar and in relevant bibliographies. The final search was conducted in November 2017.

### ***Inclusion criteria***

Records were screened initially by title and abstract, and then in full text form for potential inclusion according to the following criteria:

7

- Peer-reviewed journal article in a scientific journal or a scholarly book or chapter
- Study human populations either at the individual or ecological level
- Present at least one measure of a political exposure, conceptualised in terms of the welfare state, political tradition, democracy or globalisation. These political features were defined exactly following Muntaner et al.<sup>16</sup>
- Present at least one measure of a population health outcome. Healthcare spending alone was not considered an eligible outcome
- Use any quantitative empirical design to link the exposure to the outcome
- Present a comparison involving at least 2 countries

### **Data extraction**

Results were classified into one of four political themes – welfare state, political tradition, democracy and globalisation. Studies were allowed to contribute to more than one political theme. The following information was extracted for each included study: i) bibliographic details, ii) sampling frame, iii) years of study, iv) design, v) political themes to which the study contributes, vi) measure(s) of political exposures, vii) measure(s) of population health outcome measures, and iix) results classification (positive, negative or inconclusive association between the political exposure and population health outcome measures).

### **Risk of bias assessment**

Risk of bias assessment was conducted at the study level using the Threats to Validity Tool,<sup>20</sup> using the configuration of Barnish and Barnish,<sup>21</sup> with one modification. Loss-to-follow-up was not considered relevant for the body of studies included in this review. Following Barnish et al,<sup>22</sup> the categories were set as i) low risk of bias (high quality) if  $\geq 70\%$  of eligible items were assessed as at low risk of bias, ii) moderate risk of bias (moderate quality) for 40-69%, and iii) high risk of bias (low quality) for  $\leq 39\%$ . This assessment could not be conducted for studies that only comprised of book chapters, since the tool is not suitable, and format incompatibility could introduce bias into the assessment.

## Data synthesis

In light of differences in political contexts between countries, and in terms of how political exposures and population health outcomes were measured, narrative synthesis was considered more appropriate than meta-analysis. Studies were grouped by political theme. In addition to our base case analysis, certain scenario analyses were conducted to further explore the data:

1. Studies that take economic factors into consideration, for each of the four themes except globalisation
2. Studies that include developing countries, for each of the four themes
3. Studies looking at general health or quality of life, for each of the four themes
4. Studies using a welfare regime classification scheme, for the welfare state theme
5. Studies using a political tradition classification scheme, for the political tradition theme

The scenario analysis on economic factors was not conducted for the globalisation theme because globalisation itself has a dominant economic component, so this is already measured. A formal test of economic mediation was not required – it was sufficient that studies took economic factors into consideration.

## Patient and public involvement

- ***How was the development of the research question and outcome measures informed by patients' priorities, experience, and preferences?***

This is a systematic review of population health outcomes generally, and is not focused on one medical condition. Our understanding of the field was shaped by public debates on health policy, including on TV and in the newspapers, as well as scholarly sources. Our author team includes one person Becky Horne, who while very skilled at reviewing and analysis, is not a full-time university academic. This allowed us a wider perspective on the relevance of our work. We were mindful,



1  
2  
3 however, not to focus the article excessively on our own countries, which do form the  
4 majority of our personal experience and insight.

5  
6  
7 **▪ *How did you involve patients in the design of this study?***

8  
9 As a systematic review on population health outcomes in general, rather than one  
10 specific medical condition, there was no one defined patient group relevant to inform  
11 the design of this study. Becky Horne contributed to the study design as our lay  
12 member of the research team.

13  
14  
15  
16  
17 **▪ *Were patients involved in the recruitment to and conduct of the study?***

18  
19 As a systematic review, there was no recruitment to this study. Our lay member of  
20 the team Becky Horne contributed fully to the conduct of the study.

21  
22  
23 **▪ *How will the results be disseminated to study participants?***

24  
25 As a systematic review, there were no participants. We will respond to any reputable  
26 requests for interview from the media, and may initiate communication with certain  
27 media outlets. However, we do note that in our countries, there have been already  
28 been many articles and features in the media about politics and health. Therefore, we  
29 do not consider that a mass media release would offer substantive added value.

30  
31  
32  
33  
34 **▪ *For randomised controlled trials, was the burden of the intervention assessed  
35 by patients themselves?***

36  
37 Our work is not a randomised controlled trial.

38  
39  
40  
41 **▪ *Patient advisers should also be thanked in the contributorship  
42 statement/acknowledgements.***

43  
44 There are no such persons who do not fulfil the authorship criteria. Becky Horne  
45 fulfils the authorship criteria and is named as an author accordingly.

46  
47  
48  
49 **RESULTS**

50  
51  
52 ***Search results***

53  
54 Seventy-three de-duplicated records came from the 2010 review. Update database  
55 searches yielded 43, 356 records in total, of which 35,207 remained following deduplication.

1  
2  
3 Supplementary searches on Google Scholar and in bibliographies yielded 55 additional  
4 records. From 35, 333 unique records, 255 proceeded to full-text screening and all were  
5 retrieved. 176 studies were included in our review (Supplementary file 3), of which 106 came  
6 from our update searches and 70 from the 2010 review. 82 studies were excluded at the full-  
7 text review stage (Supplementary file 4). Studies were published in final form a median of 6  
8 years (IQR 4-8) after the year of final data collection and the longest lag was 20 years  
9 (Figure 1). The most recent data included in the analyses was collected in 2014. A PRISMA  
10 flowchart (Figure 2) and PRISMA checklist (Supplementary file 5) are provided. Eighty-five  
11 studies (49%) were assessed at low risk of bias, 89 (51%) at moderate risk of bias and none  
12 at high risk of bias. Risk of bias assessment could not be conducted for two studies (1% of  
13 total) whose only included publications came in the form of book chapters. Study-level risk of  
14 bias profiles are provided in Supplementary file 6.

### 26 27 **Welfare state**

28  
29  
30 A total of 102 studies addressed the welfare state theme. Of these, 79 (77%)  
31 provided evidence that was favourable about the association of increased welfare state  
32 generosity with population health, 20 (20%) were inconclusive, and three (3%) were  
33 negative. Most studies either classified welfare state generosity in terms of a welfare regime  
34 classification or in terms of expenditure on health and social care. Welfare regime  
35 classifications did vary between studies, but often compared an 'advanced', e.g. Nordic<sup>23</sup>  
36 welfare regime with liberal and also market-driven/conservative alternatives. Health  
37 outcomes for welfare state studies included self-rated general health, quality of life,  
38 prevalence of chronic conditions, mental health, life expectancy and child and infant  
39 mortality. Supplementary file 7 provides study-level details.

40  
41  
42 Among studies that took economic factors into consideration (n=83), 82% found a  
43 more generous welfare state to be positively associated with population health. Among  
44 studies including developing countries (n=23), 83% found this association. Among studies  
45 that used a general health or quality of life outcome (n=32), 69% found this association.

11

1  
2  
3 Considering only studies that used a welfare regime classification, 73% found this  
4  
5 association.

### 6 7 ***Political tradition*** 8

9  
10 A total of seventeen studies addressed the political tradition theme. Of these, 15  
11 (88%) were positive about the association of left-of-centre political tradition with population  
12 health, while two (12%) were inconclusive. Ways in which political tradition was measured  
13 included political tradition classification of ruling government, time in power by different  
14 parties, voter partisanship, proportion of seats held by left-wing or left-of-centre parties and  
15 working class power. Population health outcomes included life expectancy, infant and child  
16 mortality, life expectancy, older adult mortality, general self-rated health and successful  
17 implementation of effective health policies. Supplementary file 8 provides study-level details.  
18  
19  
20  
21  
22  
23  
24  
25

26 All studies in the political tradition theme considered economic factors, so no  
27 scenario analysis was conducted on this factor. Among studies including developing  
28 countries, all (n=6) found left-of-centre political tradition to be positively associated with  
29 population health outcomes. Among studies that used a general health or quality of life  
30 outcome, all (n=6) found this association. Among studies that used a political tradition  
31 classification scheme (n=8), 88% found this association.  
32  
33  
34  
35  
36  
37  
38

### 39 ***Democracy*** 40

41 A total of 44 studies addressed the democracy theme. Of these, 34 (77%) were  
42 positive, eight (18%) were inconclusive and two (5%) negative. Ways in which democracy  
43 was measured included political transition to democracy, years of democracy since 1900,  
44 the presence of elections and standardised indices such as Polity IV.<sup>24</sup> Population health  
45 outcomes included measures such as general self-rated health, life expectancy, older adult  
46 mortality, and successful implementation of effective health policies, while there was a  
47 particular focus on infant and child mortality and other child health outcomes. Supplementary  
48 file 9 provides study-level details.  
49  
50  
51  
52  
53  
54  
55  
56  
57  
58  
59  
60

12

1  
2  
3 Among studies taking economic factors into consideration (n=39), 77% found  
4 democracy to be positively associated with population health outcomes. Among studies  
5 including developing countries (n=25), 76% found this association. Among studies that used  
6 a general health or quality of life outcome, all (n=3) found this association.  
7  
8  
9

### 10 **Globalisation**

11  
12  
13  
14 A total of 28 studies addressed the globalisation theme. Of these, seven (25%) were  
15 positive, seven (25%) were inconclusive, and fourteen (50%) were negative. Measures of  
16 globalisation included world-system role, foreign trade, debt dependency, imports and  
17 exports, as well as membership of organisations such as the World Trade Organization and  
18 standardised indices such as the Maastricht Globalization Index<sup>25</sup> and the KOF Index.<sup>26</sup>  
19  
20 Many studies measured infant and child health outcomes and mortality, while assessed  
21 measures including life expectancy, obesity, water pollution and tobacco smoking rates.  
22  
23  
24  
25  
26  
27  
28  
29  
30  
31  
32  
33  
34  
35  
36  
37  
38  
39  
40  
41  
42  
43  
44  
45  
46  
47  
48  
49  
50  
51  
52  
53  
54  
55  
56  
57  
58  
59  
60  
Supplementary file 10 provides study-level results.

All globalisation studies included data from developing countries, so no scenario analysis was performed on this factor. Only one study in this theme assessed general health or quality of life, and found a positive association between globalisation and health-related quality of life.

## 39 **DISCUSSION**

### 42 **Summary of findings**

45  
46  
47  
48  
49  
50  
51  
52  
53  
54  
55  
56  
57  
58  
59  
60  
We present a body of evidence from 176 internationally comparative scholarly studies that together provides powerful evidence that key political characteristics are important predictors of a range of population health outcomes. The evidence was favourable about a positive association with population health for all of increased welfare state generosity, left-of-centre democratic political tradition and democracy, supported by over three quarters of eligible studies. Twice as much evidence supported a negative association

1  
2  
3 with population health for globalisation than a positive association, although a quarter of  
4 studies were inconclusive. Scenario analyses showed that i) most studies considered  
5 economic factors and excluding those that did not made little difference to the results, ii)  
6  
7 apart from in the globalisation theme a minority of studies included developing countries but  
8  
9 the results of those that did were generally consistent with those that did not, iii)  
10  
11 classification schemes for welfare state and political tradition made little difference to the  
12  
13 results, and iv) the proportion of studies using general health or quality of life outcome  
14  
15 measures was relatively low, but the results were directionally consistent with the wider set  
16  
17 of studies.  
18  
19  
20

### 21 ***Risk of bias assessment***

22  
23  
24 Eighty-five studies (49%) were assessed at low risk of bias, 89 (51%) at moderate  
25  
26 risk of bias and none at high risk of bias. However, low risk of bias of individual studies does  
27  
28 not mean that there is necessarily low risk of bias across studies, especially when grouping  
29  
30 so many heterogeneous studies. The three types of potential bias that were found quite  
31  
32 often were chance, group equivalence and potential conflict of interest. Most studies were  
33  
34 very large, however they tended not to provide a rationale for their sample size or provide  
35  
36 information to let us assess whether there may have been under- or indeed overpowered to  
37  
38 detect associations. Group equivalence is very hard to achieve in studies such as the ones  
39  
40 eligible for our review, since it would entail countries being similar in most other ways except  
41  
42 the political variable of interest. Substantive conflicts of interest were rare, but more of an  
43  
44 issue was an absence of funding statements or declarations as to whether there were any  
45  
46 conflicts of interest. This absence was particularly notable among studies published in social  
47  
48 science journals. No studies declared any party political members among the authors, yet it  
49  
50 seems incongruous to believe that no author among 176 health policy studies was a  
51  
52 member of a political party. Rather, it seems that political conflicts of interest are seldom  
53  
54 declared, when potentially they should.  
55  
56  
57  
58  
59  
60

### **Strengths**

We offer the largest systematic review on the political determinants of population health, and the first wide ranging internationally comparative systematic review of similar scope since 2010. The use of a systematic review design offers a robust and reproducible method that minimises potential reviewer bias in the selection and evaluation of studies for potential inclusion.<sup>27</sup> Our review also involved searching ten major scholarly databases and this very thorough coverage of the literature is reflected in a very low proportion of studies being identified from supplementary searches. All publications identified for full-text screening were successfully obtained. Conducting searches back to 2006 as part of our update enabled us to include a further ten eligible studies published before the search date of the 2010 review. We independently evaluated all studies from the 2010 review and allowed studies to contribute to multiple themes, allowing further relevant data to be included. The internationally comparative approach ensures relevance to readers worldwide and transcends the limitations associated with single-country studies. Unlike the authors of the 2010 review, we were able to provide a risk of bias assessment.

### **Limitations**

Resources precluded a new review from inception, and required us to update an English-language only review from 2010. Moreover, conducting an update required us to maintain consistency with the 2010 review in terms of inclusion criteria, and precluded us from considering a wider range of grey literature sources, such as Organisation for Economic Co-operation and Development (OECD) reports, which may have relevant data. Moreover, the categorical form of data extraction in terms of positive, inconclusive or negative results followed this previous review and was necessitated by its scope and scale. Limiting reviews to the English language may not exert systematic bias in systematic reviews, at least according to evidence from reviews of healthcare interventions.<sup>28</sup> The diversity of political and health-system contexts as well as measures of political exposures

15

1  
2  
3 and population health outcomes precluded meta-analysis. The internationally comparative  
4 approach increases relevance for an international readership, yet it introduces complexities  
5 in the mapping between political characteristics and political parties in both systematic and  
6 idiosyncratic ways.<sup>29-33</sup> Public health policy evidence is typically observational, which reflects  
7 real-world situations. Observational studies do not intrinsically overstate effect sizes<sup>34</sup> and  
8 can be highly valuable.<sup>5</sup> Causative inference can be made more complicated by different  
9 causal pathways, different confounders, and different covariates, although systems such as  
10 Bradford Hill<sup>35</sup> may be used as a starting point. Studies did not regularly report their study  
11 design thoroughly or consistently in terms of recognised design labels beyond the basics  
12 such as ecological vs individual studies, which limited the level of detail in which information  
13 on study design could be extracted.

### 24 25 ***Comparison with previous reviews***

26  
27  
28 Our review offers a seven and a half year search advance on the most recent  
29 internationally comparative systematic review to offer an equivalent scope. The 2010 review  
30 by Muntaner et al<sup>16</sup> included 73 studies, of which 70 were eligible for our review. Three were  
31 excluded from our review since they only included healthcare spending as an outcome. We  
32 considered that to be circular, since healthcare spending was also frequently used by  
33 studies as a marker of welfare state generosity. To these 70 studies, we added a further 106  
34 (10 of which were dated prior to the search of the 2010 review), giving a total of 176 studies  
35 in our review. Those added by our update constituted 60% of the total (58% if the 10 studies  
36 we added from prior to 2010 were removed from the numerator and denominator),  
37 demonstrating how the scale of the evidence base for the political determinants of population  
38 health has more than doubled over the past seven and a half years.

39  
40  
41 The strength of evidence that welfare state generosity is positively associated with  
42 population health has increased slightly (77% vs 72% positive), while the number of studies  
43 has more than tripled (102 vs 32). The strength of evidence that left-of-centre political  
44  
45  
46  
47  
48  
49  
50

16

1  
2  
3 tradition is positively associated with population health has increased markedly (88% vs 60%  
4 positive), while the number of studies has increased modestly (17 vs 12). Notably, far fewer  
5 studies have explicitly studied political tradition than the welfare state, which is one of the  
6 key markers of political tradition. The strength of evidence that democracy is positively  
7 associated with population health is largely unchanged (77% vs 78%), while the number of  
8 studies has increased substantially (44 vs 27). The strength of evidence that globalisation is  
9 negatively associated with population health has weakened (50% vs 75% negative), while  
10 the number of studies has increased sevenfold (28 vs 4).

11  
12  
13  
14  
15  
16  
17  
18  
19 A prior review in the interim<sup>36</sup> had found that the strength of evidence for the benefits  
20 of welfare state generosity was greater for studies assessing spending patterns than welfare  
21 regime typologies. We did not find a strong effect – 73% of studies assessing regime  
22 typologies were positive compared to 77% of studies irrespective of how the welfare state  
23 was measured. The Nordic model found in Scandinavia was presented by most studies as  
24 the example of an advanced welfare state. However, classifications used in these typologies  
25 are imperfect, and in many ways the Scottish system (see supplementary file 1) could be  
26 argued to represent a more advanced welfare state, since Norway for example does not  
27 offer universal free healthcare at point of use. Our findings on the welfare state and political  
28 tradition were also consistent with those of Scott-Samuel et al<sup>12</sup> regarding Thatcherism in the  
29 United Kingdom, which found a widening of health inequalities resultant from the introduction  
30 of reduced state welfare provision and increased privatisation and pro-market policies.  
31  
32  
33  
34  
35  
36  
37  
38  
39  
40  
41  
42  
43

#### 44 ***Recommendations for research and academic practice***

45  
46  
47 It is important that health research increasingly focuses on real-world contexts to  
48 supplement more idealised studies.<sup>5</sup> Health research that does not consider political and  
49 cultural factors may lack relevance and generalisability,<sup>37</sup> especially research into the social  
50 determinants of health. Academic public health has a long pro-social political history,<sup>38</sup> but  
51 recently there has been reluctance to advocate both at the individual<sup>4</sup> and organisational  
52  
53  
54  
55  
56  
57  
58  
59  
60



1  
2  
3 level.<sup>39</sup> Developing advocacy as a fundamental part of public health academia is important to  
4 combat industry lobbyists,<sup>40-41</sup> and inform the public of the consequences of electoral  
5 choices. Kapilashrami et al<sup>42</sup> provide interesting insight into an example of an advocacy  
6 programme. Meanwhile, a recent debate in the BMJ about the relative priority of action and  
7 research in public health<sup>43</sup> and an article on the extent to which academic advocacy is a  
8 disciplinary duty in public health<sup>44</sup> may interest the reader. Moreover, partnership  
9 approaches<sup>45</sup> to knowledge translation can be successful, but depend on an ideological  
10 match with the potential end user.

### 11 12 13 14 15 16 17 18 19 ***Implications for policy and practice***

20  
21  
22 Clinicians and decision makers should be aware of the context in which they work,  
23 and the political influences on medicine and health outcomes. They should seek to find ways  
24 to increase the use of evidence in decisions impacting on health. Ideas such as ‘health in all  
25 policies’<sup>46</sup> are worthwhile, but only if they are genuinely put into action and not seen as a ‘tick  
26 box’ exercise.

### 27 28 29 30 31 32 33 ***Conclusion***

34  
35  
36 In conclusion, we present a systematic review of 176 studies that demonstrates that  
37 politics is an important determinant of population health outcomes, and one with which the  
38 academic and clinical population health community should engage more and advocate for  
39 the health of our populations.

### 40 41 42 43 44 45 **FOOTNOTES**

46  
47  
48 **Contributors:** MB was the project director and project manager. The study was  
49 conceptualised by MB with input from MT and BH. Searches were conducted by MB. Study  
50 selection, data extraction and quality assessment were conducted by MB with proportionate  
51 second review from BH. Data interpretation was led by MB with input from MT and BH. MB  
52 wrote the first draft of the paper. MT and BH commented on the draft manuscript and  
53 thereby contributed important revisions. All tables, figures and supplementary files were  
54 made by MB. All authors approved the submission. MB is the guarantor.

**Funding:** This research received no specific grant from any funding agency in the public, commercial or not-for-profit sectors.

**Competing interests:** The authors have personal views and/or memberships on the political left that we do not consider conflict with the vision of public health. MB is a member of the Labour Party (United Kingdom), MT is a member of the Scottish National Party (SNP, a centre-left pro-independence party that forms the devolved government of Scotland) and BH is not a member of any party. This work was not done on behalf of any political party and is not endorsed, influenced or supported in any way by the parties of which authors are members. MB is a social democrat/liberal socialist. MT is a democratic socialist and supports Scottish independence. BH is a democratic socialist. The authors engage in appropriate activities to promote public health and social justice. We have no financial conflicts of interest.

**Ethics approval:** No ethics approval was required for this systematic review of published literature.

**Declaration:** All views presented in this article are the authors' own, and not necessarily those of their institutions nor bodies that fund their other research projects.

**Data sharing statement:** No further data are available.

## REFERENCES

1. McLean I, McMillan A. Oxford concise dictionary of politics. Oxford: Oxford University Press; 2003.
2. Cartledge P. Democracy: a life. Oxford: Oxford University Press; 2015.
3. Gauchet M. Right and left. In: Nora P, Kritzman LD, editors. Realms of memory: conflicts and divisions. New York: Columbia University Press; 1997.
4. Mackenbach JP. Politics is nothing but medicine at a larger scale: reflections on public health's biggest idea. *J Epidemiol Community Health* 2008; 63: 181-4.
5. Barnish MS, Turner S. The value of pragmatic and observational studies in health care and public health. *Pragmat Obs Res* 2017; 8: 49-55.
6. Rowlingson K. Does income inequality cause health and social problems? York: Joseph Rowntree Foundation; 2011.
7. Marmot M. The Marmot Review: Fair Society, Healthy Lives. London: The Marmot Review; 2010.
8. Wilkinson R, Pickett K. The spirit level: why equality is better for everyone. London: Penguin; 2010.
9. Bambra C. The primacy of politics: the rise and fall of evidence-based public health policy? *J Public Health (Oxf)* 2013; 35: 486-7.
10. Ferrie JE. Evidence and policy: mind the gap. *Int J Epidemiol* 2015; 44: 1-7.
11. Reijneveld SA. The return of community-based health and social care to local government: governance as a public health challenge. *Eur J Public Health* 2017; 27: 1.
12. Scott-Samuel A, Bambra C, Collins C, et al. The impact of Thatcherism on health and wellbeing in Britain. *Int J Health Serv* 2014; 44: 53-71.
13. Watkins J, Wulaningsih W, Da Zhou C, et al. Effects of health and social care spending constraints on mortality in England: a time trend analysis. *BMJ Open* 2017; 7: e017722.
14. Hiam L, Dorling D, Harrison D, et al. What caused the spike in mortality in England and Wales in January 2015? *J R Soc Med* 2017; 110: 131-7.
15. Rose G. Sick individuals and sick populations. *Int J Epidemiol* 2001; 30: 427-32.

- 1
- 2
- 3 16. Muntaner C, Borrell C, Ng E, et al. Politics, welfare regimes, and population health: controversies and evidence. *Sociol Health Illn* 2011; 33: 946-64.
- 4 17. Dahl RA. *Polyarchy: participation and opposition*. New Haven: Yale University Press; 1971.
- 5 18. European Public Health Association. Who we are. Available at: <https://eupha.org/who-we-are> [Accessed 24 February 2018]
- 6 19. Moher D, Liberati A, Tetzlaff J, et al. Preferred reporting items for systematic reviews and meta-analyses: the PRISMA statement. *BMJ* 2009; 339: b2535.
- 7 20. Daley DJ, Myint PK, Gray RJ, et al. Systematic review on factors associated with medication non-adherence in Parkinson's disease. *Parkinsonism Relat Disord* 2012; 18: 1053-61.
- 8 21. Barnish MS, Barnish J. High-heeled shoes and musculoskeletal injuries: a narrative systematic review. *BMJ Open* 2016; 6: e010053.
- 9 22. Barnish MS, Whibley D, Horton SMC, et al. Roles of cognitive status and intelligibility in everyday communication in people with Parkinson's disease: a systematic review. *J Parkinsons Dis* 2016; 6: 453-62.
- 10 23. Kildal N, Kuhnle S. The Nordic welfare model and the idea of universalism. In: Kildal N, Kuhnle S, editors. *Normative foundations of the welfare state: the Nordic experience*. London: Routledge; 2006, pp.13-33.
- 11 24. Marshall MG, Jagers K. *Polity IV project: political regime characteristics and transitions*. Severn, MD: Center for Systemic Peace; 2006.
- 12 25. Figge L, Martens P. Globalisation continues: the Maastricht Globalization Index revisited and updated. *Globalizations* 2014; 11: 875-93.
- 13 26. Dreyer A. Does globalization affect growth? Evidence from a new index of globalization. *Appl Econom* 2006; 38: 1091-110.
- 14 27. Uman LS. Systematic reviews and meta-analyses. *J Can Acad Child Adolesc Psychiatry* 2011; 20: 57-59.
- 15 28. Jüni P, Holenstein F, Sterne J, et al. Direction and impact of language bias in meta-analyses of controlled trials. *Int J Epidemiol* 2002; 31: 115-23.
- 16 29. Goldfarb M. Liberal? Are we talking about the same thing? *BBC News*, 20 July 2010.
- 17 30. Thorpe A. *A history of the British Labour Party*. Basingstoke: Palgrave Macmillan; 2008.
- 18 31. Scott-Samuel A, Bambra C. A week is a long time in politics: the health implications of Jeremy Corbyn's UK Labour Party leadership victory. *Int J Health Serv* 2016; 46: 141-48.
- 19 32. Barnish M, Morgan HM, Barnish J. The 2016 HIGH Heels: Health effects And psychosexual BenefITS (HIGH HABITS) study: systematic review of reviews and additional primary studies. *BMC Public Health* 2017; 18: 37.
- 20 33. Office of the Premier. B.C. bans mandatory high heels in the workplace. Victoria, British Columbia, 7 April 2017.
- 21 34. Concato J, Shah N, Horwitz RI. Randomized, controlled trials, observational studies, and the hierarchy of research designs. *N Engl J Med* 2000; 342:1887-92.
- 22 35. Hill AB. The environment and disease: association or causation? *Proceed R Soc Med* 1965; 58: 295-300.
- 23 36. Bergqvist K, Åberg Yngwe M, Lundberg O. Understanding the role of welfare state characteristics for health and inequalities – an analytical review. *BMC Public Health* 2013; 13: 1234.
- 24 37. Levecque K, van Rossem R, de Boyser K, et al. Economic hardship and depression across the life course: the impact of welfare state regimes. *J Health Soc Behav* 2011; 52: 262-76.
- 25 38. Horton R. Offline: Medicine and Marx. *Lancet* 2017; 390: 2026.
- 26 39. Chauvin JB. Advocacy: the silence of Europe's public health associations is deafening. *Eur J Public Health* 2016; 26: 2.
- 27
- 28
- 29
- 30
- 31
- 32
- 33
- 34
- 35
- 36
- 37
- 38
- 39
- 40
- 41
- 42
- 43
- 44
- 45
- 46
- 47
- 48
- 49
- 50
- 51
- 52
- 53
- 54
- 55
- 56
- 57
- 58
- 59
- 60

- 1
- 2
- 3 40. Daube M, Moodie R, McKee M. Towards a smoke-free world? Philip Morris
- 4 International's new foundation is not credible. *Lancet* 2017; 390: 1722-4.
- 5 41. Yoon S, Lam T-H. The alcohol industry lobby and Hong Kong's zero wine and beer
- 6 tax policy. *BMC Public Health* 2012; 12: 717.
- 7 42. Kapilashrami A, Smith KE, Fustukian S, et al. Social movements and public health
- 8 advocacy in action: the UK people's health movement. *J Public Health (Oxf)* 2016;
- 9 38: 413-6.
- 10 43. Capewell S, Cairney P, Clarke A. Head to head: should action take priority over
- 11 further research on public health? *BMJ* 2018; 360: k292.
- 12 44. Smith KE, Stewart EA. Academic advocacy in public health: disciplinary 'duty' or
- 13 political 'propaganda'? *Soc Sci Med* 2017; 189: 35-43.
- 14 45. Schafer P. Community-academic partnerships and social change. In O'Campo P,
- 15 Dunn JR, editors. *Rethinking social epidemiology: towards a science of change*.
- 16 Dordrecht: Springer Netherlands, 2011; pp. 285-304.
- 17 46. Ollila E. Health in all policies: from rhetoric to action. *Scand J Public Health* 2011; 39
- 18 (Suppl 6): 11-8.
- 19
- 20
- 21
- 22
- 23
- 24
- 25
- 26
- 27
- 28
- 29
- 30
- 31
- 32
- 33
- 34
- 35
- 36
- 37
- 38
- 39
- 40
- 41
- 42
- 43
- 44
- 45
- 46
- 47
- 48
- 49
- 50
- 51
- 52
- 53
- 54
- 55
- 56
- 57
- 58
- 59
- 60

21

**TABLES****Table 1. Conceptual search strategy**

|                                                                                                                                                                                                                                                                             |
|-----------------------------------------------------------------------------------------------------------------------------------------------------------------------------------------------------------------------------------------------------------------------------|
| ((democracy OR autocracy OR welfare regime OR welfare state OR welfare capitalism OR politics OR political tradition OR internationality OR globalization) AND (health OR health services OR population health OR public health OR health economics OR health expenditure)) |
|-----------------------------------------------------------------------------------------------------------------------------------------------------------------------------------------------------------------------------------------------------------------------------|

**FIGURE LEGENDS**

**Figure 1.** Accumulation of evidence on the political determinants of population health over time.

**Figure 2.** PRISMA 2009 flow diagram.

1  
2  
3  
4  
5  
6  
7  
8  
9  
10  
11  
12  
13  
14  
15  
16  
17  
18  
19  
20  
21  
22  
23  
24  
25  
26  
27  
28  
29  
30  
31  
32  
33  
34  
35  
36  
37  
38  
39  
40  
41  
42  
43  
44  
45  
46  
47  
48  
49  
50  
51  
52  
53  
54  
55  
56  
57  
58  
59  
60

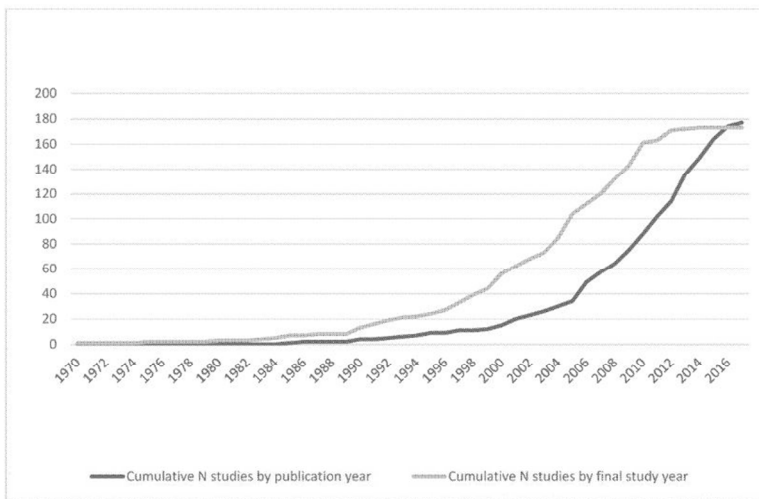

Accumulation of evidence on the political determinants of population health over time.

89x51mm (300 x 300 DPI)

Review only

1  
2  
3  
4  
5  
6  
7  
8  
9  
10  
11  
12  
13  
14  
15  
16  
17  
18  
19  
20  
21  
22  
23  
24  
25  
26  
27  
28  
29  
30  
31  
32  
33  
34  
35  
36  
37  
38  
39  
40  
41  
42  
43  
44  
45  
46  
47  
48  
49  
50  
51  
52  
53  
54  
55  
56  
57  
58  
59  
60

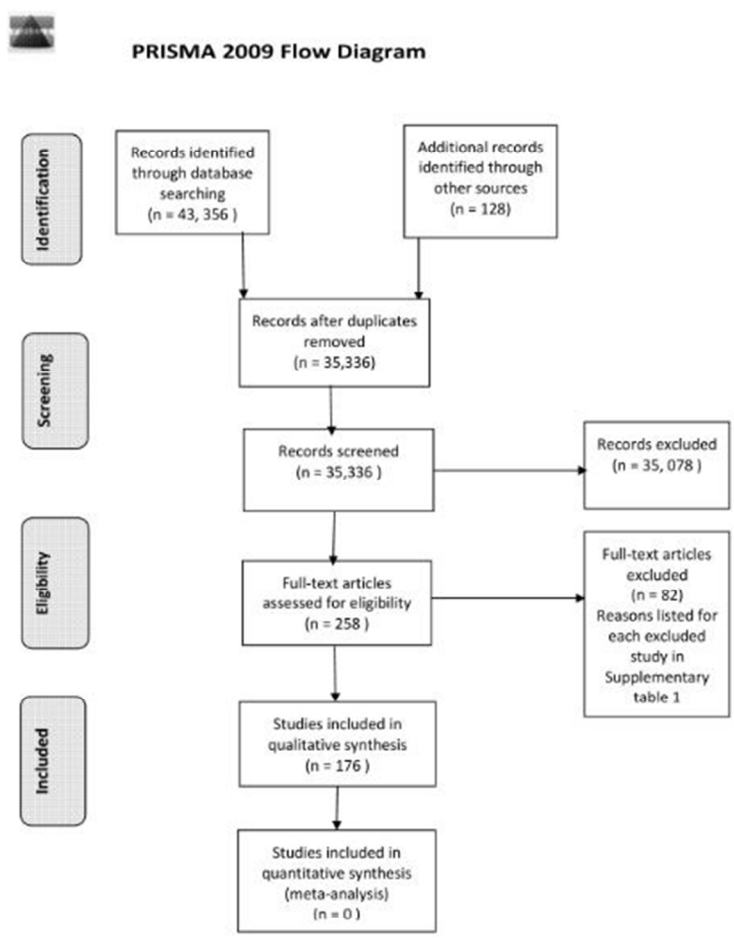

From: Moher D, Liberati A, Tetzlaff J, Altman DG, The PRISMA Group (2009). Preferred Reporting Items for Systematic Reviews and Meta-Analyses: The PRISMA Statement. PLoS Med 6(7): e1000097. doi:10.1371/journal.pmed1000097

For more information, visit [www.prisma-statement.org](http://www.prisma-statement.org).

PRISMA 2009 flow diagram.

48x63mm (300 x 300 DPI)

**Supplementary file 1. Devolution and health systems: examples of the differences in health provision between Scotland and England**

| <b>Scotland</b>                                                                                                      | <b>England</b>                              |
|----------------------------------------------------------------------------------------------------------------------|---------------------------------------------|
| <b>Free dental checks at 6-monthly intervals (although there is a charge for treatment)</b>                          | <b>Dental check costs £20.60</b>            |
| <b>Free NHS prescriptions</b>                                                                                        | <b>Prescription costs £8.60</b>             |
| <b>Free NHS eye tests</b>                                                                                            | <b>Commercial eye tests</b>                 |
| <b>Free personal and nursing care upon assessed need</b>                                                             | <b>Commercial care</b>                      |
| <b>Public health is NHS-run</b>                                                                                      | <b>Public health is local authority-run</b> |
| <b>Offers a free baby box scheme, supplying parents of newborn children with around 40 different essential items</b> | <b>No baby box scheme</b>                   |
| <b>Minimum alcohol unit pricing (implementation date 1 May 2018)</b>                                                 | <b>No minimum alcohol unit pricing</b>      |

All information correct at time of writing. Certain services that are chargeable in England are offered free of charge to those on certain state benefits, but are not universally free.

Table adapted from a slide from the following conference presentation by the lead author of this manuscript Dr Max Barnish: "Barnish M. Health policy and the politics of being an early career researcher. Invited oral presentation, Early Career Researchers Workshop, Society for Social Medicine Annual Scientific Meeting, Manchester, UK, 2017". The copyright to this slide is held by Dr Barnish.



## Supplementary file 2. Full MEDLINE search strategy

Platform: OVID

Version: Ovid MEDLINE(R) In-Process & Other Non-Indexed Citations and Ovid MEDLINE(R) 1946 to Present

Notes:

1. .mp indicates a keyword
2. In capitals followed by / indicates a MeSH term
3. exp indicates a MeSH term is exploded to encompass all subcategories, this was done by default

Search string:

(democracy.mp OR democratic.mp OR exp DEMOCRACY/ OR autocracy.mp OR autocratic.mp OR "welfare regime".mp OR exp SOCIAL WELFARE/ OR "welfare state".mp OR "welfare capitalism".mp OR politics.mp OR political.mp OR exp POLITICS/ OR "political tradition".mp OR globalisation.mp OR globalization.mp OR internationality.mp OR exp INTERNATIONALITY/)

AND

(health.mp OR exp HEALTH/ OR "health services".mp OR exp HEALTH SERVICES/ OR "population health".mp OR exp POPULATION HEALTH/ OR "public health".mp OR exp PUBLIC HEALTH/ OR "health economic".mp OR "health economics.mp" OR "health expenditure".mp OR "health expenditures.mp" OR exp HEALTH EXPENDITURES/ )

Limits: English language

**Supplementary file 3. List of all publications included in the review**

1. Ades F, Senterre C, de Azambuja E, et al. Discrepancies in cancer incidence and mortality and its relationship to health expenditure in the 27 European Union member states. *Ann Oncol* 2013; 24: 2897-902.
2. Adeyi O, Chellaraj G, Goldstein E, et al. Health status during the transition in Central and Eastern Europe: Development in reverse? *Health Policy Plan* 1997; 12: 132-45.
3. Akinci F, Hamidi S, Suvankulov F, et al. Examining the impact of health care expenditures on health outcomes in the Middle East and N. Africa. *J Health Care Finance* 2014; 41(1): 1-23.
4. Alvarez-Dardet C, Franco-Giraldo A. Democratisation and health after the fall of the Wall. *J Epidemiol Community Health* 2006; 60: 669-71.
5. Avendano M, Juerges H, Mackenbach JP. Educational level and changes in health across Europe: longitudinal results from SHARE. *J Eur Soc Policy* 2009; 19: 301-16.
6. Bambra C, Lunau T, van der Wel KA, et al. Work, health, and welfare: the association between working conditions, welfare states, and self-reported general health in Europe. *Int J Health Serv* 2014; 44: 113-36.
7. Bambra C, Pope D, Swami V, et al. Gender, health inequalities and welfare state regimes: a cross-national study of 13 European countries. *J Epidemiol Community Health* 2009; 63: 38-44.
8. Bambra C, Eikemo TA. Welfare state regimes, unemployment and health: a comparative study of the relationship between unemployment and self-reported health in 23 European countries. *J Epidemiol Community Health* 2009; 63: 92-8.
9. Bambra C. Health status and the worlds of welfare. *Soc Policy Soc* 2006; 5: 53-62.
10. Bambra C. Cash versus services: 'worlds of welfare' and the decommodification of cash benefits and health care services. *J Soc Policy* 2005; 34: 195-213.
11. Batniji R, Khatib L, Cammett M, et al. Governance and health in the Arab world. *Lancet* 2014; 383: 343-55.
12. Baum MA, Lake DA. The political economy of growth: democracy and human capital, *Am J Pol Sci* 2003; 47: 333-47.
13. Bentley RJ, Pevalin D, Baker E, et al. Housing affordability, tenure and mental health in Australia and the United Kingdom: a comparative panel analysis. *Housing Studies* 2016; 31: 208-22.
14. Bergh A, Nilsson T. Good for living? On the relationship between globalization and life expectancy. *World Dev* 2010; 38: 1191-1203.
15. Besley T, Kudamatsu M. Health and democracy. *Am Econ Rev* 2006; 96: 313-18.
16. Bosdriez JR, Willemsen MC, Stronks K, et al. Tobacco control policy development in the European Union: do political factors matter? *Eur J Public Health* 2015; 25: 190-4.
17. Borrell C, Espelt A, Rodriguez-Sanz M, et al. Analysing differences in the magnitude of socioeconomic inequalities in self-perceived health by countries of different political tradition in Europe. *Int J Health Serv* 2009; 39: 321-41.
18. Bozorgmehr K, Sebastian M. 2014. Trade liberalization and tuberculosis incidence: a longitudinal multi-level analysis in 22 high burden countries between 1990 and 2010. *Health Policy Plan* 2014; 29: 328-51.
19. Bradley EH, Elkins BR, Herrin J, et al. Health and social services expenditures: associations with health outcomes. *BMJ Qual Saf* 2011; 20: 826-831.
20. Brandt M, Hank K. Scars that will not disappear: long-term associations between early and later life unemployment under different welfare regimes. *J Soc Policy* 2014; 43: 727-43.

21. Bremberg SG. The rate of country-level improvements of the infant mortality rate is mainly determined by previous history. *Eur J Public Health* 2016; 26: 597-601.
22. Burroway R. Democracy and child health in developing countries. *Int J Comparat Sociol* 2016; 57: 338-64.
23. Burstrom B, Whitehead M, Clayton S, et al. Health inequalities between lone and couple mothers and policy under different welfare regimes – the example of Italy, Sweden and Britain. *Soc Sci Med* 2010; 70: 912–20.
24. Cereseto S, Waitzkin, H. Economic-development, political-economic system, and the physical quality-of-life. *Am J Public Health* 1986; 76: 661–66.
25. Chuang Y-C, Sung P-W, Chao HJ, et al. A longitudinal ecological study of the influences of political, economic, and health services characteristics on under-five mortality in less-developed countries. *Health Place* 2013; 23: 111-21.
26. Chuang K-Y, Sung P-W, Chang C-J, et al. Political and economic characteristics as moderators of the relationship between health services and infant mortality in less-developed countries. *J Epidemiol Community Health* 2013; 67: 1006-12.
27. Chung H, Muntaner C. Welfare state matters: a typological multilevel analysis of wealthy countries. *Health Policy* 2007; 80:328–39.
28. Chung H. Muntaner C. Political and welfare state determinants of infant and child health indicators: an analysis of wealthy countries. *Soc Sci Med* 2006; 63: 829–42.
29. Conley D, Springer KW. Welfare state and infant mortality. *Am J Sociol* 2001; 107: 768–807.
30. Copeland A, Bambra C, Nylén L, et al. All in it together? The effects of recession on population health and health inequalities in England and Sweden, 1991-2010. *Int J Health Serv* 2015; 45: 3-24.
31. Correa H, Namkoong K. Determinants and effects of health policy. *Journal Policy Model* 1992; 14: 41–63.
32. Corsi DJ, Subramanian SV. Association between coverage of maternal and child health interventions, and under-5 mortality: a repeated cross-sectional analysis of 35 sub-Saharan African countries. *Glob Health Action* 2014; 7: 24765.
33. Costa-Font J, Mas N. ‘Globesity’? The effects of globalization on obesity and caloric intake. *Food Policy* 2016; 64: 121-32.
34. Craveiro D. Ties and inequalities in later life: welfare state regime and the role of social networks in health inequalities in later life in Europe. *Eur Soc* 2017; 19: 268-71.
35. Cross P, Edwards RT, Opondo M, et al. Does farm worker health vary between localised and globalised food supply systems? *Environ Int* 2009; 35: 1004-14.
36. De Vogli RD, Kouvonen A, Elovainio M, et al. Economic globalization, inequality and body-mass index: a cross-national analysis of 127 countries. *Crit Public Health* 2014; 24: 7-21.
37. Dahl E, van der Wel KA. Educational inequalities in health in European welfare states: a social expenditure approach. *Soc Sci Med* 2013; 81:60–9.
38. Dahl E, Fritzell J, Lahelma E, et al. Welfare state regimes and health inequalities. In Siegrist J, Marmot, M, editors. *Social Inequalities in Health: New Evidence and Policy Implications*. Oxford: Oxford University Press; 2006.
39. Deeming C, Hayes D. Worlds of welfare capitalism and wellbeing: a multilevel analysis. *J Soc Policy* 2012; 41: 811-29.
40. Devaux M. Income-related inequalities and inequities in health care services utilisation in 18 selected OECD countries. *Eur J Health Econom* 2015; 16: 21-33.
41. Dietrich S, Bernhard M. State or regime? The impact of institutions on welfare outcomes. *Eur J Develop Res* 2015; 28: 252-69.

- 1
- 2
- 3 42. Doherty AM, Kelly BD. Social and psychological correlates of happiness in 17
- 4 European countries. *Irish J Psychol Med* 2010; 27(3): 130-4.
- 5 43. Dragano N, Siegrist J, Wahrendorf M. Welfare regimes, labour policies and
- 6 unhealthy psychosocial working conditions: a comparative study with 9917 older
- 7 employees from 12 European countries. *J Epidemiol Community Health* 2010; 65:
- 8 793-9.
- 9 44. Dujardin C, Farfan-Portet M-I, Mitchell R, et al. Does country influence the health
- 10 burden of informal care? An international comparison between Belgium and Great
- 11 Britain. *Soc Sci Med* 2011; 73: 1123-32.
- 12 45. Eikemo TA, Bambra C, Judge K, et al. Welfare state regimes and differences in self-
- 13 perceived health in Europe: a multilevel analysis. *Soc Sci Med* 2008; 66: 2281-95.
- 14 46. Eikemo TA, Huisman M, Bambra C, et al. Health inequalities according to
- 15 educational level in different welfare regimes: a comparison of 23 European
- 16 countries. *Sociol Health Illn* 2008; 30: 565-82.
- 17 47. Elgar FJ, Aitken N. Income inequality, trust and homicide in 33 countries. *Eur J*
- 18 *Public Health* 2011; 21; 241-6.
- 19 48. Elola J, Daponte A, Navarro V. Health indicators and the organization of healthcare
- 20 systems in Western Europe. *Am J Public Health* 1995; 85: 1397-1401.
- 21 49. Engster D, Stensöta HO. Do family policy regimes matter for children's well-being?
- 22 *Soc Polit* 2011, 18(1):82-124.
- 23 50. Esmaeli A, Mansouri S, Moshavash M. Income inequality and population health in
- 24 Islamic countries. *Public Health* 2011; 125: 577-84.
- 25 51. Espelt A, Borrell C, Rodriguez-Sanz, M, et al. Inequalities in health by social class
- 26 dimensions in European countries of different political traditions. *Int J Epidemiol*
- 27 2008; 37: 1095-1105.
- 28 52. Esser I, Palme J. Do public pensions matter for health and wellbeing among retired
- 29 persons? Basic and income security pensions across 13 Western European
- 30 countries. *Int J Soc Welfare* 2010; 19: S103-20.
- 31 53. Estimé MS, Lutz B, Strobel F. Trade as a structural driver of dietary risk factors for
- 32 noncommunicable diseases in the pacific: an analysis of household income and
- 33 expenditure survey data. *Globalization Health* 2014; 10: 48.
- 34 54. Fan VY, Faioso Le'au R. Insights in public health: a tale of two polities: health in
- 35 Independent and American Samoa. *Hawai'i J Med Public Health* 2015; 74: 179-84.
- 36 55. Farfan-Portet M, Popham F, Mitchell R, et al. Caring, employment and health among
- 37 adults of working age: evidence from Britain and Belgium. *Eur J Public Health* 2010;
- 38 20: 52-7.
- 39 56. Fayissa B. The determinants of infant and child mortality in developing countries: the
- 40 case of Sub-Sahara Africa. *Rev Black Polit Econ* 2001; 29: 83-100.
- 41 57. Foubert J, Levecque K, van Rossem R, et al. Do welfare regimes influence the
- 42 association between disability and self-perceived health? A multilevel analysis of 57
- 43 countries. *Soc Sci Med* 2014; 117: 10-7.
- 44 58. Franco A, Alvarez-Dardet C, Ruiz MT. Effect of democracy on health: ecological
- 45 study, *BMJ* 2004; 329: 1421-23.
- 46 59. Frey RS, Al-Roumi A. Political democracy and the physical quality of life: the cross-
- 47 national evidence. *Soc Indic Res* 1999; 47: 73-97.
- 48 60. Fritzell S, Vannoni F, Whitehead M, et al. Does non-employment contribute to the
- 49 health disadvantage among lone mothers in Britain, Italy and Sweden? Synergy
- 50 effects and the meaning of family policy. *Health Place* 2012; 18: 199-208.
- 51 61. Fritzell J, Kangas O, Bacchus Hertzman J, et al. Cross-temporal and cross-national
- 52 poverty and mortality rates among developed countries. *J Environ Public Health*
- 53 2013; 2013: 915490.
- 54
- 55
- 56
- 57
- 58
- 59
- 60

62. Fumagalli E, Mentzakis E, Suhrcke M. Do political factors matter in explaining under- and overweight outcomes in developing countries. *J Socioecon* 2013; 46: 48-56.
63. Gauri V, Khaleghian P. Immunization in developing countries: its political and organizational determinants, *World Dev* 2002; 30: 2109–32.
64. Gerring J, Thacker SC. Do neoliberal economic policies kill or save lives? *Bus Polit* 2008; 10: 1-33.
65. Gesthuizen M, Huijts T, Kraaykamp G. Explaining health marginalisation of the lower educated: the role of cross-national variations in health expenditure and labour market conditions. *Sociol Health Illn* 2012, 34:591–607.
66. Ghobarah HA, Huth P, Russett, B. Comparative public health: the political economy of human misery and well-being. *Int Stud Q* 2004; 48: 73–94.
67. Gilligan AM, Skrepnek GH. Determinants of life expectancy in the Eastern Mediterranean Region. *Health Policy Plan* 2015; 30, 624-37.
68. Gizelis T. Wealth alone does not buy health: political capacity, democracy, and the spread of AIDS. *Polit Geogr* 2009; 28: 121–31.
69. Glass J, Andersson MA, Simon RW. Parenthood and happiness: effects of work-family reconciliation policies in 22 OECD countries. *Am J Sociol* 2016; 122, 886-929.
70. Goryakin Y, Lobstein T, James WPT, et al. The impact of economic, political and social globalization on overweight and obesity in the 56 low and middle income countries. *Soc Sci Med* 2015; 133: 67-76.
71. Granados JAT. Politics and health in eight European countries: a comparative study of mortality decline under social democracies and right-wing governments. *Soc Sci Med* 2010; 71: 841-50.
72. Grosse Frie K, Eikemo TA, Knesebeck OvD. Education and self-reported health care seeking behaviour in European welfare regimes: results from the European Social Survey. *Int J Public Health* 2010; 55: 217–20.
73. Guarnizo-Herreño CC, Tsakos G, Sheiham A, et al. Oral health and welfare state regimes: a cross-national analysis of European countries. *Eur J Oral Sci* 2013; 121: 169-75.
74. Harding S, Lenguerrand E, Costa G, et al. Trends in mortality by labour market position around retirement ages in three European countries with different welfare regimes. *Int J Public Health* 2013; 58: 99-108.
75. Hájek O, Grebeníček P, Popesko B, et al. Czech Republic vs EU-27: economic level, health care and population health. *Cent Eur J Public Health* 2012; 20(3): 167-73.
76. Hauck K, Martin S, Smith PC. Priorities for action on the social determinants of health: empirical evidence on the strongest associations with life expectancy in 54 low-income countries, 1990-2012. *Soc Sci Med* 2016; 167: 88-98.
77. Heijink R, Koolman X, Westert GP. Spending more money, saving more lives? The relationship between avoidable mortality and healthcare spending in 14 countries. *Eur J Health Econ* 2013; 14: 527-38.
78. Hoffman R. Socioeconomic inequality in old-age mortality: a comparison of Denmark and the USA. *Soc Sci Med* 2011; 72: 1986-92.
79. Houweling TAJ, Caspar AEK, Looman WN, et al. Determinants of under-5 mortality among the poor and the rich: a cross-national analysis of 43 developing countries. *Int J Epidemiol* 2005; 34: 1257–65.
80. Huijts T, Perkins JM, Subramanian SV. Political regimes, political ideology and self-rated health in Europe: a multilevel analysis. *PLoS One* 2010; 5: e11711.
81. Jolly CM, Namugabo E, Nguyen G, et al. Net food imports and obesity in selected Latin American & Caribbean countries. *Adv Manag Appl Econom* 2013; 3(6); 159-77.

- 1  
2  
3 82. Jorgenson AK. Foreign direct investment and the Environment, the mitigating  
4 influence of Institutional and Civil Society factors, and relationships between  
5 industrial pollution and human health a panel study of less-developed countries.  
6 *Organ Environ* 2009; 22: 135-57.
- 7 83. Jorgenson AK. Political-economic integration, industrial pollution and human health:  
8 a panel study of less-developed countries, 1980-2000. *Int. Sociol* 2009; 24: 115-43.
- 9 84. Karim SA, Eikemo TA, Bamba C. Welfare state regimes and population health:  
10 integrating the East Asian welfare states. *Health Policy* 2010; 94: 45-53.
- 11 85. Kick EL, Nasser R, Davis BL, et al. Militarization and infant-mortality in the third-  
12 world. *J Polit Militar Sociol* 1990; 18: 285-305.
- 13 86. Klenk J, Keil U, Jaensch A, et al. Changes in life expectancy 1950-2010:  
14 contributions from age- and disease-specific mortality in selected countries.  
15 *Population Health Metrics* 2016; 14: 20.
- 16 87. Klomp J, de Haan J. Effects of governance on health: a cross-national analysis of  
17 101 Countries. *Kyklos* 2008; 61: 599-614.
- 18 88. Klomp J, de Haan, J. Is the political system really related to health? *Soc Sci Med*  
19 2009; 69: 36-46.
- 20 89. Krueger PM, Dovel K, Denney JT. Democracy and self-rated health across 67  
21 countries: a multilevel analysis. *Soc Sci Med* 2015; 143: 137.
- 22 90. Kudamatsu M. Has democratization reduced infant mortality in sub-Saharan Africa?  
23 *J Eur Econ Assoc* 2012; 10: 1294-317.
- 24 91. Kouvo A, Räsänen P. Foundations of subjective well-being in turbulent times: a  
25 comparison of four European countries. *Int J Sociol Soc Policy* 2015; 35: 2-17.
- 26 92. Lahelma E, Arber S. Health inequalities among men and women in contrasting  
27 welfare states: Britain and three Nordic countries compared. *Eur J Public Health*  
28 1994; 37: 213-26.
- 29 93. Lake DA, Baum MA. The invisible hand of democracy – political control and the  
30 provision of public services. *Comp Polit Stud* 2001; 34: 587-621.
- 31 94. Lena HF, London B. The political and economic-determinants of health outcomes –  
32 a cross-national analysis. *Int J Health Serv* 1993; 23: 585-602.
- 33 95. Levecque K, van Rossem R, de Boyser K, et al. Economic hardship and depression  
34 across the life course: the impact of welfare state regimes. *J Health Soc Behav*  
35 2011; 52: 262-76.
- 36 96. Levecque K, Van Rossem R. Depression in Europe: does migrant integration have  
37 mental health payoffs? A cross-national comparison of 20 European countries. *Ethn*  
38 *Health* 2015; 20: 49-65.
- 39 97. Levine DI, Rothman D. Does trade affect child health? *J Health Econ* 2006; 25: 538-  
40 54.
- 41 98. Lin R-T, Chen Y-M, Chien L-C, et al. Political and social determinants of life  
42 expectancy in less developed countries: a longitudinal study. *BMC Public Health*  
43 2012; 12: 85
- 44 99. Lin R-T, Chien L-C, Chen Y-M, et al. Governance matters: an ecological association  
45 between governance and child mortality. *Int Health* 2014; 6: 249-57.
- 46 100. London B, Williams BA. National politics, international dependency, and basic  
47 needs provision – a cross-national analysis. *Soc Forces* 1990; 69: 565-84.
- 48 101. López-Casasnovas G, Soley-Bori M. The socioeconomic determinants of  
49 health: economic growth and health in the OECD countries during the last three  
50 decades. *Int J Environ Res Public Health* 2014; 11: 815-29.
- 51 102. Lundberg O, Yngwe MA, Stjerne MK, et al. The role of welfare state principles  
52 and generosity in social policy programmes for public health: an international  
53 comparative study. *Lancet* 2008; 372: 1633-40.
- 54  
55  
56  
57  
58  
59  
60

103. McKinnon B, Harper S, Kaufman JS. Do socioeconomic inequalities in neonatal mortality reflect inequalities in coverage of maternal health services? Evidence from 48 low- and middle-income countries. *Matern Child Health J* 2016; 20: 434-6.
104. Mackenbach JP. Political conditions and life expectancy in Europe, 1990-2008. *Soc Sci Med* 2013; 82: 134-46.
105. Mackenbach JP, Hu Y, Looman CWN. Democratization and life expectancy in Europe, 1960-2008. *Soc Sci Med* 2013; 93: 166-75.
106. Mackenbach JP, McKee M. A comparative analysis of health policy performance in 43 European countries. *Eur J Public Health* 2013; 23: 195-201.
107. Martens P, Akin SM, Maud H, et al. Is globalization healthy: a statistical indicator analysis of the impacts of globalization on health. *Glob. Health* 2010; 6:16.
108. Maynard G. Neoliberal trade and investment policies, the ITGA and youth smoking rates: a cross-national analysis of developing nations. *Sociol Spectr* 2015; 35: 419-41.
109. Maynard G. Health international non-governmental organizations, democracy, and tuberculosis mortality in developing nations: a longitudinal analysis. *Sociol Spectr* 2016; 36: 303-20.
110. Miething A, Lundberg O, Geyer S. Income and health in different welfare contexts: a comparison of Sweden, East and West Germany. *Scand J Public Health* 2013; 41: 260-8.
111. Menon-Johansson MA. Good governance and good health: the role of societal structures in the human immunodeficiency virus pandemic. *BMC Int Health Hum Rights* 2005; 5: 96-111.
112. Milner A, McLure R, Sun J, et al. Globalization and suicide: an empirical investigation in 35 countries over the period 1980-2006. *Health Place* 2011; 17: 996-1003.
113. Minagawa Y. Inequalities in healthy life expectancy in Eastern Europe. *Populat Dev Rev* 2013; 39: 649-71.
114. Moon BE, Dixon WJ. Politics, the state, and basic human-needs – a cross-national-study. *Am J Polit Sci* 1985; 29: 661-94.
115. Moor N, de Graaf PM, Komter A. Family, welfare state generosity and the vulnerability of older adults: a cross-national survey. *J Aging Stud* 2013; 27: 347-57.
116. Moore S, Teixeira AC, Shiell, A. The health of nations in a global context: trade, global stratification, and infant mortality rates. *Soc Sci Med* 2006; 63: 165-78.
117. Mukherjee N, Kriekhaus J. Globalization and human well-being. *Int Polit Sci Rev* 2012; 33(2): 150-70.
118. Muldoon KA, Galway LP, Nakajima M, et al. Health system determinants of infant, child and maternal mortality: a cross-sectional study of UN member countries. *Global Health* 2011; 7:42.
119. Muntaner C, Davis O, Mclsaack K, et al. Retrenched welfare regimes still lessen social class inequalities in health: a longitudinal analysis of the 2003-2010 EU-SILC in 23 European countries. *Int J Health Serv* 2017; 47: 410-31.
120. Muntaner C, Borrell C, Kunst A, et al. Social class inequalities in health: does welfare state regime matter? In Raphael D, Bryant T, Rioux MH, editors. *Staying alive: critical perspectives on health, illness, and health care*. Toronto: Canadian Scholars Press; 2006.
121. Muntaner C, Lynch JW, Hillemeier M, et al. Economic inequality, working-class power, social capital, and cause-specific mortality in wealthy countries. *Int J Health Serv* 2002; 32: 629-56.

122. Navarro V, Muntaner C, Borrell C, et al. Politics and health outcomes. *Lancet* 2006; 368: 1033–37.
123. Navarro V, Borrell C, Benach J, et al. The importance of the political and the social in explaining mortality differentials among the countries of the OECD, 1950–1998. *Int J Health Serv* 2003; 33: 419–94.
124. Navarro V, Shi LY. The political context of social inequalities and health. *Int J Health Serv* 2001; 31: 1–21.
125. Navia P, Zweifel TD. Democracy, dictatorship, and infant mortality revisited. *J Democracy* 2003; 14: 90–103.
126. Nelson K, Fritzell J. Welfare states and population health: the role of minimum income benefits for mortality. *Soc Sci Med* 2014; 112: 63–71.
127. Nordenmark M, Strandh M, Layte R. The impact of unemployment benefit system on the mental well-being of the unemployed in Sweden, Ireland and Great Britain. *Eur Societies* 2006; 8: 83–110.
128. Novignon J, Olakojo SA, Novignon J. The effects of public and private health care expenditure on health status in sub-Saharan Africa: new evidence from panel data analysis. *Health Econ Rev* 2012; 2: 22.
129. Oberlander L, Disdier A-C, Etilé F. Globalisation and national trends in nutrition and health: A grouped fixed-effects approach to intercountry heterogeneity. *Health Econ* 2017; 26: 1146–61.
130. Olafsdottir S. Fundamental causes of health disparities: stratification, the welfare state, and health in the United States and Iceland. *J Health Soc Behav* 2007; 48: 239–253.
131. Olsen KM, Dahl SA. Health differences between European countries. *Soc Sci Med* 2007, 64: 1665–78.
132. Oster E. Routes of infection: exports and HIV incidence in sub-Saharan Africa. *J Eur Econ Assoc* 2012; 10: 1025–58.
133. Ouweneel P. Social security and well-being of the unemployed in 42 nations. *J Happiness Stud* 2002; 3: 167–92.
134. Owen AL, Wu S. Is trade good for your health? *Rev Int Econ* 2007; 15: 660–82.
135. Palència L, Malmusi D, de Moortel D, et al. The influence of gender equality policies on gender inequalities in health in Europe. *Soc Sci Med* 2013; 117: 25–33.
136. Pickett KE, Wilkinson RG. Child wellbeing and income inequality in rich countries: ecological cross sectional study. *BMJ* 2007; 335: 1080.
137. Pillai VK, Gupta R. Cross-national analysis of a model of reproductive health in developing countries. *Soc Sci Res* 2006; 35: 210–27.
138. Pinzón-Flórez CE, Fernández-Niño JA, Ruiz-Rodríguez M, et al et al. Determinants of performance of health systems concerning maternal and child health: a global approach. *PLoS ONE* 2015; 10: e0120747.
139. Platts LG. A prospective analysis of labour market status and self-rated health in the UK and Russia. *Econ Transit* 2015; 23(2): 343–70.
140. Ploubidis GB, Dale C, Grundy E. Later life health in Europe: how important are country level influences? *Eur J Ageing* 2012; 9:5–13.
141. Popham F, Dibben C, Bambra C. Are health inequalities really not the smallest in the Nordic welfare states? A comparison of mortality inequality in 37 countries. *J Epidemiol Community Health* 2013; 67: 412–8.
142. Raphael D, Bryant T. The welfare state as a determinant of women's health: support for women's quality of life in Canada and four comparison nations. *Health Policy* 2004; 68: 63–79.



143. Reeves A, Basu S, McKee M, et al. Social protection and tuberculosis control in 21 European countries, 1995-2012: a cross-national statistical modelling analysis. *Lancet Infect Dis* 2014; 14: 1105-12.
144. Richter M, Rathman K, Nic Gabhainn S, et al. Welfare state regimes, health and health inequalities in adolescence: a multilevel study in 32 countries. *Sociol Health Illn* 2012; 34: 858-79.
145. Ross M. Is democracy good for the poor? *Am J Polit Sci* 2006; 50: 860-74.
146. Rostila M. Social capital and health in European welfare regimes: a multilevel approach. *J Eur Soc Policy* 2007; 17: 223-39.
147. Rovny AE. Welfare state policy determinants of fertility level: a comparative analysis. *J Eur Soc Policy* 2011; 21: 335-47.
148. Rudra N, Haggard S. Globalization, democracy, and effective welfare spending in the developing world. *Comp Polit Stud* 2005; 38: 1015-49.
149. Sacker A, Worts D, McDonough P. Social influences on trajectories of self-rated health: evidence from Britain, Germany, Denmark and the USA. *J Epidemiol Community Health* 2011; 65:130-6.
150. Safaei J. Is democracy good for health? *Int J Health Serv* 2006; 36: 767-86.
151. Sanders AE, Slade GD, John MT, et al. A cross-national comparison of income gradients in oral health quality of life in four welfare states: application of the Korpi and Palme typology. *J Epidemiol Community Health* 2009; 63: 569-74.
152. Sarti S, Alberio M, Terraneo M. Health inequalities and the welfare state in European families. *J Sociol Soc Welfare Needs* 2013; 40: 103-30.
153. Sekine M, Chandola T, Martikainen P, et al. Socioeconomic inequalities in physical and mental functioning of British, Finnish, and Japanese civil servants: role of job demand, control, and work hours. *Soc Sci Med* 2009; 69: 1417-25.
154. Shandra JM, Shandra CL, London B. Do non-governmental organizations impact health? A cross-national analysis of infant mortality. *Int J Comp Sociol* 2010; 51: 137-164.
155. Shandra JM, Nobles J, London B, et al. Dependency, democracy, and infant mortality: a quantitative, cross-national analysis of less developed countries. *Soc Sci Med* 2004; 59: 321-33.
156. Shen C, Williamson JB. Accounting for cross-national differences in infant mortality decline (1965-1991) among less developed countries: effects of women's status, economic dependency, and state strength. *Soc Ind Res* 2001; 53: 257-88.
157. Shen C, Williamson JB. Child mortality, women's status, economic dependency, and state strength: a cross-national study of less developed countries. *Social Forces* 1997; 76: 667-700.
158. Shim J. Social welfare expenditures and infant mortality. *Soc Work Public Health* 2015; 30: 567-77.
159. Stavrova O, Schlösser T, Fetchenhauer D. Are the unemployed equally unhappy all over the world? The role of the social norms to work and welfare state provision in 28 OECD countries. *J Econ Psychol* 2011; 32: 159-71.
160. Stroup MD. Economic freedom, democracy, and the quality of life. *World Dev* 2007; 35: 52-66.
161. Stuckler D, Basu S, McKee M. Budget crises, health, and social welfare programmes. *BMJ* 2010, 340:c3311.
162. Tsai MC. Does political democracy enhance human development in developing countries? A cross-national analysis. *Am J Econ Sociol* 2006; 65: 233-68.

163. Van der Heuvel M, Hopkins J, Biscaro A, et al. A comparative analysis of early child health and development services and outcomes in countries with different redistributive policies. *BMC Public Health* 2013; 13: 1049.
164. Van der Wel KA, Dahl E, Thielen K. Social inequalities in 'sickness': European welfare states and non-employment among the chronically ill. *Soc Sci Med* 2011; 73: 1608-17.
165. Van Tuyckom C. Macro-environmental factors associated with leisure-time physical activity: a cross-national analysis of EU countries. *Scand J Public Health* 2011; 39: 419-26.
166. Vahid Shahidi F, Siddiqi A, Muntaner C. Does social policy moderate the impact of unemployment on health? A multilevel analysis of 23 welfare states. *Eur J Public Health*. *Eur J Public Health* 2016; 26: 1017-22.
167. Veenhoven R. Well-being in the welfare state. *J Comp Policy Anal* 2000; 2: 91-125.
168. Veenhoven R, Ouwenel P. Livability of the welfare-state – appreciation-of-life and length-of-life in nations varying in state-welfare-effort. *Soc Indic Res* 1995; 36: 1-48.
169. Vöörmann R, Helemäe J. A comparative analysis of gender differences in self-rated health: is the Baltic Sea a frontier of the East-West health divide in Europe? *Filosofija-Sociologija* 2013; 24(2): 62-70.
170. Wejnert B. Effect of global democracy on women's reproductive health: 1970-2005, cross-world analysis. *Marriage Fam Rev* 2008; 41 (3-4): 14-37.
171. Whitehead M, Burstrom B, Diderichsen, F. Social policies and the pathways to inequalities in health: a comparative analysis of lone mothers in Britain and Sweden. *Soc Sci Med* 2000; 50: 255-70.
172. Witvliet MI, Kunst A, Arah OA, et al. Sick regimes and sick people: a multilevel investigation of the population health consequences of perceived national corruption. *Trop Med Internat Health* 2013; 18: 1240-7.
173. Wu JCL, Chiang TL. Comparing child mortality in Taiwan and selected industrialized countries. *J Formos Med Assoc.* 2007, 106 (2): 177-180.
174. York R, Bell SE. Life satisfaction across nations: the effects of women's political status and public priorities. *Soc Sci Res* 2014; 48: 48-61.
175. Zambon A, Boyce W, Cois E, et al. Do welfare regimes mediate the effect of socioeconomic position on health in adolescence? A cross-national comparison in Europe, North America, and Israel. *Int J Health Serv* 2006; 36: 309-29.
176. Zweifel TD, Navia P. Democracy, dictatorship, and infant mortality. *J Democracy* 2000; 11: 99-114.

1  
2  
3  
4  
5  
6  
7  
8  
9  
10  
11  
12  
13  
14  
15  
16  
17  
18  
19  
20  
21  
22  
23  
24  
25  
26  
27  
28  
29  
30  
31  
32  
33  
34  
35  
36  
37  
38  
39  
40  
41  
42  
43  
44  
45  
46  
47  
48  
49  
50  
51  
52  
53  
54  
55  
56  
57  
58  
59  
60

**Supplementary file 4. List of all publications excluded at full-text screening, with reasons**

1. Abbott P, Wallace C. Exploring economic and social transformations in post-Soviet Russia, Ukraine and Belarus. *Eur Societies* 2010; 12: 653-74. No eligible comparisons.
2. Aggarwal S. 2010-2012 global health care reforms and their impact on pricing, access and health outcomes strategy. *Value Health* 2012; 15(7): A291. Abstract only.
3. Aldabe B, Anderson R, Lyly-Yrjänäinen, et al. Contribution of material, occupational, and psychosocial factors in the explanation of social inequalities in health in 28 countries in Europe. *J Epidemiol Community Health* 2011; 65: 1123-31. No eligible exposures.
4. Alsan M, Bloom DE, Canning D. The effect of population health on foreign direct investment inflows to low-and middle-income countries. *World Dev* 2006; 34: 613-30. No eligible comparisons.
5. Alves S. Welfare state changes and outcomes – the cases of Portugal and Denmark from a comparative perspective. *Soc Pol Adm* 2015; 49: 1-23. Study design.
6. Amouzou A, Kozuki N, Gwatkin DR. Where is the gap? The contribution of disparities within developing countries to global inequalities in under-five mortality. *BMC Public Health* 2014; 14: 216. No eligible exposures.
7. Arán-Matero D, Amico P, Arán-Fernandez C, et al. Levels of spending and resource allocation to HIV programs and services in Latin America and the Caribbean. *PLoS ONE* 2011; 6: e22373. No eligible comparisons.
8. Arnold RG, Heyworth J, Sáez AE, et al. The status of water and sanitation among Pacific Rim nations. *Rev Environ Health* 2011; 26: 17-30. No eligible comparisons.
9. Atikeler K, Piniakho O. Pricing and reimbursement policies of Turkey and Ukraine. *Value in Health* 2015; 18(7): A573. Abstract only.
10. Azemar C, Desbordes R. Public governance, health and foreign direct investment in sub-Saharan Africa. *J Afr Econ* 2009; 18: 667-709. No eligible comparisons.
11. Balaj M, McNamara CL, Eikemo TA, et al. The social determinants of inequalities in self-reported health in Europe: findings from the European social survey (2014) special module on the social determinants of health. *Eur J Public Health* 2017; 27: 107-14. No eligible comparisons.
12. Basch CH, Samuel L, Ethan D. Obesity, diabetes and heart disease: effects of globalization on population health, preventive efforts, and the importance of social change. *Int J Health Promot Educ* 2013; 51: 185-97. Study design.
13. Basu S, McKee M, Galea G, et al. Relationship of soft drink consumption to global overweight, obesity, and diabetes: a cross-national analysis of 75 countries. *Am J Public Health* 2013; 103: 2071-7. No eligible exposures.
14. Bayati M, Akbarian R, Kavosi Z. Determinants of life expectancy in eastern mediterranean region: a health production function. *Int J Health Policy Manag* 2013; 1: 57-61. No relevant comparisons.
15. Beckfield J, Olafsdottir S, Bakhtiari E. Health inequalities in global context. *Am Behav Sci* 2013; 57: 1014-39. No eligible comparisons.

16. Bernard S, Hotte L, Winer SL. Democracy, inequality and the environment when citizens can mitigate health consequences of pollution privately or act collectively. *Eur J Polit Econ* 2014; 34: 142-56. Study design.
17. Borrell C, Morrison J, Burstrom B, et al. Comparison of health policy documents of European cities: are they oriented to reduce inequalities in health? *J Public Health Policy* 2013; 34: 100-20. Study design.
18. Brady D, Marquandt S, Gauchat G, et al. Path dependency and the politics of socialized health care. *J Health Politics Pol Law* 2016; 41: 355-92. No eligible outcomes.
19. Burstrom B, Whitehead M, Clayton S, et al. Health inequalities between lone and couple mothers and policy under different welfare regimes – the example of Italy, Sweden and Britain. *Soc Sci Med* 2010; 70: 912–20. Duplicate.
20. Carbone G. Do new democracies deliver social welfare? Political regimes and health policy in Ghana and Cameroon. *Democratization* 2012; 19(2): 157-83. No relevant outcomes.
21. Chauvel L, Leist AK. Socioeconomic hierarchy and health gradient in Europe: the role of income inequality and of social origins. *Int J Equity Health* 2015; 14: 132. No eligible exposures.
22. Clark SE, Hawkes C, Murphy SM, et al. Exporting obesity: US farm and trade policy and the transformation of the Mexican consumer food environment. *Int J Occupat Environ Health* 2012; 18: 54-64. No eligible comparisons.
23. Christiansen NV, Kahlmeier S, Racioppi F. Sport promotion policies in the European Union: results of a contents analysis. *Scand J Med Sci Sports* 2014; 24: 428-38. Study design.
24. Chuang K-Y, Sung P-W, Chang C-J, et al. Political and economic characteristics as moderators of the relationship between health services and infant mortality in lessdeveloped countries. *J Epidemiol Community Health* 2013; 67: 1006-12. Duplicate.
25. Cross P, Edwards RT, Nyeko P, et al. The potential impact on farmer health of enhanced export horticultural trade between the U.K. and Uganda. *Int J Environ Res Public Health* 2009; 6: 1539-56. No eligible comparisons.
26. De Andrade LOM, Pellegrini Fillho A, Solar O, et al. Social determinants of health, universal health coverage, and sustainable development.: case studies from Latin American countries. *Lancet* 2015; 385: 1343-51. Study design.
27. De Vogli R, Kouvonen A, Gimeno D. ‘Globesization’: ecological evidence on the relationship between fast food outlets and obesity among 26 advanced economies. *Crit Public Health* 2011; 21: 395-402. No eligible exposures.
28. Docherty WJ, Mendenhall TJ, Berge JM. The Families and Democracy and Citizen Health Care Project. *J Marital Family Ther* 2010; 36: 389-402. No relevant comparisons.
29. Etherington D, Ingold J. Welfare to work and the inclusive labour market: a comparative study of activation policies for disability and long-term sickness claimants in the UK and Denmark. *J Eur Soc Policy* 2012; 22(1): 30-44. No eligible outcomes.
30. Elgar FJ, Davis CG, Wohl MJ, et al. Social capital, health and life satisfaction in 50 countries. *Health Place* 2011; 17, 1044-53. No eligible exposures.
31. Fazel S, Geddes JR, Kushel M. The health of homeless people in high-income countries: descriptive epidemiology, health consequences, and clinical and policy recommendations. *Lancet* 2014; 384, 1529-40. Not primary research.
32. Ferrarini T, Sjöberg O. Social policy and health: transition countries in a comparative analysis. *Int J Soc Welfare* 2010; 19: S60-88. Study design.
33. Friel S, Gleeson D, Thow A-M, et al. A new generation of trade policy: potential risks to diet-related health from the trans pacific partnership agreement. *Global Health* 2013; 9: 46. Study design.

- 1
- 2
- 3
- 4 34. Gregorio LE, Gregorio DI. Polity and health care expenditures: the association among 159
- 5 nations. *J Epidemiol Global Health* 2013; 3: 49-57. No eligible outcomes.
- 6
- 7 35. Gustafsson N-KJ, Ramstedt MR. Changes in alcohol-related harm in Sweden after increasing
- 8 alcohol import quotas and a Danish tax decrease - an interrupted time-series analysis for
- 9 2000-2007. *Int J Epidemiol* 2011; 40, 432-40. No eligible comparisons.
- 10
- 11 36. Habibov NN, Afandi EN. Self-rated health and social capital in transitional countries:
- 12 multilevel analysis of comparative surveys in Armenia, Azerbaijan and Georgia. *Soc Sci Med*
- 13 2011; 72: 1993-204. No eligible exposures.
- 14
- 15 37. Habibov N. Who wants to redistribute? An analysis of 14 post-Soviet nations. *Soc Policy*
- 16 *Admin* 2013; 47: 262-86. No eligible outcomes.
- 17
- 18 38. Harding R, Stasavage D. What democracy does (and doesn't do) for basic services: school
- 19 fees, school inputs, and African elections. *J Politics* 2013; 76: 229-45. No eligible outcomes.
- 20
- 21 39. Herwartz H, Theilen B. Health care and ideology: a reconsideration of political determinants
- 22 of public healthcare funding in the OECD. *Health Econom* 2014; 23, 225-40. No eligible
- 23 outcomes.
- 24
- 25 40. Herwartz H, Theilen B. Partisan influence on social spending under market integration, fiscal
- 26 pressure and institutional change. *Eur J Polit Econ* 2014; 34, 40924. No eligible outcomes.
- 27
- 28 41. Hicken A, Kollman K, Simmons JW. Party system nationalization and the provision of public
- 29 health services. *Polit Sci Res Meth* 2016; 4: 573-94. No eligible exposures.
- 30
- 31 42. Higo M, Khan HTA. Global population aging: unequal distribution of risks in later life between
- 32 developed and developing countries. *Glob Soc Policy* 2015; 15(2): 146-66. Study design.
- 33
- 34 43. Hogan MC, Foreman KJ, Naghavi M, et al. Maternal mortality for 181 countries, 1880-2008: a
- 35 systematic analysis of progress towards Millennium Development Goal 5. *Lancet* 2010; 375,
- 36 1609-23. Study design.
- 37
- 38 44. Huber E, Mustillo T, Stephens JD. Politics and social spending in Latin America. *J Polit* 2008;
- 39 70: 420-36. No eligible outcomes.
- 40
- 41 45. James PD, Wilkins R, Detsky AS, et al. Avoidable mortality by neighbourhood income in
- 42 Canada: 25 years after the establishment of universal health insurance. *J Epidemiol*
- 43 *Community Health*. 2007, 61: 287-96. No eligible comparisons.
- 44
- 45 46. Jensen C. Two sides of the same coin? Left-wing governments and labour unions as
- 46 determinants of public spending. *Socioeconom Rev* 2012; 10: 217-40. No eligible outcomes.
- 47
- 48 47. Jensen C. Marketization via compensation: health care and the politics of the right in
- 49 advanced industrialized nations. *Br J Polit Sci* 2011; 41: 907-26. Study design.
- 50
- 51 48. Kaufman RR, Segura-Ubierno A. Globalization, domestic politics and social spending in Latin
- 52 America: a time-series cross-section analysis, 1973-1997. *Dados* 2001; 44: 435-79. No
- 53 eligible outcomes.
- 54
- 55 49. Kawachi I. Globalization and workers' health. *Ind. Health* 2008; 46: 421-23. Study design.
- 56
- 57 50. Kawiorska D. Healthcare in the light of the concept of welfare state regimes:
- 58 comparative analysis of EU member states. *Oeconomia Coperanicana* 2016; 7: 187206. No
- 59 eligible outcomes.
- 60
- 61 51. Korda RJ, Butler JR, Clements MS, et al. Differential impacts of health care in Australia: trend
- 62 analysis of socioeconomic inequalities in avoidable mortality. *Int J Epidemiol*. 2007; 36: 157-
- 63 165. No eligible comparisons.
- 64
- 65 52. Koutsogeorgou E, Nyqvist F, Nygård M, et al. Social capital and self-rated health among older
- 66 adults: a comparative analysis of Finland, Poland and Spain. *Ageing Soc* 2015; 35: 653-67. No
- 67 eligible exposures.
- 68
- 69 53. Levecque K, van Rossem R, Ronda E, et al. Depression in different welfare state regimes in
- 70 Europe: the role of attitudes towards state responsibility for an adequate standard of living. *J*
- 71 *Epidemiol Community Health* 2011; 65: A126. Abstract only.

- 1
  - 2
  - 3
  - 4
  - 5
  - 6
  - 7
  - 8
  - 9
  - 10
  - 11
  - 12
  - 13
  - 14
  - 15
  - 16
  - 17
  - 18
  - 19
  - 20
  - 21
  - 22
  - 23
  - 24
  - 25
  - 26
  - 27
  - 28
  - 29
  - 30
  - 31
  - 32
  - 33
  - 34
  - 35
  - 36
  - 37
  - 38
  - 39
  - 40
  - 41
  - 42
  - 43
  - 44
  - 45
  - 46
  - 47
  - 48
  - 49
  - 50
  - 51
  - 52
  - 53
  - 54
  - 55
  - 56
  - 57
  - 58
  - 59
  - 60
54. Liang LL, Mirelman AJ. An assessment of socio-political determinants and international aid for government health expenditures. *Soc Sci Med* 2014; 114: 161-8. No eligible outcomes.
55. McMichael AJ. Globalization, climate change, and human health. *N Engl J Med* 2013; 368: 1335-43. Study design.
56. Mackenbach JP. Cultural values and population health: a quantitative analysis of variations in cultural values, health behaviours and health outcomes among 42 European countries. *Health Place* 2014; 28: 116-32. No eligible exposures.
57. Mackenbach JP, Karanikolos M, Lopez Bernal J, et al. Why did life expectancy in Central and Eastern Europe suddenly improve in the 1990s? An analysis by cause of death. *Scand J Public Health* 2015; 43: 796-801. No eligible exposures.
58. Marmot M, Allen J, Bell R, et al. WHO European review of social determinants of health and the health. *Lancet* 2012; 380: 1011-29. Study design.
59. Marten R, McIntyre D, Travassos C, et al. An assessment of progress towards universal health coverage in Brazil, Russia, India, China, and South Africa (BRICS). *Lancet* 2014; 384: 2164-71. Study design.
60. Minicuci N, León Díaz EM, Gómez León M, et al. Disability-free life expectancy: a cross-national comparison among Bulgarian, Italian and Latin American older population. *J Aging Health* 2011; 23: 629-81. No eligible political variables.
61. Moene KO, Wallerstein M. Earnings inequality and welfare spending – a disaggregated analysis. *World Polit* 2003; 55: 485–516. No eligible outcomes.
62. Molina-Mula J, de Pedro-Gómez JE. Impact of the politics of austerity in the quality of healthcare: ethical advice. *Nurs Philosoph* 2013; 14: 53-60. Study design.
63. Moller S, Misra J, Strader E. A cross-national look at how welfare states reduce inequality. *Sociol Compass* 2013; 7(2): 135-46. Study design.
64. Mukhopadhyay K, Chaudhuri S. Economic liberalisation, gender wage inequality and welfare. *J Internat Econ Dev* 2013; 22: 1214-39. No relevant outcomes.
65. Muntaner C. Democracy, authoritarianism, political conflict and population health: a global, comparative, and historical approach. *Soc Sci Med* 2013; 86: 107-12. Study design.
66. Muntaner C, Borrell C, Solà J, et al. Class relations and all-cause mortality: a test of Wright's social class scheme using the Barcelona 2000 Health Interview Survey. *Int J Health Serv* 2011; 41: 431-58. No relevant comparisons.
67. Muntaner C, Benach J, Chung H, et al. Welfare state, labour market inequalities and health. In a global context: an integrated framework. *SESPAS Report 2010. Gaceta Sanitaria* 2010; 24: 56-61. Study design.
68. Muntaner C, Chung H, Solar O, et al. A macro-level model of employment relations and health inequalities. *Int J Health Serv* 2010; 40(2): 215-21. Study design.
69. Nyquist F, Nygård M. Is the association between social capital and health robust across the Nordic regions? Evidence from a cross-sectional survey of older adults. *Int J Soc Welfare* 2013; 22(2): 119-29. No eligible exposures.
70. Or Z, Cases C, Lisac M, et al. Are health problems systemic? Politics of access and choice under Beveridge and Bismarck systems? *Health Econom Policy Law* 2010; 5: 269-93. Study design.
71. Raine KD. Obesity epidemics: inevitable outcome of globalization or preventable public health challenge? *Int J Public Health* 2012; 57: 35-6. Study design.
72. Razzak JA, Khan UR, Azam I, et al. Health disparities between Muslim and non-Muslim countries. *East Mediterr Health J* 2011; 18: 654-64. No eligible exposures.
73. Reeves A, McKee M, Basu S, et al. The political economy of austerity and healthcare: cross-national analysis of expenditure changes in 27 European nations, 1995-2011. No eligible outcomes.

- 1  
2  
3  
4  
5  
6  
7  
8  
9  
10  
11  
12  
13  
14  
15  
16  
17  
18  
19  
20  
21  
22  
23  
24  
25  
26  
27  
28  
29  
30  
31  
32  
33  
34  
35  
36  
37  
38  
39  
40  
41  
42  
43  
44  
45  
46  
47  
48  
49  
50  
51  
52  
53  
54  
55  
56  
57  
58  
59  
60
74. Simons AMW, Groffen DAI, Bosma H. Socio-economic inequalities in all-cause mortality in Europe: an exploration of the role of heightened social mobility. *Eur J Public Health* 2013; 23: 1010-2. No eligible exposures.
75. Vågerö D. The East-West health divide in Europe: growing and shifting eastwards. *J Soc Pol Studs* 2010; 8(3): 319-30. Study design.
76. Victora CG, Barros AJD, Axelson H, et al. How changes in coverage affect equity in maternal and child health interventions in 35 Countdown to 2015 countries: an analysis of national surveys. *Lancet* 2012; 380: 1149-56. No eligible exposures.
77. Wahrendorf M, Reinhardt JD, Siegrist J. Relationships of disability with age among adults aged 50 to 85: evidence from the United States, England and Continental Europe. *PLoS ONE* 2013; 8: e71893. No eligible exposures.
78. Wang Y, Lim H. The global childhood obesity epidemic and the association between socio-economic status and childhood obesity. *Int Rev Psychiatr* 2012; 24: 176-88. No eligible exposures.
79. Wilkinson RG, Pickett K. *The spirit level: why equality is better for everyone*. London: Penguin; 2010. Study design.
80. Wismar M, McQueen D, Lin V, et al. Rethinking the politics and implementation of health in all policies. *Israel J Health Policy Res* 2013; 2: 17. Study design.
81. Yamashita T, Kunkel SR. An international comparison of the association among literacy, education and health across the United States, Canada, Switzerland, Italy, Norway and Bermuda: implications for health disparities. *Asian J Soc Psychol* 2016; 18: 264-74. No eligible exposures.
82. Younsi M, Chakroun M. Does social capital determine health? Empirical evidence from MENA countries. *Soc Sci J* 2016; 53(3): 371-9. No eligible exposures.



# PRISMA 2009 Checklist

| Section/topic                      | #  | Checklist item                                                                                                                                                                                                                                                                                              | Reported on page #       |
|------------------------------------|----|-------------------------------------------------------------------------------------------------------------------------------------------------------------------------------------------------------------------------------------------------------------------------------------------------------------|--------------------------|
| <b>TITLE</b>                       |    |                                                                                                                                                                                                                                                                                                             |                          |
| Title                              | 1  | Identify the report as a systematic review, meta-analysis, or both.                                                                                                                                                                                                                                         | 1                        |
| <b>ABSTRACT</b>                    |    |                                                                                                                                                                                                                                                                                                             |                          |
| Structured summary                 | 2  | Provide a structured summary including, as applicable: background; objectives; data sources; study eligibility criteria, participants, and interventions; study appraisal and synthesis methods; results; limitations; conclusions and implications of key findings; systematic review registration number. | 2                        |
| <b>INTRODUCTION</b>                |    |                                                                                                                                                                                                                                                                                                             |                          |
| Rationale                          | 3  | Describe the rationale for the review in the context of what is already known.                                                                                                                                                                                                                              | 4-5                      |
| Objectives                         | 4  | Provide an explicit statement of questions being addressed with reference to participants, interventions, comparisons, outcomes, and study design (PICOS).                                                                                                                                                  | 5                        |
| <b>METHODS</b>                     |    |                                                                                                                                                                                                                                                                                                             |                          |
| Protocol and registration          | 5  | Indicate if a review protocol exists, if and where it can be accessed (e.g., Web address), and, if available, provide registration information including registration number.                                                                                                                               | NA                       |
| Eligibility criteria               | 6  | Specify study characteristics (e.g., PICOS, length of follow-up) and report characteristics (e.g., years considered, language, publication status) used as criteria for eligibility, giving rationale.                                                                                                      | 6                        |
| Information sources                | 7  | Describe all information sources (e.g., databases with dates of coverage, contact with study authors to identify additional studies) in the search and date last searched.                                                                                                                                  | 6                        |
| Search                             | 8  | Present full electronic search strategy for at least one database, including any limits used, such that it could be repeated.                                                                                                                                                                               | Table 1                  |
| Study selection                    | 9  | State the process for selecting studies (i.e., screening, eligibility, included in systematic review, and, if applicable, included in the meta-analysis).                                                                                                                                                   | 5-7                      |
| Data collection process            | 10 | Describe method of data extraction from reports (e.g., piloted forms, independently, in duplicate) and any processes for obtaining and confirming data from investigators.                                                                                                                                  | 7                        |
| Data items                         | 11 | List and define all variables for which data were sought (e.g., PICOS, funding sources) and any assumptions and simplifications made.                                                                                                                                                                       | 7                        |
| Risk of bias in individual studies | 12 | Describe methods used for assessing risk of bias of individual studies (including specification of whether this was done at the study or outcome level), and how this information is to be used in any data synthesis.                                                                                      | 7                        |
| Summary measures                   | 13 | State the principal summary measures (e.g., risk ratio, difference in means).                                                                                                                                                                                                                               | 7, but not meta-analysis |



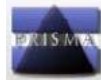

# PRISMA 2009 Checklist

|                      |    |                                                                                                                                                           |                         |
|----------------------|----|-----------------------------------------------------------------------------------------------------------------------------------------------------------|-------------------------|
| Synthesis of results | 14 | Describe the methods of handling data and combining results of studies, if done, including measures of consistency (e.g., $I^2$ ) for each meta-analysis. | 7, but no meta-analysis |
|----------------------|----|-----------------------------------------------------------------------------------------------------------------------------------------------------------|-------------------------|

Page 1 of 2

| Section/topic                 | #  | Checklist item                                                                                                                                                                                           | Reported on page #                  |
|-------------------------------|----|----------------------------------------------------------------------------------------------------------------------------------------------------------------------------------------------------------|-------------------------------------|
| Risk of bias across studies   | 15 | Specify any assessment of risk of bias that may affect the cumulative evidence (e.g., publication bias, selective reporting within studies).                                                             | NA, no meta-analysis                |
| Additional analyses           | 16 | Describe methods of additional analyses (e.g., sensitivity or subgroup analyses, meta-regression), if done, indicating which were pre-specified.                                                         | NA, no meta-analysis                |
| <b>RESULTS</b>                |    |                                                                                                                                                                                                          |                                     |
| Study selection               | 17 | Give numbers of studies screened, assessed for eligibility, and included in the review, with reasons for exclusions at each stage, ideally with a flow diagram.                                          | 7-8, Figure 2, Supplementary file 1 |
| Study characteristics         | 18 | For each study, present characteristics for which data were extracted (e.g., study size, PICOS, follow-up period) and provide the citations.                                                             | Tables 2-5                          |
| Risk of bias within studies   | 19 | Present data on risk of bias of each study and, if available, any outcome level assessment (see item 12).                                                                                                | 8, Supplementary file 3             |
| Results of individual studies | 20 | For all outcomes considered (benefits or harms), present, for each study: (a) simple summary data for each intervention group (b) effect estimates and confidence intervals, ideally with a forest plot. | Tables 2-5, no meta-analysis        |
| Synthesis of results          | 21 | Present results of each meta-analysis done, including confidence intervals and measures of consistency.                                                                                                  | NA, no meta-analysis                |
| Risk of bias across studies   | 22 | Present results of any assessment of risk of bias across studies (see Item 15).                                                                                                                          | NA, no meta-analysis                |
| Additional analysis           | 23 | Give results of additional analyses, if done (e.g., sensitivity or subgroup analyses, meta-regression [see Item 16]).                                                                                    | NA, no meta-analysis                |
| <b>DISCUSSION</b>             |    |                                                                                                                                                                                                          |                                     |
| Summary of evidence           | 24 | Summarize the main findings including the strength of evidence for each main outcome; consider their relevance to key groups (e.g., healthcare providers, users, and policy makers).                     | 10                                  |
| Limitations                   | 25 | Discuss limitations at study and outcome level (e.g., risk of bias), and at review-level (e.g., incomplete retrieval of identified research, reporting bias).                                            | 11-12                               |

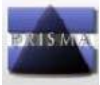

# PRISMA 2009 Checklist

|                |    |                                                                                                                                            |       |
|----------------|----|--------------------------------------------------------------------------------------------------------------------------------------------|-------|
| Conclusions    | 26 | Provide a general interpretation of the results in the context of other evidence, and implications for future research.                    | 13-15 |
| <b>FUNDING</b> |    |                                                                                                                                            |       |
| Funding        | 27 | Describe sources of funding for the systematic review and other support (e.g., supply of data); role of funders for the systematic review. | 15    |

From: Moher D, Liberati A, Tetzlaff J, Altman DG, The PRISMA Group (2009). Preferred Reporting Items for Systematic Reviews and Meta-Analyses: The PRISMA Statement. PLoS Med 6(7): e1000097. doi:10.1371/journal.pmed1000097

For more information, visit: [www.prisma-statement.org](http://www.prisma-statement.org).

Page 2 of 2

Supplementary file 6. Study-level risk of bias assessment

Green = high quality (low risk of bias); Amber = moderate quality (moderate risk of bias) or unknown; Red = low quality (high risk of bias)

| First author, year   | Selection bias                 | Selection bias    | Chance                | Detection bias   | Detection bias  | Detection/Reporting bias | Reporting bias       |  | Summary |
|----------------------|--------------------------------|-------------------|-----------------------|------------------|-----------------|--------------------------|----------------------|--|---------|
|                      | Participant representativeness | Group equivalence | Sample size rationale | Exposure measure | Outcome measure | Appropriate analysis     | Conflict of interest |  |         |
| Ades, 2013           | Green                          | Amber             | Green                 | Green            | Green           | Green                    | Green                |  | Green   |
| Adeyi, 1997          | Green                          | Amber             | Amber                 | Green            | Green           | Green                    | Green                |  | Green   |
| Akinci, 2014         | Green                          | Amber             | Amber                 | Green            | Green           | Green                    | Amber                |  | Amber   |
| Alvarez-Dardet, 2006 | Green                          | Amber             | Green                 | Green            | Green           | Green                    | Green                |  | Green   |
| Avendano, 2009       | Green                          | Amber             | Amber                 | Green            | Green           | Green                    | Amber                |  | Amber   |
| Bambra, 2014         | Green                          | Amber             | Green                 | Green            | Green           | Green                    | Green                |  | Green   |
| Bambra, 2009         | Green                          | Amber             | Amber                 | Green            | Green           | Green                    | Amber                |  | Amber   |
| Bambra, 2009         | Green                          | Amber             | Amber                 | Green            | Green           | Green                    | Green                |  | Green   |
| Bambra, 2006         | Green                          | Amber             | Amber                 | Green            | Green           | Green                    | Amber                |  | Amber   |
| Bambra, 2005         | Green                          | Amber             | Amber                 | Green            | Green           | Green                    | Amber                |  | Amber   |
| Batniji, 2014        | Green                          | Amber             | Green                 | Green            | Green           | Green                    | Green                |  | Green   |
| Baum, 2003           | Green                          | Amber             | Amber                 | Green            | Green           | Green                    | Amber                |  | Amber   |

| First author, year | Selection bias                 | Selection bias    | Chance                | Detection bias   | Detection bias  | Detection/Reporting bias | Reporting bias       |  | Summary |
|--------------------|--------------------------------|-------------------|-----------------------|------------------|-----------------|--------------------------|----------------------|--|---------|
|                    | Participant representativeness | Group equivalence | Sample size rationale | Exposure measure | Outcome measure | Appropriate analysis     | Conflict of interest |  |         |
| Bergh, 2010        |                                |                   |                       |                  |                 |                          |                      |  |         |
| Besley, 2006       |                                |                   |                       |                  |                 |                          |                      |  |         |
| Bosdriesz, 2015    |                                |                   |                       |                  |                 |                          |                      |  |         |
| Borrell, 2009      |                                |                   |                       |                  |                 |                          |                      |  |         |
| Bozorgmehr, 2014   |                                |                   |                       |                  |                 |                          |                      |  |         |
| Bradley, 2011      |                                |                   |                       |                  |                 |                          |                      |  |         |
| Brandt, 2014       |                                |                   |                       |                  |                 |                          |                      |  |         |
| Bremberg, 2016     |                                |                   |                       |                  |                 |                          |                      |  |         |
| Burroway, 2016     |                                |                   |                       |                  |                 |                          |                      |  |         |
| Burstrom, 2010     |                                |                   |                       |                  |                 |                          |                      |  |         |
| Cereseto, 1986     |                                |                   |                       |                  |                 |                          |                      |  |         |
| Chuang, 2013       |                                |                   |                       |                  |                 |                          |                      |  |         |
| Chuang, 2013       |                                |                   |                       |                  |                 |                          |                      |  |         |

1  
2  
3  
4  
5  
6  
7  
8  
9  
10  
11  
12  
13  
14  
15  
16  
17  
18  
19  
20  
21  
22  
23  
24  
25  
26  
27  
28  
29  
30  
31  
32  
33  
34  
35  
36  
37  
38  
39  
40  
41  
42  
43  
44  
45  
46

| First author, year | Selection bias                 | Selection bias    | Chance                | Detection bias   | Detection bias  | Detection/Reporting bias | Reporting bias       |  | Summary |
|--------------------|--------------------------------|-------------------|-----------------------|------------------|-----------------|--------------------------|----------------------|--|---------|
|                    | Participant representativeness | Group equivalence | Sample size rationale | Exposure measure | Outcome measure | Appropriate analysis     | Conflict of interest |  |         |
| Chung, 2006        | Green                          | Yellow            | Yellow                | Green            | Green           | Green                    | Yellow               |  | Yellow  |
| Conley, 2001       | Green                          | Yellow            | Yellow                | Green            | Green           | Green                    | Yellow               |  | Yellow  |
| Copeland, 2015     | Yellow                         | Yellow            | Yellow                | Green            | Green           | Green                    | Green                |  | Yellow  |
| Correa, 1992       | Green                          | Yellow            | Green                 | Green            | Green           | Green                    | Yellow               |  | Green   |
| Corsi, 2014        | Green                          | Yellow            | Green                 | Green            | Green           | Green                    | Green                |  | Green   |
| Costa-Font, 2016   | Green                          | Yellow            | Yellow                | Green            | Green           | Green                    | Green                |  | Green   |
| Craveiro, 2017     | Green                          | Yellow            | Yellow                | Green            | Green           | Green                    | Green                |  | Green   |
| Cross, 2009        | Yellow                         | Yellow            | Yellow                | Green            | Green           | Green                    | Green                |  | Yellow  |
| De Vogli, 2014     | Green                          | Yellow            | Yellow                | Green            | Green           | Green                    | Green                |  | Green   |
| Dahl, 2013         | Green                          | Yellow            | Yellow                | Green            | Green           | Green                    | Yellow               |  | Yellow  |
| Deeming, 2012      | Green                          | Yellow            | Yellow                | Green            | Green           | Green                    | Yellow               |  | Yellow  |
| Devaux, 2015       | Green                          | Yellow            | Yellow                | Green            | Green           | Green                    | Green                |  | Green   |
| Dietrich, 2015     | Green                          | Yellow            | Yellow                | Green            | Green           | Green                    | Yellow               |  | Yellow  |
| Doherty, 2010      | Green                          | Yellow            | Yellow                | Green            | Green           | Green                    | Green                |  | Green   |

| 1                   | 2  | 3  | 4  | 5  | 6  | 7  | 8  | 9  | 10 |
|---------------------|----|----|----|----|----|----|----|----|----|
| 11                  | 12 | 13 | 14 | 15 | 16 | 17 | 18 | 19 | 20 |
| 21                  | 22 | 23 | 24 | 25 | 26 | 27 | 28 | 29 | 30 |
| 31                  | 32 | 33 | 34 | 35 | 36 | 37 | 38 | 39 | 40 |
| 41                  | 42 | 43 | 44 | 45 | 46 | 47 | 48 | 49 | 50 |
| Dujardin, 2011      |    |    |    |    |    |    |    |    |    |
| Eikemo, 2008        |    |    |    |    |    |    |    |    |    |
| Eikemo, 2008        |    |    |    |    |    |    |    |    |    |
| Elgar, 2011         |    |    |    |    |    |    |    |    |    |
| Elola, 1995         |    |    |    |    |    |    |    |    |    |
| Engster, 2011       |    |    |    |    |    |    |    |    |    |
| Esmaeli, 2011       |    |    |    |    |    |    |    |    |    |
| Espelt, 2008        |    |    |    |    |    |    |    |    |    |
| Esser, 2010         |    |    |    |    |    |    |    |    |    |
| Estimé, 2014        |    |    |    |    |    |    |    |    |    |
| Fan, 2015           |    |    |    |    |    |    |    |    |    |
| Farfan-Portet, 2010 |    |    |    |    |    |    |    |    |    |
| Fayissa, 2001       |    |    |    |    |    |    |    |    |    |
| Foubert, 2014       |    |    |    |    |    |    |    |    |    |

1  
2  
3  
4  
5  
6  
7  
8  
9  
10  
11  
12  
13  
14  
15  
16  
17  
18  
19  
20  
21  
22  
23  
24  
25  
26  
27  
28  
29  
30  
31  
32  
33  
34  
35  
36  
37  
38  
39  
40  
41  
42  
43  
44  
45  
46

| First author, year | Selection bias                 | Selection bias    | Chance                | Detection bias   | Detection bias  | Detection/Reporting bias | Reporting bias       |  | Summary |
|--------------------|--------------------------------|-------------------|-----------------------|------------------|-----------------|--------------------------|----------------------|--|---------|
|                    | Participant representativeness | Group equivalence | Sample size rationale | Exposure measure | Outcome measure | Appropriate analysis     | Conflict of interest |  |         |
| Frey, 1999         |                                |                   |                       |                  |                 |                          |                      |  |         |
| Fritzell, 2012     |                                |                   |                       |                  |                 |                          |                      |  |         |
| Fritzell, 2013     |                                |                   |                       |                  |                 |                          |                      |  |         |
| Fumagalli, 2013    |                                |                   |                       |                  |                 |                          |                      |  |         |
| Gauri, 2002        |                                |                   |                       |                  |                 |                          |                      |  |         |
| Gerring, 2008      |                                |                   |                       |                  |                 |                          |                      |  |         |
| Gesthuizen, 2012   |                                |                   |                       |                  |                 |                          |                      |  |         |
| Ghobarah, 2004     |                                |                   |                       |                  |                 |                          |                      |  |         |
| Gilligan, 2015     |                                |                   |                       |                  |                 |                          |                      |  |         |
| Gizeles, 2009      |                                |                   |                       |                  |                 |                          |                      |  |         |
| Glass, 2016        |                                |                   |                       |                  |                 |                          |                      |  |         |
| Goryakin, 2015     |                                |                   |                       |                  |                 |                          |                      |  |         |
| Granados, 2010     |                                |                   |                       |                  |                 |                          |                      |  |         |

| First author, year     | Selection bias                 | Selection bias    | Chance                | Detection bias   | Detection bias  | Detection/Reporting bias | Reporting bias       |  | Summary |
|------------------------|--------------------------------|-------------------|-----------------------|------------------|-----------------|--------------------------|----------------------|--|---------|
|                        | Participant representativeness | Group equivalence | Sample size rationale | Exposure measure | Outcome measure | Appropriate analysis     | Conflict of interest |  |         |
| Guarnizo-Herreño, 2013 |                                |                   |                       |                  |                 |                          |                      |  |         |
| Harding, 2013          |                                |                   |                       |                  |                 |                          |                      |  |         |
| Hájek, 2012            |                                |                   |                       |                  |                 |                          |                      |  |         |
| Hauck, 2016            |                                |                   |                       |                  |                 |                          |                      |  |         |
| Heijink, 2013          |                                |                   |                       |                  |                 |                          |                      |  |         |
| Hoffman, 2011          |                                |                   |                       |                  |                 |                          |                      |  |         |
| Houweling, 2005        |                                |                   |                       |                  |                 |                          |                      |  |         |
| Huijts, 2010           |                                |                   |                       |                  |                 |                          |                      |  |         |
| Jolly, 2013            |                                |                   |                       |                  |                 |                          |                      |  |         |
| Jorgenson, 2009        |                                |                   |                       |                  |                 |                          |                      |  |         |
| Jorgenson, 2009        |                                |                   |                       |                  |                 |                          |                      |  |         |
| Karim, 2010            |                                |                   |                       |                  |                 |                          |                      |  |         |
| Kick, 1990             |                                |                   |                       |                  |                 |                          |                      |  |         |
| Klenk, 2016            |                                |                   |                       |                  |                 |                          |                      |  |         |
| Klomp, 2008            |                                |                   |                       |                  |                 |                          |                      |  |         |



1  
2  
3  
4  
5  
6  
7  
8  
9  
10  
11  
12  
13  
14  
15  
16  
17  
18  
19  
20  
21  
22  
23  
24  
25  
26  
27  
28  
29  
30  
31  
32  
33  
34  
35  
36  
37  
38  
39  
40  
41  
42  
43  
44  
45  
46

| First author, year     | Selection bias                 | Selection bias    | Chance                | Detection bias   | Detection bias  | Detection/Reporting bias | Reporting bias       |  | Summary |
|------------------------|--------------------------------|-------------------|-----------------------|------------------|-----------------|--------------------------|----------------------|--|---------|
|                        | Participant representativeness | Group equivalence | Sample size rationale | Exposure measure | Outcome measure | Appropriate analysis     | Conflict of interest |  |         |
| Krueger, 2015          | Green                          | Yellow            | Yellow                | Green            | Green           | Green                    | Yellow               |  | Yellow  |
| Kudamatsu, 2012        | Green                          | Yellow            | Green                 | Green            | Green           | Green                    | Green                |  | Green   |
| Kuovo, 2015            | Yellow                         | Yellow            | Yellow                | Green            | Green           | Green                    | Yellow               |  | Yellow  |
| Lahelma, 1994          | Yellow                         | Yellow            | Yellow                | Green            | Green           | Green                    | Green                |  | Yellow  |
| Lake, 2001             | Green                          | Yellow            | Yellow                | Green            | Green           | Green                    | Yellow               |  | Yellow  |
| Lena, 1993             | Green                          | Yellow            | Yellow                | Green            | Green           | Green                    | Yellow               |  | Yellow  |
| Levecque, 2011         | Green                          | Yellow            | Yellow                | Green            | Green           | Green                    | Yellow               |  | Yellow  |
| Levecque, 2015         | Green                          | Yellow            | Yellow                | Green            | Green           | Green                    | Yellow               |  | Yellow  |
| Levine, 2006           | Green                          | Yellow            | Yellow                | Green            | Green           | Green                    | Yellow               |  | Yellow  |
| Lin, 2012              | Green                          | Yellow            | Yellow                | Green            | Green           | Green                    | Green                |  | Green   |
| Lin, 2014              | Green                          | Yellow            | Yellow                | Green            | Green           | Green                    | Green                |  | Green   |
| London, 1990           | Green                          | Yellow            | Yellow                | Green            | Green           | Green                    | Yellow               |  | Yellow  |
| López-Casasnovas, 2014 | Green                          | Yellow            | Yellow                | Green            | Green           | Green                    | Green                |  | Green   |
| Lundberg, 2008         | Green                          | Yellow            | Yellow                | Green            | Green           | Green                    | Green                |  | Green   |

| First author, year    | Selection bias                 | Selection bias    | Chance                | Detection bias   | Detection bias  | Detection/Reporting bias | Reporting bias       |  | Summary |
|-----------------------|--------------------------------|-------------------|-----------------------|------------------|-----------------|--------------------------|----------------------|--|---------|
|                       | Participant representativeness | Group equivalence | Sample size rationale | Exposure measure | Outcome measure | Appropriate analysis     | Conflict of interest |  |         |
| Mackenbach, 2013      |                                |                   |                       |                  |                 |                          |                      |  |         |
| Mackenbach, 2013      |                                |                   |                       |                  |                 |                          |                      |  |         |
| Mackenbach, 2013      |                                |                   |                       |                  |                 |                          |                      |  |         |
| Martens, 2010         |                                |                   |                       |                  |                 |                          |                      |  |         |
| Maynard, 2015         |                                |                   |                       |                  |                 |                          |                      |  |         |
| Maynard, 2016         |                                |                   |                       |                  |                 |                          |                      |  |         |
| Miething, 2013        |                                |                   |                       |                  |                 |                          |                      |  |         |
| Menon-Johansson, 2005 |                                |                   |                       |                  |                 |                          |                      |  |         |
| Milner, 2011          |                                |                   |                       |                  |                 |                          |                      |  |         |
| Minagawa, 2013        |                                |                   |                       |                  |                 |                          |                      |  |         |
| Moon, 1985            |                                |                   |                       |                  |                 |                          |                      |  |         |
| Moor, 2013            |                                |                   |                       |                  |                 |                          |                      |  |         |
| Moore, 2006           |                                |                   |                       |                  |                 |                          |                      |  |         |

1  
2  
3  
4  
5  
6  
7  
8  
9  
10  
11  
12  
13  
14  
15  
16  
17  
18  
19  
20  
21  
22  
23  
24  
25  
26  
27  
28  
29  
30  
31  
32  
33  
34  
35  
36  
37  
38  
39  
40  
41  
42  
43  
44  
45  
46

| First author, year | Selection bias                 | Selection bias    | Chance                | Detection bias   | Detection bias  | Detection/Reporting bias | Reporting bias       |  | Summary |
|--------------------|--------------------------------|-------------------|-----------------------|------------------|-----------------|--------------------------|----------------------|--|---------|
|                    | Participant representativeness | Group equivalence | Sample size rationale | Exposure measure | Outcome measure | Appropriate analysis     | Conflict of interest |  |         |
| Muldoon, 2011      | Green                          | Yellow            | Yellow                | Green            | Green           | Green                    | Green                |  | Green   |
| Muntaner, 2017     | Green                          | Yellow            | Green                 | Green            | Green           | Green                    | Green                |  | Green   |
| Muntaner, 2002     | Green                          | Yellow            | Yellow                | Green            | Green           | Green                    | Yellow               |  | Yellow  |
| Navarro, 2006      | Green                          | Yellow            | Yellow                | Green            | Green           | Green                    | Green                |  | Green   |
| Navarro, 2003      | Green                          | Yellow            | Yellow                | Green            | Green           | Green                    | Yellow               |  | Yellow  |
| Navarro, 2001      | Green                          | Yellow            | Yellow                | Green            | Green           | Green                    | Yellow               |  | Yellow  |
| Navia, 2003        | Green                          | Yellow            | Yellow                | Green            | Green           | Green                    | Yellow               |  | Yellow  |
| Nelson, 2014       | Green                          | Yellow            | Yellow                | Green            | Green           | Green                    | Green                |  | Green   |
| Norden mark, 2006  | Yellow                         | Yellow            | Yellow                | Green            | Green           | Green                    | Yellow               |  | Yellow  |
| Novignon, 2012     | Green                          | Yellow            | Green                 | Green            | Green           | Green                    | Green                |  | Green   |
| Oberlander, 2017   | Green                          | Yellow            | Yellow                | Green            | Green           | Green                    | Yellow               |  | Yellow  |
| Olafsdottir, 2007  | Yellow                         | Yellow            | Yellow                | Green            | Green           | Green                    | Yellow               |  | Yellow  |
| Olsen, 2007        | Green                          | Yellow            | Yellow                | Green            | Green           | Green                    | Green                |  | Green   |
| Oster, 2012        | Green                          | Yellow            | Green                 | Green            | Green           | Green                    | Yellow               |  | Green   |

| First author, year  | Selection bias                 | Selection bias    | Chance                | Detection bias   | Detection bias  | Detection/Reporting bias | Reporting bias       |  | Summary |
|---------------------|--------------------------------|-------------------|-----------------------|------------------|-----------------|--------------------------|----------------------|--|---------|
|                     | Participant representativeness | Group equivalence | Sample size rationale | Exposure measure | Outcome measure | Appropriate analysis     | Conflict of interest |  |         |
| Owen, 2007          |                                |                   |                       |                  |                 |                          |                      |  |         |
| Palència, 2013      |                                |                   |                       |                  |                 |                          |                      |  |         |
| Pickett, 2007       |                                |                   |                       |                  |                 |                          |                      |  |         |
| Pillai, 2006        |                                |                   |                       |                  |                 |                          |                      |  |         |
| Pinzón-Flórez, 2015 |                                |                   |                       |                  |                 |                          |                      |  |         |
| Platts, 2015        |                                |                   |                       |                  |                 |                          |                      |  |         |
| Ploubidis, 2012     |                                |                   |                       |                  |                 |                          |                      |  |         |
| Popham, 2013        |                                |                   |                       |                  |                 |                          |                      |  |         |
| Raphael, 2004       |                                |                   |                       |                  |                 |                          |                      |  |         |
| Reeves, 2014        |                                |                   |                       |                  |                 |                          |                      |  |         |
| Richter, 2012       |                                |                   |                       |                  |                 |                          |                      |  |         |
| Ross, 2006          |                                |                   |                       |                  |                 |                          |                      |  |         |
| Rostila, 2007       |                                |                   |                       |                  |                 |                          |                      |  |         |
| Rovny, 2011         |                                |                   |                       |                  |                 |                          |                      |  |         |

1  
2  
3  
4  
5  
6  
7  
8  
9  
10  
11  
12  
13  
14  
15  
16  
17  
18  
19  
20  
21  
22  
23  
24  
25  
26  
27  
28  
29  
30  
31  
32  
33  
34  
35  
36  
37  
38  
39  
40  
41  
42  
43  
44  
45  
46

| First author, year   | Selection bias                 | Selection bias    | Chance                | Detection bias   | Detection bias  | Detection/Reporting bias | Reporting bias       |  | Summary |
|----------------------|--------------------------------|-------------------|-----------------------|------------------|-----------------|--------------------------|----------------------|--|---------|
|                      | Participant representativeness | Group equivalence | Sample size rationale | Exposure measure | Outcome measure | Appropriate analysis     | Conflict of interest |  |         |
| Sacker, 2011         |                                |                   |                       |                  |                 |                          |                      |  |         |
| Safaei, 2006         |                                |                   |                       |                  |                 |                          |                      |  |         |
| Sanders, 2009        |                                |                   |                       |                  |                 |                          |                      |  |         |
| Sarti, 2013          |                                |                   |                       |                  |                 |                          |                      |  |         |
| Sekine, 2009         |                                |                   |                       |                  |                 |                          |                      |  |         |
| Shandra, 2010        |                                |                   |                       |                  |                 |                          |                      |  |         |
| Shandra, 2004        |                                |                   |                       |                  |                 |                          |                      |  |         |
| Shen, 2001           |                                |                   |                       |                  |                 |                          |                      |  |         |
| Shen, 1997           |                                |                   |                       |                  |                 |                          |                      |  |         |
| Shim, 2015           |                                |                   |                       |                  |                 |                          |                      |  |         |
| Stavrova, 2011       |                                |                   |                       |                  |                 |                          |                      |  |         |
| Stroup, 2007         |                                |                   |                       |                  |                 |                          |                      |  |         |
| Stuckler, 2010       |                                |                   |                       |                  |                 |                          |                      |  |         |
| Tsai, 2006           |                                |                   |                       |                  |                 |                          |                      |  |         |
| Van der Heuvel, 2013 |                                |                   |                       |                  |                 |                          |                      |  |         |

| First author, year  | Selection bias                 | Selection bias    | Chance                | Detection bias   | Detection bias  | Detection/Reporting bias | Reporting bias       |  | Summary |
|---------------------|--------------------------------|-------------------|-----------------------|------------------|-----------------|--------------------------|----------------------|--|---------|
|                     | Participant representativeness | Group equivalence | Sample size rationale | Exposure measure | Outcome measure | Appropriate analysis     | Conflict of interest |  |         |
| Van Tuyckom, 2011   | Green                          | Amber             | Green                 | Green            | Green           | Green                    | Green                |  | Green   |
| Vahid Shahidi, 2016 | Green                          | Amber             | Amber                 | Green            | Green           | Green                    | Green                |  | Green   |
| Veenhoven, 2000     | Green                          | Amber             | Amber                 | Green            | Green           | Green                    | Amber                |  | Amber   |
| Veenhoven, 1995     | Green                          | Amber             | Amber                 | Green            | Green           | Green                    | Amber                |  | Amber   |
| Vöörmann, 2013      | Amber                          | Amber             | Amber                 | Green            | Green           | Green                    | Amber                |  | Amber   |
| Wejnert, 2008       | Green                          | Amber             | Amber                 | Green            | Green           | Green                    | Amber                |  | Amber   |
| Whitehead, 2000     | Amber                          | Amber             | Amber                 | Green            | Green           | Green                    | Green                |  | Amber   |
| Witvliet, 2013      | Green                          | Amber             | Amber                 | Green            | Green           | Green                    | Green                |  | Green   |
| Wu, 2007            | Green                          | Amber             | Amber                 | Green            | Green           | Green                    | Amber                |  | Amber   |
| York, 2014          | Green                          | Amber             | Green                 | Green            | Green           | Green                    | Amber                |  | Green   |
| Zambon, 2006        | Green                          | Amber             | Amber                 | Green            | Green           | Green                    | Amber                |  | Amber   |
| Zweifel, 2000       | Green                          | Amber             | Amber                 | Green            | Green           | Green                    | Amber                |  | Amber   |

Green = high quality (low risk of bias); Amber = moderate quality (moderate risk of bias) or unknown; Red = low quality (high risk of bias)

Supplementary file 7. Table of study-level characteristics and results for welfare state

| Serial number                       | Authors, publication year | Years of study | Level of analysis | Assessment of economic factors | Setting                                    | Political exposures  | Population health outcomes                           | Result category |
|-------------------------------------|---------------------------|----------------|-------------------|--------------------------------|--------------------------------------------|----------------------|------------------------------------------------------|-----------------|
| <b>Studies from the 2010 review</b> |                           |                |                   |                                |                                            |                      |                                                      |                 |
| 1                                   | Avendano et al, 2009      | 2004-2007      | Ecological        | Yes                            | 11 countries from 3 European regions       | Welfare regimes      | Chronic conditions, self-reported health, depression | Positive        |
| 2                                   | Bambra, 2005              | 1997-1999      | Ecological        | No                             | 18 OECD countries                          | Welfare regimes      | Health care index                                    | Positive        |
| 3                                   | Bambra, 2006              | 1980-1998      | Ecological        | No                             | 18 OECD countries                          | Welfare regimes      | Infant mortality                                     | Positive        |
| 4                                   | Bambra and Eikemo, 2009   | 2002-2004      | Individual        | No                             | 37,499 persons from 21 European countries  | Welfare regimes      | Self-reported health, long-standing illness          | Positive        |
| 5                                   | Bambra et al, 2009        | 1998-2004      | Individual        | No                             | 118,245 persons from 13 European countries | Welfare regimes      | Self-rated health                                    | Inconclusive    |
| 6                                   | Burstrom et al, 2010      | 1999-2001      | Individual        | Yes                            | 28,485 persons from                        | Family policy models | Self-rated health, limiting long-                    | Positive        |

|    |                           |           |            |     |                                            |                                         |                                                                      |              |
|----|---------------------------|-----------|------------|-----|--------------------------------------------|-----------------------------------------|----------------------------------------------------------------------|--------------|
|    |                           |           |            |     | Italy, Sweden and Britain                  |                                         | standing illness                                                     |              |
| 7  | Chung and Muntaner, 2006  | 1960-1994 | Ecological | Yes | 19 wealthy OECD countries                  | Public sector medical care              | Infant mortality rate, low birth weight, under-five mortality weight | Positive     |
| 8  | Chung and Muntaner, 2007  | 1960-1998 | Ecological | Yes | 18 wealthy countries                       | Welfare regimes                         | Infant mortality rate, low birth weight                              | Positive     |
| 9  | Conley and Springer, 2001 | 1960-1992 | Ecological | Yes | 19 OECD countries                          | Welfare regimes, welfare state spending | Infant mortality                                                     | Positive     |
| 10 | Dahl et al, 2006          | 1970-2005 | Ecological | Yes | Up to 11 European countries                | Welfare regimes                         | Absolute and relative health inequalities                            | Inconclusive |
| 11 | Eikemo et al, 2008        | 2002-2004 | Individual | No  | 69, 821 persons from 23 European countries | Welfare regimes                         | Self-reported health, limiting longstanding illness                  | Inconclusive |
| 12 | Eikemo et al, 2008        | 2002-2004 | Individual | No  | 65, 065 persons from 21 European countries | Welfare regimes                         | Subjective poor health, limiting longstanding illness                | Positive     |
| 13 | Elola et al, 1995         | 1990-1991 | Ecological | Yes | 17 Western European countries              | Health care system                      | Infant mortality, life expectancy                                    | Positive     |



|    |                           |           |            |     |                                                             |                           |                                                                |              |
|----|---------------------------|-----------|------------|-----|-------------------------------------------------------------|---------------------------|----------------------------------------------------------------|--------------|
| 14 | Farfan-Portet et al, 2010 | 2001      | Individual | No  | 5,729,859 persons in Belgium and Britain                    | Welfare regimes           | Self-reported health                                           | Inconclusive |
| 15 | Fayissa, 2001             | 1993      | Ecological | Yes | 34 sub-Saharan African countries                            | Public health expenditure | Infant mortality, child mortality                              | Positive     |
| 16 | Grosse et al, 2010        | 2004      | Individual | No  | 38,122 persons from 24 European countries                   | Welfare regimes           | Perception of need for seeking primary health care             | Positive     |
| 17 | Karim, 2010               | 2003      | Ecological | Yes | 30 countries in Europe, North America, Australia and Asia   | Welfare regimes           | Infant mortality, life expectancy                              | Positive     |
| 18 | Klomp and de Haan, 2008   | 2000-2005 | Ecological | Yes | 101 low, middle and high income countries                   | Governance                | 19 mortality, disease, sickness indicators                     | Positive     |
| 19 | Lahelma and Arber, 1994   | 1985-1987 | Individual | No  | Ca. 30,000 persons from Britain, Finland, Norway and Sweden | Welfare regimes           | Limiting long-standing illness                                 | Negative     |
| 20 | Lundberg et al, 2008      | 1950-2000 | Ecological | Yes | 18 OECD countries                                           | Family policy models      | Infant mortality, mortality among those aged 30-59 and over 65 | Positive     |

|    |                          |           |            |     |                                                                 |                           |                                                                                              |              |
|----|--------------------------|-----------|------------|-----|-----------------------------------------------------------------|---------------------------|----------------------------------------------------------------------------------------------|--------------|
| 21 | Menon-Johansson, 2005    | 2002      | Ecological | Yes | 149 countries                                                   | Governance                | HIV prevalence                                                                               | Positive     |
| 22 | Muntaner et al, 2006     | 1980-1995 | Individual | Yes | Sweden, Italy, and England and Wales (combined)                 | Welfare regimes           | Mortality level per occupational class, population attributable risk, index of dissimilarity | Inconclusive |
| 23 | Nordenmark et al, 2006   | 1992-2001 | Individual | Yes | 3442 persons from Sweden, Ireland and Great Britain             | Unemployment benefit type | Psychological distress                                                                       | Positive     |
| 24 | Ouweneel, 2002           | 1980-1990 | Ecological | Yes | 42 'first-world, second-world and third-world' countries        | Social security system    | Self-rated health                                                                            | Inconclusive |
| 25 | Raphael and Bryant, 2004 | 1999      | Ecological | Yes | 5 countries (Canada, Denmark, Sweden, UK, US)                   | Welfare state spending    | Life expectancy                                                                              | Positive     |
| 26 | Rostila, 2007            | 2002-2003 | Individual | Yes | 36,489 persons in 20 European countries                         | Welfare regimes           | Self-rated health, life expectancy                                                           | Positive     |
| 27 | Sanders et al, 2009      | 1998-2002 | Individual | Yes | 12,888 persons in 4 countries (UK, Finland, Germany, Australia) | Welfare regimes           | Oral health                                                                                  | Positive     |

1  
2  
3  
4  
5  
6  
7  
8  
9  
10  
11  
12  
13  
14  
15  
16  
17  
18  
19  
20  
21  
22  
23  
24  
25  
26  
27  
28  
29  
30  
31  
32  
33  
34  
35  
36  
37  
38  
39  
40  
41  
42  
43  
44  
45  
46  
47

|                                |                              |           |            |     |                                                                |                           |                                                                          |              |
|--------------------------------|------------------------------|-----------|------------|-----|----------------------------------------------------------------|---------------------------|--------------------------------------------------------------------------|--------------|
| 28                             | Sekine et al, 2009           | 1991-2003 | Individual | No  | 17,801 persons in Britain, Finland and Japan                   | Welfare regimes           | The Short-Form 36: physical and mental health functioning                | Positive     |
| 29                             | Veenhoven and Ouweneel, 1995 | 1965-1985 | Ecological | Yes | Up to 97 rich and poor countries                               | Welfare state expenditure | Life expectancy                                                          | Positive     |
| 30                             | Veenhoven, 2000              | 1980-1990 | Ecological | Yes | 40 countries                                                   | Welfare state expenditure | Life expectancy, self-rated health                                       | Inconclusive |
| 31                             | Whitehead et al, 2000        | 1979-1996 | Individual | No  | 80,792 persons from Britain and Sweden                         | Social benefit system     | Self-perceived health, limiting longstanding illness                     | Inconclusive |
| 32                             | Zambon et al, 2006           | 2001-2002 | Individual | Yes | 160, 325 persons from 32 European and North American countries | Welfare regimes           | Self-reported health, well-being, health symptom load, health behaviours | Positive     |
| <b>Studies from our update</b> |                              |           |            |     |                                                                |                           |                                                                          |              |
| 33                             | Ades et al, 2013             | 2008-2012 | Ecological | Yes | 27 European Union countries                                    | Healthcare spending       | Cancer incidence and mortality                                           | Positive     |
| 34                             | Akinci et al, 2014           | 1990-2010 | Ecological | Yes | 19 Middle Eastern and North African countries                  | Healthcare spending       | Infant, under-5, and maternal mortality                                  | Positive     |

|    |                       |            |            |     |                                                    |                                                                                                  |                                                                                  |              |
|----|-----------------------|------------|------------|-----|----------------------------------------------------|--------------------------------------------------------------------------------------------------|----------------------------------------------------------------------------------|--------------|
| 35 | Bambra et al, 2014    | 2010       | Individual | Yes | 21,705 men and women from 27 European countries    | Welfare regime                                                                                   | Self-rated health                                                                | Inconclusive |
| 36 | Batniji et al, 2014   | 1980-2011  | Ecological | Yes | 22 Arab countries                                  | Governance                                                                                       | Mortality                                                                        | Positive     |
| 37 | Bentley et al, 2016   | 2001-2008  | Ecological | Yes | Australia and UK                                   | Housing benefit generosity                                                                       | Mental health                                                                    | Positive     |
| 38 | Bradley et al, 2011   | 2009       | Ecological | Yes | 30 OECD countries                                  | Healthcare spending, social care spending                                                        | Life expectancy, low birth weight, maternal mortality, potential life years lost | Positive     |
| 39 | Brandt and Hank, 2014 | Up to 2009 | Individual | No  | More than 13,000 people from 11 European countries | Welfare regimes                                                                                  | Self-rated health, job loss                                                      | Positive     |
| 40 | Bremberg, 2016        | 1990-2012  | Ecological | Yes | 28 OECD countries                                  | Family benefit spending, healthcare spending, government expenditure on research and development | Infant mortality                                                                 | Inconclusive |
| 41 | Copeland et al, 2015  | 1991-2010  | Individual | Yes | England (n = 217,514) and Sweden (n = 184, 428)    | Welfare regimes                                                                                  | Self-rated health, health inequalities                                           | Positive     |

1  
2  
3  
4  
5  
6  
7  
8  
9  
10  
11  
12  
13  
14  
15  
16  
17  
18  
19  
20  
21  
22  
23  
24  
25  
26  
27  
28  
29  
30  
31  
32  
33  
34  
35  
36  
37  
38  
39  
40  
41  
42  
43  
44  
45  
46  
47

|    |                             |           |            |     |                                                       |                                                             |                                                                                                  |          |
|----|-----------------------------|-----------|------------|-----|-------------------------------------------------------|-------------------------------------------------------------|--------------------------------------------------------------------------------------------------|----------|
| 42 | Corsi and Subramanian, 2014 | 1990-2012 | Ecological | Yes | 35 sub-Saharan African countries                      | Maternal and child health service coverage                  | Under-5 mortality                                                                                | Positive |
| 43 | Craveiro, 2017              | 2010-2011 | Individual | Yes | 53,615 individuals from 15 European countries         | Welfare regimes                                             | Composite health measure derived from 3 indicators based on factor analysis, health inequalities | Positive |
| 44 | Dahl and van der Wel, 2013  | 2005      | Individual | Yes | Around 245,000 individuals from 18 European countries | National social expenditure                                 | Self-rated health, health inequalities                                                           | Positive |
| 45 | Deeming and Hayes, 2012     | 2000-2005 | Individual | Yes | Just under 30,000 individuals from OECD countries     | Welfare regimes                                             | Unhappiness                                                                                      | Positive |
| 46 | Devaux, 2015                | 2006-2009 | Individual | Yes | Participants from 18 OECD countries                   | Health care system                                          | Health inequalities                                                                              | Positive |
| 47 | Dragano et al, 2010         | 2004-2006 | Individual | Yes | 9917 older individuals from 12 European countries     | Welfare regimes, indicators from the EU Labour Force Survey | Depression (EURO-D and CES-D)                                                                    | Positive |

|    |                            |           |            |     |                                                       |                                                                                                     |                             |              |
|----|----------------------------|-----------|------------|-----|-------------------------------------------------------|-----------------------------------------------------------------------------------------------------|-----------------------------|--------------|
| 48 | Dujardin et al, 2011       | 2001      | Individual | Yes | 5729858 individuals from Belgium and Great Britain    | Home care policy system                                                                             | Health burden of care       | Positive     |
| 49 | Elgar et al, 2011          | 2006      | Individual | Yes | 48641 adults from 33 rich and middle-income countries | Healthcare spending                                                                                 | Homicide                    | Inconclusive |
| 50 | Engster and Stensöta, 2011 | 1995-2005 | Individual | Yes | Participants from 20 OECD countries                   | Family policy regime: family cash and tax benefits, paid parenting leave, public child care support | Child poverty and mortality | Positive     |
| 51 | Esmaeli et al, 2011        | 1996-2004 | Ecological | Yes | 24 Islamic countries                                  | Healthcare spending                                                                                 | Life expectancy             | Inconclusive |
| 52 | Esser and Palme, 2010      | 2002-2005 | Individual | Yes | 13 OECD countries                                     | Pension system                                                                                      | Self-rated health, WHO-5    | Positive     |
| 53 | Foubert et al, 2014        | 2002-2004 | Individual | Yes | 213764 individuals from 57 countries                  | Welfare regimes                                                                                     | Self-rated health           | Positive     |
| 54 | Fritzell et al, 2012       | 2000-2005 | Individual | No  | Randomly sampled British, Italian and Swedish mothers | Family policy model                                                                                 | Maternal health             | Negative     |
| 55 | Fritzell et al, 2013       | 1980-2005 | Ecological | Yes | Up to 25 countries per wave                           | Welfare regimes                                                                                     | Mortality                   | Positive     |

|    |                              |           |            |     |                                                    |                                               |                                                 |              |
|----|------------------------------|-----------|------------|-----|----------------------------------------------------|-----------------------------------------------|-------------------------------------------------|--------------|
| 56 | Gesthuizen et al, 2012       | 2002-2008 | Individual | Yes | Over 90,000 individuals from 32 European countries | Healthcare spending, modernised labour market | Self-rated health                               | Positive     |
| 57 | Gilligan and Skrepnek, 2015  | 1995-2010 | Ecological | Yes | 21 Eastern Mediterranean countries                 | Healthcare spending                           | Life expectancy                                 | Positive     |
| 58 | Glass et al, 2016            | 2006-2008 | Individual | Yes | 22 OECD countries                                  | Family policy                                 | Happiness                                       | Positive     |
| 59 | Granados, 2010               | 1950-2000 | Ecological | Yes | 8 European countries                               | Welfare regimes                               | Life expectancy, mortality, tobacco consumption | Inconclusive |
| 60 | Guarnizo-Herreño et al, 2013 | 2009      | Ecological | No  | 31 European countries                              | Welfare regimes                               | Oral health                                     | Positive     |
| 61 | Harding et al, 2013          | 1971-2006 | Ecological | No  | England and Wales, Italy and Finland               | Welfare regimes                               | Elder mortality                                 | Negative     |
| 62 | Hájek et al, 2012            | 1995-2008 | Ecological | Yes | 27 European Union countries                        | Healthcare spending                           | Life expectancy, standardised death rate        | Positive     |
| 63 | Hauck et al, 2016            | 1990-2012 | Ecological | Yes | 54 low-income studies                              | Healthcare spending                           | Life expectancy                                 | Inconclusive |
| 64 | Heijink et al, 2013          | 1996-2006 | Ecological | Yes | 14 Western countries                               | Healthcare spending                           | Avoidable mortality                             | Positive     |
| 65 | Hoffman, 2011                | 1980-2006 | Ecological | Yes | USA and Denmark                                    | Welfare system                                | Old-age mortality                               | Negative     |
| 66 | Kuovo and Räsänen, 2015      | 2010      | Individual | No  | 10,046 individuals from Finland, Britain,          | Welfare system                                | Subjective well-being                           | Positive     |

|    |                                       |           |            |     |                                                       |                                                   |                                           |              |
|----|---------------------------------------|-----------|------------|-----|-------------------------------------------------------|---------------------------------------------------|-------------------------------------------|--------------|
|    |                                       |           |            |     | Germany and Greece                                    |                                                   |                                           |              |
| 67 | Levecque et al, 2011                  | 2006-2007 | Individual | Yes | 41686 people from 23 European countries               | Welfare regimes, welfare state generosity         | Depression (CES-D)                        | Positive     |
| 68 | Levecque et al, 2015                  | 2006-2007 | Individual | No  | 37076 people from 20 European countries               | Migrant integration social policy                 | Depression (CES-D)                        | Inconclusive |
| 69 | Lin et al, 2014                       | 1996-2010 | Ecological | Yes | 149 countries                                         | Governance                                        | Child mortality                           | Positive     |
| 70 | López-Casasnovas and Soley-Bori, 2014 | 1980-2010 | Ecological | Yes | 32 OECD countries                                     | Healthcare and social spending, healthcare system | Health Human Development Index            | Positive     |
| 71 | McKinnon et al, 2016                  | 2006-2012 | Individual | Yes | Participants from 48 low- and middle-income countries | Maternal health service coverage                  | Neonatal mortality, health inequality     | Positive     |
| 72 | Maynard, 2016                         | 1985-2005 | Ecological | Yes | 74 developing countries                               | Healthcare spending                               | Tuberculosis mortality                    | Positive     |
| 73 | Miething et al, 2013                  | 2000      | Individual | Yes | 19353 individuals from Sweden, East and West Germany  | Welfare regimes                                   | Self-rated health                         | Inconclusive |
| 74 | Minagawa, 2013                        | 1990-2009 | Ecological | Yes | 23 Eastern European countries                         | Healthcare spending                               | Age-specific mortality, self-rated health | Positive     |



1  
2  
3  
4  
5  
6  
7  
8  
9  
10  
11  
12  
13  
14  
15  
16  
17  
18  
19  
20  
21  
22  
23  
24  
25  
26  
27  
28  
29  
30  
31  
32  
33  
34  
35  
36  
37  
38  
39  
40  
41  
42  
43  
44  
45  
46  
47

|    |                           |           |                            |     |                                               |                                                              |                                                              |          |
|----|---------------------------|-----------|----------------------------|-----|-----------------------------------------------|--------------------------------------------------------------|--------------------------------------------------------------|----------|
| 75 | Moor et al, 2013          | 1981-1999 | Ecological                 | Yes | 47 European countries and regions             | Welfare state generosity (Social Policy Indicators Database) | Life satisfaction                                            | Positive |
| 76 | Muldoon et al, 2011       | 2001-2008 | Ecological                 | No  | 136 United Nations countries                  | Healthcare spending                                          | Infant, child and maternal mortality                         | Positive |
| 77 | Muntaner et al, 2017      | 2003-2010 | Household-level ecological | Yes | 27 European Union countries                   | Welfare regimes                                              | Self-rated health, chronic conditions                        | Positive |
| 78 | Nelson and Fritzell, 2014 | 1990-2009 | Ecological                 | Yes | 18 countries                                  | Minimum income benefits                                      | Mortality (life expectancy and age-standardised death rates) | Positive |
| 79 | Novignon et al, 2012      | 1995-2010 | Ecological                 | Yes | 44 Sub-Saharan African countries              | Healthcare spending                                          | Life expectancy, death rate, infant mortality                | Positive |
| 80 | Olafsdottir, 2007         | 1998      | Individual                 | Yes | Participants from USA and Iceland             | Welfare regimes, healthcare spending                         | Self-rated physical health, health inequality                | Positive |
| 81 | Olsen and Dahl, 2007      | 2003      | Individual                 | Yes | 38,472 individuals from 21 European countries | Healthcare spending                                          | Self-rated health                                            | Positive |
| 82 | Palència et al, 2014      | 2010      | Individual                 | Yes | 23782 men and 28655 women from                | Gender equality policies                                     | Health inequality                                            | Positive |

|    |                             |           |            |     |                                         |                                                           |                                      |              |
|----|-----------------------------|-----------|------------|-----|-----------------------------------------|-----------------------------------------------------------|--------------------------------------|--------------|
|    |                             |           |            |     | 26 European countries                   |                                                           |                                      |              |
| 83 | Pickett and Wilkinson, 2007 | 1998-2006 | Ecological | Yes | 23 rich countries                       | Income equality                                           | Child wellbeing                      | Positive     |
| 84 | Pinzón-Flórez et al, 2015   | 2000-2010 | Ecological | Yes | 154 countries                           | Healthcare spending                                       | Child and maternal mortality         | Positive     |
| 85 | Platts, 2015                | 2000-2007 | Ecological | Yes | UK and Russia                           | Welfare regimes                                           | Self-rated health                    | Inconclusive |
| 86 | Ploubidis et al, 2012       | 2006-2007 | Individual | Yes | 33528 people from 14 European countries | Welfare regimes, income equality                          | Health in later life                 | Positive     |
| 87 | Popham et al, 2013          | 2006      | Ecological | No  | 37 countries                            | Welfare regimes                                           | Life expectancy                      | Positive     |
| 88 | Reeves et al, 2014          | 1995-2012 | Ecological | Yes | 21 European countries                   | Healthcare spending, social spending, pension expenditure | Tuberculosis control                 | Positive     |
| 89 | Richter et al, 2012         | 2006      | Individual | Yes | 141091 adolescents from 32 countries    | Welfare regimes                                           | Subjective health, health inequality | Positive     |
| 90 | Rovny, 2011                 | 1990-1999 | Ecological | Yes | 17 OECD countries                       | Family social policy                                      | Fertility                            | Positive     |
| 91 | Sacker et al, 2011          | 1995-2001 | Ecological | Yes | Britain, Germany, Denmark and USA       | Welfare regimes                                           | Self-rated health                    | Positive     |
| 92 | Sarti et al, 2013           | 2005      | Individual | Yes | Participants from                       | Welfare regimes                                           | Self-rated health, health inequality | Positive     |

1  
2  
3  
4  
5  
6  
7  
8  
9  
10  
11  
12  
13  
14  
15  
16  
17  
18  
19  
20  
21  
22  
23  
24  
25  
26  
27  
28  
29  
30  
31  
32  
33  
34  
35  
36  
37  
38  
39  
40  
41  
42  
43  
44  
45  
46  
47

|    |                            |            |            |     |                                                |                                                                                                       |                                                       |              |
|----|----------------------------|------------|------------|-----|------------------------------------------------|-------------------------------------------------------------------------------------------------------|-------------------------------------------------------|--------------|
|    |                            |            |            |     | European countries                             |                                                                                                       |                                                       |              |
| 93 | Shim, 2015                 | 1980-2010  | Ecological | Yes | 19 OECD countries                              | Social welfare expenditure                                                                            | Infant mortality                                      | Inconclusive |
| 94 | Stavrova et al, 2011       | 1999-2009  | Individual | Yes | Participants from 28 OECD countries            | Unemployment benefit policies                                                                         | Wellbeing among the unemployed                        | Inconclusive |
| 95 | Stuckler et al, 2010       | 1980-2005  | Ecological | Yes | Up to 18 European Union countries              | Social welfare spending                                                                               | All-cause mortality, cause-specific mortality         | Positive     |
| 96 | Van der Heuvel et al, 2013 | 1950-2000  | Ecological | Yes | Sweden, Netherlands, Canada, USA, Cuba         | Welfare regimes, Redistributive welfare policy                                                        | Infant mortality, low birth weight, under 5 mortality | Positive     |
| 97 | Van der Wel et al, 2011    | 2005       | Ecological | Yes | 26 European countries                          | Income equality, spending on active labour market policies, benefit generosity, employment protection | Social inequality in sickness                         | Positive     |
| 98 | Van Tuyckom, 2011          | Up to 2008 | Individual | Yes | 24,846 people from 27 European Union countries | Healthcare spending                                                                                   | Physical activity                                     | Positive     |

|     |                            |      |            |     |                                                           |                                                                   |                                        |              |
|-----|----------------------------|------|------------|-----|-----------------------------------------------------------|-------------------------------------------------------------------|----------------------------------------|--------------|
| 99  | Vahid Shahidi et al, 2016  | 2012 | Individual | Yes | 22123 individuals from 23 countries with a welfare state  | Welfare social policy                                             | Self-rated health of the unemployed    | Positive     |
| 100 | Vöörmann and Helemäe, 2013 | 2010 | Individual | Yes | 5480 individuals from 4 Eastern European countries        | Welfare regimes                                                   | Self-rated health, health inequalities | Inconclusive |
| 101 | Wu and Chiang,2007         | 2002 | Ecological | Yes | Taiwan and 21 comparison industrialized countries         | Income inequality, healthcare spending, public social expenditure | Child mortality, under-five mortality  | Positive     |
| 102 | York and Bell, 2014        | 2005 | Ecological | Yes | Countries from the World Bank database with relevant data | Healthcare spending, gender equality policies                     | Self-reported life satisfaction (0-10) | Positive     |

1  
2  
3  
4  
5  
6  
7  
8  
9  
10  
11  
12  
13  
14  
15  
16  
17  
18  
19  
20  
21  
22  
23  
24  
25  
26  
27  
28  
29  
30  
31  
32  
33  
34  
35  
36  
37  
38  
39  
40  
41  
42  
43  
44  
45  
46  
47

**Supplementary file 8. Table of study-level characteristics and results for political tradition**

| Serial number                       | Authors, publication year   | Years of study | Level of analysis | Assessment of economic factors | Setting                                                 | Political exposures                                      | Population health outcomes                               | Result category |
|-------------------------------------|-----------------------------|----------------|-------------------|--------------------------------|---------------------------------------------------------|----------------------------------------------------------|----------------------------------------------------------|-----------------|
| <b>Studies from the 2010 review</b> |                             |                |                   |                                |                                                         |                                                          |                                                          |                 |
| 1                                   | Borrell et al, 2009         | 2000           | Individual        | Yes                            | 196,280 persons from 13 European countries              | Political tradition classification                       | Self-rated health                                        | Positive        |
| 2                                   | Cereseto and Waitzkin, 1986 | 1983-1984      | Ecological        | Yes                            | 123 countries, grouped by level of economic development | Political-economic system                                | Physical quality of life index                           | Positive        |
| 3                                   | Chung and Muntaner, 2006    | 1960-1994      | Ecological        | Yes                            | 19 OECD countries                                       | Voter partisanship                                       | Low birth weight, infant mortality, under-five mortality | Positive        |
| 4                                   | Correa and Namkoong, 1992   | 1980           | Ecological        | Yes                            | 116 countries with a population over 1 million          | Political conditions; political tradition classification | Life expectancy, mortality                               | Positive        |

|    |                           |           |            |     |                                                |                                                                             |                                                                                             |          |
|----|---------------------------|-----------|------------|-----|------------------------------------------------|-----------------------------------------------------------------------------|---------------------------------------------------------------------------------------------|----------|
| 5  | Espelt et al, 2008        | 2004      | Individual | Yes | 16,901 persons in 9 European countries         | Political tradition classification                                          | Self-reported health, long-term illness                                                     | Positive |
| 6  | Lena and London, 1993     | 1983      | Ecological | Yes | Up to 84 peripheral and non-core nations       | Political tradition classification                                          | Infant mortality, child mortality, life expectancy                                          | Positive |
| 7  | London and Williams, 1990 | 1965-1970 | Ecological | Yes | Up to 110 periphery and semi-periphery nations | Political tradition classification                                          | Infant mortality, life expectancy                                                           | Positive |
| 8  | Moon and Dixon, 1985      | 1970-1975 | Ecological | Yes | 116 nations                                    | Political ideology (left, right, centre)                                    | Physical Quality of Life Index: life expectancy, infant mortality                           | Positive |
| 9  | Muntaner et al, 2002      | 1989-1992 | Ecological | Yes | 16 wealthy countries                           | Working class power, voter partisanship, time in power by different parties | Life expectancy, self-rated health, low birth weight, and age- and cause-specific mortality | Positive |
| 10 | Navarro et al, 2003       | 1950-1998 | Ecological | Yes | 17 OECD countries                              | Working class power, voter partisanship                                     | Infant mortality, life expectancy, health inequalities                                      | Positive |
| 11 | Navarro and Shi, 2001     | 1960-1996 | Ecological | Yes | 18 OECD countries                              | Political tradition classification,                                         | Infant mortality,                                                                           | Positive |

1  
2  
3  
4  
5  
6  
7  
8  
9  
10  
11  
12  
13  
14  
15  
16  
17  
18  
19  
20  
21  
22  
23  
24  
25  
26  
27  
28  
29  
30  
31  
32  
33  
34  
35  
36  
37  
38  
39  
40  
41  
42  
43  
44  
45  
46  
47

|                                |                            |           |            |     |                                  |                                                                                      |                                                   |              |
|--------------------------------|----------------------------|-----------|------------|-----|----------------------------------|--------------------------------------------------------------------------------------|---------------------------------------------------|--------------|
|                                |                            |           |            |     |                                  | working class power                                                                  | health inequalities                               |              |
| 12                             | Navarro et al, 2006        | 1972-1996 | Ecological | Yes | 17 OECD countries                | Voter partisanship, time in power by different parties                               | Infant mortality, life expectancy                 | Positive     |
| <b>Studies from our update</b> |                            |           |            |     |                                  |                                                                                      |                                                   |              |
| 13                             | Bosdriesz et al, 2015      | 1996-2010 | Ecological | Yes | 11 European Union countries      | Percentage of seats held by social democratic, socialist and other left-wing parties | Tobacco Control Scale                             | Positive     |
| 14                             | Granados, 2010             | 1950-2000 | Ecological | Yes | 8 European countries             | Political tradition classification                                                   | Life expectancy, mortality, tobacco consumption   | Inconclusive |
| 15                             | Huijts et al, 2010         | 2002-2006 | Individual | Yes | 29 European countries and Israel | Political tradition classification                                                   | Self-rated health                                 | Positive     |
| 16                             | Lin et al, 2012            | 1970-2004 | Ecological | Yes | 119 less developed countries     | Political regime score from Polity IV                                                | Life expectancy                                   | Positive     |
| 17                             | Mackenbach and McKee, 2013 | 1990-2009 | Ecological | Yes | 43 European countries            | Left-wing participation in government (share of seats)                               | Success in implementing effective health policies | Inconclusive |

Supplementary file 9. Table of study-level characteristics and results for democracy

| Serial number                   | Authors, publication year  | Years of study | Level of analysis | Setting                                        | Assessment of economic factors | Political exposures                               | Population health outcomes                                                      | Result category |
|---------------------------------|----------------------------|----------------|-------------------|------------------------------------------------|--------------------------------|---------------------------------------------------|---------------------------------------------------------------------------------|-----------------|
| <b>Studies from 2010 review</b> |                            |                |                   |                                                |                                |                                                   |                                                                                 |                 |
| 1                               | Adeyi, 1997                | 1989-1993      | Ecological        | 10 former Communist countries                  | No                             | Transition from Communism to capitalist democracy | Life expectancy, infant mortality, probability of dying between 15 and 65 years | Negative        |
| 2                               | Alvarez-Dardet, 2006       | 2000           | Ecological        | 23 former Communist countries                  | Yes                            | Democratic deficit                                | Life expectancy, infant mortality, maternal mortality                           | Positive        |
| 3                               | Baum and Lake, 2003        | 1967-1997      | Ecological        | 128 poor and non-poor countries                | Yes                            | Democracy (Polity III)                            | Female life expectancy                                                          | Positive        |
| 4                               | Besley and Kudamatsu, 2006 | 1962-2002      | Ecological        | Up to 160 countries transitioning to democracy | Yes                            | Democracy (Polity IV)                             | Life expectancy, infant mortality                                               | Positive        |



|    |                            |           |            |                                                           |     |                                                        |                                                                 |              |
|----|----------------------------|-----------|------------|-----------------------------------------------------------|-----|--------------------------------------------------------|-----------------------------------------------------------------|--------------|
| 5  | Franco, 2004               | 1998      | Ecological | 170 high, medium and low-income countries                 | Yes | Democracy (Freedom House)                              | Life expectancy, infant mortality, maternal mortality           | Positive     |
| 6  | Frey and Al-Roumi, 1999    | 1970-1990 | Ecological | 87 developed and less-developed countries                 | No  | Democracy (political rights index and civil liberties) | Infant mortality, life expectancy                               | Positive     |
| 7  | Gauri and Khaleghian, 2002 | 1989-1997 | Ecological | 208 low and middle-income countries                       | Yes | Democracy (Polity IV)                                  | Vaccine coverage for diphtheria, tetanus, pertussis and measles | Negative     |
| 8  | Ghobareh et al, 2004       | 2000      | Ecological | 179 countries in WHO                                      | Yes | Democracy (Polity IV, Freedom House)                   | Health-adjusted life expectancy                                 | Positive     |
| 9  | Gizeles, 2009              | 1982-2000 | Ecological | 117 developed and developing countries                    | Yes | Democracy (Polity IV), state capacity                  | AIDS infection rate                                             | Positive     |
| 10 | Houweling et al, 2005      | 1999      | Ecological | 43 developing countries in Asia, Africa and Latin America | Yes | Democracy (political rights index)                     | Under five mortality rate                                       | Inconclusive |
| 11 | Kick et al, 1990           | 1970-1985 | Ecological | 63 developing countries                                   | Yes | Political democracy (political rights index)           | Infant mortality                                                | Positive     |

|    |                           |           |            |                                                      |     |                                                                                               |                                                                   |              |
|----|---------------------------|-----------|------------|------------------------------------------------------|-----|-----------------------------------------------------------------------------------------------|-------------------------------------------------------------------|--------------|
| 12 | Klomp and de Haan, 2009   | 2000-2005 | Ecological | 171 countries with a population greater than 200,000 | Yes | Decree of democracy, political stability                                                      | 19 national health indicators                                     | Positive     |
| 13 | Lake and Baum, 2001       | 1970-1992 | Ecological | Up to 110 developed countries                        | No  | Democracy (Polity III)                                                                        | Life expectancy, infant mortality                                 | Positive     |
| 14 | Lena and London; 1993     | 1983      | Ecological | Up to 84 peripheral and non-core nations             | Yes | Level of democracy                                                                            | Infant mortality, child mortality, life expectancy                | Positive     |
| 15 | London and Williams; 1990 | 1965-1970 | Ecological | Up to 110 periphery and semi-periphery nations       | Yes | Level of political democracy                                                                  | Infant mortality, life expectancy                                 | Positive     |
| 16 | Moon and Dixon, 1985      | 1970-1975 | Ecological | 116 nations                                          | Yes | Level of political democracy, political stability                                             | Physical Quality of Life Index: life expectancy, infant mortality | Positive     |
| 17 | Navia and Zweifel, 2003   | 1990-1997 | Ecological | 188 democratic or dictatorial countries              | Yes | Democracy (yes or no, based on presence of elections)                                         | Fertility, child survival                                         | Positive     |
| 18 | Pillai and Gupta, 2006    | 2001      | Ecological | 129 developing countries                             | No  | Democracy (human rights rating, political rights, and civil liberty, political terror scales) | 10 global monitoring indicators of women's reproductive health    | Positive     |
| 19 | Ross, 2006                | 1970-2000 | Ecological | 168 countries with a population                      | Yes | Democracy (Polity IV), years of                                                               | Child mortality, infant mortality                                 | Inconclusive |

1  
2  
3  
4  
5  
6  
7  
8  
9  
10  
11  
12  
13  
14  
15  
16  
17  
18  
19  
20  
21  
22  
23  
24  
25  
26  
27  
28  
29  
30  
31  
32  
33  
34  
35  
36  
37  
38  
39  
40  
41  
42  
43  
44  
45  
46  
47

|    |                         |           |            |                                                     |     |                                                    |                                                                               |              |
|----|-------------------------|-----------|------------|-----------------------------------------------------|-----|----------------------------------------------------|-------------------------------------------------------------------------------|--------------|
|    |                         |           |            | greater than 200,000                                |     | democracy since 1900                               |                                                                               |              |
| 20 | Rudra and Haggard, 2005 | 1975-1997 | Ecological | 57 less developed countries                         | Yes | Democracy (Polity IV)                              | Infant mortality                                                              | Positive     |
| 21 | Safaei, 2006            | 2003      | Ecological | 118 autocratic, incoherent and democratic countries | Yes | Democracy (Polity IV)                              | Life expectancy, mortality rate, child mortality rate                         | Positive     |
| 22 | Shandra et al, 2004     | 1980-1997 | Ecological | 59 developing countries                             | Yes | Level of political democracy                       | Infant mortality                                                              | Positive     |
| 23 | Shandra et al, 2010     | 1990-2005 | Ecological | 74 low income countries                             | Yes | Democracy (Polity IV)                              | Infant mortality                                                              | Positive     |
| 24 | Stroup, 2007            | 1980-2000 | Ecological | Up to 105 countries                                 | Yes | Political Rights Index (Freedom House)             | Life expectancy, child mortality                                              | Positive     |
| 25 | Tsai, 2006              | 1975-1998 | Ecological | 119 developing countries                            | Yes | Democracy (majority rule and political contention) | Life expectancy, infant mortality under one year, infant mortality under five | Inconclusive |
| 26 | Wejnert, 2008           | 1970-2005 | Ecological | 58 core and peripheral countries                    | Yes | Democracy (Polity IV)                              | Maternal care, fertility rate, maternal mortality, women life expectancy      | Inconclusive |
| 27 | Zweifel and Navia, 2000 | 1950-1990 | Ecological | 138 democratic or                                   | Yes | Democracy (yes or no, defined)                     | Infant mortality                                                              | Positive     |

|                                |                             |               |            | dictatorial countries                           |     | by presence of elections)                    |                                        |              |
|--------------------------------|-----------------------------|---------------|------------|-------------------------------------------------|-----|----------------------------------------------|----------------------------------------|--------------|
| <b>Studies from our update</b> |                             |               |            |                                                 |     |                                              |                                        |              |
| 28                             | Batniji et al, 2014         | 1980-2011     | Ecological | 22 Arab countries                               | Yes | Extent of democracy                          | Mortality                              | Inconclusive |
| 29                             | Burroway, 2016              | 1995-2008     | Individual | 52 developing countries                         | Yes | Democracy (Polity IV)                        | Child diarrhoea and malnutrition       | Inconclusive |
| 30                             | Chuang et al, 2013          | 1980-2009     | Ecological | 46 less-developed countries                     | Yes | Democracy (Polity IV)                        | Infant mortality                       | Positive     |
| 31                             | Chuang et al, 2013          | 1980-2009     | Ecological | 46 less-developed countries                     | Yes | Democracy (Polity IV)                        | Under-5 mortality                      | Inconclusive |
| 32                             | Dietrich and Bernhard, 2015 | 1980s to 2012 | Ecological | 88 countries that were not OECD members in 1984 | Yes | Democracy (Polity IV)                        | Infant mortality, basic nutrition      | Inconclusive |
| 33                             | Doherty and Kelly, 2010     | Not stated    | Individual | 30,816 individuals from 17 European countries   | Yes | Satisfaction with democracy on 0-10 scale    | Self-reported happiness on 0-10 scales | Positive     |
| 34                             | Fumagalli et al, 2013       | 1990-2007     | Ecological | 47 developing countries                         | Yes | Democracy (Polity IV), political competition | BMI                                    | Positive     |
| 35                             | Hauck et al, 2012           | 1990-2012     | Ecological | 54 low-income studies                           | Yes | Democracy (Polity IV)                        | Life expectancy                        | Positive     |
| 36                             | Klenk et al, 2016           | 1950-2010     | Ecological | 64 countries from WHO                           | Yes | Democratization                              | Mortality                              | Positive     |

1  
2  
3  
4  
5  
6  
7  
8  
9  
10  
11  
12  
13  
14  
15  
16  
17  
18  
19  
20  
21  
22  
23  
24  
25  
26  
27  
28  
29  
30  
31  
32  
33  
34  
35  
36  
37  
38  
39  
40  
41  
42  
43  
44  
45  
46  
47

|    |                            |                                  |                     |                                        |     |                                                                   |                                                   |          |
|----|----------------------------|----------------------------------|---------------------|----------------------------------------|-----|-------------------------------------------------------------------|---------------------------------------------------|----------|
|    |                            |                                  |                     | mortality database                     |     |                                                                   |                                                   |          |
| 37 | Krueger et al, 2015        | 2002-2004                        | Individual          | 313,554 individuals from 67 countries  | Yes | Democracy variable resulting from factor analysis of 7 indicators | Self-rated health                                 | Positive |
| 38 | Kudamatsu, 2012            | Up to 2004                       | Ecological          | Sub-Saharan African countries          | Yes | Democratization                                                   | Infant mortality                                  | Positive |
| 39 | Mackenbach, 2013           | 1900-2008                        | Ecological          | European countries                     | No  | Democracy (binary)                                                | Life expectancy                                   | Positive |
| 40 | Mackenbach et al, 2013     | 1960-2008                        | Ecological          | European countries                     | Yes | Democratization                                                   | Life expectancy                                   | Positive |
| 41 | Mackenbach and McKee, 2013 | 1990-2009                        | Ecological          | 43 European countries                  | Yes | Democracy (+10 to -10)                                            | Success in implementing effective health policies | Positive |
| 42 | Maynard, 2016              | 1985-2005                        | Ecological analysis | 74 developing countries                | Yes | Democracy (Freedom House)                                         | Tuberculosis mortality                            | Positive |
| 43 | Minagawa, 2013             | 1990-2009                        | Ecological analysis | 23 Eastern European countries          | Yes | Freedom (Freedom House, Heritage Foundation)                      | Age-specific mortality, self-rated health         | Positive |
| 44 | Witvliet et al, 2013       | From 2000, end date not reported | Individual          | 72524 adults from 20 African countries | Yes | Transparency and freedom from corruption                          | Self-rated health                                 | Positive |

Supplementary file 10. Table of study-level characteristics and results for globalisation

| Serial number | Authors, publication year | Years of study | Level of analysis | Setting                                          | Political exposures                                                                                      | Population health outcomes | Result category |
|---------------|---------------------------|----------------|-------------------|--------------------------------------------------|----------------------------------------------------------------------------------------------------------|----------------------------|-----------------|
| 1             | Moore et al, 2006         | 2000           | Ecological        | 128 countries divided into 6 world-system blocks | National trade, world-system role                                                                        | Infant mortality           | Positive        |
| 2             | Shandra et al, 2004       | 1980-1997      | Ecological        | 59 developing countries                          | Commodity concentration, multinational corporate penetration, international monetary fund conditionality | Infant mortality           | Negative        |
| 3             | Shen and Williamson, 2001 | 1965-1991      | Ecological        | 82 less developed countries                      | Foreign trade, foreign investment, debt increase                                                         | Infant mortality           | Negative        |
| 4             | Shen and Williamson, 1997 | 1960-1991      | Ecological        | 86 less developed countries                      | Foreign investment, debt dependency                                                                      | Child survival probability | Negative        |

1  
2  
3  
4  
5  
6  
7  
8  
9  
10  
11  
12  
13  
14  
15  
16  
17  
18  
19  
20  
21  
22  
23  
24  
25  
26  
27  
28  
29  
30  
31  
32  
33  
34  
35  
36  
37  
38  
39  
40  
41  
42  
43  
44  
45  
46

| Studies from our update |                                |            |            |                                             |                                                                                                                                       |                                    |              |
|-------------------------|--------------------------------|------------|------------|---------------------------------------------|---------------------------------------------------------------------------------------------------------------------------------------|------------------------------------|--------------|
| 5                       | Bergh and Nilsson, 2010        | 1970-2005  | Ecological | 92 high-, middle- and low-income countries  | KOF index                                                                                                                             | Life expectancy                    | Positive     |
| 6                       | Bozorgmehr and Sebastian, 2014 | 1990-2010  | Ecological | 22 high-burden tuberculosis countries       | World Trade Organization membership status and duration, trade as a percentage of GDP, Economic Freedom of the World Index, KOF Index | Tuberculosis incidence             | Inconclusive |
| 7                       | Chuang et al, 2013             | 1980-2009  | Ecological | 46 less-developed countries                 | Debt, foreign investment                                                                                                              | Infant mortality                   | Inconclusive |
| 8                       | Chuang et al, 2013             | 1980-2009  | Ecological | 46 less-developed countries                 | Debt, foreign investment                                                                                                              | Under-5 mortality                  | Inconclusive |
| 9                       | Costa Font and Mas, 2016       | 1989-2005  | Ecological | 26 countries                                | KOF Index, CSGR Index                                                                                                                 | Obesity prevalence, caloric intake | Negative     |
| 10                      | Cross et al, 2009              | Not stated | Individual | UK, Spain, Kenya and Uganda                 | Localised or globalised food supply system                                                                                            | Health-related quality of life     | Positive     |
| 11                      | De Vogli et al, 2014           | 1980-2008  | Ecological | 127 low-, middle- and high-income countries | KOF Index                                                                                                                             | BMI                                | Negative     |

|    |                            |            |                            |                                   |                                                                                                                                       |                                                                                                                                                                                                                    |          |
|----|----------------------------|------------|----------------------------|-----------------------------------|---------------------------------------------------------------------------------------------------------------------------------------|--------------------------------------------------------------------------------------------------------------------------------------------------------------------------------------------------------------------|----------|
| 12 | Estimé et al, 2014         | 2005-2010  | Household-level ecological | Pacific nations                   | Food imports                                                                                                                          | Obesity                                                                                                                                                                                                            | Negative |
| 13 | Fan and Faioso Le'au, 2015 | Up to 2014 | Ecological                 | Independent and American Samoa    | Westernisation                                                                                                                        | Life expectancy, neonatal and child mortality, measles immunisation, diabetes mortality, cancer mortality, cerebrovascular disease mortality, heart disease mortality, pneumonia mortality, overweight and obesity | Negative |
| 14 | Gerring and Thacker, 2008  | 1960-1999  | Ecological                 | All countries with available data | Open international trade policies, low-inflation macroeconomic environments, market-oriented property rights, GATT and WTO membership | Infant mortality                                                                                                                                                                                                   | Positive |
| 15 | Goryakin et al, 2015       | 1991-2009  | Individual                 | Up to 887,00 women in 56          | KOF Index                                                                                                                             | Overweight and obesity                                                                                                                                                                                             | Negative |



1  
2  
3  
4  
5  
6  
7  
8  
9  
10  
11  
12  
13  
14  
15  
16  
17  
18  
19  
20  
21  
22  
23  
24  
25  
26  
27  
28  
29  
30  
31  
32  
33  
34  
35  
36  
37  
38  
39  
40  
41  
42  
43  
44  
45  
46

|    |                          |            |            |                                           |                                                                           |                                                                                |              |
|----|--------------------------|------------|------------|-------------------------------------------|---------------------------------------------------------------------------|--------------------------------------------------------------------------------|--------------|
|    |                          |            |            | low- and middle-income countries          |                                                                           |                                                                                |              |
| 16 | Hauck et al, 2012        | 1990-2012  | Ecological | 54 low-income studies                     | Terms of international trade, foreign investment, debt service and relief | Life expectancy                                                                | Inconclusive |
| 17 | Jolly et al, 2013        | 2002       | Ecological | 27 Latin American and Caribbean countries | Net food import                                                           | Obesity                                                                        | Negative     |
| 18 | Jorgenson, 2009          | 1980-2000  | Ecological | Less-developed countries                  | Foreign direct investment                                                 | Water pollution                                                                | Negative     |
| 19 | Jorgenson, 2009          | 1980-2000  | Ecological | Less-developed countries                  | Foreign direct investment, export intensity                               | Water pollution                                                                | Negative     |
| 20 | Levine and Rothman, 2006 | Up to 1990 | Ecological | Up to 130 countries                       | Economic openness                                                         | Infant mortality, under-5 mortality, anthropometric measures of child stunting | Inconclusive |
| 21 | Martens et al, 2010      | Up to 2008 | Ecological | Global, subject to data availability      | Maastricht Globalization Index                                            | Infant mortality, under-5 mortality, adult mortality                           | Positive     |
| 22 | Maynard, 2015            | 2000-2010  | Ecological | Up to 85 low- and middle-                 | IGTA membership and status,                                               | Youth smoking rates (Global Youth Tobacco Survey)                              | Negative     |

|    |                               |            |            |                                  |                                               |                                                    |              |
|----|-------------------------------|------------|------------|----------------------------------|-----------------------------------------------|----------------------------------------------------|--------------|
|    |                               |            |            | income countries                 | trade, imports, exports                       |                                                    |              |
| 23 | Maynard, 2016                 | 1985-2005  | Ecological | 74 developing countries          | Debt, trade dependency                        | Tuberculosis mortality                             | Inconclusive |
| 24 | Milner et al, 2011            | 1980-2006  | Ecological | 35 countries                     | A globalisation index developed for the study | Suicide rate                                       | Negative     |
| 25 | Mukherjee and Kriekhaus, 2011 | 1970-2007  | Ecological | 132 countries                    | Economic, political and social globalisation  | Infant mortality, life expectancy, child mortality | Positive     |
| 26 | Oberlander et al, 2017        | 1970-2011  | Ecological | 70 countries                     | Social globalisation, trade openness          | Nutritional health                                 | Inconclusive |
| 27 | Oster, 2010                   | Up to 2007 | Ecological | UN countries with available data | Export activity                               | HIV                                                | Negative     |
| 28 | Owen and Wu, 2007             | 1960-1995  | Ecological | 219 countries                    | Openness to trade                             | Life expectancy, infant mortality                  | Positive     |

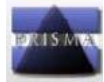

# PRISMA 2009 Checklist

| Section/topic                      | #  | Checklist item                                                                                                                                                                                                                                                                                              | Reported on page #       |
|------------------------------------|----|-------------------------------------------------------------------------------------------------------------------------------------------------------------------------------------------------------------------------------------------------------------------------------------------------------------|--------------------------|
| <b>TITLE</b>                       |    |                                                                                                                                                                                                                                                                                                             |                          |
| Title                              | 1  | Identify the report as a systematic review, meta-analysis, or both.                                                                                                                                                                                                                                         | 1                        |
| <b>ABSTRACT</b>                    |    |                                                                                                                                                                                                                                                                                                             |                          |
| Structured summary                 | 2  | Provide a structured summary including, as applicable: background; objectives; data sources; study eligibility criteria, participants, and interventions; study appraisal and synthesis methods; results; limitations; conclusions and implications of key findings; systematic review registration number. | 2                        |
| <b>INTRODUCTION</b>                |    |                                                                                                                                                                                                                                                                                                             |                          |
| Rationale                          | 3  | Describe the rationale for the review in the context of what is already known.                                                                                                                                                                                                                              | 4-5                      |
| Objectives                         | 4  | Provide an explicit statement of questions being addressed with reference to participants, interventions, comparisons, outcomes, and study design (PICOS).                                                                                                                                                  | 5                        |
| <b>METHODS</b>                     |    |                                                                                                                                                                                                                                                                                                             |                          |
| Protocol and registration          | 5  | Indicate if a review protocol exists, if and where it can be accessed (e.g., Web address), and, if available, provide registration information including registration number.                                                                                                                               | NA                       |
| Eligibility criteria               | 6  | Specify study characteristics (e.g., PICOS, length of follow-up) and report characteristics (e.g., years considered, language, publication status) used as criteria for eligibility, giving rationale.                                                                                                      | 6                        |
| Information sources                | 7  | Describe all information sources (e.g., databases with dates of coverage, contact with study authors to identify additional studies) in the search and date last searched.                                                                                                                                  | 6                        |
| Search                             | 8  | Present full electronic search strategy for at least one database, including any limits used, such that it could be repeated.                                                                                                                                                                               | Table 1                  |
| Study selection                    | 9  | State the process for selecting studies (i.e., screening, eligibility, included in systematic review, and, if applicable, included in the meta-analysis).                                                                                                                                                   | 5-7                      |
| Data collection process            | 10 | Describe method of data extraction from reports (e.g., piloted forms, independently, in duplicate) and any processes for obtaining and confirming data from investigators.                                                                                                                                  | 7                        |
| Data items                         | 11 | List and define all variables for which data were sought (e.g., PICOS, funding sources) and any assumptions and simplifications made.                                                                                                                                                                       | 7                        |
| Risk of bias in individual studies | 12 | Describe methods used for assessing risk of bias of individual studies (including specification of whether this was done at the study or outcome level), and how this information is to be used in any data synthesis.                                                                                      | 7                        |
| Summary measures                   | 13 | State the principal summary measures (e.g., risk ratio, difference in means).                                                                                                                                                                                                                               | 7, but not meta-analysis |



# PRISMA 2009 Checklist

|                      |    |                                                                                                                                                           |                         |
|----------------------|----|-----------------------------------------------------------------------------------------------------------------------------------------------------------|-------------------------|
| Synthesis of results | 14 | Describe the methods of handling data and combining results of studies, if done, including measures of consistency (e.g., $I^2$ ) for each meta-analysis. | 7, but no meta-analysis |
|----------------------|----|-----------------------------------------------------------------------------------------------------------------------------------------------------------|-------------------------|

Page 1 of 2

| Section/topic                 | #  | Checklist item                                                                                                                                                                                           | Reported on page #                  |
|-------------------------------|----|----------------------------------------------------------------------------------------------------------------------------------------------------------------------------------------------------------|-------------------------------------|
| Risk of bias across studies   | 15 | Specify any assessment of risk of bias that may affect the cumulative evidence (e.g., publication bias, selective reporting within studies).                                                             | NA, no meta-analysis                |
| Additional analyses           | 16 | Describe methods of additional analyses (e.g., sensitivity or subgroup analyses, meta-regression), if done, indicating which were pre-specified.                                                         | NA, no meta-analysis                |
| <b>RESULTS</b>                |    |                                                                                                                                                                                                          |                                     |
| Study selection               | 17 | Give numbers of studies screened, assessed for eligibility, and included in the review, with reasons for exclusions at each stage, ideally with a flow diagram.                                          | 7-8, Figure 2, Supplementary file 1 |
| Study characteristics         | 18 | For each study, present characteristics for which data were extracted (e.g., study size, PICOS, follow-up period) and provide the citations.                                                             | Tables 2-5                          |
| Risk of bias within studies   | 19 | Present data on risk of bias of each study and, if available, any outcome level assessment (see item 12).                                                                                                | 8, Supplementary file 3             |
| Results of individual studies | 20 | For all outcomes considered (benefits or harms), present, for each study: (a) simple summary data for each intervention group (b) effect estimates and confidence intervals, ideally with a forest plot. | Tables 2-5, no meta-analysis        |
| Synthesis of results          | 21 | Present results of each meta-analysis done, including confidence intervals and measures of consistency.                                                                                                  | NA, no meta-analysis                |
| Risk of bias across studies   | 22 | Present results of any assessment of risk of bias across studies (see Item 15).                                                                                                                          | NA, no meta-analysis                |
| Additional analysis           | 23 | Give results of additional analyses, if done (e.g., sensitivity or subgroup analyses, meta-regression [see Item 16]).                                                                                    | NA, no meta-analysis                |
| <b>DISCUSSION</b>             |    |                                                                                                                                                                                                          |                                     |
| Summary of evidence           | 24 | Summarize the main findings including the strength of evidence for each main outcome; consider their relevance to key groups (e.g., healthcare providers, users, and policy makers).                     | 10                                  |
| Limitations                   | 25 | Discuss limitations at study and outcome level (e.g., risk of bias), and at review-level (e.g., incomplete retrieval of identified research, reporting bias).                                            | 11-12                               |



# PRISMA 2009 Checklist

1  
2  
3  
4  
5  
6  
7  
8  
9  
10  
11  
12  
13  
14  
15  
16  
17  
18  
19  
20  
21  
22  
23  
24  
25  
26  
27  
28  
29  
30  
31  
32  
33  
34  
35  
36  
37  
38  
39  
40  
41  
42  
43  
44  
45  
46  
47

|                |    |                                                                                                                                            |       |
|----------------|----|--------------------------------------------------------------------------------------------------------------------------------------------|-------|
| Conclusions    | 26 | Provide a general interpretation of the results in the context of other evidence, and implications for future research.                    | 13-15 |
| <b>FUNDING</b> |    |                                                                                                                                            |       |
| Funding        | 27 | Describe sources of funding for the systematic review and other support (e.g., supply of data); role of funders for the systematic review. | 15    |

From: Moher D, Liberati A, Tetzlaff J, Altman DG, The PRISMA Group (2009). Preferred Reporting Items for Systematic Reviews and Meta-Analyses: The PRISMA Statement. PLoS Med 6(7): e1000097. doi:10.1371/journal.pmed1000097

For more information, visit: [www.prisma-statement.org](http://www.prisma-statement.org).

For peer review only

# BMJ Open

## How much evidence is there that political factors are related to population health outcomes? An internationally comparative systematic review

|                                 |                                                                                                                                                                                                                                                         |
|---------------------------------|---------------------------------------------------------------------------------------------------------------------------------------------------------------------------------------------------------------------------------------------------------|
| Journal:                        | <i>BMJ Open</i>                                                                                                                                                                                                                                         |
| Manuscript ID                   | bmjopen-2017-020886.R2                                                                                                                                                                                                                                  |
| Article Type:                   | Research                                                                                                                                                                                                                                                |
| Date Submitted by the Author:   | 02-Jun-2018                                                                                                                                                                                                                                             |
| Complete List of Authors:       | Barnish, Max; University of Exeter, Exeter Medical School<br>Tørnes, Michelle; University of Aberdeen Institute of Applied Health Sciences, Ageing Clinical and Experimental Research (ACER)<br>Horne, Becky ; Independent scholar, Independent scholar |
| <b>Primary Subject Heading</b>: | Health policy                                                                                                                                                                                                                                           |
| Secondary Subject Heading:      | Public health                                                                                                                                                                                                                                           |
| Keywords:                       | PUBLIC HEALTH, Health policy < HEALTH SERVICES ADMINISTRATION & MANAGEMENT, Political determinants of health, SOCIAL MEDICINE                                                                                                                           |
|                                 |                                                                                                                                                                                                                                                         |

SCHOLARONE™  
Manuscripts

1

2  
3 **How much evidence is there that political factors are related to population health**  
4 **outcomes? An internationally comparative systematic review**

5 Max Barnish,<sup>1</sup> Michelle Tørnes,<sup>2</sup> and Becky Horne<sup>3</sup>

6  
7 1 = Institute of Health Research, Exeter Medical School, University of Exeter, Exeter, UK

8  
9 2 = Ageing Clinical and Experimental Research (ACER), School of Medicine, Medical  
10 Sciences and Nutrition, University of Aberdeen, Aberdeen, UK

11  
12 3 = Independent Scholar, London, UK

13 Correspondence to: m.s.barnish@exeter.ac.uk (Dr M. Barnish)

14  
15  
16  
17  
18  
19  
20  
21  
22  
23  
24  
25  
26  
27  
28  
29  
30  
31  
32  
33  
34  
35  
36  
37  
38  
39  
40  
41  
42  
43  
44  
45  
46  
47  
48  
49  
50  
51  
52  
53  
54  
55  
56  
57  
58  
59  
60

For peer review only

2

**ABSTRACT**

**Objectives:** To provide a seven-year update of the most recent systematic review about the relationships between political features and population health outcomes.

**Setting:** Internationally comparative scholarly literature.

**Data sources:** Ten scholarly bibliographic databases plus supplementary searches in bibliographies and Google Scholar were used to update a previous systematic review. The final search was conducted in November 2017.

**Primary and secondary outcome measures:** Any population health outcome measure, apart from healthcare spending.

**Results:** 73 unique publications were identified from the previous systematic review. The database searches to update the literature identified 45,356 raw records with 35,207 remaining following deduplication. 55 publications were identified from supplementary searches. In total, 258 publications proceeded to full-text review and 176 were included in narrative synthesis. Eighty-five studies were assessed at low risk of bias, 89 at moderate risk of bias and none at high risk of bias. Assessment could not be conducted for 2 studies with only book chapters. No meta-analysis was conducted. 102 studies assessed welfare state generosity and 79 found a positive association. 17 studies assessed political tradition and 15 found a positive association with left-of-centre tradition. 44 studies assessed democracy and 34 found a positive association. 28 studies assessed globalisation and 14 found a negative association, while 7 were positive and 7 inconclusive.

**Conclusions:** This review concludes that welfare state generosity, left-of-centre democratic political tradition and democracy are generally positively associated with population health. Globalisation may be negatively associated with population health, but the results are less conclusive. It is important for the academic public health community to engage with the political evidence base in its research as well as in stakeholder engagement, in order to facilitate positive outcomes for population health.



**Strengths and limitations of this study**

- We offer the largest systematic review on the political determinants of population health.
- The use of a systematic review design offers a robust and reproducible method that minimises potential reviewer bias.
- Our review also involved searching ten major scholarly databases in addition to relevant supplementary searches.
- The internationally comparative approach ensures relevance to readers worldwide.
- Resources meant it was unfeasible to conduct a new review from inception rather than an update of a 2010 review.

For peer review only

## INTRODUCTION

### *Conceptualising politics*

Politics is an omnipresent feature of modern civilisations worldwide and has been described as the “practice of the art or science of directing and administrating states”.<sup>1</sup> Political views and systems differ substantially globally. However, they can usefully be conceptualised in terms of two axes. The first is democracy vs autocracy, and conceptualises the extent to which the population decides, either directly or indirectly, its government and governance.<sup>2</sup> The second is the left vs right axis, and conceptualises the extent to which a government intervenes in an attempt to secure social goals (progressive, left wing) or focuses on economic freedom and minimal state intervention (conservative, right wing).<sup>3</sup>

### *Opportunities for politics to influence population health*

One of the founding fathers of social medicine Rudolph Virchow said that “Medicine is a social science, and politics nothing but medicine at a larger scale”.<sup>4</sup> Indeed, many pathways to public health impact are political,<sup>5</sup> although the precise structures by which these operate differ between countries. Especially in developed countries, the existence of formal evidence-based systems is common in the licensing of medicines and medical devices (for example the European Medicines Agency and the Food and Drug Administration (United States of America)) and the development of national clinical guidelines and the approval for specific medicines and medical devices to be used in public sector health systems (for example the National Institute of Health and Care Excellence on behalf of the National Health Service in England and Wales).

Nevertheless, as Virchow said, health is about far more than medicine. For example, social and economic inequalities are strong predictors of health inequalities<sup>6-7</sup> and increased income inequality at a societal level has been shown to be strongly associated with worse health outcomes including life expectancy, infant mortality, obesity and mental health, as well as social outcomes such as trust, education level and social mobility.<sup>8</sup> However, there is

5

1  
2  
3 evidence that political ideology and personal interests can exert substantial influences on  
4 policy-making processes relevant to health, leading to marked evidence-policy gaps.<sup>9</sup>

5  
6 Political influences can operate at a variety of levels, including national governments,  
7  
8 devolved governments (see supplementary file 1 for an example), and local authorities,  
9  
10 which have taken a greater role in public health in recent years in many countries.<sup>10</sup>

### 11 12 13 ***Existing evidence about the relationship between politics and population health***

14  
15  
16 While single-country evidence such as the review by Scott-Samuel et al<sup>11</sup> on the  
17  
18 health effects of Thatcherism, and a recent studies on the effects of Conservative Party  
19  
20 austerity in England<sup>12-13</sup> can be valuable, internationally comparative evidence allows us to  
21  
22 transcend the particularities of individual countries. The most recent internationally  
23  
24 comparative systematic review that assessed a wide range of political features was  
25  
26 published in 2011 with searches up to April 2010 (the 2010 review).<sup>14</sup> It did not include a risk  
27  
28 of bias assessment. It assessed four key political features: democracy, welfare state, left-of-  
29  
30 centre political tradition and globalisation.

31  
32 The 'contestability'<sup>15</sup> inherent in democracy may be health-promoting due to the  
33  
34 potential electoral consequences of unpopular policies. Left-of-centre political tradition, and  
35  
36 an advanced welfare state which is a key marker thereof,<sup>3</sup> may be health-promoting due to a  
37  
38 greater focus on active state intervention to address social, economic and health  
39  
40 inequalities,<sup>6-8</sup> and consequent greater alignment to public health mission statements, such  
41  
42 as that of the European Public Health Association.<sup>16</sup> Globalisation is a multi-faceted concept,  
43  
44 but may include trade liberalisation and free-markets, which are more favoured by the  
45  
46 political right than the left.<sup>3</sup> The 2010 review suggested that globalisation was negatively  
47  
48 associated with population health outcomes, while democracy, welfare state and left-of-  
49  
50 centre political tradition were positively associated. The majority of studies had been  
51  
52 published in the five year period up to the search, indicating an active field of research. This  
53  
54 suggests that the 2010 review is likely now to be considerably out of date.

6

## ***Aims***

We offer an updated systematic review investigating relationships between four key political features (democracy, welfare state, political tradition, and globalisation) and population health outcomes. This represents the largest systematic review to date of evidence in this field.

## **METHODS**

### ***Design***

A narrative systematic review design was used following the internationally accepted PRISMA guidelines.<sup>17</sup> MB was the lead reviewer. Proportionate independent second review was performed by BH for each stage in the review process, whereby this author independently appraised 20% of records for each stage. There were few disagreements, and where these arose, they were resolved by discussion.

### ***Data sources***

As this was an updated systematic review, all included studies from the 2010 review proceeded directly to the full-text review stage. An update search was conducted on ten scholarly databases from 2010 to April 2017 inclusive (MEDLINE, AMED, EMBASE, PsycINFO (all Ovid), CINAHL, Philosopher's Index (both Ebsco), Science Citation Index Expanded, Social Sciences Citation Index, Emerging Sources Citation Index (all Web of Science) and Sociological Abstracts (ProQuest)), following the conceptual search strategy shown in Table 1, from which search strings for the syntax of each database were developed. The full MEDLINE search strategy is shown in Supplementary file 2. Supplementary searches back to 2006 were conducted on Google Scholar and in relevant bibliographies. The final search was conducted in November 2017.

### ***Inclusion criteria***

7

Records were screened initially by title and abstract, and then in full text form for potential inclusion according to the following criteria:

- Peer-reviewed journal article in a scientific journal or a scholarly book or chapter
- Study human populations either at the individual or ecological level
- Present at least one measure of a political exposure, conceptualised in terms of the welfare state, political tradition, democracy or globalisation. These political features were defined exactly following Muntaner et al, and listed in Table 2.<sup>14</sup>
- Present at least one measure of a population health outcome. Healthcare spending alone was not considered an eligible outcome
- Use any quantitative empirical design to link the exposure to the outcome
- Present a comparison involving at least 2 countries

#### **Data extraction**

Results were classified into one of four political themes – welfare state, political tradition, democracy and globalisation, as per Table 2. Studies were allowed to contribute to more than one political theme. The following information was extracted for each included study: i) bibliographic details, ii) sampling frame, iii) years of study, iv) design, v) political themes to which the study contributes, vi) measure(s) of political exposures, vii) measure(s) of population health outcome measures, and iix) results classification (positive, negative or inconclusive association between the political exposure and population health outcome measures).

#### **Risk of bias assessment**

Risk of bias assessment was conducted at the study level using the Threats to Validity Tool,<sup>18</sup> using the configuration of Barnish and Barnish,<sup>19</sup> with one modification. Loss-to-follow-up was not considered relevant for the body of studies included in this review. Following Barnish et al,<sup>20</sup> the categories were set as i) low risk of bias (high quality) if  $\geq 70\%$  of eligible items were assessed as at low risk of bias, ii) moderate risk of bias (moderate

8

1  
2  
3 quality) for 40-69%, and iii) high risk of bias (low quality) for  $\leq 39\%$ . This assessment could  
4 not be conducted for studies that only comprised of book chapters, since the tool is not  
5 suitable, and format incompatibility could introduce bias into the assessment.  
6  
7

### 8 9 **Data synthesis**

10  
11 In light of differences in political contexts between countries, and in terms of how  
12 political exposures and population health outcomes were measured, narrative synthesis was  
13 considered more appropriate than meta-analysis. Studies were grouped by political theme.  
14  
15 In addition to our base case analysis, certain scenario analyses were conducted to further  
16 explore the data:  
17  
18  
19  
20

- 21  
22 1. Studies that take economic factors into consideration, for each of the four themes  
23 except globalisation
- 24  
25 2. Studies that include developing countries, for each of the four themes
- 26  
27 3. Studies looking at general health or quality of life, for each of the four themes
- 28  
29 4. Studies using a welfare regime classification scheme, for the welfare state theme
- 30  
31 5. Studies using a political tradition classification scheme, for the political tradition  
32 theme  
33  
34  
35  
36

37 The scenario analysis on economic factors was not conducted for the globalisation theme  
38 because globalisation itself has a dominant economic component, so this is already  
39 measured. A formal test of economic mediation was not required – it was sufficient that  
40 studies took economic factors into consideration.  
41  
42  
43  
44

### 45 **Patient and public involvement**

46  
47 This is a systematic review of a broad range of population health outcomes and could not be  
48 represented by one patient group. Therefore, patients were not involved in the conduct of the  
49 study. There was no recruitment since this is a systematic review. The project director (MB)  
50 shall respond to reputable media requests and may approach selected media outlets about  
51 the possibility of disseminating the research findings more broadly.  
52  
53  
54  
55  
56  
57  
58  
59  
60

## RESULTS

### *Search results*

Seventy-three de-duplicated records came from the 2010 review. Update database searches yielded 43, 356 records in total, of which 35,207 remained following deduplication. Supplementary searches on Google Scholar and in bibliographies yielded 55 additional records. From 35, 333 unique records, 255 proceeded to full-text screening and all were retrieved. 176 studies were included in our review (Supplementary file 3), of which 106 came from our update searches and 70 from the 2010 review. 82 studies were excluded at the full-text review stage (Supplementary file 4). Studies were published in final form a median of 6 years (IQR 4-8) after the year of final data collection and the longest lag was 20 years (Figure 1). The most recent data included in the analyses was collected in 2014. A PRISMA flowchart (Figure 2) and PRISMA checklist (Supplementary file 5) are provided. Eighty-five studies (49%) were assessed at low risk of bias, 89 (51%) at moderate risk of bias and none at high risk of bias. Risk of bias assessment could not be conducted for two studies (1% of total) whose only included publications came in the form of book chapters. Study-level risk of bias profiles are provided in Supplementary file 6.

### *Welfare state*

A total of 102 studies addressed the welfare state theme. Of these, 79 (77%) provided evidence that was favourable about the association of increased welfare state generosity with population health, 20 (20%) were inconclusive, and three (3%) were negative. Most studies either classified welfare state generosity in terms of a welfare regime classification or in terms of expenditure on health and social care. Welfare regime classifications did vary between studies, but often compared an 'advanced', e.g. Nordic<sup>21</sup> welfare regime with liberal and also market-driven/conservative alternatives. Health outcomes for welfare state studies included self-rated general health, quality of life,

10

1  
2  
3 prevalence of chronic conditions, mental health, life expectancy and child and infant  
4 mortality. Supplementary file 7 provides study-level details.

5  
6  
7 Among studies that took economic factors into consideration (n=83), 82% found a  
8 more generous welfare state to be positively associated with population health. Among  
9 studies including developing countries (n=23), 83% found this association. Among  
10 studies that used a general health or quality of life outcome (n=32), 69% found this association.  
11  
12 Considering only studies that used a welfare regime classification (n=45), 73% found this  
13 association.  
14  
15  
16  
17  
18

### 19 ***Political tradition***

20  
21  
22 A total of seventeen studies addressed the political tradition theme. Of these, 15  
23 (88%) were positive about the association of left-of-centre political tradition with population  
24 health, while two (12%) were inconclusive. Ways in which political tradition was measured  
25 included political tradition classification of ruling government, time in power by different  
26 parties, voter partisanship, proportion of seats held by left-wing or left-of-centre parties and  
27 working class power. Population health outcomes included life expectancy, infant and child  
28 mortality, life expectancy, older adult mortality, general self-rated health and successful  
29 implementation of effective health policies. Supplementary file 8 provides study-level details.  
30  
31  
32  
33  
34  
35  
36  
37  
38

39 All studies in the political tradition theme considered economic factors, so no  
40 scenario analysis was conducted on this factor. Among studies including developing  
41 countries, all (n=6) found left-of-centre political tradition to be positively associated with  
42 population health outcomes. Among studies that used a general health or quality of life  
43 outcome, all (n=6) found this association. Among studies that used a political tradition  
44 classification scheme (n=8), 88% found this association.  
45  
46  
47  
48  
49  
50

### 51 ***Democracy***

52  
53  
54 A total of 44 studies addressed the democracy theme. Of these, 34 (77%) were  
55 positive, eight (18%) were inconclusive and two (5%) negative. Ways in which democracy  
56  
57  
58  
59



11

1  
2  
3 was measured included political transition to democracy, years of democracy since 1900,  
4 the presence of elections and standardised indices such as Polity IV.<sup>22</sup> Population health  
5 outcomes included measures such as general self-rated health, life expectancy, older adult  
6 mortality, and successful implementation of effective health policies, while there was a  
7 particular focus on infant and child mortality and other child health outcomes. Supplementary  
8 file 9 provides study-level details.  
9  
10  
11  
12  
13

14  
15 Among studies taking economic factors into consideration (n=39), 77% found  
16 democracy to be positively associated with population health outcomes. Among studies  
17 including developing countries (n=25), 76% found this association. Among studies that used  
18 a general health or quality of life outcome, all (n=3) found this association.  
19  
20  
21  
22

### 23 **Globalisation**

24  
25  
26 A total of 28 studies addressed the globalisation theme. Of these, seven (25%) were  
27 positive, seven (25%) were inconclusive, and fourteen (50%) were negative. Measures of  
28 globalisation included world-system role, foreign trade, debt dependency, imports and  
29 exports, as well as membership of organisations such as the World Trade Organization and  
30 standardised indices such as the Maastricht Globalization Index<sup>23</sup> and the KOF Index.<sup>24</sup>  
31  
32 Many studies measured infant and child health outcomes and mortality, while assessed  
33 measures including life expectancy, obesity, water pollution and tobacco smoking rates.  
34  
35  
36  
37  
38  
39  
40  
41  
42  
43  
44  
45  
46  
47  
48  
49  
50  
51  
52  
53  
54  
55  
56  
57  
58  
59  
60  
Supplementary file 10 provides study-level results.

43 All globalisation studies included data from developing countries, so no scenario  
44 analysis was performed on this factor. Only one study in this theme assessed general health  
45 or quality of life, and found a positive association between globalisation and health-related  
46 quality of life.  
47  
48  
49

### 51 **Health outcomes**

52  
53  
54 Table 3 provides an overview of the results for each political exposure theme  
55 subdivided by health outcome. For the welfare state political exposure, the most commonly  
56  
57  
58  
59  
60

1  
2  
3 studied health outcomes were general health (n=35, 24 positive, 11 negative), life  
4 expectancy/adult mortality (n=28, 21 positive, 2 inconclusive, 5 negative), child mortality  
5 (n=13, 13 positive), and health inequalities (n=13, 11 positive, 2 inconclusive), noting that the  
6 latter are also measured indirectly through many of the other health outcomes in the table.  
7  
8 For political tradition, studies were more dispersed across outcomes, although the two  
9  
10 outcomes that received considerably more study than the others were life expectancy/adult  
11 mortality (n=9, 8 positive, 1 inconclusive) and infant mortality (n=8, 8 positive). For  
12  
13 democracy, by far the most widely studied outcomes were life expectancy/adult mortality  
14 (n=20, 16 positive, 1 negative, 3 inconclusive) and infant mortality (n=20, 15 positive, 1  
15  
16 negative, 4 inconclusive). Less consistent results were found for child mortality (n=10, 5  
17  
18 positive, 5 inconclusive).

19  
20  
21  
22  
23  
24  
25 For globalisation, studies were quite dispersed across outcomes and the results  
26  
27 patterning differed between outcomes, consistent with the evidence base in the review being  
28  
29 least conclusive for the globalisation outcome. For child mortality (n=6), the results were  
30  
31 equally split between positive (n=2), negative (n=2), and negative (n=2). The results were  
32  
33 also split for infant mortality (n=10, 4 positive, 3 negative, 3 inconclusive). For adult  
34  
35 mortality/life expectancy, there was a pattern in favour of a positive association with  
36  
37 globalisation (n=6, 4 positive, 1 negative, 1 inconclusive), while for nutritional, overweight  
38  
39 and obesity-related outcomes, the pattern was in favour of a negative association with  
40  
41 globalisation (n=6, 0 positive, 1 inconclusive, 5 negative).

## 42 43 44 **DISCUSSION**

### 45 46 47 ***Summary of findings***

48  
49  
50 We present a body of evidence from 176 internationally comparative scholarly  
51  
52 studies that together provides powerful evidence that key political characteristics are related  
53  
54 to a range of population health outcomes. The evidence was favourable about a positive  
55  
56 association with population health for all of increased welfare state generosity, left-of-centre  
57  
58  
59  
60

1  
2  
3 democratic political tradition and democracy, supported by over three quarters of eligible  
4 studies. Twice as much evidence supported a negative association with population health for  
5 globalisation than a positive association, although a quarter of studies were inconclusive.  
6  
7

### 8 9 **Scenario analyses**

10  
11  
12 Scenario analyses showed that i) most studies considered economic factors and  
13 excluding those that did not made little difference to the results, ii) apart from in the  
14 globalisation theme a minority of studies included developing countries but the results of  
15 those that did were generally consistent with those that did not, iii) classification schemes for  
16 welfare state and political tradition made little difference to the results, and iv) the proportion  
17 of studies using general health or quality of life outcome measures was relatively low, but the  
18 results were directionally consistent with the wider set of studies.  
19  
20  
21  
22  
23  
24  
25  
26

27  
28 In terms of analytical strategies to consider economic factors, a popular approach  
29 was to incorporate Gross Domestic Product (GDP) or Gross National Product (GNP) into the  
30 analytical modelling. Another approach used by some studies was to incorporate a measure  
31 of household income into the analysis. The former approach considers economic factors at  
32 the societal level, while the latter considers economic factors at the family level. The  
33 scenario analysis of studies including developing countries considered all studies that  
34 included developing countries, and was not restricted to studies that considered exclusively  
35 developing countries. The rationale for this was to provide an analysis in which any results  
36 particular to affluent, for example Organisation for Economic Co-operation and Development  
37 (OECD), countries, were excluded, thereby offering a broader and more representative  
38 insight into the relationship between political factors and global population health. Indeed,  
39 this was a systematic review of internationally comparative studies, in order to provide a  
40 global perspective. The scenario analysis provided for studies that included developing  
41 countries helps safeguard our findings against the potential that the observed findings are  
42 only applicable to affluent or developed countries. Many studies included data from a wide  
43  
44  
45  
46  
47  
48  
49  
50  
51  
52  
53  
54  
55  
56  
57  
58  
59  
60

14

1  
2  
3 range of countries, and combined with the approach of not excluding studies from the  
4  
5 scenario analysis that did not study exclusively developing countries, this offered a  
6  
7 safeguard against the potential dominance of data from a narrow set of countries. We  
8  
9 therefore do not consider that there is any evidence that the analyses in this report are  
10  
11 dominated by data from specific countries.  
12

### 13 ***Risk of bias assessment***

14  
15  
16 Eighty-five studies (49%) were assessed at low risk of bias, 89 (51%) at moderate  
17  
18 risk of bias and none at high risk of bias. However, low risk of bias of individual studies does  
19  
20 not mean that there is necessarily low risk of bias across studies, especially when grouping  
21  
22 so many heterogeneous studies. The three types of potential bias that were found quite  
23  
24 often were chance, group equivalence and potential conflict of interest. Most studies were  
25  
26 very large, however they tended not to provide a rationale for their sample size or provide  
27  
28 information to let us assess whether there may have been under- or indeed overpowered to  
29  
30 detect associations. Group equivalence is very hard to achieve in studies such as the ones  
31  
32 eligible for our review, since it would entail countries being similar in most other ways except  
33  
34 the political variable of interest. Substantive conflicts of interest were rare, but more of an  
35  
36 issue was an absence of funding statements or declarations as to whether there were any  
37  
38 conflicts of interest. This absence was particularly notable among studies published in social  
39  
40 science journals. No studies declared any party political members among the authors, yet it  
41  
42 seems incongruous to believe that no author among 176 health policy studies was a  
43  
44 member of a political party. Rather, it seems that political conflicts of interest are seldom  
45  
46 declared, when potentially they should.  
47  
48

### 49 ***Strengths***

50  
51  
52 We offer the largest systematic review on the political determinants of population  
53  
54 health, and the first wide ranging internationally comparative systematic review of similar  
55  
56 scope since 2010. The use of a systematic review design offers a robust and reproducible  
57  
58  
59

1  
2  
3 method that minimises potential reviewer bias in the selection and evaluation of studies for  
4 potential inclusion.<sup>25</sup> Our review also involved searching ten major scholarly databases and  
5 this very thorough coverage of the literature is reflected in a very low proportion of studies  
6 being identified from supplementary searches. All publications identified for full-text  
7 screening were successfully obtained. Conducting searches back to 2006 as part of our  
8 update enabled us to include a further ten eligible studies published before the search date  
9 of the 2010 review. We independently evaluated all studies from the 2010 review and  
10 allowed studies to contribute to multiple themes, allowing further relevant data to be  
11 included. The internationally comparative approach ensures relevance to readers worldwide  
12 and transcends the limitations associated with single-country studies. Unlike the authors of  
13 the 2010 review, we were able to provide a risk of bias assessment.

### 24 25 **Limitations**

26  
27  
28 Resources precluded a new review from inception, and required us to update an  
29 English-language only review from 2010. Moreover, conducting an update required us to  
30 maintain consistency with the 2010 review in terms of inclusion criteria, and precluded us  
31 from considering a wider range of grey literature sources, such as OECD reports, which may  
32 have relevant data. Moreover, the categorical form of data extraction in terms of positive,  
33 inconclusive or negative results followed this previous review and was necessitated by its  
34 scope and scale. Limiting reviews to the English language may not exert systematic bias in  
35 systematic reviews, at least according to evidence from reviews of healthcare  
36 interventions.<sup>26</sup> The diversity of political and health-system contexts as well as measures of  
37 political exposures and population health outcomes precluded meta-analysis. The  
38 internationally comparative approach increases relevance for an international readership, yet  
39 it introduces complexities in the mapping between political characteristics and political  
40 parties in both systematic and idiosyncratic ways.<sup>27-31</sup> Public health policy evidence is  
41 typically observational, which reflects real-world situations. Observational studies do not  
42 intrinsically overstate effect sizes<sup>32</sup> and can be highly valuable.<sup>5</sup> Causative inference can be  
43  
44  
45  
46  
47  
48  
49  
50  
51  
52  
53  
54  
55  
56  
57  
58  
59  
60

16

1  
2  
3 made more complicated by different causal pathways, different confounders, and different  
4  
5 covariates, although systems such as Bradford Hill<sup>33</sup> may be used as a starting point.  
6  
7 Studies did not regularly report their study design thoroughly or consistently in terms of  
8  
9 recognised design labels beyond the basics such as ecological vs individual studies, which  
10  
11 limited the level of detail in which information on study design could be extracted.  
12

### 13 ***Comparison with previous reviews***

14  
15  
16 Our review offers a seven and a half year search advance on the most recent  
17  
18 internationally comparative systematic review to offer an equivalent scope. The 2010 review  
19  
20 by Muntaner et al<sup>14</sup> included 73 studies, of which 70 were eligible for our review. Three were  
21  
22 excluded from our review since they only included healthcare spending as an outcome. We  
23  
24 considered that to be circular, since healthcare spending was also frequently used by  
25  
26 studies as a marker of welfare state generosity. To these 70 studies, we added a further 106  
27  
28 (10 of which were dated prior to the search of the 2010 review), giving a total of 176 studies  
29  
30 in our review. Those added by our update constituted 60% of the total (58% if the 10 studies  
31  
32 we added from prior to 2010 were removed from the numerator and denominator),  
33  
34 demonstrating how the scale of the evidence base for the political determinants of population  
35  
36 health has more than doubled over the past seven and a half years.  
37  
38

39  
40 The strength of evidence that welfare state generosity is positively associated with  
41  
42 population health has increased slightly (77% vs 72% positive), while the number of studies  
43  
44 has more than tripled (102 vs 32). The strength of evidence that left-of-centre political  
45  
46 tradition is positively associated with population health has increased markedly (88% vs 60%  
47  
48 positive), while the number of studies has increased modestly (17 vs 12). Notably, far fewer  
49  
50 studies have explicitly studied political tradition than the welfare state, which is one of the  
51  
52 key markers of political tradition. The strength of evidence that democracy is positively  
53  
54 associated with population health is largely unchanged (77% vs 78%), while the number of  
55  
56 studies has increased substantially (44 vs 27). The strength of evidence that globalisation is  
57  
58  
59  
60

17

1  
2  
3 negatively associated with population health has weakened (50% vs 75% negative), while  
4 the number of studies has increased sevenfold (28 vs 4).  
5  
6

7 A prior review in the interim<sup>34</sup> had found that the strength of evidence for the benefits  
8 of welfare state generosity was greater for studies assessing spending patterns than welfare  
9 regime typologies. We did not find a strong effect – 73% of studies assessing regime  
10 typologies were positive compared to 77% of studies irrespective of how the welfare state  
11 was measured. The Nordic model found in Scandinavia was presented by most studies as  
12 the example of an advanced welfare state. However, classifications used in these typologies  
13 are imperfect, and in many ways the Scottish system (see supplementary file 1) could be  
14 argued to represent a more advanced welfare state, since Norway for example does not  
15 offer universal free healthcare at point of use. Our findings on the welfare state and political  
16 tradition were also consistent with those of Scott-Samuel et al<sup>11</sup> regarding Thatcherism in the  
17 United Kingdom, which found a widening of health inequalities resultant from the introduction  
18 of reduced state welfare provision and increased privatisation and pro-market policies.  
19  
20  
21  
22  
23  
24  
25  
26  
27  
28  
29  
30

### 31 32 ***Perspectives on the role of academia*** 33

34  
35 The presentation of an evidence base from 176 studies associating political factors with a  
36 range of population health outcomes offers an opportunity for the reader to reflect on the role  
37 of public health academia, in light of university research impact policies in many countries,  
38 and recently scholarly debates on the role of academia. Academic public health has a long  
39 pro-social political history.<sup>35</sup> A recent BMJ article<sup>36</sup> offers insight into ongoing debate on the  
40 relative priority of action and research in public health, while Smith et al<sup>37</sup> reflect on whether  
41 or not advocacy is a disciplinary duty for public health academics, and Kapilashrami et al<sup>38</sup>  
42 provide an interesting example of an advocacy programme. Indeed, there has been  
43 reticence both at the individual<sup>4</sup> and organisational<sup>39</sup> level to engage in advocacy.  
44  
45  
46  
47  
48  
49  
50  
51  
52  
53  
54  
55  
56  
57  
58  
59  
60  
61  
62  
63  
64  
65  
66  
67  
68  
69  
70  
71  
72  
73  
74  
75  
76  
77  
78  
79  
80  
81  
82  
83  
84  
85  
86  
87  
88  
89  
90  
91  
92  
93  
94  
95  
96  
97  
98  
99  
100  
101  
102  
103  
104  
105  
106  
107  
108  
109  
110  
111  
112  
113  
114  
115  
116  
117  
118  
119  
120  
121  
122  
123  
124  
125  
126  
127  
128  
129  
130  
131  
132  
133  
134  
135  
136  
137  
138  
139  
140  
141  
142  
143  
144  
145  
146  
147  
148  
149  
150  
151  
152  
153  
154  
155  
156  
157  
158  
159  
160  
161  
162  
163  
164  
165  
166  
167  
168  
169  
170  
171  
172  
173  
174  
175  
176  
177  
178  
179  
180  
181  
182  
183  
184  
185  
186  
187  
188  
189  
190  
191  
192  
193  
194  
195  
196  
197  
198  
199  
200  
201  
202  
203  
204  
205  
206  
207  
208  
209  
210  
211  
212  
213  
214  
215  
216  
217  
218  
219  
220  
221  
222  
223  
224  
225  
226  
227  
228  
229  
230  
231  
232  
233  
234  
235  
236  
237  
238  
239  
240  
241  
242  
243  
244  
245  
246  
247  
248  
249  
250  
251  
252  
253  
254  
255  
256  
257  
258  
259  
260  
261  
262  
263  
264  
265  
266  
267  
268  
269  
270  
271  
272  
273  
274  
275  
276  
277  
278  
279  
280  
281  
282  
283  
284  
285  
286  
287  
288  
289  
290  
291  
292  
293  
294  
295  
296  
297  
298  
299  
300  
301  
302  
303  
304  
305  
306  
307  
308  
309  
310  
311  
312  
313  
314  
315  
316  
317  
318  
319  
320  
321  
322  
323  
324  
325  
326  
327  
328  
329  
330  
331  
332  
333  
334  
335  
336  
337  
338  
339  
340  
341  
342  
343  
344  
345  
346  
347  
348  
349  
350  
351  
352  
353  
354  
355  
356  
357  
358  
359  
360  
361  
362  
363  
364  
365  
366  
367  
368  
369  
370  
371  
372  
373  
374  
375  
376  
377  
378  
379  
380  
381  
382  
383  
384  
385  
386  
387  
388  
389  
390  
391  
392  
393  
394  
395  
396  
397  
398  
399  
400  
401  
402  
403  
404  
405  
406  
407  
408  
409  
410  
411  
412  
413  
414  
415  
416  
417  
418  
419  
420  
421  
422  
423  
424  
425  
426  
427  
428  
429  
430  
431  
432  
433  
434  
435  
436  
437  
438  
439  
440  
441  
442  
443  
444  
445  
446  
447  
448  
449  
450  
451  
452  
453  
454  
455  
456  
457  
458  
459  
460  
461  
462  
463  
464  
465  
466  
467  
468  
469  
470  
471  
472  
473  
474  
475  
476  
477  
478  
479  
480  
481  
482  
483  
484  
485  
486  
487  
488  
489  
490  
491  
492  
493  
494  
495  
496  
497  
498  
499  
500  
501  
502  
503  
504  
505  
506  
507  
508  
509  
510  
511  
512  
513  
514  
515  
516  
517  
518  
519  
520  
521  
522  
523  
524  
525  
526  
527  
528  
529  
530  
531  
532  
533  
534  
535  
536  
537  
538  
539  
540  
541  
542  
543  
544  
545  
546  
547  
548  
549  
550  
551  
552  
553  
554  
555  
556  
557  
558  
559  
560  
561  
562  
563  
564  
565  
566  
567  
568  
569  
570  
571  
572  
573  
574  
575  
576  
577  
578  
579  
580  
581  
582  
583  
584  
585  
586  
587  
588  
589  
590  
591  
592  
593  
594  
595  
596  
597  
598  
599  
600  
601  
602  
603  
604  
605  
606  
607  
608  
609  
610  
611  
612  
613  
614  
615  
616  
617  
618  
619  
620  
621  
622  
623  
624  
625  
626  
627  
628  
629  
630  
631  
632  
633  
634  
635  
636  
637  
638  
639  
640  
641  
642  
643  
644  
645  
646  
647  
648  
649  
650  
651  
652  
653  
654  
655  
656  
657  
658  
659  
660  
661  
662  
663  
664  
665  
666  
667  
668  
669  
670  
671  
672  
673  
674  
675  
676  
677  
678  
679  
680  
681  
682  
683  
684  
685  
686  
687  
688  
689  
690  
691  
692  
693  
694  
695  
696  
697  
698  
699  
700  
701  
702  
703  
704  
705  
706  
707  
708  
709  
710  
711  
712  
713  
714  
715  
716  
717  
718  
719  
720  
721  
722  
723  
724  
725  
726  
727  
728  
729  
730  
731  
732  
733  
734  
735  
736  
737  
738  
739  
740  
741  
742  
743  
744  
745  
746  
747  
748  
749  
750  
751  
752  
753  
754  
755  
756  
757  
758  
759  
760  
761  
762  
763  
764  
765  
766  
767  
768  
769  
770  
771  
772  
773  
774  
775  
776  
777  
778  
779  
780  
781  
782  
783  
784  
785  
786  
787  
788  
789  
790  
791  
792  
793  
794  
795  
796  
797  
798  
799  
800  
801  
802  
803  
804  
805  
806  
807  
808  
809  
810  
811  
812  
813  
814  
815  
816  
817  
818  
819  
820  
821  
822  
823  
824  
825  
826  
827  
828  
829  
830  
831  
832  
833  
834  
835  
836  
837  
838  
839  
840  
841  
842  
843  
844  
845  
846  
847  
848  
849  
850  
851  
852  
853  
854  
855  
856  
857  
858  
859  
860  
861  
862  
863  
864  
865  
866  
867  
868  
869  
870  
871  
872  
873  
874  
875  
876  
877  
878  
879  
880  
881  
882  
883  
884  
885  
886  
887  
888  
889  
890  
891  
892  
893  
894  
895  
896  
897  
898  
899  
900  
901  
902  
903  
904  
905  
906  
907  
908  
909  
910  
911  
912  
913  
914  
915  
916  
917  
918  
919  
920  
921  
922  
923  
924  
925  
926  
927  
928  
929  
930  
931  
932  
933  
934  
935  
936  
937  
938  
939  
940  
941  
942  
943  
944  
945  
946  
947  
948  
949  
950  
951  
952  
953  
954  
955  
956  
957  
958  
959  
960  
961  
962  
963  
964  
965  
966  
967  
968  
969  
970  
971  
972  
973  
974  
975  
976  
977  
978  
979  
980  
981  
982  
983  
984  
985  
986  
987  
988  
989  
990  
991  
992  
993  
994  
995  
996  
997  
998  
999  
1000

18

1  
2  
3 knowledge translation with stakeholders, which may be valuable but also depends on  
4 ideological match.  
5

### 6 7 ***Recommendations for research*** 8

9  
10 It is important that health research increasingly focuses on real-world contexts to  
11 supplement more idealised studies.<sup>5</sup> Health research that does not consider political and  
12 cultural factors may lack relevance and generalisability,<sup>41</sup> especially research into the social  
13 determinants of health. Further research into the globalisation political exposure theme may  
14 help elucidate the evidence base in this area, and potentially distinguish different influences  
15 that may explain why globalisation seems to be able to be associated both positively and  
16 negatively with population health across health outcomes.  
17  
18  
19  
20  
21  
22  
23

### 24 25 ***Implications for policy and practice*** 26

27  
28 Clinicians and decision makers should be aware of the context in which they work,  
29 and the political influences on medicine and health outcomes. They should seek to find ways  
30 to increase the use of evidence in decisions impacting on health. Ideas such as ‘health in all  
31 policies’<sup>42</sup> are worthwhile, but only if they are genuinely put into action and not seen as a ‘tick  
32 box’ exercise.  
33  
34  
35  
36  
37  
38

### 39 40 ***Conclusion*** 41

42 In conclusion, we present a systematic review of 176 studies that demonstrates that  
43 politics is an important determinant of population health outcomes, and one with which the  
44 academic and clinical population health community should engage more for the benefit of  
45 the health of our populations.  
46  
47  
48  
49

### 50 51 **FOOTNOTES** 52

53  
54 **Contributors:** MB was the project director and project manager. The study was  
55 conceptualised by MB with input from MT and BH. Searches were conducted by MB. Study  
56 selection, data extraction and quality assessment were conducted by MB with proportionate  
57  
58  
59



second review from BH. Data interpretation was led by MB with input from MT and BH. MB wrote the first draft of the paper. MT and BH commented on the draft manuscript and thereby contributed important revisions. All tables, figures and supplementary files were made by MB. All authors approved the submission. MB is the guarantor.

**Funding:** This research received no specific grant from any funding agency in the public, commercial or not-for-profit sectors.

**Competing interests:** The authors have personal views and/or memberships on the political left that we do not consider conflict with the vision of public health. MB is a member of the Labour Party (United Kingdom), MT is a member of the Scottish National Party (SNP, a centre-left pro-independence party that forms the devolved government of Scotland) and BH is not a member of any party. This work was not done on behalf of any political party and is not endorsed, influenced or supported in any way by the parties of which authors are members. MB is a social democrat/liberal socialist. MT is a democratic socialist and supports Scottish independence. BH is a democratic socialist. The authors engage in appropriate activities to promote public health and social justice. We have no financial conflicts of interest.

**Ethics approval:** No ethics approval was required for this systematic review of published literature.

**Declaration:** All views presented in this article are the authors' own, and not necessarily those of their institutions nor bodies that fund their other research projects.

**Data sharing statement:** No further data are available.

## REFERENCES

1. McLean I, McMillan A. Oxford concise dictionary of politics. Oxford: Oxford University Press; 2003.
2. Cartledge P. Democracy: a life. Oxford: Oxford University Press; 2015.
3. Gauchet M. Right and left. In: Nora P, Kritzman LD, editors. Realms of memory: conflicts and divisions. New York: Columbia University Press; 1997.
4. Mackenbach JP. Politics is nothing but medicine at a larger scale: reflections on public health's biggest idea. *J Epidemiol Community Health* 2008; 63: 181-4.
5. Barnish MS, Turner S. The value of pragmatic and observational studies in health care and public health. *Pragmat Obs Res* 2017; 8: 49-55.
6. Rowlingson K. Does income inequality cause health and social problems? York: Joseph Rowntree Foundation; 2011.
7. Marmot M. The Marmot Review: Fair Society, Healthy Lives. London: The Marmot Review; 2010.
8. Wilkinson R, Pickett K. The spirit level: why equality is better for everyone. London: Penguin; 2010.
9. Ferrie JE. Evidence and policy: mind the gap. *Int J Epidemiol* 2015; 44: 1-7.
10. Reijneveld SA. The return of community-based health and social care to local government: governance as a public health challenge. *Eur J Public Health* 2017; 27: 1.
11. Scott-Samuel A, Bambra C, Collins C, et al. The impact of Thatcherism on health and wellbeing in Britain. *Int J Health Serv* 2014; 44: 53-71.
12. Watkins J, Wulaningsih W, Da Zhou C, et al. Effects of health and social care spending constraints on mortality in England: a time trend analysis. *BMJ Open* 2017; 7: e017722.

13. Hiam L, Dorling D, Harrison D, et al. What caused the spike in mortality in England and Wales in January 2015? *J R Soc Med* 2017; 110: 131-7.
14. Muntaner C, Borrell C, Ng E, et al. Politics, welfare regimes, and population health: controversies and evidence. *Sociol Health Illn* 2011; 33: 946-64.
15. Dahl RA. *Polyarchy: participation and opposition*. New Haven: Yale University Press; 1971.
16. European Public Health Association. Who we are. Available at: <https://eupha.org/who-we-are> [Accessed 24 February 2018]
17. Moher D, Liberati A, Tetzlaff J, et al. Preferred reporting items for systematic reviews and meta-analyses: the PRISMA statement. *BMJ* 2009; 339: b2535.
18. Daley DJ, Myint PK, Gray RJ, et al. Systematic review on factors associated with medication non-adherence in Parkinson's disease. *Parkinsonism Relat Disord* 2012; 18: 1053-61.
19. Barnish MS, Barnish J. High-heeled shoes and musculoskeletal injuries: a narrative systematic review. *BMJ Open* 2016; 6: e010053.
20. Barnish MS, Whibley D, Horton SMC, et al. Roles of cognitive status and intelligibility in everyday communication in people with Parkinson's disease: a systematic review. *J Parkinsons Dis* 2016; 6: 453-62.
21. Kildal N, Kuhnle S. The Nordic welfare model and the idea of universalism. In: Kildal N, Kuhnle S, editors. *Normative foundations of the welfare state: the Nordic experience*. London: Routledge; 2006, pp.13-33.
22. Marshall MG, Jagers K. *Polity IV project: political regime characteristics and transitions*. Severn, MD: Center for Systemic Peace; 2006.
23. Figge L, Martens P. Globalisation continues: the Maastricht Globalization Index revisited and updated. *Globalizations* 2014; 11: 875-93.
24. Dreyer A. Does globalization affect growth? Evidence from a new index of globalization. *Appl Econom* 2006; 38: 1091-110.
25. Uman LS. Systematic reviews and meta-analyses. *J Can Acad Child Adolesc Psychiatry* 2011; 20: 57-59.
26. Jüni P, Holenstein F, Sterne J, et al. Direction and impact of language bias in meta-analyses of controlled trials. *Int J Epidemiol* 2002; 31: 115-23.
27. Goldfarb M. Liberal? Are we talking about the same thing? *BBC News*, 20 July 2010.
28. Thorpe A. *A history of the British Labour Party*. Basingstoke: Palgrave Macmillan; 2008.
29. Scott-Samuel A, Bambra C. A week is a long time in politics: the health implications of Jeremy Corbyn's UK Labour Party leadership victory. *Int J Health Serv* 2016; 46: 141-48.
30. Barnish M, Morgan HM, Barnish J. The 2016 HIGH Heels: Health effects And psychosexual Benefits (HIGH HABITS) study: systematic review of reviews and additional primary studies. *BMC Public Health* 2017; 18: 37.
31. Office of the Premier. B.C. bans mandatory high heels in the workplace. Victoria, British Columbia, 7 April 2017.
32. Concato J, Shah N, Horwitz RI. Randomized, controlled trials, observational studies, and the hierarchy of research designs. *N Engl J Med* 2000; 342:1887-92.
33. Hill AB. The environment and disease: association or causation? *Proceed R Soc Med* 1965; 58: 295-300.
34. Bergqvist K, Åberg Yngwe M, Lundberg O. Understanding the role of welfare state characteristics for health and inequalities – an analytical review. *BMC Public Health* 2013; 13: 1234.
35. Horton R. Offline: Medicine and Marx. *Lancet* 2017; 390: 2026.
36. Capewell S, Cairney P, Clarke A. Head to head: should action take priority over further research on public health? *BMJ* 2018; 360: k292.
37. Smith KE, Stewart EA. Academic advocacy in public health: disciplinary 'duty' or political 'propaganda'? *Soc Sci Med* 2017; 189: 35-43.

- 1
- 2
- 3 38. Kapilashrami A, Smith KE, Fustukian S, et al. Social movements and public health
- 4 advocacy in action: the UK people's health movement. *J Public Health (Oxf)* 2016;
- 5 38: 413-6
- 6 39. Chauvin JB. Advocacy: the silence of Europe's public health associations is
- 7 deafening. *Eur J Public Health* 2016; 26: 2.
- 8 40. Schafer P. Community-academic partnerships and social change. In O'Campo P,
- 9 Dunn JR, editors. *Rethinking social epidemiology: towards a science of change*.
- 10 Dordrecht: Springer Netherlands, 2011; pp. 285-304.
- 11 41. Levecque K, van Rossem R, de Boyser K, et al. Economic hardship and depression
- 12 across the life course: the impact of welfare state regimes. *J Health Soc Behav* 2011;
- 13 52: 262-76.
- 14 42. Ollilla E. Health in all policies: from rhetoric to action. *Scand J Public Health* 2011; 39
- 15 (Suppl 6): 11-8.
- 16
- 17
- 18
- 19
- 20
- 21
- 22
- 23
- 24
- 25
- 26
- 27
- 28
- 29
- 30
- 31
- 32
- 33
- 34
- 35
- 36
- 37
- 38
- 39
- 40
- 41
- 42
- 43
- 44
- 45
- 46
- 47
- 48
- 49
- 50
- 51
- 52
- 53
- 54
- 55
- 56
- 57
- 58
- 59
- 60

## TABLES

**Table 1. Conceptual search strategy**

((democracy OR autocracy OR welfare regime OR welfare state OR welfare capitalism OR politics OR political tradition OR internationality OR globalization) AND (health OR health services OR population health OR public health OR health economics OR health expenditure))

**Table 2. Definitions of political exposure variables**

| Exposure variable   | Definition                                                                                                                                                                                        |
|---------------------|---------------------------------------------------------------------------------------------------------------------------------------------------------------------------------------------------|
| Welfare state       | “if the analysis included welfare regimes or welfare state indicators (e.g. universal health coverage), but not measures of political ideology (e.g. along the left-right dimension)”             |
| Political tradition | “if the study included variables referring to the left-right political dimension (e.g. social democratic / egalitarian/ left vs. liberal / conservative / right political parties in government)” |
| Democracy           | “if the hypotheses tested involved democratic institutions or political rights”                                                                                                                   |
| Globalisation       | “if the article examined how high, middle, and/ or low countries are integrated through global networks of trade, foreign investment, and multinational corporations”                             |

Source of definitions: Muntaner C, Borrell C, Ng E, et al. Politics, welfare regimes, and population health: controversies and evidence. *Sociol Health Illn* 2011; 33: 946-64.

**Table 3. Overview of overall result classification by political exposure and health outcome**

|                         | Welfare state |   |   | Political tradition |   |   | Democracy |   |   | Globalisation |   |   |
|-------------------------|---------------|---|---|---------------------|---|---|-----------|---|---|---------------|---|---|
|                         | P             | N | I | P                   | N | I | P         | N | I | P             | N | I |
| Birth weight            | 4             | 0 | 0 | 2                   | 0 | 0 | 0         | 0 | 0 | 0             | 0 | 0 |
| Cancer                  | 1             | 0 | 0 | 0                   | 0 | 0 | 0         | 0 | 0 | 0             | 1 | 0 |
| Cerebrovascular disease | 0             | 0 | 0 | 0                   | 0 | 0 | 0         | 0 | 0 | 0             | 1 | 0 |
| Child mortality         | 13            | 0 | 0 | 3                   | 0 | 0 | 5         | 0 | 5 | 2             | 2 | 2 |
| Child wellbeing         | 1             | 0 | 0 | 0                   | 0 | 0 | 0         | 0 | 0 | 0             | 0 | 1 |

|                                        |    |   |    |   |   |   |    |   |   |   |   |   |
|----------------------------------------|----|---|----|---|---|---|----|---|---|---|---|---|
| Chronic conditions                     | 5  | 1 | 2  | 1 | 0 | 0 | 0  | 0 | 0 | 0 | 0 | 0 |
| Diabetes                               | 0  | 0 | 0  | 0 | 0 | 0 | 0  | 0 | 0 | 0 | 1 | 0 |
| Fertility and reproductive health      | 1  | 0 | 0  | 0 | 0 | 0 | 2  | 0 | 1 | 0 | 0 | 0 |
| General health                         | 24 | 0 | 11 | 4 | 0 | 0 | 4  | 0 | 0 | 1 | 0 | 0 |
| Health behaviours                      | 1  | 0 | 0  | 0 | 0 | 0 | 0  | 0 | 0 | 0 | 0 | 0 |
| Health care burden/need                | 3  | 0 | 0  | 0 | 0 | 0 | 0  | 0 | 0 | 0 | 0 | 0 |
| Heart disease                          | 0  | 0 | 0  | 0 | 0 | 0 | 0  | 0 | 0 | 0 | 1 | 0 |
| Health inequalities*                   | 11 | 0 | 2  | 2 | 0 | 0 | 0  | 0 | 0 | 0 | 0 | 0 |
| HIV/AIDS                               | 1  | 0 | 0  | 0 | 0 | 0 | 1  | 0 | 0 | 0 | 1 | 0 |
| Homicide and suicide                   | 0  | 0 | 1  | 0 | 0 | 0 | 0  | 0 | 0 | 0 | 1 | 0 |
| Immunisation/vaccination rates         | 0  | 0 | 0  | 0 | 0 | 0 | 0  | 1 | 0 | 0 | 1 | 0 |
| Implementation of effect health policy | 0  | 0 | 0  | 0 | 0 | 1 | 1  | 0 | 0 | 0 | 0 | 0 |
| Infant mortality                       | 16 | 0 | 2  | 8 | 0 | 0 | 15 | 1 | 4 | 4 | 3 | 3 |
| Life expectancy/adult mortality        | 21 | 2 | 5  | 8 | 0 | 1 | 16 | 1 | 3 | 4 | 1 | 1 |
| Maternal health                        | 0  | 1 | 0  | 0 | 0 | 0 | 0  | 0 | 0 | 0 | 0 | 0 |
| Mental health                          | 9  | 0 | 1  | 0 | 0 | 0 | 1  | 0 | 0 | 0 | 0 | 0 |
| Nutrition, overweight and obesity      | 0  | 0 | 0  | 0 | 0 | 0 | 1  | 0 | 2 | 0 | 5 | 1 |
| Oral health                            | 2  | 0 | 0  | 0 | 0 | 0 | 0  | 0 | 0 | 0 | 0 | 0 |
| Physical activity/health               | 1  | 0 | 0  | 2 | 0 | 0 | 1  | 0 | 0 | 0 | 0 | 0 |
| Pneumonia                              | 0  | 0 | 0  | 0 | 0 | 0 | 0  | 0 | 0 | 0 | 1 | 0 |
| Smoking                                | 0  | 0 | 1  | 1 | 0 | 1 | 0  | 0 | 0 | 0 | 1 | 0 |
| Tuberculosis                           | 2  | 0 | 0  | 0 | 0 | 0 | 1  | 0 | 0 | 0 | 0 | 2 |
| Water pollution                        | 0  | 0 | 0  | 0 | 0 | 0 | 0  | 0 | 0 | 0 | 2 | 0 |
| Wellbeing of the unemployed            | 1  | 0 | 1  | 0 | 0 | 0 | 0  | 0 | 0 | 0 | 0 | 0 |

Columns denote political exposure variables; rows denote health outcome variables; P = Positive, N = Negative, I = Inconclusive, \* this is additionally indirectly measured by many of the other outcomes

## FIGURE LEGENDS

**Figure 1.** Accumulation of evidence on the political determinants of population health over time.

**Figure 2.** PRISMA 2009 flow diagram.

1  
2  
3  
4  
5  
6  
7  
8  
9  
10  
11  
12  
13  
14  
15  
16  
17  
18  
19  
20  
21  
22  
23  
24  
25  
26  
27  
28  
29  
30  
31  
32  
33  
34  
35  
36  
37  
38  
39  
40  
41  
42  
43  
44  
45  
46  
47  
48  
49  
50  
51  
52  
53  
54  
55  
56  
57  
58  
59  
60



Accumulation of evidence on the political determinants of population health over time.

89x51mm (300 x 300 DPI)

Review only

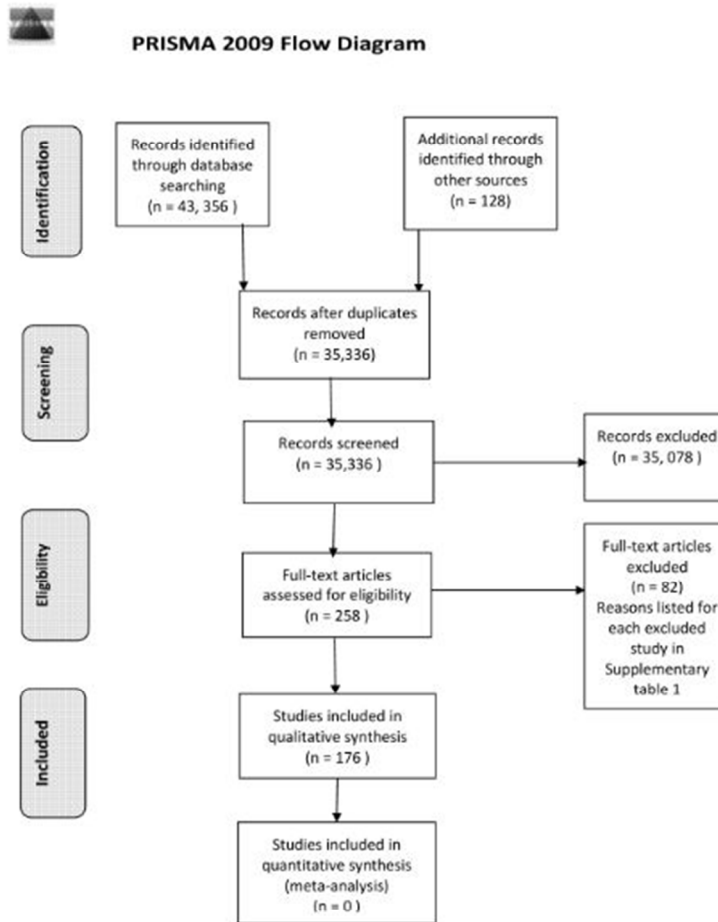

From: Moher D, Liberati A, Tetzlaff J, Altman DG, The PRISMA Group (2009). Preferred Reporting Items for Systematic Reviews and Meta-Analyses: The PRISMA Statement. *PLoS Med* 6(7): e1000097. doi:10.1371/journal.pmed1000097

For more information, visit [www.prisma-statement.org](http://www.prisma-statement.org).

PRISMA 2009 flow diagram.

48x63mm (300 x 300 DPI)

**Supplementary file 1. Devolution and health systems: examples of the differences in health provision between Scotland and England**

| <b>Scotland</b>                                                                                                      | <b>England</b>                              |
|----------------------------------------------------------------------------------------------------------------------|---------------------------------------------|
| <b>Free dental checks at 6-monthly intervals (although there is a charge for treatment)</b>                          | <b>Dental check costs £20.60</b>            |
| <b>Free NHS prescriptions</b>                                                                                        | <b>Prescription costs £8.60</b>             |
| <b>Free NHS eye tests</b>                                                                                            | <b>Commercial eye tests</b>                 |
| <b>Free personal and nursing care upon assessed need</b>                                                             | <b>Commercial care</b>                      |
| <b>Public health is NHS-run</b>                                                                                      | <b>Public health is local authority-run</b> |
| <b>Offers a free baby box scheme, supplying parents of newborn children with around 40 different essential items</b> | <b>No baby box scheme</b>                   |
| <b>Minimum alcohol unit pricing (implementation date 1 May 2018)</b>                                                 | <b>No minimum alcohol unit pricing</b>      |

All information correct at time of writing. Certain services that are chargeable in England are offered free of charge to those on certain state benefits, but are not universally free.

Table adapted from a slide from the following conference presentation by the lead author of this manuscript Dr Max Barnish: "Barnish M. Health policy and the politics of being an early career researcher. Invited oral presentation, Early Career Researchers Workshop, Society for Social Medicine Annual Scientific Meeting, Manchester, UK, 2017". The copyright to this slide is held by Dr Barnish.



## Supplementary file 2. Full MEDLINE search strategy

Platform: OVID

Version: Ovid MEDLINE(R) In-Process & Other Non-Indexed Citations and Ovid MEDLINE(R) 1946 to Present

Notes:

1. .mp indicates a keyword
2. In capitals followed by / indicates a MeSH term
3. exp indicates a MeSH term is exploded to encompass all subcategories, this was done by default

Search string:

(democracy.mp OR democratic.mp OR exp DEMOCRACY/ OR autocracy.mp OR autocratic.mp OR "welfare regime".mp OR exp SOCIAL WELFARE/ OR "welfare state".mp OR "welfare capitalism".mp OR politics.mp OR political.mp OR exp POLITICS/ OR "political tradition".mp OR globalisation.mp OR globalization.mp OR internationality.mp OR exp INTERNATIONALITY/)

AND

(health.mp OR exp HEALTH/ OR "health services".mp OR exp HEALTH SERVICES/ OR "population health".mp OR exp POPULATION HEALTH/ OR "public health".mp OR exp PUBLIC HEALTH/ OR "health economic".mp OR "health economics.mp" OR "health expenditure".mp OR "health expenditures.mp" OR exp HEALTH EXPENDITURES/ )

Limits: English language

**Supplementary file 3. List of all publications included in the review**

1. Ades F, Senterre C, de Azambuja E, et al. Discrepancies in cancer incidence and mortality and its relationship to health expenditure in the 27 European Union member states. *Ann Oncol* 2013; 24: 2897-902.
2. Adeyi O, Chellaraj G, Goldstein E, et al. Health status during the transition in Central and Eastern Europe: Development in reverse? *Health Policy Plan* 1997; 12: 132-45.
3. Akinci F, Hamidi S, Suvankulov F, et al. Examining the impact of health care expenditures on health outcomes in the Middle East and N. Africa. *J Health Care Finance* 2014; 41(1): 1-23.
4. Alvarez-Dardet C, Franco-Giraldo A. Democratisation and health after the fall of the Wall. *J Epidemiol Community Health* 2006; 60: 669-71.
5. Avendano M, Juerges H, Mackenbach JP. Educational level and changes in health across Europe: longitudinal results from SHARE. *J Eur Soc Policy* 2009; 19: 301-16.
6. Bambra C, Lunau T, van der Wel KA, et al. Work, health, and welfare: the association between working conditions, welfare states, and self-reported general health in Europe. *Int J Health Serv* 2014; 44: 113-36.
7. Bambra C, Pope D, Swami V, et al. Gender, health inequalities and welfare state regimes: a cross-national study of 13 European countries. *J Epidemiol Community Health* 2009; 63: 38-44.
8. Bambra C, Eikemo TA. Welfare state regimes, unemployment and health: a comparative study of the relationship between unemployment and self-reported health in 23 European countries. *J Epidemiol Community Health* 2009; 63: 92-8.
9. Bambra C. Health status and the worlds of welfare. *Soc Policy Soc* 2006; 5: 53-62.
10. Bambra C. Cash versus services: 'worlds of welfare' and the decommodification of cash benefits and health care services. *J Soc Policy* 2005; 34: 195-213.
11. Batniji R, Khatib L, Cammett M, et al. Governance and health in the Arab world. *Lancet* 2014; 383: 343-55.
12. Baum MA, Lake DA. The political economy of growth: democracy and human capital, *Am J Pol Sci* 2003; 47: 333-47.
13. Bentley RJ, Pevalin D, Baker E, et al. Housing affordability, tenure and mental health in Australia and the United Kingdom: a comparative panel analysis. *Housing Studies* 2016; 31: 208-22.
14. Bergh A, Nilsson T. Good for living? On the relationship between globalization and life expectancy. *World Dev* 2010; 38: 1191-1203.
15. Besley T, Kudamatsu M. Health and democracy. *Am Econ Rev* 2006; 96: 313-18.
16. Bosdriez JR, Willemsen MC, Stronks K, et al. Tobacco control policy development in the European Union: do political factors matter? *Eur J Public Health* 2015; 25: 190-4.
17. Borrell C, Espelt A, Rodriguez-Sanz M, et al. Analysing differences in the magnitude of socioeconomic inequalities in self-perceived health by countries of different political tradition in Europe. *Int J Health Serv* 2009; 39: 321-41.
18. Bozorgmehr K, Sebastian M. 2014. Trade liberalization and tuberculosis incidence: a longitudinal multi-level analysis in 22 high burden countries between 1990 and 2010. *Health Policy Plan* 2014; 29: 328-51.
19. Bradley EH, Elkins BR, Herrin J, et al. Health and social services expenditures: associations with health outcomes. *BMJ Qual Saf* 2011; 20: 826-831.
20. Brandt M, Hank K. Scars that will not disappear: long-term associations between early and later life unemployment under different welfare regimes. *J Soc Policy* 2014; 43: 727-43.

21. Bremberg SG. The rate of country-level improvements of the infant mortality rate is mainly determined by previous history. *Eur J Public Health* 2016; 26: 597-601.
22. Burroway R. Democracy and child health in developing countries. *Int J Comparat Sociol* 2016; 57: 338-64.
23. Burstrom B, Whitehead M, Clayton S, et al. Health inequalities between lone and couple mothers and policy under different welfare regimes – the example of Italy, Sweden and Britain. *Soc Sci Med* 2010; 70: 912–20.
24. Cereseto S, Waitzkin, H. Economic-development, political-economic system, and the physical quality-of-life. *Am J Public Health* 1986; 76: 661–66.
25. Chuang Y-C, Sung P-W, Chao HJ, et al. A longitudinal ecological study of the influences of political, economic, and health services characteristics on under-five mortality in less-developed countries. *Health Place* 2013; 23: 111-21.
26. Chuang K-Y, Sung P-W, Chang C-J, et al. Political and economic characteristics as moderators of the relationship between health services and infant mortality in less-developed countries. *J Epidemiol Community Health* 2013; 67: 1006-12.
27. Chung H, Muntaner C. Welfare state matters: a typological multilevel analysis of wealthy countries. *Health Policy* 2007; 80:328–39.
28. Chung H, Muntaner C. Political and welfare state determinants of infant and child health indicators: an analysis of wealthy countries. *Soc Sci Med* 2006; 63: 829–42.
29. Conley D, Springer KW. Welfare state and infant mortality. *Am J Sociol* 2001; 107: 768–807.
30. Copeland A, Bambra C, Nylén L, et al. All in it together? The effects of recession on population health and health inequalities in England and Sweden, 1991-2010. *Int J Health Serv* 2015; 45: 3-24.
31. Correa H, Namkoong K. Determinants and effects of health policy. *Journal Policy Model* 1992; 14: 41–63.
32. Corsi DJ, Subramanian SV. Association between coverage of maternal and child health interventions, and under-5 mortality: a repeated cross-sectional analysis of 35 sub-Saharan African countries. *Glob Health Action* 2014; 7: 24765.
33. Costa-Font J, Mas N. ‘Globesity’? The effects of globalization on obesity and caloric intake. *Food Policy* 2016; 64: 121-32.
34. Craveiro D. Ties and inequalities in later life: welfare state regime and the role of social networks in health inequalities in later life in Europe. *Eur Soc* 2017; 19: 268-71.
35. Cross P, Edwards RT, Opondo M, et al. Does farm worker health vary between localised and globalised food supply systems? *Environ Int* 2009; 35: 1004-14.
36. De Vogli RD, Kouvonen A, Elovainio M, et al. Economic globalization, inequality and body-mass index: a cross-national analysis of 127 countries. *Crit Public Health* 2014; 24: 7-21.
37. Dahl E, van der Wel KA. Educational inequalities in health in European welfare states: a social expenditure approach. *Soc Sci Med* 2013; 81:60–9.
38. Dahl E, Fritzell J, Lahelma E, et al. Welfare state regimes and health inequalities. In Siegrist J, Marmot, M, editors. *Social Inequalities in Health: New Evidence and Policy Implications*. Oxford: Oxford University Press; 2006.
39. Deeming C, Hayes D. Worlds of welfare capitalism and wellbeing: a multilevel analysis. *J Soc Policy* 2012; 41: 811-29.
40. Devaux M. Income-related inequalities and inequities in health care services utilisation in 18 selected OECD countries. *Eur J Health Econom* 2015; 16: 21-33.
41. Dietrich S, Bernhard M. State or regime? The impact of institutions on welfare outcomes. *Eur J Develop Res* 2015; 28: 252-69.

42. Doherty AM, Kelly BD. Social and psychological correlates of happiness in 17 European countries. *Irish J Psychol Med* 2010; 27(3): 130-4.
43. Dragano N, Siegrist J, Wahrendorf M. Welfare regimes, labour policies and unhealthy psychosocial working conditions: a comparative study with 9917 older employees from 12 European countries. *J Epidemiol Community Health* 2010; 65: 793-9.
44. Dujardin C, Farfan-Portet M-I, Mitchell R, et al. Does country influence the health burden of informal care? An international comparison between Belgium and Great Britain. *Soc Sci Med* 2011; 73: 1123-32.
45. Eikemo TA, Bambra C, Judge K, et al. Welfare state regimes and differences in self-perceived health in Europe: a multilevel analysis. *Soc Sci Med* 2008; 66: 2281-95.
46. Eikemo TA, Huisman M, Bambra C, et al. Health inequalities according to educational level in different welfare regimes: a comparison of 23 European countries. *Sociol Health Illn* 2008; 30: 565-82.
47. Elgar FJ, Aitken N. Income inequality, trust and homicide in 33 countries. *Eur J Public Health* 2011; 21: 241-6.
48. Elo J, Daponte A, Navarro V. Health indicators and the organization of healthcare systems in Western Europe. *Am J Public Health* 1995; 85: 1397-1401.
49. Engster D, Stensöta HO. Do family policy regimes matter for children's well-being? *Soc Polit* 2011, 18(1):82-124.
50. Esmaeli A, Mansouri S, Moshavash M. Income inequality and population health in Islamic countries. *Public Health* 2011; 125: 577-84.
51. Espelt A, Borrell C, Rodriguez-Sanz, M, et al. Inequalities in health by social class dimensions in European countries of different political traditions. *Int J Epidemiol* 2008; 37: 1095-1105.
52. Esser I, Palme J. Do public pensions matter for health and wellbeing among retired persons? Basic and income security pensions across 13 Western European countries. *Int J Soc Welfare* 2010; 19: S103-20.
53. Estimé MS, Lutz B, Strobel F. Trade as a structural driver of dietary risk factors for noncommunicable diseases in the Pacific: an analysis of household income and expenditure survey data. *Globalization Health* 2014; 10: 48.
54. Fan VY, Faioso Le'au R. Insights in public health: a tale of two polities: health in Independent and American Samoa. *Hawai'i J Med Public Health* 2015; 74: 179-84.
55. Farfan-Portet M, Popham F, Mitchell R, et al. Caring, employment and health among adults of working age: evidence from Britain and Belgium. *Eur J Public Health* 2010; 20: 52-7.
56. Fayissa B. The determinants of infant and child mortality in developing countries: the case of Sub-Saharan Africa. *Rev Black Polit Econ* 2001; 29: 83-100.
57. Foubert J, Levecque K, van Rossem R, et al. Do welfare regimes influence the association between disability and self-perceived health? A multilevel analysis of 57 countries. *Soc Sci Med* 2014; 117: 10-7.
58. Franco A, Alvarez-Dardet C, Ruiz MT. Effect of democracy on health: ecological study. *BMJ* 2004; 329: 1421-23.
59. Frey RS, Al-Roumi A. Political democracy and the physical quality of life: the cross-national evidence. *Soc Indic Res* 1999; 47: 73-97.
60. Fritzell S, Vannoni F, Whitehead M, et al. Does non-employment contribute to the health disadvantage among lone mothers in Britain, Italy and Sweden? Synergy effects and the meaning of family policy. *Health Place* 2012; 18: 199-208.
61. Fritzell J, Kangas O, Bacchus Hertzman J, et al. Cross-temporal and cross-national poverty and mortality rates among developed countries. *J Environ Public Health* 2013; 2013: 915490.

62. Fumagalli E, Mentzakis E, Suhrcke M. Do political factors matter in explaining under- and overweight outcomes in developing countries. *J Socioecon* 2013; 46: 48-56.
63. Gauri V, Khaleghian P. Immunization in developing countries: its political and organizational determinants, *World Dev* 2002; 30: 2109–32.
64. Gerring J, Thacker SC. Do neoliberal economic policies kill or save lives? *Bus Polit* 2008; 10: 1-33.
65. Gesthuizen M, Huijts T, Kraaykamp G. Explaining health marginalisation of the lower educated: the role of cross-national variations in health expenditure and labour market conditions. *Sociol Health Illn* 2012, 34:591–607.
66. Ghobarah HA, Huth P, Russett, B. Comparative public health: the political economy of human misery and well-being. *Int Stud Q* 2004; 48: 73–94.
67. Gilligan AM, Skrepnek GH. Determinants of life expectancy in the Eastern Mediterranean Region. *Health Policy Plan* 2015; 30, 624-37.
68. Gizelis T. Wealth alone does not buy health: political capacity, democracy, and the spread of AIDS. *Polit Geogr* 2009; 28: 121–31.
69. Glass J, Andersson MA, Simon RW. Parenthood and happiness: effects of work-family reconciliation policies in 22 OECD countries. *Am J Sociol* 2016; 122, 886-929.
70. Goryakin Y, Lobstein T, James WPT, et al. The impact of economic, political and social globalization on overweight and obesity in the 56 low and middle income countries. *Soc Sci Med* 2015; 133: 67-76.
71. Granados JAT. Politics and health in eight European countries: a comparative study of mortality decline under social democracies and right-wing governments. *Soc Sci Med* 2010; 71: 841-50.
72. Grosse Frie K, Eikemo TA, Knesebeck OvD. Education and self-reported health care seeking behaviour in European welfare regimes: results from the European Social Survey. *Int J Public Health* 2010; 55: 217–20.
73. Guarnizo-Herreño CC, Tsakos G, Sheiham A, et al. Oral health and welfare state regimes: a cross-national analysis of European countries. *Eur J Oral Sci* 2013; 121: 169-75.
74. Harding S, Lenguerrand E, Costa G, et al. Trends in mortality by labour market position around retirement ages in three European countries with different welfare regimes. *Int J Public Health* 2013; 58: 99-108.
75. Hájek O, Grebeníček P, Popesko B, et al. Czech Republic vs EU-27: economic level, health care and population health. *Cent Eur J Public Health* 2012; 20(3): 167-73.
76. Hauck K, Martin S, Smith PC. Priorities for action on the social determinants of health: empirical evidence on the strongest associations with life expectancy in 54 low-income countries, 1990-2012. *Soc Sci Med* 2016; 167: 88-98.
77. Heijink R, Koolman X, Westert GP. Spending more money, saving more lives? The relationship between avoidable mortality and healthcare spending in 14 countries. *Eur J Health Econ* 2013; 14: 527-38.
78. Hoffman R. Socioeconomic inequality in old-age mortality: a comparison of Denmark and the USA. *Soc Sci Med* 2011; 72: 1986-92.
79. Houweling TAJ, Caspar AEK, Looman WN, et al. Determinants of under-5 mortality among the poor and the rich: a cross-national analysis of 43 developing countries. *Int J Epidemiol* 2005; 34: 1257–65.
80. Huijts T, Perkins JM, Subramanian SV. Political regimes, political ideology and self-rated health in Europe: a multilevel analysis. *PLoS One* 2010; 5: e11711.
81. Jolly CM, Namugabo E, Nguyen G, et al. Net food imports and obesity in selected Latin American & Caribbean countries. *Adv Manag Appl Econom* 2013; 3(6); 159-77.

- 1  
2  
3 82. Jorgenson AK. Foreign direct investment and the Environment, the mitigating  
4 influence of Institutional and Civil Society factors, and relationships between  
5 industrial pollution and human health a panel study of less-developed countries.  
6 *Organ Environ* 2009; 22: 135-57.
- 7 83. Jorgenson AK. Political-economic integration, industrial pollution and human health:  
8 a panel study of less-developed countries, 1980-2000. *Int. Sociol* 2009; 24: 115-43.
- 9 84. Karim SA, Eikemo TA, Bambra C. Welfare state regimes and population health:  
10 integrating the East Asian welfare states. *Health Policy* 2010; 94: 45-53.
- 11 85. Kick EL, Nasser R, Davis BL, et al. Militarization and infant-mortality in the third-  
12 world. *J Polit Militar Sociol* 1990; 18: 285-305.
- 13 86. Klenk J, Keil U, Jaensch A, et al. Changes in life expectancy 1950-2010:  
14 contributions from age- and disease-specific mortality in selected countries.  
15 *Population Health Metrics* 2016; 14: 20.
- 16 87. Klomp J, de Haan J. Effects of governance on health: a cross-national analysis of  
17 101 Countries. *Kyklos* 2008; 61: 599-614.
- 18 88. Klomp J, de Haan, J. Is the political system really related to health? *Soc Sci Med*  
19 2009; 69: 36-46.
- 20 89. Krueger PM, Dovel K, Denney JT. Democracy and self-rated health across 67  
21 countries: a multilevel analysis. *Soc Sci Med* 2015; 143: 137.
- 22 90. Kudamatsu M. Has democratization reduced infant mortality in sub-Saharan Africa?  
23 *J Eur Econ Assoc* 2012; 10: 1294-317.
- 24 91. Kouvo A, Räsänen P. Foundations of subjective well-being in turbulent times: a  
25 comparison of four European countries. *Int J Sociol Soc Policy* 2015; 35: 2-17.
- 26 92. Lahelma E, Arber S. Health inequalities among men and women in contrasting  
27 welfare states: Britain and three Nordic countries compared. *Eur J Public Health*  
28 1994; 37: 213-26.
- 29 93. Lake DA, Baum MA. The invisible hand of democracy – political control and the  
30 provision of public services. *Comp Polit Stud* 2001; 34: 587-621.
- 31 94. Lena HF, London B. The political and economic-determinants of health outcomes –  
32 a cross-national analysis. *Int J Health Serv* 1993; 23: 585-602.
- 33 95. Levecque K, van Rossem R, de Boyser K, et al. Economic hardship and depression  
34 across the life course: the impact of welfare state regimes. *J Health Soc Behav*  
35 2011; 52: 262-76.
- 36 96. Levecque K, Van Rossem R. Depression in Europe: does migrant integration have  
37 mental health payoffs? A cross-national comparison of 20 European countries. *Ethn*  
38 *Health* 2015; 20: 49-65.
- 39 97. Levine DI, Rothman D. Does trade affect child health? *J Health Econ* 2006; 25: 538-  
40 54.
- 41 98. Lin R-T, Chen Y-M, Chien L-C, et al. Political and social determinants of life  
42 expectancy in less developed countries: a longitudinal study. *BMC Public Health*  
43 2012; 12: 85
- 44 99. Lin R-T, Chien L-C, Chen Y-M, et al. Governance matters: an ecological association  
45 between governance and child mortality. *Int Health* 2014; 6: 249-57.
- 46 100. London B, Williams BA. National politics, international dependency, and basic  
47 needs provision – a cross-national analysis. *Soc Forces* 1990; 69: 565-84.
- 48 101. López-Casasnovas G, Soley-Bori M. The socioeconomic determinants of  
49 health: economic growth and health in the OECD countries during the last three  
50 decades. *Int J Environ Res Public Health* 2014; 11: 815-29.
- 51 102. Lundberg O, Yngwe MA, Stjerne MK, et al. The role of welfare state principles  
52 and generosity in social policy programmes for public health: an international  
53 comparative study. *Lancet* 2008; 372: 1633-40.
- 54  
55  
56  
57  
58  
59  
60

103. McKinnon B, Harper S, Kaufman JS. Do socioeconomic inequalities in neonatal mortality reflect inequalities in coverage of maternal health services? Evidence from 48 low- and middle-income countries. *Matern Child Health J* 2016; 20: 434-6.
104. Mackenbach JP. Political conditions and life expectancy in Europe, 1990-2008. *Soc Sci Med* 2013; 82: 134-46.
105. Mackenbach JP, Hu Y, Looman CWN. Democratization and life expectancy in Europe, 1960-2008. *Soc Sci Med* 2013; 93: 166-75.
106. Mackenbach JP, McKee M. A comparative analysis of health policy performance in 43 European countries. *Eur J Public Health* 2013; 23: 195-201.
107. Martens P, Akin SM, Maud H, et al. Is globalization healthy: a statistical indicator analysis of the impacts of globalization on health. *Glob. Health* 2010; 6:16.
108. Maynard G. Neoliberal trade and investment policies, the ITGA and youth smoking rates: a cross-national analysis of developing nations. *Sociol Spectr* 2015; 35: 419-41.
109. Maynard G. Health international non-governmental organizations, democracy, and tuberculosis mortality in developing nations: a longitudinal analysis. *Sociol Spectr* 2016; 36: 303-20.
110. Miething A, Lundberg O, Geyer S. Income and health in different welfare contexts: a comparison of Sweden, East and West Germany. *Scand J Public Health* 2013; 41: 260-8.
111. Menon-Johansson MA. Good governance and good health: the role of societal structures in the human immunodeficiency virus pandemic. *BMC Int Health Hum Rights* 2005; 5: 96-111.
112. Milner A, McLure R, Sun J, et al. Globalization and suicide: an empirical investigation in 35 countries over the period 1980-2006. *Health Place* 2011; 17: 996-1003.
113. Minagawa Y. Inequalities in healthy life expectancy in Eastern Europe. *Populat Dev Rev* 2013; 39: 649-71.
114. Moon BE, Dixon WJ. Politics, the state, and basic human-needs – a cross-national-study. *Am J Polit Sci* 1985; 29: 661-94.
115. Moor N, de Graaf PM, Komter A. Family, welfare state generosity and the vulnerability of older adults: a cross-national survey. *J Aging Stud* 2013; 27: 347-57.
116. Moore S, Teixeira AC, Shiell, A. The health of nations in a global context: trade, global stratification, and infant mortality rates. *Soc Sci Med* 2006; 63: 165-78.
117. Mukherjee N, Kriekhaus J. Globalization and human well-being. *Int Polit Sci Rev* 2012; 33(2): 150-70.
118. Muldoon KA, Galway LP, Nakajima M, et al. Health system determinants of infant, child and maternal mortality: a cross-sectional study of UN member countries. *Global Health* 2011; 7:42.
119. Muntaner C, Davis O, Mclsaack K, et al. Retrenched welfare regimes still lessen social class inequalities in health: a longitudinal analysis of the 2003-2010 EU-SILC in 23 European countries. *Int J Health Serv* 2017; 47: 410-31.
120. Muntaner C, Borrell C, Kunst A, et al. Social class inequalities in health: does welfare state regime matter? In Raphael D, Bryant T, Rioux MH, editors. *Staying alive: critical perspectives on health, illness, and health care*. Toronto: Canadian Scholars Press; 2006.
121. Muntaner C, Lynch JW, Hillemeier M, et al. Economic inequality, working-class power, social capital, and cause-specific mortality in wealthy countries. *Int J Health Serv* 2002; 32: 629-56.

122. Navarro V, Muntaner C, Borrell C, et al. Politics and health outcomes. *Lancet* 2006; 368: 1033–37.
123. Navarro V, Borrell C, Benach J, et al. The importance of the political and the social in explaining mortality differentials among the countries of the OECD, 1950–1998. *Int J Health Serv* 2003; 33: 419–94.
124. Navarro V, Shi LY. The political context of social inequalities and health. *Int J Health Serv* 2001; 31: 1–21.
125. Navia P, Zweifel TD. Democracy, dictatorship, and infant mortality revisited. *J Democracy* 2003; 14: 90–103.
126. Nelson K, Fritzell J. Welfare states and population health: the role of minimum income benefits for mortality. *Soc Sci Med* 2014; 112: 63–71.
127. Nordenmark M, Strandh M, Layte R. The impact of unemployment benefit system on the mental well-being of the unemployed in Sweden, Ireland and Great Britain. *Eur Societies* 2006; 8: 83–110.
128. Novignon J, Olakojo SA, Novignon J. The effects of public and private health care expenditure on health status in sub-Saharan Africa: new evidence from panel data analysis. *Health Econ Rev* 2012; 2: 22.
129. Oberlander L, Disdier A-C, Etilé F. Globalisation and national trends in nutrition and health: A grouped fixed-effects approach to intercountry heterogeneity. *Health Econ* 2017; 26: 1146–61.
130. Olafsdottir S. Fundamental causes of health disparities: stratification, the welfare state, and health in the United States and Iceland. *J Health Soc Behav* 2007; 48: 239–253.
131. Olsen KM, Dahl SA. Health differences between European countries. *Soc Sci Med* 2007, 64: 1665–78.
132. Oster E. Routes of infection: exports and HIV incidence in sub-Saharan Africa. *J Eur Econ Assoc* 2012; 10: 1025–58.
133. Ouweneel P. Social security and well-being of the unemployed in 42 nations. *J Happiness Stud* 2002; 3: 167–92.
134. Owen AL, Wu S. Is trade good for your health? *Rev Int Econ* 2007; 15: 660–82.
135. Palència L, Malmusi D, de Moortel D, et al. The influence of gender equality policies on gender inequalities in health in Europe. *Soc Sci Med* 2013; 117: 25–33.
136. Pickett KE, Wilkinson RG. Child wellbeing and income inequality in rich countries: ecological cross sectional study. *BMJ* 2007; 335: 1080.
137. Pillai VK, Gupta R. Cross-national analysis of a model of reproductive health in developing countries. *Soc Sci Res* 2006; 35: 210–27.
138. Pinzón-Flórez CE, Fernández-Niño JA, Ruiz-Rodríguez M, et al et al. Determinants of performance of health systems concerning maternal and child health: a global approach. *PLoS ONE* 2015; 10: e0120747.
139. Platts LG. A prospective analysis of labour market status and self-rated health in the UK and Russia. *Econ Transit* 2015; 23(2): 343–70.
140. Ploubidis GB, Dale C, Grundy E. Later life health in Europe: how important are country level influences? *Eur J Ageing* 2012; 9:5–13.
141. Popham F, Dibben C, Bambra C. Are health inequalities really not the smallest in the Nordic welfare states? A comparison of mortality inequality in 37 countries. *J Epidemiol Community Health* 2013; 67: 412–8.
142. Raphael D, Bryant T. The welfare state as a determinant of women's health: support for women's quality of life in Canada and four comparison nations. *Health Policy* 2004; 68: 63–79.



143. Reeves A, Basu S, McKee M, et al. Social protection and tuberculosis control in 21 European countries, 1995-2012: a cross-national statistical modelling analysis. *Lancet Infect Dis* 2014; 14: 1105-12.
144. Richter M, Rathman K, Nic Gabhainn S, et al. Welfare state regimes, health and health inequalities in adolescence: a multilevel study in 32 countries. *Sociol Health Illn* 2012; 34: 858-79.
145. Ross M. Is democracy good for the poor? *Am J Polit Sci* 2006; 50: 860-74.
146. Rostila M. Social capital and health in European welfare regimes: a multilevel approach. *J Eur Soc Policy* 2007; 17: 223-39.
147. Rovny AE. Welfare state policy determinants of fertility level: a comparative analysis. *J Eur Soc Policy* 2011; 21: 335-47.
148. Rudra N, Haggard S. Globalization, democracy, and effective welfare spending in the developing world. *Comp Polit Stud* 2005; 38: 1015-49.
149. Sacker A, Worts D, McDonough P. Social influences on trajectories of self-rated health: evidence from Britain, Germany, Denmark and the USA. *J Epidemiol Community Health* 2011; 65:130-6.
150. Safaei J. Is democracy good for health? *Int J Health Serv* 2006; 36: 767-86.
151. Sanders AE, Slade GD, John MT, et al. A cross-national comparison of income gradients in oral health quality of life in four welfare states: application of the Korpi and Palme typology. *J Epidemiol Community Health* 2009; 63: 569-74.
152. Sarti S, Alberio M, Terraneo M. Health inequalities and the welfare state in European families. *J Sociol Soc Welfare Needs* 2013; 40: 103-30.
153. Sekine M, Chandola T, Martikainen P, et al. Socioeconomic inequalities in physical and mental functioning of British, Finnish, and Japanese civil servants: role of job demand, control, and work hours. *Soc Sci Med* 2009; 69: 1417-25.
154. Shandra JM, Shandra CL, London B. Do non-governmental organizations impact health? A cross-national analysis of infant mortality. *Int J Comp Sociol* 2010; 51: 137-164.
155. Shandra JM, Nobles J, London B, et al. Dependency, democracy, and infant mortality: a quantitative, cross-national analysis of less developed countries. *Soc Sci Med* 2004; 59: 321-33.
156. Shen C, Williamson JB. Accounting for cross-national differences in infant mortality decline (1965-1991) among less developed countries: effects of women's status, economic dependency, and state strength. *Soc Ind Res* 2001; 53: 257-88.
157. Shen C, Williamson JB. Child mortality, women's status, economic dependency, and state strength: a cross-national study of less developed countries. *Social Forces* 1997; 76: 667-700.
158. Shim J. Social welfare expenditures and infant mortality. *Soc Work Public Health* 2015; 30: 567-77.
159. Stavrova O, Schlösser T, Fetchenhauer D. Are the unemployed equally unhappy all over the world? The role of the social norms to work and welfare state provision in 28 OECD countries. *J Econ Psychol* 2011; 32: 159-71.
160. Stroup MD. Economic freedom, democracy, and the quality of life. *World Dev* 2007; 35: 52-66.
161. Stuckler D, Basu S, McKee M. Budget crises, health, and social welfare programmes. *BMJ* 2010, 340:c3311.
162. Tsai MC. Does political democracy enhance human development in developing countries? A cross-national analysis. *Am J Econ Sociol* 2006; 65: 233-68.

- 1  
2  
3 163. Van der Heuvel M, Hopkins J, Biscaro A, et al. A comparative analysis of  
4 early child health and development services and outcomes in countries with different  
5 redistributive policies. *BMC Public Health* 2013; 13: 1049.
- 6 164. Van der Wel KA, Dahl E, Thielen K. Social inequalities in 'sickness':  
7 European welfare states and non-employment among the chronically ill. *Soc Sci*  
8 *Med* 2011; 73: 1608-17.
- 9 165. Van Tuyckom C. Macro-environmental factors associated with leisure-time  
10 physical activity: a cross-national analysis of EU countries. *Scand J Public Health*  
11 2011; 39: 419-26.
- 12 166. Vahid Shahidi F, Siddiqi A, Muntaner C. Does social policy moderate the  
13 impact of unemployment on health? A multilevel analysis of 23 welfare states. *Eur J*  
14 *Public Health*. *Eur J Public Health* 2016; 26: 1017-22.
- 15 167. Veenhoven R. Well-being in the welfare state. *J Comp Policy Anal* 2000; 2:  
16 91-125.
- 17 168. Veenhoven R, Ouweneel P. Livability of the welfare-state – appreciation-of-  
18 life and length-of-life in nations varying in state-welfare-effort. *Soc Indic Res* 1995;  
19 36: 1-48.
- 20 169. Vöörmann R, Helemäe J. A comparative analysis of gender differences in  
21 self-rated health: is the Baltic Sea a frontier of the East-West health divide in  
22 Europe? *Filosofija-Sociologija* 2013; 24(2): 62-70.
- 23 170. Wejnert B. Effect of global democracy on women's reproductive health:  
24 1970-2005, cross-world analysis. *Marriage Fam Rev* 2008; 41 (3-4): 14-37.
- 25 171. Whitehead M, Burstrom B, Diderichsen, F. Social policies and the pathways  
26 to inequalities in health: a comparative analysis of lone mothers in Britain and  
27 Sweden. *Soc Sci Med* 2000; 50: 255-70.
- 28 172. Witvliet MI, Kunst A, Arah OA, et al. Sick regimes and sick people: a  
29 multilevel investigation of the population health consequences of perceived national  
30 corruption. *Trop Med Internat Health* 2013; 18: 1240-7.
- 31 173. Wu JCL, Chiang TL. Comparing child mortality in Taiwan and selected  
32 industrialized countries. *J Formos Med Assoc.* 2007, 106 (2): 177-180.
- 33 174. York R, Bell SE. Life satisfaction across nations: the effects of women's  
34 political status and public priorities. *Soc Sci Res* 2014; 48: 48-61.
- 35 175. Zambon A, Boyce W, Cois E, et al. Do welfare regimes mediate the effect of  
36 socioeconomic position on health in adolescence? A cross-national comparison in  
37 Europe, North America, and Israel. *Int J Health Serv* 2006; 36: 309-29.
- 38 176. Zweifel TD, Navia P. Democracy, dictatorship, and infant mortality. *J*  
39 *Democracy* 2000; 11: 99-114.
- 40  
41  
42  
43  
44  
45  
46  
47  
48  
49  
50  
51  
52  
53  
54  
55  
56  
57  
58  
59  
60

1  
2  
3  
4  
5  
6  
7  
8  
9  
10  
11  
12  
13  
14  
15  
16  
17  
18  
19  
20  
21  
22  
23  
24  
25  
26  
27  
28  
29  
30  
31  
32  
33  
34  
35  
36  
37  
38  
39  
40  
41  
42  
43  
44  
45  
46  
47  
48  
49  
50  
51  
52  
53  
54  
55  
56  
57  
58  
59  
60

#### Supplementary file 4. List of all publications excluded at full-text screening, with reasons

1. Abbott P, Wallace C. Exploring economic and social transformations in post-Soviet Russia, Ukraine and Belarus. *Eur Societies* 2010; 12: 653-74. No eligible comparisons.
2. Aggarwal S. 2010-2012 global health care reforms and their impact on pricing, access and health outcomes strategy. *Value Health* 2012; 15(7): A291. Abstract only.
3. Aldabe B, Anderson R, Lyly-Yrjänäinen, et al. Contribution of material, occupational, and psychosocial factors in the explanation of social inequalities in health in 28 countries in Europe. *J Epidemiol Community Health* 2011; 65: 1123-31. No eligible exposures.
4. Alsan M, Bloom DE, Canning D. The effect of population health on foreign direct investment inflows to low-and middle-income countries. *World Dev* 2006; 34: 613-30. No eligible comparisons.
5. Alves S. Welfare state changes and outcomes – the cases of Portugal and Denmark from a comparative perspective. *Soc Pol Adm* 2015; 49: 1-23. Study design.
6. Amouzou A, Kozuki N, Gwatkin DR. Where is the gap? The contribution of disparities within developing countries to global inequalities in under-five mortality. *BMC Public Health* 2014; 14: 216. No eligible exposures.
7. Arán-Matero D, Amico P, Arán-Fernandez C, et al. Levels of spending and resource allocation to HIV programs and services in Latin America and the Caribbean. *PLoS ONE* 2011; 6: e22373. No eligible comparisons.
8. Arnold RG, Heyworth J, Sáez AE, et al. The status of water and sanitation among Pacific Rim nations. *Rev Environ Health* 2011; 26: 17-30. No eligible comparisons.
9. Atikeler K, Piniakho O. Pricing and reimbursement policies of Turkey and Ukraine. *Value in Health* 2015; 18(7): A573. Abstract only.
10. Azemar C, Desbordes R. Public governance, health and foreign direct investment in sub-Saharan Africa. *J Afr Econ* 2009; 18: 667-709. No eligible comparisons.
11. Balaj M, McNamara CL, Eikemo TA, et al. The social determinants of inequalities in self-reported health in Europe: findings from the European social survey (2014) special module on the social determinants of health. *Eur J Public Health* 2017; 27: 107-14. No eligible comparisons.
12. Basch CH, Samuel L, Ethan D. Obesity, diabetes and heart disease: effects of globalization on population health, preventive efforts, and the importance of social change. *Int J Health Promot Educ* 2013; 51: 185-97. Study design.
13. Basu S, McKee M, Galea G, et al. Relationship of soft drink consumption to global overweight, obesity, and diabetes: a cross-national analysis of 75 countries. *Am J Public Health* 2013; 103: 2071-7. No eligible exposures.
14. Bayati M, Akbarian R, Kavosi Z. Determinants of life expectancy in eastern mediterranean region: a health production function. *Int J Health Policy Manag* 2013; 1: 57-61. No relevant comparisons.
15. Beckfield J, Olafsdottir S, Bakhtiari E. Health inequalities in global context. *Am Behav Sci* 2013; 57: 1014-39. No eligible comparisons.

16. Bernard S, Hotte L, Winer SL. Democracy, inequality and the environment when citizens can mitigate health consequences of pollution privately or act collectively. *Eur J Polit Econ* 2014; 34: 142-56. Study design.
17. Borrell C, Morrison J, Burstrom B, et al. Comparison of health policy documents of European cities: are they oriented to reduce inequalities in health? *J Public Health Policy* 2013; 34: 100-20. Study design.
18. Brady D, Marquandt S, Gauchat G, et al. Path dependency and the politics of socialized health care. *J Health Politics Pol Law* 2016; 41: 355-92. No eligible outcomes.
19. Burstrom B, Whitehead M, Clayton S, et al. Health inequalities between lone and couple mothers and policy under different welfare regimes – the example of Italy, Sweden and Britain. *Soc Sci Med* 2010; 70: 912–20. Duplicate.
20. Carbone G. Do new democracies deliver social welfare? Political regimes and health policy in Ghana and Cameroon. *Democratization* 2012; 19(2): 157-83. No relevant outcomes.
21. Chauvel L, Leist AK. Socioeconomic hierarchy and health gradient in Europe: the role of income inequality and of social origins. *Int J Equity Health* 2015; 14: 132. No eligible exposures.
22. Clark SE, Hawkes C, Murphy SM, et al. Exporting obesity: US farm and trade policy and the transformation of the Mexican consumer food environment. *Int J Occupat Environ Health* 2012; 18: 54-64. No eligible comparisons.
23. Christiansen NV, Kahlmeier S, Racioppi F. Sport promotion policies in the European Union: results of a contents analysis. *Scand J Med Sci Sports* 2014; 24: 428-38. Study design.
24. Chuang K-Y, Sung P-W, Chang C-J, et al. Political and economic characteristics as moderators of the relationship between health services and infant mortality in lessdeveloped countries. *J Epidemiol Community Health* 2013; 67: 1006-12. Duplicate.
25. Cross P, Edwards RT, Nyeko P, et al. The potential impact on farmer health of enhanced export horticultural trade between the U.K. and Uganda. *Int J Environ Res Public Health* 2009; 6: 1539-56. No eligible comparisons.
26. De Andrade LOM, Pellegrini Fillho A, Solar O, et al. Social determinants of health, universal health coverage, and sustainable development.: case studies from Latin American countries. *Lancet* 2015; 385: 1343-51. Study design.
27. De Vogli R, Kouvonen A, Gimeno D. ‘Globesization’: ecological evidence on the relationship between fast food outlets and obesity among 26 advanced economies. *Crit Public Health* 2011; 21: 395-402. No eligible exposures.
28. Docherty WJ, Mendenhall TJ, Berge JM. The Families and Democracy and Citizen Health Care Project. *J Marital Family Ther* 2010; 36: 389-402. No relevant comparisons.
29. Etherington D, Ingold J. Welfare to work and the inclusive labour market: a comparative study of activation policies for disability and long-term sickness claimants in the UK and Denmark. *J Eur Soc Policy* 2012; 22(1): 30-44. No eligible outcomes.
30. Elgar FJ, Davis CG, Wohl MJ, et al. Social capital, health and life satisfaction in 50 countries. *Health Place* 2011; 17, 1044-53. No eligible exposures.
31. Fazel S, Geddes JR, Kushel M. The health of homeless people in high-income countries: descriptive epidemiology, health consequences, and clinical and policy recommendations. *Lancet* 2014; 384, 1529-40. Not primary research.
32. Ferrarini T, Sjöberg O. Social policy and health: transition countries in a comparative analysis. *Int J Soc Welfare* 2010; 19: S60-88. Study design.
33. Friel S, Gleeson D, Thow A-M, et al. A new generation of trade policy: potential risks to diet-related health from the trans pacific partnership agreement. *Global Health* 2013; 9: 46. Study design.

- 1
- 2
- 3
- 4 34. Gregorio LE, Gregorio DI. Polity and health care expenditures: the association among 159
- 5 nations. *J Epidemiol Global Health* 2013; 3: 49-57. No eligible outcomes.
- 6
- 7 35. Gustafsson N-KJ, Ramstedt MR. Changes in alcohol-related harm in Sweden after increasing
- 8 alcohol import quotas and a Danish tax decrease - an interrupted time-series analysis for
- 9 2000-2007. *Int J Epidemiol* 2011; 40, 432-40. No eligible comparisons.
- 10
- 11 36. Habibov NN, Afandi EN. Self-rated health and social capital in transitional countries:
- 12 multilevel analysis of comparative surveys in Armenia, Azerbaijan and Georgia. *Soc Sci Med*
- 13 2011; 72: 1993-204. No eligible exposures.
- 14
- 15 37. Habibov N. Who wants to redistribute? An analysis of 14 post-Soviet nations. *Soc Policy*
- 16 *Admin* 2013; 47: 262-86. No eligible outcomes.
- 17
- 18 38. Harding R, Stasavage D. What democracy does (and doesn't do) for basic services: school
- 19 fees, school inputs, and African elections. *J Politics* 2013; 76: 229-45. No eligible outcomes.
- 20
- 21 39. Herwartz H, Theilen B. Health care and ideology: a reconsideration of political determinants
- 22 of public healthcare funding in the OECD. *Health Econom* 2014; 23, 225-40. No eligible
- 23 outcomes.
- 24
- 25 40. Herwartz H, Theilen B. Partisan influence on social spending under market integration, fiscal
- 26 pressure and institutional change. *Eur J Polit Econ* 2014; 34, 40924. No eligible outcomes.
- 27
- 28 41. Hicken A, Kollman K, Simmons JW. Party system nationalization and the provision of public
- 29 health services. *Polit Sci Res Meth* 2016; 4: 573-94. No eligible exposures.
- 30
- 31 42. Higo M, Khan HTA. Global population aging: unequal distribution of risks in later life between
- 32 developed and developing countries. *Glob Soc Policy* 2015; 15(2): 146-66. Study design.
- 33
- 34 43. Hogan MC, Foreman KJ, Naghavi M, et al. Maternal mortality for 181 countries, 1880-2008: a
- 35 systematic analysis of progress towards Millennium Development Goal 5. *Lancet* 2010; 375,
- 36 1609-23. Study design.
- 37
- 38 44. Huber E, Mustillo T, Stephens JD. Politics and social spending in Latin America. *J Polit* 2008;
- 39 70: 420-36. No eligible outcomes.
- 40
- 41 45. James PD, Wilkins R, Detsky AS, et al. Avoidable mortality by neighbourhood income in
- 42 Canada: 25 years after the establishment of universal health insurance. *J Epidemiol*
- 43 *Community Health*. 2007, 61: 287-96. No eligible comparisons.
- 44
- 45 46. Jensen C. Two sides of the same coin? Left-wing governments and labour unions as
- 46 determinants of public spending. *Socioeconom Rev* 2012; 10: 217-40. No eligible outcomes.
- 47
- 48 47. Jensen C. Marketization via compensation: health care and the politics of the right in
- 49 advanced industrialized nations. *Br J Polit Sci* 2011; 41: 907-26. Study design.
- 50
- 51 48. Kaufman RR, Segura-Ubierno A. Globalization, domestic politics and social spending in Latin
- 52 America: a time-series cross-section analysis, 1973-1997. *Dados* 2001; 44: 435-79. No
- 53 eligible outcomes.
- 54
- 55 49. Kawachi I. Globalization and workers' health. *Ind. Health* 2008; 46: 421-23. Study design.
- 56
- 57 50. Kawiorska D. Healthcare in the light of the concept of welfare state regimes:
- 58 comparative analysis of EU member states. *Oeconomia Coperanicana* 2016; 7: 187206. No
- 59 eligible outcomes.
- 60
- 61 51. Korda RJ, Butler JR, Clements MS, et al. Differential impacts of health care in Australia: trend
- 62 analysis of socioeconomic inequalities in avoidable mortality. *Int J Epidemiol*. 2007; 36: 157-
- 63 165. No eligible comparisons.
- 64
- 65 52. Koutsogeorgou E, Nyqvist F, Nygård M, et al. Social capital and self-rated health among older
- 66 adults: a comparative analysis of Finland, Poland and Spain. *Ageing Soc* 2015; 35: 653-67. No
- 67 eligible exposures.
- 68
- 69 53. Levecque K, van Rossem R, Ronda E, et al. Depression in different welfare state regimes in
- 70 Europe: the role of attitudes towards state responsibility for an adequate standard of living. *J*
- 71 *Epidemiol Community Health* 2011; 65: A126. Abstract only.

- 1
  - 2
  - 3
  - 4
  - 5
  - 6
  - 7
  - 8
  - 9
  - 10
  - 11
  - 12
  - 13
  - 14
  - 15
  - 16
  - 17
  - 18
  - 19
  - 20
  - 21
  - 22
  - 23
  - 24
  - 25
  - 26
  - 27
  - 28
  - 29
  - 30
  - 31
  - 32
  - 33
  - 34
  - 35
  - 36
  - 37
  - 38
  - 39
  - 40
  - 41
  - 42
  - 43
  - 44
  - 45
  - 46
  - 47
  - 48
  - 49
  - 50
  - 51
  - 52
  - 53
  - 54
  - 55
  - 56
  - 57
  - 58
  - 59
  - 60
54. Liang LL, Mirelman AJ. An assessment of socio-political determinants and international aid for government health expenditures. *Soc Sci Med* 2014; 114: 161-8. No eligible outcomes.
55. McMichael AJ. Globalization, climate change, and human health. *N Engl J Med* 2013; 368: 1335-43. Study design.
56. Mackenbach JP. Cultural values and population health: a quantitative analysis of variations in cultural values, health behaviours and health outcomes among 42 European countries. *Health Place* 2014; 28: 116-32. No eligible exposures.
57. Mackenbach JP, Karanikolos M, Lopez Bernal J, et al. Why did life expectancy in Central and Eastern Europe suddenly improve in the 1990s? An analysis by cause of death. *Scand J Public Health* 2015; 43: 796-801. No eligible exposures.
58. Marmot M, Allen J, Bell R, et al. WHO European review of social determinants of health and the health. *Lancet* 2012; 380: 1011-29. Study design.
59. Marten R, McIntyre D, Travassos C, et al. An assessment of progress towards universal health coverage in Brazil, Russia, India, China, and South Africa (BRICS). *Lancet* 2014; 384: 2164-71. Study design.
60. Minicuci N, León Díaz EM, Gómez León M, et al. Disability-free life expectancy: a cross-national comparison among Bulgarian, Italian and Latin American older population. *J Aging Health* 2011; 23: 629-81. No eligible political variables.
61. Moene KO, Wallerstein M. Earnings inequality and welfare spending – a disaggregated analysis. *World Polit* 2003; 55: 485–516. No eligible outcomes.
62. Molina-Mula J, de Pedro-Gómez JE. Impact of the politics of austerity in the quality of healthcare: ethical advice. *Nurs Philosoph* 2013; 14: 53-60. Study design.
63. Moller S, Misra J, Strader E. A cross-national look at how welfare states reduce inequality. *Sociol Compass* 2013; 7(2): 135-46. Study design.
64. Mukhopadhyay K, Chaudhuri S. Economic liberalisation, gender wage inequality and welfare. *J Internat Econ Dev* 2013; 22: 1214-39. No relevant outcomes.
65. Muntaner C. Democracy, authoritarianism, political conflict and population health: a global, comparative, and historical approach. *Soc Sci Med* 2013; 86: 107-12. Study design.
66. Muntaner C, Borrell C, Solà J, et al. Class relations and all-cause mortality: a test of Wright's social class scheme using the Barcelona 2000 Health Interview Survey. *Int J Health Serv* 2011; 41: 431-58. No relevant comparisons.
67. Muntaner C, Benach J, Chung H, et al. Welfare state, labour market inequalities and health. In a global context: an integrated framework. *SESPAS Report 2010. Gaceta Sanitaria* 2010; 24: 56-61. Study design.
68. Muntaner C, Chung H, Solar O, et al. A macro-level model of employment relations and health inequalities. *Int J Health Serv* 2010; 40(2): 215-21. Study design.
69. Nyquist F, Nygård M. Is the association between social capital and health robust across the Nordic regions? Evidence from a cross-sectional survey of older adults. *Int J Soc Welfare* 2013; 22(2): 119-29. No eligible exposures.
70. Or Z, Cases C, Lisac M, et al. Are health problems systemic? Politics of access and choice under Beveridge and Bismarck systems? *Health Econom Policy Law* 2010; 5: 269-93. Study design.
71. Raine KD. Obesity epidemics: inevitable outcome of globalization or preventable public health challenge? *Int J Public Health* 2012; 57: 35-6. Study design.
72. Razzak JA, Khan UR, Azam I, et al. Health disparities between Muslim and non-Muslim countries. *East Mediterr Health J* 2011; 18: 654-64. No eligible exposures.
73. Reeves A, McKee M, Basu S, et al. The political economy of austerity and healthcare: cross-national analysis of expenditure changes in 27 European nations, 1995-2011. No eligible outcomes.

- 1  
2  
3  
4  
5  
6  
7  
8  
9  
10  
11  
12  
13  
14  
15  
16  
17  
18  
19  
20  
21  
22  
23  
24  
25  
26  
27  
28  
29  
30  
31  
32  
33  
34  
35  
36  
37  
38  
39  
40  
41  
42  
43  
44  
45  
46  
47  
48  
49  
50  
51  
52  
53  
54  
55  
56  
57  
58  
59  
60
74. Simons AMW, Groffen DAI, Bosma H. Socio-economic inequalities in all-cause mortality in Europe: an exploration of the role of heightened social mobility. *Eur J Public Health* 2013; 23: 1010-2. No eligible exposures.
75. Vågerö D. The East-West health divide in Europe: growing and shifting eastwards. *J Soc Pol Studs* 2010; 8(3): 319-30. Study design.
76. Victora CG, Barros AJD, Axelson H, et al. How changes in coverage affect equity in maternal and child health interventions in 35 Countdown to 2015 countries: an analysis of national surveys. *Lancet* 2012; 380: 1149-56. No eligible exposures.
77. Wahrendorf M, Reinhardt JD, Siegrist J. Relationships of disability with age among adults aged 50 to 85: evidence from the United States, England and Continental Europe. *PLoS ONE* 2013; 8: e71893. No eligible exposures.
78. Wang Y, Lim H. The global childhood obesity epidemic and the association between socio-economic status and childhood obesity. *Int Rev Psychiatr* 2012; 24: 176-88. No eligible exposures.
79. Wilkinson RG, Pickett K. *The spirit level: why equality is better for everyone*. London: Penguin; 2010. Study design.
80. Wismar M, McQueen D, Lin V, et al. Rethinking the politics and implementation of health in all policies. *Israel J Health Policy Res* 2013; 2: 17. Study design.
81. Yamashita T, Kunkel SR. An international comparison of the association among literacy, education and health across the United States, Canada, Switzerland, Italy, Norway and Bermuda: implications for health disparities. *Asian J Soc Psychol* 2016; 18: 264-74. No eligible exposures.
82. Younsi M, Chakroun M. Does social capital determine health? Empirical evidence from MENA countries. *Soc Sci J* 2016; 53(3): 371-9. No eligible exposures.



# PRISMA 2009 Checklist

| Section/topic                      | #  | Checklist item                                                                                                                                                                                                                                                                                              | Reported on page #       |
|------------------------------------|----|-------------------------------------------------------------------------------------------------------------------------------------------------------------------------------------------------------------------------------------------------------------------------------------------------------------|--------------------------|
| <b>TITLE</b>                       |    |                                                                                                                                                                                                                                                                                                             |                          |
| Title                              | 1  | Identify the report as a systematic review, meta-analysis, or both.                                                                                                                                                                                                                                         | 1                        |
| <b>ABSTRACT</b>                    |    |                                                                                                                                                                                                                                                                                                             |                          |
| Structured summary                 | 2  | Provide a structured summary including, as applicable: background; objectives; data sources; study eligibility criteria, participants, and interventions; study appraisal and synthesis methods; results; limitations; conclusions and implications of key findings; systematic review registration number. | 2                        |
| <b>INTRODUCTION</b>                |    |                                                                                                                                                                                                                                                                                                             |                          |
| Rationale                          | 3  | Describe the rationale for the review in the context of what is already known.                                                                                                                                                                                                                              | 4-5                      |
| Objectives                         | 4  | Provide an explicit statement of questions being addressed with reference to participants, interventions, comparisons, outcomes, and study design (PICOS).                                                                                                                                                  | 5                        |
| <b>METHODS</b>                     |    |                                                                                                                                                                                                                                                                                                             |                          |
| Protocol and registration          | 5  | Indicate if a review protocol exists, if and where it can be accessed (e.g., Web address), and, if available, provide registration information including registration number.                                                                                                                               | NA                       |
| Eligibility criteria               | 6  | Specify study characteristics (e.g., PICOS, length of follow-up) and report characteristics (e.g., years considered, language, publication status) used as criteria for eligibility, giving rationale.                                                                                                      | 6                        |
| Information sources                | 7  | Describe all information sources (e.g., databases with dates of coverage, contact with study authors to identify additional studies) in the search and date last searched.                                                                                                                                  | 6                        |
| Search                             | 8  | Present full electronic search strategy for at least one database, including any limits used, such that it could be repeated.                                                                                                                                                                               | Table 1                  |
| Study selection                    | 9  | State the process for selecting studies (i.e., screening, eligibility, included in systematic review, and, if applicable, included in the meta-analysis).                                                                                                                                                   | 5-7                      |
| Data collection process            | 10 | Describe method of data extraction from reports (e.g., piloted forms, independently, in duplicate) and any processes for obtaining and confirming data from investigators.                                                                                                                                  | 7                        |
| Data items                         | 11 | List and define all variables for which data were sought (e.g., PICOS, funding sources) and any assumptions and simplifications made.                                                                                                                                                                       | 7                        |
| Risk of bias in individual studies | 12 | Describe methods used for assessing risk of bias of individual studies (including specification of whether this was done at the study or outcome level), and how this information is to be used in any data synthesis.                                                                                      | 7                        |
| Summary measures                   | 13 | State the principal summary measures (e.g., risk ratio, difference in means).                                                                                                                                                                                                                               | 7, but not meta-analysis |





# PRISMA 2009 Checklist

|                      |    |                                                                                                                                                           |                         |
|----------------------|----|-----------------------------------------------------------------------------------------------------------------------------------------------------------|-------------------------|
| Synthesis of results | 14 | Describe the methods of handling data and combining results of studies, if done, including measures of consistency (e.g., $I^2$ ) for each meta-analysis. | 7, but no meta-analysis |
|----------------------|----|-----------------------------------------------------------------------------------------------------------------------------------------------------------|-------------------------|

Page 1 of 2

| Section/topic                 | #  | Checklist item                                                                                                                                                                                           | Reported on page #                  |
|-------------------------------|----|----------------------------------------------------------------------------------------------------------------------------------------------------------------------------------------------------------|-------------------------------------|
| Risk of bias across studies   | 15 | Specify any assessment of risk of bias that may affect the cumulative evidence (e.g., publication bias, selective reporting within studies).                                                             | NA, no meta-analysis                |
| Additional analyses           | 16 | Describe methods of additional analyses (e.g., sensitivity or subgroup analyses, meta-regression), if done, indicating which were pre-specified.                                                         | NA, no meta-analysis                |
| <b>RESULTS</b>                |    |                                                                                                                                                                                                          |                                     |
| Study selection               | 17 | Give numbers of studies screened, assessed for eligibility, and included in the review, with reasons for exclusions at each stage, ideally with a flow diagram.                                          | 7-8, Figure 2, Supplementary file 1 |
| Study characteristics         | 18 | For each study, present characteristics for which data were extracted (e.g., study size, PICOS, follow-up period) and provide the citations.                                                             | Tables 2-5                          |
| Risk of bias within studies   | 19 | Present data on risk of bias of each study and, if available, any outcome level assessment (see item 12).                                                                                                | 8, Supplementary file 3             |
| Results of individual studies | 20 | For all outcomes considered (benefits or harms), present, for each study: (a) simple summary data for each intervention group (b) effect estimates and confidence intervals, ideally with a forest plot. | Tables 2-5, no meta-analysis        |
| Synthesis of results          | 21 | Present results of each meta-analysis done, including confidence intervals and measures of consistency.                                                                                                  | NA, no meta-analysis                |
| Risk of bias across studies   | 22 | Present results of any assessment of risk of bias across studies (see Item 15).                                                                                                                          | NA, no meta-analysis                |
| Additional analysis           | 23 | Give results of additional analyses, if done (e.g., sensitivity or subgroup analyses, meta-regression [see Item 16]).                                                                                    | NA, no meta-analysis                |
| <b>DISCUSSION</b>             |    |                                                                                                                                                                                                          |                                     |
| Summary of evidence           | 24 | Summarize the main findings including the strength of evidence for each main outcome; consider their relevance to key groups (e.g., healthcare providers, users, and policy makers).                     | 10                                  |
| Limitations                   | 25 | Discuss limitations at study and outcome level (e.g., risk of bias), and at review-level (e.g., incomplete retrieval of identified research, reporting bias).                                            | 11-12                               |



# PRISMA 2009 Checklist

|                |    |                                                                                                                                            |       |
|----------------|----|--------------------------------------------------------------------------------------------------------------------------------------------|-------|
| Conclusions    | 26 | Provide a general interpretation of the results in the context of other evidence, and implications for future research.                    | 13-15 |
| <b>FUNDING</b> |    |                                                                                                                                            |       |
| Funding        | 27 | Describe sources of funding for the systematic review and other support (e.g., supply of data); role of funders for the systematic review. | 15    |

From: Moher D, Liberati A, Tetzlaff J, Altman DG, The PRISMA Group (2009). Preferred Reporting Items for Systematic Reviews and Meta-Analyses: The PRISMA Statement. PLoS Med 6(7): e1000097. doi:10.1371/journal.pmed1000097

For more information, visit: [www.prisma-statement.org](http://www.prisma-statement.org).

Page 2 of 2

Supplementary file 6. Study-level risk of bias assessment

Green = high quality (low risk of bias); Amber = moderate quality (moderate risk of bias) or unknown; Red = low quality (high risk of bias)

| First author, year   | Selection bias                 | Selection bias    | Chance                | Detection bias   | Detection bias  | Detection/Reporting bias | Reporting bias       | Summary |
|----------------------|--------------------------------|-------------------|-----------------------|------------------|-----------------|--------------------------|----------------------|---------|
|                      | Participant representativeness | Group equivalence | Sample size rationale | Exposure measure | Outcome measure | Appropriate analysis     | Conflict of interest |         |
| Ades, 2013           | Green                          | Amber             | Green                 | Green            | Green           | Green                    | Green                | Green   |
| Adeyi, 1997          | Green                          | Amber             | Amber                 | Green            | Green           | Green                    | Green                | Green   |
| Akinci, 2014         | Green                          | Amber             | Amber                 | Green            | Green           | Green                    | Amber                | Amber   |
| Alvarez-Dardet, 2006 | Green                          | Amber             | Green                 | Green            | Green           | Green                    | Green                | Green   |
| Avendano, 2009       | Green                          | Amber             | Amber                 | Green            | Green           | Green                    | Amber                | Amber   |
| Bambra, 2014         | Green                          | Amber             | Green                 | Green            | Green           | Green                    | Green                | Green   |
| Bambra, 2009         | Green                          | Amber             | Amber                 | Green            | Green           | Green                    | Amber                | Amber   |
| Bambra, 2009         | Green                          | Amber             | Amber                 | Green            | Green           | Green                    | Green                | Green   |
| Bambra, 2006         | Green                          | Amber             | Amber                 | Green            | Green           | Green                    | Amber                | Amber   |
| Bambra, 2005         | Green                          | Amber             | Amber                 | Green            | Green           | Green                    | Amber                | Amber   |
| Batniji, 2014        | Green                          | Amber             | Green                 | Green            | Green           | Green                    | Green                | Green   |
| Baum, 2003           | Green                          | Amber             | Amber                 | Green            | Green           | Green                    | Amber                | Amber   |

| First author, year | Selection bias                 | Selection bias    | Chance                | Detection bias   | Detection bias  | Detection/Reporting bias | Reporting bias       | Summary |
|--------------------|--------------------------------|-------------------|-----------------------|------------------|-----------------|--------------------------|----------------------|---------|
|                    | Participant representativeness | Group equivalence | Sample size rationale | Exposure measure | Outcome measure | Appropriate analysis     | Conflict of interest |         |
| Bergh, 2010        |                                |                   |                       |                  |                 |                          |                      |         |
| Besley, 2006       |                                |                   |                       |                  |                 |                          |                      |         |
| Bosdriesz, 2015    |                                |                   |                       |                  |                 |                          |                      |         |
| Borrell, 2009      |                                |                   |                       |                  |                 |                          |                      |         |
| Bozorgmehr, 2014   |                                |                   |                       |                  |                 |                          |                      |         |
| Bradley, 2011      |                                |                   |                       |                  |                 |                          |                      |         |
| Brandt, 2014       |                                |                   |                       |                  |                 |                          |                      |         |
| Bremberg, 2016     |                                |                   |                       |                  |                 |                          |                      |         |
| Burroway, 2016     |                                |                   |                       |                  |                 |                          |                      |         |
| Burstrom, 2010     |                                |                   |                       |                  |                 |                          |                      |         |
| Cereseto, 1986     |                                |                   |                       |                  |                 |                          |                      |         |
| Chuang, 2013       |                                |                   |                       |                  |                 |                          |                      |         |
| Chuang, 2013       |                                |                   |                       |                  |                 |                          |                      |         |

1  
2  
3  
4  
5  
6  
7  
8  
9  
10  
11  
12  
13  
14  
15  
16  
17  
18  
19  
20  
21  
22  
23  
24  
25  
26  
27  
28  
29  
30  
31  
32  
33  
34  
35  
36  
37  
38  
39  
40  
41  
42  
43  
44  
45  
46

| First author, year | Selection bias                 | Selection bias    | Chance                | Detection bias   | Detection bias  | Detection/Reporting bias | Reporting bias       | Summary |
|--------------------|--------------------------------|-------------------|-----------------------|------------------|-----------------|--------------------------|----------------------|---------|
|                    | Participant representativeness | Group equivalence | Sample size rationale | Exposure measure | Outcome measure | Appropriate analysis     | Conflict of interest |         |
| Chung, 2006        | Green                          | Yellow            | Yellow                | Green            | Green           | Green                    | Yellow               | Yellow  |
| Conley, 2001       | Green                          | Yellow            | Yellow                | Green            | Green           | Green                    | Yellow               | Yellow  |
| Copeland, 2015     | Yellow                         | Yellow            | Yellow                | Green            | Green           | Green                    | Green                | Yellow  |
| Correa, 1992       | Green                          | Yellow            | Green                 | Green            | Green           | Green                    | Yellow               | Green   |
| Corsi, 2014        | Green                          | Yellow            | Green                 | Green            | Green           | Green                    | Green                | Green   |
| Costa-Font, 2016   | Green                          | Yellow            | Yellow                | Green            | Green           | Green                    | Green                | Green   |
| Craveiro, 2017     | Green                          | Yellow            | Yellow                | Green            | Green           | Green                    | Green                | Green   |
| Cross, 2009        | Yellow                         | Yellow            | Yellow                | Green            | Green           | Green                    | Green                | Yellow  |
| De Vogli, 2014     | Green                          | Yellow            | Yellow                | Green            | Green           | Green                    | Green                | Green   |
| Dahl, 2013         | Green                          | Yellow            | Yellow                | Green            | Green           | Green                    | Yellow               | Yellow  |
| Deeming, 2012      | Green                          | Yellow            | Yellow                | Green            | Green           | Green                    | Yellow               | Yellow  |
| Devaux, 2015       | Green                          | Yellow            | Yellow                | Green            | Green           | Green                    | Green                | Green   |
| Dietrich, 2015     | Green                          | Yellow            | Yellow                | Green            | Green           | Green                    | Yellow               | Yellow  |
| Doherty, 2010      | Green                          | Yellow            | Yellow                | Green            | Green           | Green                    | Green                | Green   |

| First author, year  | Selection bias                 | Selection bias    | Chance                | Detection bias   | Detection bias  | Detection/Reporting bias | Reporting bias       | Summary |
|---------------------|--------------------------------|-------------------|-----------------------|------------------|-----------------|--------------------------|----------------------|---------|
|                     | Participant representativeness | Group equivalence | Sample size rationale | Exposure measure | Outcome measure | Appropriate analysis     | Conflict of interest |         |
| Dujardin, 2011      |                                |                   |                       |                  |                 |                          |                      |         |
| Eikemo, 2008        |                                |                   |                       |                  |                 |                          |                      |         |
| Eikemo, 2008        |                                |                   |                       |                  |                 |                          |                      |         |
| Elgar, 2011         |                                |                   |                       |                  |                 |                          |                      |         |
| Elola, 1995         |                                |                   |                       |                  |                 |                          |                      |         |
| Engster, 2011       |                                |                   |                       |                  |                 |                          |                      |         |
| Esmaeli, 2011       |                                |                   |                       |                  |                 |                          |                      |         |
| Espelt, 2008        |                                |                   |                       |                  |                 |                          |                      |         |
| Esser, 2010         |                                |                   |                       |                  |                 |                          |                      |         |
| Estimé, 2014        |                                |                   |                       |                  |                 |                          |                      |         |
| Fan, 2015           |                                |                   |                       |                  |                 |                          |                      |         |
| Farfan-Portet, 2010 |                                |                   |                       |                  |                 |                          |                      |         |
| Fayissa, 2001       |                                |                   |                       |                  |                 |                          |                      |         |
| Foubert, 2014       |                                |                   |                       |                  |                 |                          |                      |         |

1  
2  
3  
4  
5  
6  
7  
8  
9  
10  
11  
12  
13  
14  
15  
16  
17  
18  
19  
20  
21  
22  
23  
24  
25  
26  
27  
28  
29  
30  
31  
32  
33  
34  
35  
36  
37  
38  
39  
40  
41  
42  
43  
44  
45  
46

| First author, year | Selection bias                 | Selection bias    | Chance                | Detection bias   | Detection bias  | Detection/Reporting bias | Reporting bias       | Summary |
|--------------------|--------------------------------|-------------------|-----------------------|------------------|-----------------|--------------------------|----------------------|---------|
|                    | Participant representativeness | Group equivalence | Sample size rationale | Exposure measure | Outcome measure | Appropriate analysis     | Conflict of interest |         |
| Frey, 1999         |                                |                   |                       |                  |                 |                          |                      |         |
| Fritzell, 2012     |                                |                   |                       |                  |                 |                          |                      |         |
| Fritzell, 2013     |                                |                   |                       |                  |                 |                          |                      |         |
| Fumagalli, 2013    |                                |                   |                       |                  |                 |                          |                      |         |
| Gauri, 2002        |                                |                   |                       |                  |                 |                          |                      |         |
| Gerring, 2008      |                                |                   |                       |                  |                 |                          |                      |         |
| Gesthuizen, 2012   |                                |                   |                       |                  |                 |                          |                      |         |
| Ghobarah, 2004     |                                |                   |                       |                  |                 |                          |                      |         |
| Gilligan, 2015     |                                |                   |                       |                  |                 |                          |                      |         |
| Gizeles, 2009      |                                |                   |                       |                  |                 |                          |                      |         |
| Glass, 2016        |                                |                   |                       |                  |                 |                          |                      |         |
| Goryakin, 2015     |                                |                   |                       |                  |                 |                          |                      |         |
| Granados, 2010     |                                |                   |                       |                  |                 |                          |                      |         |

|    |                    |  |  |  |  |  |  |  |
|----|--------------------|--|--|--|--|--|--|--|
| 1  |                    |  |  |  |  |  |  |  |
| 2  |                    |  |  |  |  |  |  |  |
| 3  |                    |  |  |  |  |  |  |  |
| 4  | Jorgenson,<br>2009 |  |  |  |  |  |  |  |
| 5  | Jorgenson,<br>2009 |  |  |  |  |  |  |  |
| 6  | Jorgenson,<br>2009 |  |  |  |  |  |  |  |
| 7  | Karim,<br>2010     |  |  |  |  |  |  |  |
| 8  | Karim,<br>2010     |  |  |  |  |  |  |  |
| 9  | Karim,<br>2010     |  |  |  |  |  |  |  |
| 10 | Kick, 1990         |  |  |  |  |  |  |  |
| 11 | Kick, 1990         |  |  |  |  |  |  |  |
| 12 | Klenk, 2016        |  |  |  |  |  |  |  |
| 13 | Klenk, 2016        |  |  |  |  |  |  |  |
| 14 | Klomp,<br>2008     |  |  |  |  |  |  |  |
| 15 |                    |  |  |  |  |  |  |  |
| 16 |                    |  |  |  |  |  |  |  |
| 17 |                    |  |  |  |  |  |  |  |
| 18 |                    |  |  |  |  |  |  |  |
| 19 |                    |  |  |  |  |  |  |  |
| 20 |                    |  |  |  |  |  |  |  |
| 21 |                    |  |  |  |  |  |  |  |
| 22 |                    |  |  |  |  |  |  |  |
| 23 |                    |  |  |  |  |  |  |  |
| 24 |                    |  |  |  |  |  |  |  |
| 25 |                    |  |  |  |  |  |  |  |
| 26 |                    |  |  |  |  |  |  |  |
| 27 |                    |  |  |  |  |  |  |  |
| 28 |                    |  |  |  |  |  |  |  |
| 29 |                    |  |  |  |  |  |  |  |
| 30 |                    |  |  |  |  |  |  |  |
| 31 |                    |  |  |  |  |  |  |  |
| 32 |                    |  |  |  |  |  |  |  |
| 33 |                    |  |  |  |  |  |  |  |
| 34 |                    |  |  |  |  |  |  |  |
| 35 |                    |  |  |  |  |  |  |  |
| 36 |                    |  |  |  |  |  |  |  |
| 37 |                    |  |  |  |  |  |  |  |
| 38 |                    |  |  |  |  |  |  |  |
| 39 |                    |  |  |  |  |  |  |  |
| 40 |                    |  |  |  |  |  |  |  |
| 41 |                    |  |  |  |  |  |  |  |
| 42 |                    |  |  |  |  |  |  |  |
| 43 |                    |  |  |  |  |  |  |  |
| 44 |                    |  |  |  |  |  |  |  |
| 45 |                    |  |  |  |  |  |  |  |
| 46 |                    |  |  |  |  |  |  |  |



1  
2  
3  
4  
5  
6  
7  
8  
9  
10  
11  
12  
13  
14  
15  
16  
17  
18  
19  
20  
21  
22  
23  
24  
25  
26  
27  
28  
29  
30  
31  
32  
33  
34  
35  
36  
37  
38  
39  
40  
41  
42  
43  
44  
45  
46

| First author, year     | Selection bias                 | Selection bias    | Chance                | Detection bias   | Detection bias  | Detection/Reporting bias | Reporting bias       | Summary |
|------------------------|--------------------------------|-------------------|-----------------------|------------------|-----------------|--------------------------|----------------------|---------|
|                        | Participant representativeness | Group equivalence | Sample size rationale | Exposure measure | Outcome measure | Appropriate analysis     | Conflict of interest |         |
| Krueger, 2015          |                                |                   |                       |                  |                 |                          |                      |         |
| Kudamatsu, 2012        |                                |                   |                       |                  |                 |                          |                      |         |
| Kuovo, 2015            |                                |                   |                       |                  |                 |                          |                      |         |
| Lahelma, 1994          |                                |                   |                       |                  |                 |                          |                      |         |
| Lake, 2001             |                                |                   |                       |                  |                 |                          |                      |         |
| Lena, 1993             |                                |                   |                       |                  |                 |                          |                      |         |
| Levecque, 2011         |                                |                   |                       |                  |                 |                          |                      |         |
| Levecque, 2015         |                                |                   |                       |                  |                 |                          |                      |         |
| Levine, 2006           |                                |                   |                       |                  |                 |                          |                      |         |
| Lin, 2012              |                                |                   |                       |                  |                 |                          |                      |         |
| Lin, 2014              |                                |                   |                       |                  |                 |                          |                      |         |
| London, 1990           |                                |                   |                       |                  |                 |                          |                      |         |
| López-Casasnovas, 2014 |                                |                   |                       |                  |                 |                          |                      |         |
| Lundberg, 2008         |                                |                   |                       |                  |                 |                          |                      |         |

| First author, year    | Selection bias                 | Selection bias    | Chance                | Detection bias   | Detection bias  | Detection/Reporting bias | Reporting bias       | Summary |
|-----------------------|--------------------------------|-------------------|-----------------------|------------------|-----------------|--------------------------|----------------------|---------|
|                       | Participant representativeness | Group equivalence | Sample size rationale | Exposure measure | Outcome measure | Appropriate analysis     | Conflict of interest |         |
| Mackenbach, 2013      |                                |                   |                       |                  |                 |                          |                      |         |
| Mackenbach, 2013      |                                |                   |                       |                  |                 |                          |                      |         |
| Mackenbach, 2013      |                                |                   |                       |                  |                 |                          |                      |         |
| Martens, 2010         |                                |                   |                       |                  |                 |                          |                      |         |
| Maynard, 2015         |                                |                   |                       |                  |                 |                          |                      |         |
| Maynard, 2016         |                                |                   |                       |                  |                 |                          |                      |         |
| Miething, 2013        |                                |                   |                       |                  |                 |                          |                      |         |
| Menon-Johansson, 2005 |                                |                   |                       |                  |                 |                          |                      |         |
| Milner, 2011          |                                |                   |                       |                  |                 |                          |                      |         |
| Minagawa, 2013        |                                |                   |                       |                  |                 |                          |                      |         |
| Moon, 1985            |                                |                   |                       |                  |                 |                          |                      |         |
| Moor, 2013            |                                |                   |                       |                  |                 |                          |                      |         |
| Moore, 2006           |                                |                   |                       |                  |                 |                          |                      |         |

1  
2  
3  
4  
5  
6  
7  
8  
9  
10  
11  
12  
13  
14  
15  
16  
17  
18  
19  
20  
21  
22  
23  
24  
25  
26  
27  
28  
29  
30  
31  
32  
33  
34  
35  
36  
37  
38  
39  
40  
41  
42  
43  
44  
45  
46

| First author, year | Selection bias                 | Selection bias    | Chance                | Detection bias   | Detection bias  | Detection/Reporting bias | Reporting bias       | Summary |
|--------------------|--------------------------------|-------------------|-----------------------|------------------|-----------------|--------------------------|----------------------|---------|
|                    | Participant representativeness | Group equivalence | Sample size rationale | Exposure measure | Outcome measure | Appropriate analysis     | Conflict of interest |         |
| Muldoon, 2011      |                                |                   |                       |                  |                 |                          |                      |         |
| Muntaner, 2017     |                                |                   |                       |                  |                 |                          |                      |         |
| Muntaner, 2002     |                                |                   |                       |                  |                 |                          |                      |         |
| Navarro, 2006      |                                |                   |                       |                  |                 |                          |                      |         |
| Navarro, 2003      |                                |                   |                       |                  |                 |                          |                      |         |
| Navarro, 2001      |                                |                   |                       |                  |                 |                          |                      |         |
| Navia, 2003        |                                |                   |                       |                  |                 |                          |                      |         |
| Nelson, 2014       |                                |                   |                       |                  |                 |                          |                      |         |
| Norden mark, 2006  |                                |                   |                       |                  |                 |                          |                      |         |
| Novignon, 2012     |                                |                   |                       |                  |                 |                          |                      |         |
| Oberlander, 2017   |                                |                   |                       |                  |                 |                          |                      |         |
| Olafsdottir, 2007  |                                |                   |                       |                  |                 |                          |                      |         |
| Olsen, 2007        |                                |                   |                       |                  |                 |                          |                      |         |
| Oster, 2012        |                                |                   |                       |                  |                 |                          |                      |         |

| First author, year  | Selection bias                 | Selection bias    | Chance                | Detection bias   | Detection bias  | Detection/Reporting bias | Reporting bias       | Summary |
|---------------------|--------------------------------|-------------------|-----------------------|------------------|-----------------|--------------------------|----------------------|---------|
|                     | Participant representativeness | Group equivalence | Sample size rationale | Exposure measure | Outcome measure | Appropriate analysis     | Conflict of interest |         |
| Owen, 2007          |                                |                   |                       |                  |                 |                          |                      |         |
| Palència, 2013      |                                |                   |                       |                  |                 |                          |                      |         |
| Pickett, 2007       |                                |                   |                       |                  |                 |                          |                      |         |
| Pillai, 2006        |                                |                   |                       |                  |                 |                          |                      |         |
| Pinzón-Flórez, 2015 |                                |                   |                       |                  |                 |                          |                      |         |
| Platts, 2015        |                                |                   |                       |                  |                 |                          |                      |         |
| Ploubidis, 2012     |                                |                   |                       |                  |                 |                          |                      |         |
| Popham, 2013        |                                |                   |                       |                  |                 |                          |                      |         |
| Raphael, 2004       |                                |                   |                       |                  |                 |                          |                      |         |
| Reeves, 2014        |                                |                   |                       |                  |                 |                          |                      |         |
| Richter, 2012       |                                |                   |                       |                  |                 |                          |                      |         |
| Ross, 2006          |                                |                   |                       |                  |                 |                          |                      |         |
| Rostila, 2007       |                                |                   |                       |                  |                 |                          |                      |         |
| Rovny, 2011         |                                |                   |                       |                  |                 |                          |                      |         |

1  
2  
3  
4  
5  
6  
7  
8  
9  
10  
11  
12  
13  
14  
15  
16  
17  
18  
19  
20  
21  
22  
23  
24  
25  
26  
27  
28  
29  
30  
31  
32  
33  
34  
35  
36  
37  
38  
39  
40  
41  
42  
43  
44  
45  
46

| First author, year   | Selection bias                 | Selection bias    | Chance                | Detection bias   | Detection bias  | Detection/Reporting bias | Reporting bias       | Summary |
|----------------------|--------------------------------|-------------------|-----------------------|------------------|-----------------|--------------------------|----------------------|---------|
|                      | Participant representativeness | Group equivalence | Sample size rationale | Exposure measure | Outcome measure | Appropriate analysis     | Conflict of interest |         |
| Sacker, 2011         |                                |                   |                       |                  |                 |                          |                      |         |
| Safaei, 2006         |                                |                   |                       |                  |                 |                          |                      |         |
| Sanders, 2009        |                                |                   |                       |                  |                 |                          |                      |         |
| Sarti, 2013          |                                |                   |                       |                  |                 |                          |                      |         |
| Sekine, 2009         |                                |                   |                       |                  |                 |                          |                      |         |
| Shandra, 2010        |                                |                   |                       |                  |                 |                          |                      |         |
| Shandra, 2004        |                                |                   |                       |                  |                 |                          |                      |         |
| Shen, 2001           |                                |                   |                       |                  |                 |                          |                      |         |
| Shen, 1997           |                                |                   |                       |                  |                 |                          |                      |         |
| Shim, 2015           |                                |                   |                       |                  |                 |                          |                      |         |
| Stavrova, 2011       |                                |                   |                       |                  |                 |                          |                      |         |
| Stroup, 2007         |                                |                   |                       |                  |                 |                          |                      |         |
| Stuckler, 2010       |                                |                   |                       |                  |                 |                          |                      |         |
| Tsai, 2006           |                                |                   |                       |                  |                 |                          |                      |         |
| Van der Heuvel, 2013 |                                |                   |                       |                  |                 |                          |                      |         |

| First author, year  | Selection bias                 | Selection bias    | Chance                | Detection bias   | Detection bias  | Detection/Reporting bias | Reporting bias       | Summary |
|---------------------|--------------------------------|-------------------|-----------------------|------------------|-----------------|--------------------------|----------------------|---------|
|                     | Participant representativeness | Group equivalence | Sample size rationale | Exposure measure | Outcome measure | Appropriate analysis     | Conflict of interest |         |
| Van Tuyckom, 2011   | Green                          | Amber             | Green                 | Green            | Green           | Green                    | Green                | Green   |
| Vahid Shahidi, 2016 | Green                          | Amber             | Amber                 | Green            | Green           | Green                    | Green                | Green   |
| Veenhoven, 2000     | Green                          | Amber             | Amber                 | Green            | Green           | Green                    | Amber                | Amber   |
| Veenhoven, 1995     | Green                          | Amber             | Amber                 | Green            | Green           | Green                    | Amber                | Amber   |
| Vöörmann, 2013      | Amber                          | Amber             | Amber                 | Green            | Green           | Green                    | Amber                | Amber   |
| Wejnert, 2008       | Green                          | Amber             | Amber                 | Green            | Green           | Green                    | Amber                | Amber   |
| Whitehead, 2000     | Amber                          | Amber             | Amber                 | Green            | Green           | Green                    | Green                | Amber   |
| Witvliet, 2013      | Green                          | Amber             | Amber                 | Green            | Green           | Green                    | Green                | Green   |
| Wu, 2007            | Green                          | Amber             | Amber                 | Green            | Green           | Green                    | Amber                | Amber   |
| York, 2014          | Green                          | Amber             | Green                 | Green            | Green           | Green                    | Amber                | Green   |
| Zambon, 2006        | Green                          | Amber             | Amber                 | Green            | Green           | Green                    | Amber                | Amber   |
| Zweifel, 2000       | Green                          | Amber             | Amber                 | Green            | Green           | Green                    | Amber                | Amber   |

Green = high quality (low risk of bias); Amber = moderate quality (moderate risk of bias) or unknown; Red = low quality (high risk of bias)

1  
2  
3  
4  
5  
6  
7  
8  
9  
10  
11  
12  
13  
14  
15  
16  
17  
18  
19  
20  
21  
22  
23  
24  
25  
26  
27  
28  
29  
30  
31  
32  
33  
34  
35  
36  
37  
38  
39  
40  
41  
42  
43  
44  
45  
46  
47

Supplementary file 7. Table of study-level characteristics and results for welfare state

| Serial number                       | Authors, publication year | Years of study | Level of analysis | Assessment of economic factors | Setting                                    | Political exposures  | Population health outcomes                           | Result category |
|-------------------------------------|---------------------------|----------------|-------------------|--------------------------------|--------------------------------------------|----------------------|------------------------------------------------------|-----------------|
| <b>Studies from the 2010 review</b> |                           |                |                   |                                |                                            |                      |                                                      |                 |
| 1                                   | Avendano et al, 2009      | 2004-2007      | Ecological        | Yes                            | 11 countries from 3 European regions       | Welfare regimes      | Chronic conditions, self-reported health, depression | Positive        |
| 2                                   | Bambra, 2005              | 1997-1999      | Ecological        | No                             | 18 OECD countries                          | Welfare regimes      | Health care index                                    | Positive        |
| 3                                   | Bambra, 2006              | 1980-1998      | Ecological        | No                             | 18 OECD countries                          | Welfare regimes      | Infant mortality                                     | Positive        |
| 4                                   | Bambra and Eikemo, 2009   | 2002-2004      | Individual        | No                             | 37,499 persons from 21 European countries  | Welfare regimes      | Self-reported health, long-standing illness          | Positive        |
| 5                                   | Bambra et al, 2009        | 1998-2004      | Individual        | No                             | 118,245 persons from 13 European countries | Welfare regimes      | Self-rated health                                    | Inconclusive    |
| 6                                   | Burstrom et al, 2010      | 1999-2001      | Individual        | Yes                            | 28,485 persons from                        | Family policy models | Self-rated health, limiting long-                    | Positive        |

|    |                           |           |            |     |                                            |                                         |                                                                      |              |
|----|---------------------------|-----------|------------|-----|--------------------------------------------|-----------------------------------------|----------------------------------------------------------------------|--------------|
|    |                           |           |            |     | Italy, Sweden and Britain                  |                                         | standing illness                                                     |              |
| 7  | Chung and Muntaner, 2006  | 1960-1994 | Ecological | Yes | 19 wealthy OECD countries                  | Public sector medical care              | Infant mortality rate, low birth weight, under-five mortality weight | Positive     |
| 8  | Chung and Muntaner, 2007  | 1960-1998 | Ecological | Yes | 18 wealthy countries                       | Welfare regimes                         | Infant mortality rate, low birth weight                              | Positive     |
| 9  | Conley and Springer, 2001 | 1960-1992 | Ecological | Yes | 19 OECD countries                          | Welfare regimes, welfare state spending | Infant mortality                                                     | Positive     |
| 10 | Dahl et al, 2006          | 1970-2005 | Ecological | Yes | Up to 11 European countries                | Welfare regimes                         | Absolute and relative health inequalities                            | Inconclusive |
| 11 | Eikemo et al, 2008        | 2002-2004 | Individual | No  | 69, 821 persons from 23 European countries | Welfare regimes                         | Self-reported health, limiting longstanding illness                  | Inconclusive |
| 12 | Eikemo et al, 2008        | 2002-2004 | Individual | No  | 65, 065 persons from 21 European countries | Welfare regimes                         | Subjective poor health, limiting longstanding illness                | Positive     |
| 13 | Elola et al, 1995         | 1990-1991 | Ecological | Yes | 17 Western European countries              | Health care system                      | Infant mortality, life expectancy                                    | Positive     |



|    |                           |           |            |     |                                                             |                           |                                                                |              |
|----|---------------------------|-----------|------------|-----|-------------------------------------------------------------|---------------------------|----------------------------------------------------------------|--------------|
| 14 | Farfan-Portet et al, 2010 | 2001      | Individual | No  | 5,729,859 persons in Belgium and Britain                    | Welfare regimes           | Self-reported health                                           | Inconclusive |
| 15 | Fayissa, 2001             | 1993      | Ecological | Yes | 34 sub-Saharan African countries                            | Public health expenditure | Infant mortality, child mortality                              | Positive     |
| 16 | Grosse et al, 2010        | 2004      | Individual | No  | 38,122 persons from 24 European countries                   | Welfare regimes           | Perception of need for seeking primary health care             | Positive     |
| 17 | Karim, 2010               | 2003      | Ecological | Yes | 30 countries in Europe, North America, Australia and Asia   | Welfare regimes           | Infant mortality, life expectancy                              | Positive     |
| 18 | Klomp and de Haan, 2008   | 2000-2005 | Ecological | Yes | 101 low, middle and high income countries                   | Governance                | 19 mortality, disease, sickness indicators                     | Positive     |
| 19 | Lahelma and Arber, 1994   | 1985-1987 | Individual | No  | Ca. 30,000 persons from Britain, Finland, Norway and Sweden | Welfare regimes           | Limiting long-standing illness                                 | Negative     |
| 20 | Lundberg et al, 2008      | 1950-2000 | Ecological | Yes | 18 OECD countries                                           | Family policy models      | Infant mortality, mortality among those aged 30-59 and over 65 | Positive     |

|    |                          |           |            |     |                                                                 |                           |                                                                                              |              |
|----|--------------------------|-----------|------------|-----|-----------------------------------------------------------------|---------------------------|----------------------------------------------------------------------------------------------|--------------|
| 21 | Menon-Johansson, 2005    | 2002      | Ecological | Yes | 149 countries                                                   | Governance                | HIV prevalence                                                                               | Positive     |
| 22 | Muntaner et al, 2006     | 1980-1995 | Individual | Yes | Sweden, Italy, and England and Wales (combined)                 | Welfare regimes           | Mortality level per occupational class, population attributable risk, index of dissimilarity | Inconclusive |
| 23 | Nordenmark et al, 2006   | 1992-2001 | Individual | Yes | 3442 persons from Sweden, Ireland and Great Britain             | Unemployment benefit type | Psychological distress                                                                       | Positive     |
| 24 | Ouweneel, 2002           | 1980-1990 | Ecological | Yes | 42 'first-world, second-world and third-world' countries        | Social security system    | Self-rated health                                                                            | Inconclusive |
| 25 | Raphael and Bryant, 2004 | 1999      | Ecological | Yes | 5 countries (Canada, Denmark, Sweden, UK, US)                   | Welfare state spending    | Life expectancy                                                                              | Positive     |
| 26 | Rostila, 2007            | 2002-2003 | Individual | Yes | 36,489 persons in 20 European countries                         | Welfare regimes           | Self-rated health, life expectancy                                                           | Positive     |
| 27 | Sanders et al, 2009      | 1998-2002 | Individual | Yes | 12,888 persons in 4 countries (UK, Finland, Germany, Australia) | Welfare regimes           | Oral health                                                                                  | Positive     |

1  
2  
3  
4  
5  
6  
7  
8  
9  
10  
11  
12  
13  
14  
15  
16  
17  
18  
19  
20  
21  
22  
23  
24  
25  
26  
27  
28  
29  
30  
31  
32  
33  
34  
35  
36  
37  
38  
39  
40  
41  
42  
43  
44  
45  
46  
47

|                                |                              |           |            |     |                                                                |                           |                                                                          |              |
|--------------------------------|------------------------------|-----------|------------|-----|----------------------------------------------------------------|---------------------------|--------------------------------------------------------------------------|--------------|
| 28                             | Sekine et al, 2009           | 1991-2003 | Individual | No  | 17,801 persons in Britain, Finland and Japan                   | Welfare regimes           | The Short-Form 36: physical and mental health functioning                | Positive     |
| 29                             | Veenhoven and Ouweneel, 1995 | 1965-1985 | Ecological | Yes | Up to 97 rich and poor countries                               | Welfare state expenditure | Life expectancy                                                          | Positive     |
| 30                             | Veenhoven, 2000              | 1980-1990 | Ecological | Yes | 40 countries                                                   | Welfare state expenditure | Life expectancy, self-rated health                                       | Inconclusive |
| 31                             | Whitehead et al, 2000        | 1979-1996 | Individual | No  | 80,792 persons from Britain and Sweden                         | Social benefit system     | Self-perceived health, limiting longstanding illness                     | Inconclusive |
| 32                             | Zambon et al, 2006           | 2001-2002 | Individual | Yes | 160, 325 persons from 32 European and North American countries | Welfare regimes           | Self-reported health, well-being, health symptom load, health behaviours | Positive     |
| <b>Studies from our update</b> |                              |           |            |     |                                                                |                           |                                                                          |              |
| 33                             | Ades et al, 2013             | 2008-2012 | Ecological | Yes | 27 European Union countries                                    | Healthcare spending       | Cancer incidence and mortality                                           | Positive     |
| 34                             | Akinci et al, 2014           | 1990-2010 | Ecological | Yes | 19 Middle Eastern and North African countries                  | Healthcare spending       | Infant, under-5, and maternal mortality                                  | Positive     |

|    |                       |            |            |     |                                                    |                                                                                                  |                                                                                  |              |
|----|-----------------------|------------|------------|-----|----------------------------------------------------|--------------------------------------------------------------------------------------------------|----------------------------------------------------------------------------------|--------------|
| 35 | Bambra et al, 2014    | 2010       | Individual | Yes | 21,705 men and women from 27 European countries    | Welfare regime                                                                                   | Self-rated health                                                                | Inconclusive |
| 36 | Batniji et al, 2014   | 1980-2011  | Ecological | Yes | 22 Arab countries                                  | Governance                                                                                       | Mortality                                                                        | Positive     |
| 37 | Bentley et al, 2016   | 2001-2008  | Ecological | Yes | Australia and UK                                   | Housing benefit generosity                                                                       | Mental health                                                                    | Positive     |
| 38 | Bradley et al, 2011   | 2009       | Ecological | Yes | 30 OECD countries                                  | Healthcare spending, social care spending                                                        | Life expectancy, low birth weight, maternal mortality, potential life years lost | Positive     |
| 39 | Brandt and Hank, 2014 | Up to 2009 | Individual | No  | More than 13,000 people from 11 European countries | Welfare regimes                                                                                  | Self-rated health, job loss                                                      | Positive     |
| 40 | Bremberg, 2016        | 1990-2012  | Ecological | Yes | 28 OECD countries                                  | Family benefit spending, healthcare spending, government expenditure on research and development | Infant mortality                                                                 | Inconclusive |
| 41 | Copeland et al, 2015  | 1991-2010  | Individual | Yes | England (n = 217,514) and Sweden (n = 184,428)     | Welfare regimes                                                                                  | Self-rated health, health inequalities                                           | Positive     |

|    |                             |           |            |     |                                                       |                                                             |                                                                                                  |          |
|----|-----------------------------|-----------|------------|-----|-------------------------------------------------------|-------------------------------------------------------------|--------------------------------------------------------------------------------------------------|----------|
| 42 | Corsi and Subramanian, 2014 | 1990-2012 | Ecological | Yes | 35 sub-Saharan African countries                      | Maternal and child health service coverage                  | Under-5 mortality                                                                                | Positive |
| 43 | Craveiro, 2017              | 2010-2011 | Individual | Yes | 53,615 individuals from 15 European countries         | Welfare regimes                                             | Composite health measure derived from 3 indicators based on factor analysis, health inequalities | Positive |
| 44 | Dahl and van der Wel, 2013  | 2005      | Individual | Yes | Around 245,000 individuals from 18 European countries | National social expenditure                                 | Self-rated health, health inequalities                                                           | Positive |
| 45 | Deeming and Hayes, 2012     | 2000-2005 | Individual | Yes | Just under 30,000 individuals from OECD countries     | Welfare regimes                                             | Unhappiness                                                                                      | Positive |
| 46 | Devaux, 2015                | 2006-2009 | Individual | Yes | Participants from 18 OECD countries                   | Health care system                                          | Health inequalities                                                                              | Positive |
| 47 | Dragano et al, 2010         | 2004-2006 | Individual | Yes | 9917 older individuals from 12 European countries     | Welfare regimes, indicators from the EU Labour Force Survey | Depression (EURO-D and CES-D)                                                                    | Positive |

|    |                            |           |            |     |                                                       |                                                                                                     |                             |              |
|----|----------------------------|-----------|------------|-----|-------------------------------------------------------|-----------------------------------------------------------------------------------------------------|-----------------------------|--------------|
| 48 | Dujardin et al, 2011       | 2001      | Individual | Yes | 5729858 individuals from Belgium and Great Britain    | Home care policy system                                                                             | Health burden of care       | Positive     |
| 49 | Elgar et al, 2011          | 2006      | Individual | Yes | 48641 adults from 33 rich and middle-income countries | Healthcare spending                                                                                 | Homicide                    | Inconclusive |
| 50 | Engster and Stensöta, 2011 | 1995-2005 | Individual | Yes | Participants from 20 OECD countries                   | Family policy regime: family cash and tax benefits, paid parenting leave, public child care support | Child poverty and mortality | Positive     |
| 51 | Esmaeli et al, 2011        | 1996-2004 | Ecological | Yes | 24 Islamic countries                                  | Healthcare spending                                                                                 | Life expectancy             | Inconclusive |
| 52 | Esser and Palme, 2010      | 2002-2005 | Individual | Yes | 13 OECD countries                                     | Pension system                                                                                      | Self-rated health, WHO-5    | Positive     |
| 53 | Foubert et al, 2014        | 2002-2004 | Individual | Yes | 213764 individuals from 57 countries                  | Welfare regimes                                                                                     | Self-rated health           | Positive     |
| 54 | Fritzell et al, 2012       | 2000-2005 | Individual | No  | Randomly sampled British, Italian and Swedish mothers | Family policy model                                                                                 | Maternal health             | Negative     |
| 55 | Fritzell et al, 2013       | 1980-2005 | Ecological | Yes | Up to 25 countries per wave                           | Welfare regimes                                                                                     | Mortality                   | Positive     |

|    |                              |           |            |     |                                                    |                                               |                                                 |              |
|----|------------------------------|-----------|------------|-----|----------------------------------------------------|-----------------------------------------------|-------------------------------------------------|--------------|
| 56 | Gesthuizen et al, 2012       | 2002-2008 | Individual | Yes | Over 90,000 individuals from 32 European countries | Healthcare spending, modernised labour market | Self-rated health                               | Positive     |
| 57 | Gilligan and Skrepnek, 2015  | 1995-2010 | Ecological | Yes | 21 Eastern Mediterranean countries                 | Healthcare spending                           | Life expectancy                                 | Positive     |
| 58 | Glass et al, 2016            | 2006-2008 | Individual | Yes | 22 OECD countries                                  | Family policy                                 | Happiness                                       | Positive     |
| 59 | Granados, 2010               | 1950-2000 | Ecological | Yes | 8 European countries                               | Welfare regimes                               | Life expectancy, mortality, tobacco consumption | Inconclusive |
| 60 | Guarnizo-Herreño et al, 2013 | 2009      | Ecological | No  | 31 European countries                              | Welfare regimes                               | Oral health                                     | Positive     |
| 61 | Harding et al, 2013          | 1971-2006 | Ecological | No  | England and Wales, Italy and Finland               | Welfare regimes                               | Elder mortality                                 | Negative     |
| 62 | Hájek et al, 2012            | 1995-2008 | Ecological | Yes | 27 European Union countries                        | Healthcare spending                           | Life expectancy, standardised death rate        | Positive     |
| 63 | Hauck et al, 2016            | 1990-2012 | Ecological | Yes | 54 low-income studies                              | Healthcare spending                           | Life expectancy                                 | Inconclusive |
| 64 | Heijink et al, 2013          | 1996-2006 | Ecological | Yes | 14 Western countries                               | Healthcare spending                           | Avoidable mortality                             | Positive     |
| 65 | Hoffman, 2011                | 1980-2006 | Ecological | Yes | USA and Denmark                                    | Welfare system                                | Old-age mortality                               | Negative     |
| 66 | Kuovo and Räsänen, 2015      | 2010      | Individual | No  | 10,046 individuals from Finland, Britain,          | Welfare system                                | Subjective well-being                           | Positive     |

|    |                                       |           |            |     |                                                       |                                                   |                                           |              |
|----|---------------------------------------|-----------|------------|-----|-------------------------------------------------------|---------------------------------------------------|-------------------------------------------|--------------|
|    |                                       |           |            |     | Germany and Greece                                    |                                                   |                                           |              |
| 67 | Levecque et al, 2011                  | 2006-2007 | Individual | Yes | 41686 people from 23 European countries               | Welfare regimes, welfare state generosity         | Depression (CES-D)                        | Positive     |
| 68 | Levecque et al, 2015                  | 2006-2007 | Individual | No  | 37076 people from 20 European countries               | Migrant integration social policy                 | Depression (CES-D)                        | Inconclusive |
| 69 | Lin et al, 2014                       | 1996-2010 | Ecological | Yes | 149 countries                                         | Governance                                        | Child mortality                           | Positive     |
| 70 | López-Casasnovas and Soley-Bori, 2014 | 1980-2010 | Ecological | Yes | 32 OECD countries                                     | Healthcare and social spending, healthcare system | Health Human Development Index            | Positive     |
| 71 | McKinnon et al, 2016                  | 2006-2012 | Individual | Yes | Participants from 48 low- and middle-income countries | Maternal health service coverage                  | Neonatal mortality, health inequality     | Positive     |
| 72 | Maynard, 2016                         | 1985-2005 | Ecological | Yes | 74 developing countries                               | Healthcare spending                               | Tuberculosis mortality                    | Positive     |
| 73 | Miething et al, 2013                  | 2000      | Individual | Yes | 19353 individuals from Sweden, East and West Germany  | Welfare regimes                                   | Self-rated health                         | Inconclusive |
| 74 | Minagawa, 2013                        | 1990-2009 | Ecological | Yes | 23 Eastern European countries                         | Healthcare spending                               | Age-specific mortality, self-rated health | Positive     |



|    |                           |           |                            |     |                                               |                                                              |                                                              |          |
|----|---------------------------|-----------|----------------------------|-----|-----------------------------------------------|--------------------------------------------------------------|--------------------------------------------------------------|----------|
| 75 | Moor et al, 2013          | 1981-1999 | Ecological                 | Yes | 47 European countries and regions             | Welfare state generosity (Social Policy Indicators Database) | Life satisfaction                                            | Positive |
| 76 | Muldoon et al, 2011       | 2001-2008 | Ecological                 | No  | 136 United Nations countries                  | Healthcare spending                                          | Infant, child and maternal mortality                         | Positive |
| 77 | Muntaner et al, 2017      | 2003-2010 | Household-level ecological | Yes | 27 European Union countries                   | Welfare regimes                                              | Self-rated health, chronic conditions                        | Positive |
| 78 | Nelson and Fritzell, 2014 | 1990-2009 | Ecological                 | Yes | 18 countries                                  | Minimum income benefits                                      | Mortality (life expectancy and age-standardised death rates) | Positive |
| 79 | Novignon et al, 2012      | 1995-2010 | Ecological                 | Yes | 44 Sub-Saharan African countries              | Healthcare spending                                          | Life expectancy, death rate, infant mortality                | Positive |
| 80 | Olafsdottir, 2007         | 1998      | Individual                 | Yes | Participants from USA and Iceland             | Welfare regimes, healthcare spending                         | Self-rated physical health, health inequality                | Positive |
| 81 | Olsen and Dahl, 2007      | 2003      | Individual                 | Yes | 38,472 individuals from 21 European countries | Healthcare spending                                          | Self-rated health                                            | Positive |
| 82 | Palència et al, 2014      | 2010      | Individual                 | Yes | 23782 men and 28655 women from                | Gender equality policies                                     | Health inequality                                            | Positive |

|    |                             |           |            |     |                                         |                                                           |                                      |              |
|----|-----------------------------|-----------|------------|-----|-----------------------------------------|-----------------------------------------------------------|--------------------------------------|--------------|
|    |                             |           |            |     | 26 European countries                   |                                                           |                                      |              |
| 83 | Pickett and Wilkinson, 2007 | 1998-2006 | Ecological | Yes | 23 rich countries                       | Income equality                                           | Child wellbeing                      | Positive     |
| 84 | Pinzón-Flórez et al, 2015   | 2000-2010 | Ecological | Yes | 154 countries                           | Healthcare spending                                       | Child and maternal mortality         | Positive     |
| 85 | Platts, 2015                | 2000-2007 | Ecological | Yes | UK and Russia                           | Welfare regimes                                           | Self-rated health                    | Inconclusive |
| 86 | Ploubidis et al, 2012       | 2006-2007 | Individual | Yes | 33528 people from 14 European countries | Welfare regimes, income equality                          | Health in later life                 | Positive     |
| 87 | Popham et al, 2013          | 2006      | Ecological | No  | 37 countries                            | Welfare regimes                                           | Life expectancy                      | Positive     |
| 88 | Reeves et al, 2014          | 1995-2012 | Ecological | Yes | 21 European countries                   | Healthcare spending, social spending, pension expenditure | Tuberculosis control                 | Positive     |
| 89 | Richter et al, 2012         | 2006      | Individual | Yes | 141091 adolescents from 32 countries    | Welfare regimes                                           | Subjective health, health inequality | Positive     |
| 90 | Rovny, 2011                 | 1990-1999 | Ecological | Yes | 17 OECD countries                       | Family social policy                                      | Fertility                            | Positive     |
| 91 | Sacker et al, 2011          | 1995-2001 | Ecological | Yes | Britain, Germany, Denmark and USA       | Welfare regimes                                           | Self-rated health                    | Positive     |
| 92 | Sarti et al, 2013           | 2005      | Individual | Yes | Participants from                       | Welfare regimes                                           | Self-rated health, health inequality | Positive     |

1  
2  
3  
4  
5  
6  
7  
8  
9  
10  
11  
12  
13  
14  
15  
16  
17  
18  
19  
20  
21  
22  
23  
24  
25  
26  
27  
28  
29  
30  
31  
32  
33  
34  
35  
36  
37  
38  
39  
40  
41  
42  
43  
44  
45  
46  
47

|    |                            |            |            |     |                                                |                                                                                                       |                                                       |              |
|----|----------------------------|------------|------------|-----|------------------------------------------------|-------------------------------------------------------------------------------------------------------|-------------------------------------------------------|--------------|
|    |                            |            |            |     | European countries                             |                                                                                                       |                                                       |              |
| 93 | Shim, 2015                 | 1980-2010  | Ecological | Yes | 19 OECD countries                              | Social welfare expenditure                                                                            | Infant mortality                                      | Inconclusive |
| 94 | Stavrova et al, 2011       | 1999-2009  | Individual | Yes | Participants from 28 OECD countries            | Unemployment benefit policies                                                                         | Wellbeing among the unemployed                        | Inconclusive |
| 95 | Stuckler et al, 2010       | 1980-2005  | Ecological | Yes | Up to 18 European Union countries              | Social welfare spending                                                                               | All-cause mortality, cause-specific mortality         | Positive     |
| 96 | Van der Heuvel et al, 2013 | 1950-2000  | Ecological | Yes | Sweden, Netherlands, Canada, USA, Cuba         | Welfare regimes, Redistributive welfare policy                                                        | Infant mortality, low birth weight, under 5 mortality | Positive     |
| 97 | Van der Wel et al, 2011    | 2005       | Ecological | Yes | 26 European countries                          | Income equality, spending on active labour market policies, benefit generosity, employment protection | Social inequality in sickness                         | Positive     |
| 98 | Van Tuyckom, 2011          | Up to 2008 | Individual | Yes | 24,846 people from 27 European Union countries | Healthcare spending                                                                                   | Physical activity                                     | Positive     |

|     |                            |      |            |     |                                                           |                                                                   |                                        |              |
|-----|----------------------------|------|------------|-----|-----------------------------------------------------------|-------------------------------------------------------------------|----------------------------------------|--------------|
| 99  | Vahid Shahidi et al, 2016  | 2012 | Individual | Yes | 22123 individuals from 23 countries with a welfare state  | Welfare social policy                                             | Self-rated health of the unemployed    | Positive     |
| 100 | Vöörmann and Helemäe, 2013 | 2010 | Individual | Yes | 5480 individuals from 4 Eastern European countries        | Welfare regimes                                                   | Self-rated health, health inequalities | Inconclusive |
| 101 | Wu and Chiang, 2007        | 2002 | Ecological | Yes | Taiwan and 21 comparison industrialized countries         | Income inequality, healthcare spending, public social expenditure | Child mortality, under-five mortality  | Positive     |
| 102 | York and Bell, 2014        | 2005 | Ecological | Yes | Countries from the World Bank database with relevant data | Healthcare spending, gender equality policies                     | Self-reported life satisfaction (0-10) | Positive     |

1  
2  
3  
4  
5  
6  
7  
8  
9  
10  
11  
12  
13  
14  
15  
16  
17  
18  
19  
20  
21  
22  
23  
24  
25  
26  
27  
28  
29  
30  
31  
32  
33  
34  
35  
36  
37  
38  
39  
40  
41  
42  
43  
44  
45  
46  
47

**Supplementary file 8. Table of study-level characteristics and results for political tradition**

| Serial number                       | Authors, publication year   | Years of study | Level of analysis | Assessment of economic factors | Setting                                                 | Political exposures                                      | Population health outcomes                               | Result category |
|-------------------------------------|-----------------------------|----------------|-------------------|--------------------------------|---------------------------------------------------------|----------------------------------------------------------|----------------------------------------------------------|-----------------|
| <b>Studies from the 2010 review</b> |                             |                |                   |                                |                                                         |                                                          |                                                          |                 |
| 1                                   | Borrell et al, 2009         | 2000           | Individual        | Yes                            | 196,280 persons from 13 European countries              | Political tradition classification                       | Self-rated health                                        | Positive        |
| 2                                   | Cereseto and Waitzkin, 1986 | 1983-1984      | Ecological        | Yes                            | 123 countries, grouped by level of economic development | Political-economic system                                | Physical quality of life index                           | Positive        |
| 3                                   | Chung and Muntaner, 2006    | 1960-1994      | Ecological        | Yes                            | 19 OECD countries                                       | Voter partisanship                                       | Low birth weight, infant mortality, under-five mortality | Positive        |
| 4                                   | Correa and Namkoong, 1992   | 1980           | Ecological        | Yes                            | 116 countries with a population over 1 million          | Political conditions; political tradition classification | Life expectancy, mortality                               | Positive        |

|    |                           |           |            |     |                                                |                                                                             |                                                                                             |          |
|----|---------------------------|-----------|------------|-----|------------------------------------------------|-----------------------------------------------------------------------------|---------------------------------------------------------------------------------------------|----------|
| 5  | Espelt et al, 2008        | 2004      | Individual | Yes | 16,901 persons in 9 European countries         | Political tradition classification                                          | Self-reported health, long-term illness                                                     | Positive |
| 6  | Lena and London, 1993     | 1983      | Ecological | Yes | Up to 84 peripheral and non-core nations       | Political tradition classification                                          | Infant mortality, child mortality, life expectancy                                          | Positive |
| 7  | London and Williams, 1990 | 1965-1970 | Ecological | Yes | Up to 110 periphery and semi-periphery nations | Political tradition classification                                          | Infant mortality, life expectancy                                                           | Positive |
| 8  | Moon and Dixon, 1985      | 1970-1975 | Ecological | Yes | 116 nations                                    | Political ideology (left, right, centre)                                    | Physical Quality of Life Index: life expectancy, infant mortality                           | Positive |
| 9  | Muntaner et al, 2002      | 1989-1992 | Ecological | Yes | 16 wealthy countries                           | Working class power, voter partisanship, time in power by different parties | Life expectancy, self-rated health, low birth weight, and age- and cause-specific mortality | Positive |
| 10 | Navarro et al, 2003       | 1950-1998 | Ecological | Yes | 17 OECD countries                              | Working class power, voter partisanship                                     | Infant mortality, life expectancy, health inequalities                                      | Positive |
| 11 | Navarro and Shi, 2001     | 1960-1996 | Ecological | Yes | 18 OECD countries                              | Political tradition classification,                                         | Infant mortality,                                                                           | Positive |

1  
2  
3  
4  
5  
6  
7  
8  
9  
10  
11  
12  
13  
14  
15  
16  
17  
18  
19  
20  
21  
22  
23  
24  
25  
26  
27  
28  
29  
30  
31  
32  
33  
34  
35  
36  
37  
38  
39  
40  
41  
42  
43  
44  
45  
46  
47

|                                |                            |           |            |     |                                  |                                                                                      |                                                   |              |
|--------------------------------|----------------------------|-----------|------------|-----|----------------------------------|--------------------------------------------------------------------------------------|---------------------------------------------------|--------------|
|                                |                            |           |            |     |                                  | working class power                                                                  | health inequalities                               |              |
| 12                             | Navarro et al, 2006        | 1972-1996 | Ecological | Yes | 17 OECD countries                | Voter partisanship, time in power by different parties                               | Infant mortality, life expectancy                 | Positive     |
| <b>Studies from our update</b> |                            |           |            |     |                                  |                                                                                      |                                                   |              |
| 13                             | Bosdriesz et al, 2015      | 1996-2010 | Ecological | Yes | 11 European Union countries      | Percentage of seats held by social democratic, socialist and other left-wing parties | Tobacco Control Scale                             | Positive     |
| 14                             | Granados, 2010             | 1950-2000 | Ecological | Yes | 8 European countries             | Political tradition classification                                                   | Life expectancy, mortality, tobacco consumption   | Inconclusive |
| 15                             | Huijts et al, 2010         | 2002-2006 | Individual | Yes | 29 European countries and Israel | Political tradition classification                                                   | Self-rated health                                 | Positive     |
| 16                             | Lin et al, 2012            | 1970-2004 | Ecological | Yes | 119 less developed countries     | Political regime score from Polity IV                                                | Life expectancy                                   | Positive     |
| 17                             | Mackenbach and McKee, 2013 | 1990-2009 | Ecological | Yes | 43 European countries            | Left-wing participation in government (share of seats)                               | Success in implementing effective health policies | Inconclusive |

Supplementary file 9. Table of study-level characteristics and results for democracy

| Serial number                   | Authors, publication year  | Years of study | Level of analysis | Setting                                        | Assessment of economic factors | Political exposures                               | Population health outcomes                                                      | Result category |
|---------------------------------|----------------------------|----------------|-------------------|------------------------------------------------|--------------------------------|---------------------------------------------------|---------------------------------------------------------------------------------|-----------------|
| <b>Studies from 2010 review</b> |                            |                |                   |                                                |                                |                                                   |                                                                                 |                 |
| 1                               | Adeyi, 1997                | 1989-1993      | Ecological        | 10 former Communist countries                  | No                             | Transition from Communism to capitalist democracy | Life expectancy, infant mortality, probability of dying between 15 and 65 years | Negative        |
| 2                               | Alvarez-Dardet, 2006       | 2000           | Ecological        | 23 former Communist countries                  | Yes                            | Democratic deficit                                | Life expectancy, infant mortality, maternal mortality                           | Positive        |
| 3                               | Baum and Lake, 2003        | 1967-1997      | Ecological        | 128 poor and non-poor countries                | Yes                            | Democracy (Polity III)                            | Female life expectancy                                                          | Positive        |
| 4                               | Besley and Kudamatsu, 2006 | 1962-2002      | Ecological        | Up to 160 countries transitioning to democracy | Yes                            | Democracy (Polity IV)                             | Life expectancy, infant mortality                                               | Positive        |



|    |                            |           |            |                                                           |     |                                                        |                                                                 |              |
|----|----------------------------|-----------|------------|-----------------------------------------------------------|-----|--------------------------------------------------------|-----------------------------------------------------------------|--------------|
| 5  | Franco, 2004               | 1998      | Ecological | 170 high, medium and low-income countries                 | Yes | Democracy (Freedom House)                              | Life expectancy, infant mortality, maternal mortality           | Positive     |
| 6  | Frey and Al-Roumi, 1999    | 1970-1990 | Ecological | 87 developed and less-developed countries                 | No  | Democracy (political rights index and civil liberties) | Infant mortality, life expectancy                               | Positive     |
| 7  | Gauri and Khaleghian, 2002 | 1989-1997 | Ecological | 208 low and middle-income countries                       | Yes | Democracy (Polity IV)                                  | Vaccine coverage for diphtheria, tetanus, pertussis and measles | Negative     |
| 8  | Ghobareh et al, 2004       | 2000      | Ecological | 179 countries in WHO                                      | Yes | Democracy (Polity IV, Freedom House)                   | Health-adjusted life expectancy                                 | Positive     |
| 9  | Gizeles, 2009              | 1982-2000 | Ecological | 117 developed and developing countries                    | Yes | Democracy (Polity IV), state capacity                  | AIDS infection rate                                             | Positive     |
| 10 | Houweling et al, 2005      | 1999      | Ecological | 43 developing countries in Asia, Africa and Latin America | Yes | Democracy (political rights index)                     | Under five mortality rate                                       | Inconclusive |
| 11 | Kick et al, 1990           | 1970-1985 | Ecological | 63 developing countries                                   | Yes | Political democracy (political rights index)           | Infant mortality                                                | Positive     |

|    |                           |           |            |                                                      |     |                                                                                               |                                                                   |              |
|----|---------------------------|-----------|------------|------------------------------------------------------|-----|-----------------------------------------------------------------------------------------------|-------------------------------------------------------------------|--------------|
| 12 | Klomp and de Haan, 2009   | 2000-2005 | Ecological | 171 countries with a population greater than 200,000 | Yes | Decree of democracy, political stability                                                      | 19 national health indicators                                     | Positive     |
| 13 | Lake and Baum, 2001       | 1970-1992 | Ecological | Up to 110 developed countries                        | No  | Democracy (Polity III)                                                                        | Life expectancy, infant mortality                                 | Positive     |
| 14 | Lena and London; 1993     | 1983      | Ecological | Up to 84 peripheral and non-core nations             | Yes | Level of democracy                                                                            | Infant mortality, child mortality, life expectancy                | Positive     |
| 15 | London and Williams; 1990 | 1965-1970 | Ecological | Up to 110 periphery and semi-periphery nations       | Yes | Level of political democracy                                                                  | Infant mortality, life expectancy                                 | Positive     |
| 16 | Moon and Dixon, 1985      | 1970-1975 | Ecological | 116 nations                                          | Yes | Level of political democracy, political stability                                             | Physical Quality of Life Index: life expectancy, infant mortality | Positive     |
| 17 | Navia and Zweifel, 2003   | 1990-1997 | Ecological | 188 democratic or dictatorial countries              | Yes | Democracy (yes or no, based on presence of elections)                                         | Fertility, child survival                                         | Positive     |
| 18 | Pillai and Gupta, 2006    | 2001      | Ecological | 129 developing countries                             | No  | Democracy (human rights rating, political rights, and civil liberty, political terror scales) | 10 global monitoring indicators of women's reproductive health    | Positive     |
| 19 | Ross, 2006                | 1970-2000 | Ecological | 168 countries with a population                      | Yes | Democracy (Polity IV), years of                                                               | Child mortality, infant mortality                                 | Inconclusive |

1  
2  
3  
4  
5  
6  
7  
8  
9  
10  
11  
12  
13  
14  
15  
16  
17  
18  
19  
20  
21  
22  
23  
24  
25  
26  
27  
28  
29  
30  
31  
32  
33  
34  
35  
36  
37  
38  
39  
40  
41  
42  
43  
44  
45  
46  
47

|    |                         |           |            |                                                     |     |                                                    |                                                                               |              |
|----|-------------------------|-----------|------------|-----------------------------------------------------|-----|----------------------------------------------------|-------------------------------------------------------------------------------|--------------|
|    |                         |           |            | greater than 200,000                                |     | democracy since 1900                               |                                                                               |              |
| 20 | Rudra and Haggard, 2005 | 1975-1997 | Ecological | 57 less developed countries                         | Yes | Democracy (Polity IV)                              | Infant mortality                                                              | Positive     |
| 21 | Safaei, 2006            | 2003      | Ecological | 118 autocratic, incoherent and democratic countries | Yes | Democracy (Polity IV)                              | Life expectancy, mortality rate, child mortality rate                         | Positive     |
| 22 | Shandra et al, 2004     | 1980-1997 | Ecological | 59 developing countries                             | Yes | Level of political democracy                       | Infant mortality                                                              | Positive     |
| 23 | Shandra et al, 2010     | 1990-2005 | Ecological | 74 low income countries                             | Yes | Democracy (Polity IV)                              | Infant mortality                                                              | Positive     |
| 24 | Stroup, 2007            | 1980-2000 | Ecological | Up to 105 countries                                 | Yes | Political Rights Index (Freedom House)             | Life expectancy, child mortality                                              | Positive     |
| 25 | Tsai, 2006              | 1975-1998 | Ecological | 119 developing countries                            | Yes | Democracy (majority rule and political contention) | Life expectancy, infant mortality under one year, infant mortality under five | Inconclusive |
| 26 | Wejnert, 2008           | 1970-2005 | Ecological | 58 core and peripheral countries                    | Yes | Democracy (Polity IV)                              | Maternal care, fertility rate, maternal mortality, women life expectancy      | Inconclusive |
| 27 | Zweifel and Navia, 2000 | 1950-1990 | Ecological | 138 democratic or                                   | Yes | Democracy (yes or no, defined)                     | Infant mortality                                                              | Positive     |

|                                |                             |               |            | dictatorial countries                           |     | by presence of elections)                    |                                        |              |
|--------------------------------|-----------------------------|---------------|------------|-------------------------------------------------|-----|----------------------------------------------|----------------------------------------|--------------|
| <b>Studies from our update</b> |                             |               |            |                                                 |     |                                              |                                        |              |
| 28                             | Batniji et al, 2014         | 1980-2011     | Ecological | 22 Arab countries                               | Yes | Extent of democracy                          | Mortality                              | Inconclusive |
| 29                             | Burroway, 2016              | 1995-2008     | Individual | 52 developing countries                         | Yes | Democracy (Polity IV)                        | Child diarrhoea and malnutrition       | Inconclusive |
| 30                             | Chuang et al, 2013          | 1980-2009     | Ecological | 46 less-developed countries                     | Yes | Democracy (Polity IV)                        | Infant mortality                       | Positive     |
| 31                             | Chuang et al, 2013          | 1980-2009     | Ecological | 46 less-developed countries                     | Yes | Democracy (Polity IV)                        | Under-5 mortality                      | Inconclusive |
| 32                             | Dietrich and Bernhard, 2015 | 1980s to 2012 | Ecological | 88 countries that were not OECD members in 1984 | Yes | Democracy (Polity IV)                        | Infant mortality, basic nutrition      | Inconclusive |
| 33                             | Doherty and Kelly, 2010     | Not stated    | Individual | 30,816 individuals from 17 European countries   | Yes | Satisfaction with democracy on 0-10 scale    | Self-reported happiness on 0-10 scales | Positive     |
| 34                             | Fumagalli et al, 2013       | 1990-2007     | Ecological | 47 developing countries                         | Yes | Democracy (Polity IV), political competition | BMI                                    | Positive     |
| 35                             | Hauck et al, 2012           | 1990-2012     | Ecological | 54 low-income studies                           | Yes | Democracy (Polity IV)                        | Life expectancy                        | Positive     |
| 36                             | Klenk et al, 2016           | 1950-2010     | Ecological | 64 countries from WHO                           | Yes | Democratization                              | Mortality                              | Positive     |

1  
2  
3  
4  
5  
6  
7  
8  
9  
10  
11  
12  
13  
14  
15  
16  
17  
18  
19  
20  
21  
22  
23  
24  
25  
26  
27  
28  
29  
30  
31  
32  
33  
34  
35  
36  
37  
38  
39  
40  
41  
42  
43  
44  
45  
46  
47

|    |                            |                                  |                     |                                        |     |                                                                   |                                                   |          |
|----|----------------------------|----------------------------------|---------------------|----------------------------------------|-----|-------------------------------------------------------------------|---------------------------------------------------|----------|
|    |                            |                                  |                     | mortality database                     |     |                                                                   |                                                   |          |
| 37 | Krueger et al, 2015        | 2002-2004                        | Individual          | 313,554 individuals from 67 countries  | Yes | Democracy variable resulting from factor analysis of 7 indicators | Self-rated health                                 | Positive |
| 38 | Kudamatsu, 2012            | Up to 2004                       | Ecological          | Sub-Saharan African countries          | Yes | Democratization                                                   | Infant mortality                                  | Positive |
| 39 | Mackenbach, 2013           | 1900-2008                        | Ecological          | European countries                     | No  | Democracy (binary)                                                | Life expectancy                                   | Positive |
| 40 | Mackenbach et al, 2013     | 1960-2008                        | Ecological          | European countries                     | Yes | Democratization                                                   | Life expectancy                                   | Positive |
| 41 | Mackenbach and McKee, 2013 | 1990-2009                        | Ecological          | 43 European countries                  | Yes | Democracy (+10 to -10)                                            | Success in implementing effective health policies | Positive |
| 42 | Maynard, 2016              | 1985-2005                        | Ecological analysis | 74 developing countries                | Yes | Democracy (Freedom House)                                         | Tuberculosis mortality                            | Positive |
| 43 | Minagawa, 2013             | 1990-2009                        | Ecological analysis | 23 Eastern European countries          | Yes | Freedom (Freedom House, Heritage Foundation)                      | Age-specific mortality, self-rated health         | Positive |
| 44 | Witvliet et al, 2013       | From 2000, end date not reported | Individual          | 72524 adults from 20 African countries | Yes | Transparency and freedom from corruption                          | Self-rated health                                 | Positive |

Supplementary file 10. Table of study-level characteristics and results for globalisation

| Serial number | Authors, publication year | Years of study | Level of analysis | Setting                                          | Political exposures                                                                                      | Population health outcomes | Result category |
|---------------|---------------------------|----------------|-------------------|--------------------------------------------------|----------------------------------------------------------------------------------------------------------|----------------------------|-----------------|
| 1             | Moore et al, 2006         | 2000           | Ecological        | 128 countries divided into 6 world-system blocks | National trade, world-system role                                                                        | Infant mortality           | Positive        |
| 2             | Shandra et al, 2004       | 1980-1997      | Ecological        | 59 developing countries                          | Commodity concentration, multinational corporate penetration, international monetary fund conditionality | Infant mortality           | Negative        |
| 3             | Shen and Williamson, 2001 | 1965-1991      | Ecological        | 82 less developed countries                      | Foreign trade, foreign investment, debt increase                                                         | Infant mortality           | Negative        |
| 4             | Shen and Williamson, 1997 | 1960-1991      | Ecological        | 86 less developed countries                      | Foreign investment, debt dependency                                                                      | Child survival probability | Negative        |

1  
2  
3  
4  
5  
6  
7  
8  
9  
10  
11  
12  
13  
14  
15  
16  
17  
18  
19  
20  
21  
22  
23  
24  
25  
26  
27  
28  
29  
30  
31  
32  
33  
34  
35  
36  
37  
38  
39  
40  
41  
42  
43  
44  
45  
46

| Studies from our update |                                |            |            |                                             |                                                                                                                                       |                                    |              |
|-------------------------|--------------------------------|------------|------------|---------------------------------------------|---------------------------------------------------------------------------------------------------------------------------------------|------------------------------------|--------------|
| 5                       | Bergh and Nilsson, 2010        | 1970-2005  | Ecological | 92 high-, middle- and low-income countries  | KOF index                                                                                                                             | Life expectancy                    | Positive     |
| 6                       | Bozorgmehr and Sebastian, 2014 | 1990-2010  | Ecological | 22 high-burden tuberculosis countries       | World Trade Organization membership status and duration, trade as a percentage of GDP, Economic Freedom of the World Index, KOF Index | Tuberculosis incidence             | Inconclusive |
| 7                       | Chuang et al, 2013             | 1980-2009  | Ecological | 46 less-developed countries                 | Debt, foreign investment                                                                                                              | Infant mortality                   | Inconclusive |
| 8                       | Chuang et al, 2013             | 1980-2009  | Ecological | 46 less-developed countries                 | Debt, foreign investment                                                                                                              | Under-5 mortality                  | Inconclusive |
| 9                       | Costa Font and Mas, 2016       | 1989-2005  | Ecological | 26 countries                                | KOF Index, CSGR Index                                                                                                                 | Obesity prevalence, caloric intake | Negative     |
| 10                      | Cross et al, 2009              | Not stated | Individual | UK, Spain, Kenya and Uganda                 | Localised or globalised food supply system                                                                                            | Health-related quality of life     | Positive     |
| 11                      | De Vogli et al, 2014           | 1980-2008  | Ecological | 127 low-, middle- and high-income countries | KOF Index                                                                                                                             | BMI                                | Negative     |

|    |                            |            |                            |                                   |                                                                                                                                       |                                                                                                                                                                                                                    |          |
|----|----------------------------|------------|----------------------------|-----------------------------------|---------------------------------------------------------------------------------------------------------------------------------------|--------------------------------------------------------------------------------------------------------------------------------------------------------------------------------------------------------------------|----------|
| 12 | Estimé et al, 2014         | 2005-2010  | Household-level ecological | Pacific nations                   | Food imports                                                                                                                          | Obesity                                                                                                                                                                                                            | Negative |
| 13 | Fan and Faioso Le'au, 2015 | Up to 2014 | Ecological                 | Independent and American Samoa    | Westernisation                                                                                                                        | Life expectancy, neonatal and child mortality, measles immunisation, diabetes mortality, cancer mortality, cerebrovascular disease mortality, heart disease mortality, pneumonia mortality, overweight and obesity | Negative |
| 14 | Gerring and Thacker, 2008  | 1960-1999  | Ecological                 | All countries with available data | Open international trade policies, low-inflation macroeconomic environments, market-oriented property rights, GATT and WTO membership | Infant mortality                                                                                                                                                                                                   | Positive |
| 15 | Goryakin et al, 2015       | 1991-2009  | Individual                 | Up to 887,00 women in 56          | KOF Index                                                                                                                             | Overweight and obesity                                                                                                                                                                                             | Negative |



|    |                          |            |            |                                           |                                                                           |                                                                                |              |
|----|--------------------------|------------|------------|-------------------------------------------|---------------------------------------------------------------------------|--------------------------------------------------------------------------------|--------------|
|    |                          |            |            | low- and middle-income countries          |                                                                           |                                                                                |              |
| 16 | Hauck et al, 2012        | 1990-2012  | Ecological | 54 low-income studies                     | Terms of international trade, foreign investment, debt service and relief | Life expectancy                                                                | Inconclusive |
| 17 | Jolly et al, 2013        | 2002       | Ecological | 27 Latin American and Caribbean countries | Net food import                                                           | Obesity                                                                        | Negative     |
| 18 | Jorgenson, 2009          | 1980-2000  | Ecological | Less-developed countries                  | Foreign direct investment                                                 | Water pollution                                                                | Negative     |
| 19 | Jorgenson, 2009          | 1980-2000  | Ecological | Less-developed countries                  | Foreign direct investment, export intensity                               | Water pollution                                                                | Negative     |
| 20 | Levine and Rothman, 2006 | Up to 1990 | Ecological | Up to 130 countries                       | Economic openness                                                         | Infant mortality, under-5 mortality, anthropometric measures of child stunting | Inconclusive |
| 21 | Martens et al, 2010      | Up to 2008 | Ecological | Global, subject to data availability      | Maastricht Globalization Index                                            | Infant mortality, under-5 mortality, adult mortality                           | Positive     |
| 22 | Maynard, 2015            | 2000-2010  | Ecological | Up to 85 low- and middle-                 | IGTA membership and status,                                               | Youth smoking rates (Global Youth Tobacco Survey)                              | Negative     |

1  
2  
3  
4  
5  
6  
7  
8  
9  
10  
11  
12  
13  
14  
15  
16  
17  
18  
19  
20  
21  
22  
23  
24  
25  
26  
27  
28  
29  
30  
31  
32  
33  
34  
35  
36  
37  
38  
39  
40  
41  
42  
43  
44  
45  
46

|    |                               |            |            |                                  |                                               |                                                    |              |
|----|-------------------------------|------------|------------|----------------------------------|-----------------------------------------------|----------------------------------------------------|--------------|
|    |                               |            |            | income countries                 | trade, imports, exports                       |                                                    |              |
| 23 | Maynard, 2016                 | 1985-2005  | Ecological | 74 developing countries          | Debt, trade dependency                        | Tuberculosis mortality                             | Inconclusive |
| 24 | Milner et al, 2011            | 1980-2006  | Ecological | 35 countries                     | A globalisation index developed for the study | Suicide rate                                       | Negative     |
| 25 | Mukherjee and Kriekhaus, 2011 | 1970-2007  | Ecological | 132 countries                    | Economic, political and social globalisation  | Infant mortality, life expectancy, child mortality | Positive     |
| 26 | Oberlander et al, 2017        | 1970-2011  | Ecological | 70 countries                     | Social globalisation, trade openness          | Nutritional health                                 | Inconclusive |
| 27 | Oster, 2010                   | Up to 2007 | Ecological | UN countries with available data | Export activity                               | HIV                                                | Negative     |
| 28 | Owen and Wu, 2007             | 1960-1995  | Ecological | 219 countries                    | Openness to trade                             | Life expectancy, infant mortality                  | Positive     |



# PRISMA 2009 Checklist

| Section/topic                      | #  | Checklist item                                                                                                                                                                                                                                                                                              | Reported on page #       |
|------------------------------------|----|-------------------------------------------------------------------------------------------------------------------------------------------------------------------------------------------------------------------------------------------------------------------------------------------------------------|--------------------------|
| <b>TITLE</b>                       |    |                                                                                                                                                                                                                                                                                                             |                          |
| Title                              | 1  | Identify the report as a systematic review, meta-analysis, or both.                                                                                                                                                                                                                                         | 1                        |
| <b>ABSTRACT</b>                    |    |                                                                                                                                                                                                                                                                                                             |                          |
| Structured summary                 | 2  | Provide a structured summary including, as applicable: background; objectives; data sources; study eligibility criteria, participants, and interventions; study appraisal and synthesis methods; results; limitations; conclusions and implications of key findings; systematic review registration number. | 2                        |
| <b>INTRODUCTION</b>                |    |                                                                                                                                                                                                                                                                                                             |                          |
| Rationale                          | 3  | Describe the rationale for the review in the context of what is already known.                                                                                                                                                                                                                              | 4-5                      |
| Objectives                         | 4  | Provide an explicit statement of questions being addressed with reference to participants, interventions, comparisons, outcomes, and study design (PICOS).                                                                                                                                                  | 5                        |
| <b>METHODS</b>                     |    |                                                                                                                                                                                                                                                                                                             |                          |
| Protocol and registration          | 5  | Indicate if a review protocol exists, if and where it can be accessed (e.g., Web address), and, if available, provide registration information including registration number.                                                                                                                               | NA                       |
| Eligibility criteria               | 6  | Specify study characteristics (e.g., PICOS, length of follow-up) and report characteristics (e.g., years considered, language, publication status) used as criteria for eligibility, giving rationale.                                                                                                      | 6                        |
| Information sources                | 7  | Describe all information sources (e.g., databases with dates of coverage, contact with study authors to identify additional studies) in the search and date last searched.                                                                                                                                  | 6                        |
| Search                             | 8  | Present full electronic search strategy for at least one database, including any limits used, such that it could be repeated.                                                                                                                                                                               | Table 1                  |
| Study selection                    | 9  | State the process for selecting studies (i.e., screening, eligibility, included in systematic review, and, if applicable, included in the meta-analysis).                                                                                                                                                   | 5-7                      |
| Data collection process            | 10 | Describe method of data extraction from reports (e.g., piloted forms, independently, in duplicate) and any processes for obtaining and confirming data from investigators.                                                                                                                                  | 7                        |
| Data items                         | 11 | List and define all variables for which data were sought (e.g., PICOS, funding sources) and any assumptions and simplifications made.                                                                                                                                                                       | 7                        |
| Risk of bias in individual studies | 12 | Describe methods used for assessing risk of bias of individual studies (including specification of whether this was done at the study or outcome level), and how this information is to be used in any data synthesis.                                                                                      | 7                        |
| Summary measures                   | 13 | State the principal summary measures (e.g., risk ratio, difference in means).                                                                                                                                                                                                                               | 7, but not meta-analysis |



# PRISMA 2009 Checklist

|                      |    |                                                                                                                                                           |                         |
|----------------------|----|-----------------------------------------------------------------------------------------------------------------------------------------------------------|-------------------------|
| Synthesis of results | 14 | Describe the methods of handling data and combining results of studies, if done, including measures of consistency (e.g., $I^2$ ) for each meta-analysis. | 7, but no meta-analysis |
|----------------------|----|-----------------------------------------------------------------------------------------------------------------------------------------------------------|-------------------------|

Page 1 of 2

| Section/topic                 | #  | Checklist item                                                                                                                                                                                           | Reported on page #                  |
|-------------------------------|----|----------------------------------------------------------------------------------------------------------------------------------------------------------------------------------------------------------|-------------------------------------|
| Risk of bias across studies   | 15 | Specify any assessment of risk of bias that may affect the cumulative evidence (e.g., publication bias, selective reporting within studies).                                                             | NA, no meta-analysis                |
| Additional analyses           | 16 | Describe methods of additional analyses (e.g., sensitivity or subgroup analyses, meta-regression), if done, indicating which were pre-specified.                                                         | NA, no meta-analysis                |
| <b>RESULTS</b>                |    |                                                                                                                                                                                                          |                                     |
| Study selection               | 17 | Give numbers of studies screened, assessed for eligibility, and included in the review, with reasons for exclusions at each stage, ideally with a flow diagram.                                          | 7-8, Figure 2, Supplementary file 1 |
| Study characteristics         | 18 | For each study, present characteristics for which data were extracted (e.g., study size, PICOS, follow-up period) and provide the citations.                                                             | Tables 2-5                          |
| Risk of bias within studies   | 19 | Present data on risk of bias of each study and, if available, any outcome level assessment (see item 12).                                                                                                | 8, Supplementary file 3             |
| Results of individual studies | 20 | For all outcomes considered (benefits or harms), present, for each study: (a) simple summary data for each intervention group (b) effect estimates and confidence intervals, ideally with a forest plot. | Tables 2-5, no meta-analysis        |
| Synthesis of results          | 21 | Present results of each meta-analysis done, including confidence intervals and measures of consistency.                                                                                                  | NA, no meta-analysis                |
| Risk of bias across studies   | 22 | Present results of any assessment of risk of bias across studies (see Item 15).                                                                                                                          | NA, no meta-analysis                |
| Additional analysis           | 23 | Give results of additional analyses, if done (e.g., sensitivity or subgroup analyses, meta-regression [see Item 16]).                                                                                    | NA, no meta-analysis                |
| <b>DISCUSSION</b>             |    |                                                                                                                                                                                                          |                                     |
| Summary of evidence           | 24 | Summarize the main findings including the strength of evidence for each main outcome; consider their relevance to key groups (e.g., healthcare providers, users, and policy makers).                     | 10                                  |
| Limitations                   | 25 | Discuss limitations at study and outcome level (e.g., risk of bias), and at review-level (e.g., incomplete retrieval of identified research, reporting bias).                                            | 11-12                               |



# PRISMA 2009 Checklist

1  
2  
3  
4  
5  
6  
7  
8  
9  
10  
11  
12  
13  
14  
15  
16  
17  
18  
19  
20  
21  
22  
23  
24  
25  
26  
27  
28  
29  
30  
31  
32  
33  
34  
35  
36  
37  
38  
39  
40  
41  
42  
43  
44  
45  
46  
47

|                |    |                                                                                                                                            |       |
|----------------|----|--------------------------------------------------------------------------------------------------------------------------------------------|-------|
| Conclusions    | 26 | Provide a general interpretation of the results in the context of other evidence, and implications for future research.                    | 13-15 |
| <b>FUNDING</b> |    |                                                                                                                                            |       |
| Funding        | 27 | Describe sources of funding for the systematic review and other support (e.g., supply of data); role of funders for the systematic review. | 15    |

From: Moher D, Liberati A, Tetzlaff J, Altman DG, The PRISMA Group (2009). Preferred Reporting Items for Systematic Reviews and Meta-Analyses: The PRISMA Statement. PLoS Med 6(7): e1000097. doi:10.1371/journal.pmed1000097

For more information, visit: [www.prisma-statement.org](http://www.prisma-statement.org).

For peer review only

# BMJ Open

## How much evidence is there that political factors are related to population health outcomes? An internationally comparative systematic review

|                                 |                                                                                                                                                                                                                                                         |
|---------------------------------|---------------------------------------------------------------------------------------------------------------------------------------------------------------------------------------------------------------------------------------------------------|
| Journal:                        | <i>BMJ Open</i>                                                                                                                                                                                                                                         |
| Manuscript ID                   | bmjopen-2017-020886.R3                                                                                                                                                                                                                                  |
| Article Type:                   | Research                                                                                                                                                                                                                                                |
| Date Submitted by the Author:   | 20-Aug-2018                                                                                                                                                                                                                                             |
| Complete List of Authors:       | Barnish, Max; University of Exeter, Exeter Medical School<br>Tørnes, Michelle; University of Aberdeen Institute of Applied Health Sciences, Ageing Clinical and Experimental Research (ACER)<br>Horne, Becky ; Independent scholar, Independent scholar |
| <b>Primary Subject Heading</b>: | Health policy                                                                                                                                                                                                                                           |
| Secondary Subject Heading:      | Public health                                                                                                                                                                                                                                           |
| Keywords:                       | PUBLIC HEALTH, Health policy < HEALTH SERVICES ADMINISTRATION & MANAGEMENT, Political determinants of health, SOCIAL MEDICINE                                                                                                                           |
|                                 |                                                                                                                                                                                                                                                         |

SCHOLARONE™  
Manuscripts

1

2  
3 **How much evidence is there that political factors are related to population health**  
4 **outcomes? An internationally comparative systematic review**

5 Max Barnish,<sup>1</sup> Michelle Tørnes,<sup>2</sup> and Becky Nelson-Horne<sup>3</sup>

6  
7 1 = Institute of Health Research, Exeter Medical School, University of Exeter, Exeter, UK

8  
9 2 = Ageing Clinical and Experimental Research (ACER), School of Medicine, Medical  
10 Sciences and Nutrition, University of Aberdeen, Aberdeen, UK

11  
12 3 = Independent Scholar, Glasgow, UK

13 Correspondence to: m.s.barnish@exeter.ac.uk (Dr M. Barnish)

14  
15  
16  
17  
18  
19  
20  
21  
22  
23  
24  
25  
26  
27  
28  
29  
30  
31  
32  
33  
34  
35  
36  
37  
38  
39  
40  
41  
42  
43  
44  
45  
46  
47  
48  
49  
50  
51  
52  
53  
54  
55  
56  
57  
58  
59  
60

For peer review only

2

**ABSTRACT**

**Objectives:** To provide a seven-year update of the most recent systematic review about the relationships between political features and population health outcomes.

**Setting:** Internationally comparative scholarly literature.

**Data sources:** Ten scholarly bibliographic databases plus supplementary searches in bibliographies and Google Scholar were used to update a previous systematic review. The final search was conducted in November 2017.

**Primary and secondary outcome measures:** Any population health outcome measure, apart from healthcare spending.

**Results:** 73 unique publications were identified from the previous systematic review. The database searches to update the literature identified 45,356 raw records with 35,207 remaining following deduplication. 55 publications were identified from supplementary searches. In total, 258 publications proceeded to full-text review and 176 were included in narrative synthesis. Eighty-five studies were assessed at low risk of bias, 89 at moderate risk of bias and none at high risk of bias. Assessment could not be conducted for 2 studies with only book chapters. No meta-analysis was conducted. 102 studies assessed welfare state generosity and 79 found a positive association. 17 studies assessed political tradition and 15 found a positive association with left-of-centre tradition. 44 studies assessed democracy and 34 found a positive association. 28 studies assessed globalisation and 14 found a negative association, while 7 were positive and 7 inconclusive.

**Conclusions:** This review concludes that welfare state generosity, left-of-centre democratic political tradition and democracy are generally positively associated with population health. Globalisation may be negatively associated with population health, but the results are less conclusive. It is important for the academic public health community to engage with the political evidence base in its research as well as in stakeholder engagement, in order to facilitate positive outcomes for population health.



3

**Strengths and limitations of this study**

- We offer the largest systematic review on the political determinants of population health.
- The use of a systematic review design offers a robust and reproducible method that minimises potential reviewer bias.
- Our review also involved searching ten major scholarly databases in addition to relevant supplementary searches.
- The internationally comparative approach ensures relevance to readers worldwide.
- Resources meant it was unfeasible to conduct a new review from inception rather than an update of a 2010 review.

For peer review only

## INTRODUCTION

### *Conceptualising politics*

Politics is an omnipresent feature of modern civilisations worldwide and has been described as the “practice of the art or science of directing and administrating states”.<sup>1</sup> Political views and systems differ substantially globally. However, they can usefully be conceptualised in terms of two axes. The first is democracy vs autocracy, and conceptualises the extent to which the population decides, either directly or indirectly, its government and governance.<sup>2</sup> The second is the left vs right axis, and conceptualises the extent to which a government intervenes in an attempt to secure social goals (progressive, left wing) or focuses on economic freedom and minimal state intervention (conservative, right wing).<sup>3</sup>

### *Opportunities for politics to influence population health*

One of the founding fathers of social medicine Rudolph Virchow said that “Medicine is a social science, and politics nothing but medicine at a larger scale”.<sup>4</sup> Indeed, many pathways to public health impact are political,<sup>5</sup> although the precise structures by which these operate differ between countries. Especially in developed countries, the existence of formal evidence-based systems is common in the licensing of medicines and medical devices (for example the European Medicines Agency and the Food and Drug Administration (United States of America)) and the development of national clinical guidelines and the approval for specific medicines and medical devices to be used in public sector health systems (for example the National Institute of Health and Care Excellence on behalf of the National Health Service in England and Wales).

Nevertheless, as Virchow said, health is about far more than medicine. For example, social and economic inequalities are strong predictors of health inequalities<sup>6-7</sup> and increased income inequality at a societal level has been shown to be strongly associated with worse health outcomes including life expectancy, infant mortality, obesity and mental health, as well as social outcomes such as trust, education level and social mobility.<sup>8</sup> However, there is

5

evidence that political ideology and personal interests can exert substantial influences on policy-making processes relevant to health, leading to marked evidence-policy gaps.<sup>9</sup>

Political influences can operate at a variety of levels, including national governments, devolved governments (see supplementary file 1 for an example), and local authorities, which have taken a greater role in public health in recent years in many countries.<sup>10</sup>

### ***Existing evidence about the relationship between politics and population health***

While single-country evidence such as the review by Scott-Samuel et al<sup>11</sup> on the health effects of Thatcherism, and a recent studies on the effects of Conservative Party austerity in England<sup>12-13</sup> can be valuable, internationally comparative evidence allows us to transcend the particularities of individual countries. The most recent internationally comparative systematic review that assessed a wide range of political features was published in 2011 with searches up to April 2010 (the 2010 review).<sup>14</sup> It did not include a risk of bias assessment. It assessed four key political features: democracy, welfare state, left-of-centre political tradition and globalisation.

The 'contestability'<sup>15</sup> inherent in democracy may be health-promoting due to the potential electoral consequences of unpopular policies. Left-of-centre political tradition, and an advanced welfare state which is a key marker thereof,<sup>3</sup> may be health-promoting due to a greater focus on active state intervention to address social, economic and health inequalities,<sup>6-8</sup> and consequent greater alignment to public health mission statements, such as that of the European Public Health Association.<sup>16</sup> Globalisation is a multi-faceted concept, but may include trade liberalisation and free-markets, which are more favoured by the political right than the left.<sup>3</sup> The 2010 review suggested that globalisation was negatively associated with population health outcomes, while democracy, welfare state and left-of-centre political tradition were positively associated. The majority of studies had been published in the five year period up to the search, indicating an active field of research. This suggests that the 2010 review is likely now to be considerably out of date.

6

## ***Aims***

We offer an updated systematic review investigating relationships between four key political features (democracy, welfare state, political tradition, and globalisation) and population health outcomes. This represents the largest systematic review to date of evidence in this field.

## **METHODS**

### ***Design***

A narrative systematic review design was used following the internationally accepted PRISMA guidelines.<sup>17</sup> MB was the lead reviewer. Proportionate independent second review was performed by BH for each stage in the review process, whereby this author independently appraised 20% of records for each stage. There were few disagreements, and where these arose, they were resolved by discussion.

### ***Data sources***

As this was an updated systematic review, all included studies from the 2010 review proceeded directly to the full-text review stage. An update search was conducted on ten scholarly databases from 2010 to April 2017 inclusive (MEDLINE, AMED, EMBASE, PsycINFO (all Ovid), CINAHL, Philosopher's Index (both Ebsco), Science Citation Index Expanded, Social Sciences Citation Index, Emerging Sources Citation Index (all Web of Science) and Sociological Abstracts (ProQuest)), following the conceptual search strategy shown in Table 1, from which search strings for the syntax of each database were developed. The full MEDLINE search strategy is shown in Supplementary file 2. Supplementary searches back to 2006 were conducted on Google Scholar and in relevant bibliographies. The final search was conducted in November 2017.

### ***Inclusion criteria***

7

Records were screened initially by title and abstract, and then in full text form for potential inclusion according to the following criteria:

- Peer-reviewed journal article in a scientific journal or a scholarly book or chapter
- Study human populations either at the individual or ecological level
- Present at least one measure of a political exposure, conceptualised in terms of the welfare state, political tradition, democracy or globalisation. These political features were defined exactly following Muntaner et al, and listed in Table 2.<sup>14</sup>
- Present at least one measure of a population health outcome. Healthcare spending alone was not considered an eligible outcome
- Use any quantitative empirical design to link the exposure to the outcome
- Present a comparison involving at least 2 countries

#### **Data extraction**

Results were classified into one of four political themes – welfare state, political tradition, democracy and globalisation, as per Table 2. Studies were allowed to contribute to more than one political theme. The following information was extracted for each included study: i) bibliographic details, ii) sampling frame, iii) years of study, iv) design, v) political themes to which the study contributes, vi) measure(s) of political exposures, vii) measure(s) of population health outcome measures, and iix) results classification (positive, negative or inconclusive association between the political exposure and population health outcome measures).

#### **Risk of bias assessment**

Risk of bias assessment was conducted at the study level using the Threats to Validity Tool,<sup>18</sup> using the configuration of Barnish and Barnish,<sup>19</sup> with one modification. Loss-to-follow-up was not considered relevant for the body of studies included in this review. Following Barnish et al,<sup>20</sup> the categories were set as i) low risk of bias (high quality) if  $\geq 70\%$  of eligible items were assessed as at low risk of bias, ii) moderate risk of bias (moderate

8

quality) for 40-69%, and iii) high risk of bias (low quality) for  $\leq 39\%$ . This assessment could not be conducted for studies that only comprised of book chapters, since the tool is not suitable, and format incompatibility could introduce bias into the assessment.

### **Data synthesis**

In light of differences in political contexts between countries, and in terms of how political exposures and population health outcomes were measured, narrative synthesis was considered more appropriate than meta-analysis. Studies were grouped by political theme. In addition to our base case analysis, certain scenario analyses were conducted to further explore the data:

1. Studies that take economic factors into consideration, for each of the four themes except globalisation
2. Studies that include developing countries, for each of the four themes
3. Studies looking at general health or quality of life, for each of the four themes
4. Studies using a welfare regime classification scheme, for the welfare state theme
5. Studies using a political tradition classification scheme, for the political tradition theme

The scenario analysis on economic factors was not conducted for the globalisation theme because globalisation itself has a dominant economic component, so this is already measured. A formal test of economic mediation was not required – it was sufficient that studies took economic factors into consideration.

### **Patient and public involvement**

This is a systematic review of a broad range of population health outcomes and could not be represented by one patient group. Therefore, patients were not involved in the conduct of the study. There was no recruitment since this is a systematic review. The project director (MB) shall respond to reputable media requests and may approach selected media outlets about the possibility of disseminating the research findings more broadly.

## RESULTS

### *Search results*

Seventy-three de-duplicated records came from the 2010 review. Update database searches yielded 43, 356 records in total, of which 35,207 remained following deduplication. Supplementary searches on Google Scholar and in bibliographies yielded 55 additional records. From 35, 333 unique records, 255 proceeded to full-text screening and all were retrieved. 176 studies were included in our review (Supplementary file 3), of which 106 came from our update searches and 70 from the 2010 review. 82 studies were excluded at the full-text review stage (Supplementary file 4). Studies were published in final form a median of 6 years (IQR 4-8) after the year of final data collection and the longest lag was 20 years (Figure 1). The most recent data included in the analyses was collected in 2014. A PRISMA flowchart (Figure 2) and PRISMA checklist (Supplementary file 5) are provided. Eighty-five studies (49%) were assessed at low risk of bias, 89 (51%) at moderate risk of bias and none at high risk of bias. Risk of bias assessment could not be conducted for two studies (1% of total) whose only included publications came in the form of book chapters. Study-level risk of bias profiles are provided in Supplementary file 6.

### *Welfare state*

A total of 102 studies addressed the welfare state theme. Of these, 79 (77%) provided evidence that was favourable about the association of increased welfare state generosity with population health, 20 (20%) were inconclusive, and three (3%) were negative. Most studies either classified welfare state generosity in terms of a welfare regime classification or in terms of expenditure on health and social care. Welfare regime classifications did vary between studies, but often compared an 'advanced', e.g. Nordic<sup>21</sup> welfare regime with liberal and also market-driven/conservative alternatives. Health outcomes for welfare state studies included self-rated general health, quality of life,

10

1  
2  
3 prevalence of chronic conditions, mental health, life expectancy and child and infant  
4 mortality. Supplementary file 7 provides study-level details.  
5  
6

7           Among studies that took economic factors into consideration (n=83), 82% found a  
8 more generous welfare state to be positively associated with population health. Among  
9 studies including developing countries (n=23), 83% found this association. Among  
10 studies that used a general health or quality of life outcome (n=32), 69% found this association.  
11  
12 Considering only studies that used a welfare regime classification (n=45), 73% found this  
13 association.  
14  
15  
16  
17  
18

### 19 ***Political tradition***

20  
21  
22           A total of seventeen studies addressed the political tradition theme. Of these, 15  
23 (88%) were positive about the association of left-of-centre political tradition with population  
24 health, while two (12%) were inconclusive. Ways in which political tradition was measured  
25 included political tradition classification of ruling government, time in power by different  
26 parties, voter partisanship, proportion of seats held by left-wing or left-of-centre parties and  
27 working class power. Population health outcomes included life expectancy, infant and child  
28 mortality, life expectancy, older adult mortality, general self-rated health and successful  
29 implementation of effective health policies. Supplementary file 8 provides study-level details.  
30  
31  
32  
33  
34  
35  
36  
37  
38

39           All studies in the political tradition theme considered economic factors, so no  
40 scenario analysis was conducted on this factor. Among studies including developing  
41 countries, all (n=6) found left-of-centre political tradition to be positively associated with  
42 population health outcomes. Among studies that used a general health or quality of life  
43 outcome, all (n=6) found this association. Among studies that used a political tradition  
44 classification scheme (n=8), 88% found this association.  
45  
46  
47  
48  
49  
50

### 51 ***Democracy***

52  
53  
54           A total of 44 studies addressed the democracy theme. Of these, 34 (77%) were  
55 positive, eight (18%) were inconclusive and two (5%) negative. Ways in which democracy  
56  
57  
58  
59  
60



11

1  
2  
3 was measured included political transition to democracy, years of democracy since 1900,  
4 the presence of elections and standardised indices such as Polity IV.<sup>22</sup> Population health  
5 outcomes included measures such as general self-rated health, life expectancy, older adult  
6 mortality, and successful implementation of effective health policies, while there was a  
7 particular focus on infant and child mortality and other child health outcomes. Supplementary  
8 file 9 provides study-level details.

9  
10  
11  
12  
13  
14  
15 Among studies taking economic factors into consideration (n=39), 77% found  
16 democracy to be positively associated with population health outcomes. Among studies  
17 including developing countries (n=25), 76% found this association. Among studies that used  
18 a general health or quality of life outcome, all (n=3) found this association.

### 23 **Globalisation**

24  
25  
26 A total of 28 studies addressed the globalisation theme. Of these, seven (25%) were  
27 positive, seven (25%) were inconclusive, and fourteen (50%) were negative. Measures of  
28 globalisation included world-system role, foreign trade, debt dependency, imports and  
29 exports, as well as membership of organisations such as the World Trade Organization and  
30 standardised indices such as the Maastricht Globalization Index<sup>23</sup> and the KOF Index.<sup>24</sup>  
31 Many studies measured infant and child health outcomes and mortality, while assessed  
32 measures including life expectancy, obesity, water pollution and tobacco smoking rates.  
33 Supplementary file 10 provides study-level results.

34  
35  
36 All globalisation studies included data from developing countries, so no scenario  
37 analysis was performed on this factor. Only one study in this theme assessed general health  
38 or quality of life, and found a positive association between globalisation and health-related  
39 quality of life.

### 42 **Health outcomes**

43  
44  
45 Table 3 provides an overview of the results for each political exposure theme  
46 subdivided by health outcome. For the welfare state political exposure, the most commonly  
47

1  
2  
3 studied health outcomes were general health (n=35, 24 positive, 11 negative), life  
4 expectancy/adult mortality (n=28, 21 positive, 2 inconclusive, 5 negative), child mortality  
5 (n=13, 13 positive), and health inequalities (n=13, 11 positive, 2 inconclusive), noting that the  
6 latter are also measured indirectly through many of the other health outcomes in the table.  
7  
8 For political tradition, studies were more dispersed across outcomes, although the two  
9  
10 outcomes that received considerably more study than the others were life expectancy/adult  
11 mortality (n=9, 8 positive, 1 inconclusive) and infant mortality (n=8, 8 positive). For  
12  
13 democracy, by far the most widely studied outcomes were life expectancy/adult mortality  
14 (n=20, 16 positive, 1 negative, 3 inconclusive) and infant mortality (n=20, 15 positive, 1  
15  
16 negative, 4 inconclusive). Less consistent results were found for child mortality (n=10, 5  
17  
18 positive, 5 inconclusive).

19  
20  
21  
22  
23  
24  
25 For globalisation, studies were quite dispersed across outcomes and the results  
26  
27 patterning differed between outcomes, consistent with the evidence base in the review being  
28  
29 least conclusive for the globalisation outcome. For child mortality (n=6), the results were  
30  
31 equally split between positive (n=2), negative (n=2), and negative (n=2). The results were  
32  
33 also split for infant mortality (n=10, 4 positive, 3 negative, 3 inconclusive). For adult  
34  
35 mortality/life expectancy, there was a pattern in favour of a positive association with  
36  
37 globalisation (n=6, 4 positive, 1 negative, 1 inconclusive), while for nutritional, overweight  
38  
39 and obesity-related outcomes, the pattern was in favour of a negative association with  
40  
41 globalisation (n=6, 0 positive, 1 inconclusive, 5 negative).

## 42 43 44 **DISCUSSION**

### 45 46 47 ***Summary of findings***

48  
49  
50 We present a body of evidence from 176 internationally comparative scholarly  
51  
52 studies that together provides powerful evidence that key political characteristics are related  
53  
54 to a range of population health outcomes. The evidence was favourable about a positive  
55  
56 association with population health for all of increased welfare state generosity, left-of-centre  
57  
58  
59  
60

13

1  
2  
3 democratic political tradition and democracy, supported by over three quarters of eligible  
4 studies. Twice as much evidence supported a negative association with population health for  
5 globalisation than a positive association, although a quarter of studies were inconclusive.  
6  
7

### 8 9 **Scenario analyses**

10  
11  
12 Scenario analyses showed that i) most studies considered economic factors and  
13 excluding those that did not made little difference to the results, ii) apart from in the  
14 globalisation theme a minority of studies included developing countries but the results of  
15 those that did were generally consistent with those that did not, iii) classification schemes for  
16 welfare state and political tradition made little difference to the results, and iv) the proportion  
17 of studies using general health or quality of life outcome measures was relatively low, but the  
18 results were directionally consistent with the wider set of studies.  
19  
20  
21  
22  
23  
24  
25  
26

27  
28 In terms of analytical strategies to consider economic factors, a popular approach  
29 was to incorporate Gross Domestic Product (GDP) or Gross National Product (GNP) into the  
30 analytical modelling. Another approach used by some studies was to incorporate a measure  
31 of household income into the analysis. The former approach considers economic factors at  
32 the societal level, while the latter considers economic factors at the family level. The  
33 scenario analysis of studies including developing countries considered all studies that  
34 included developing countries, and was not restricted to studies that considered exclusively  
35 developing countries. The rationale for this was to provide an analysis in which any results  
36 particular to affluent, for example Organisation for Economic Co-operation and Development  
37 (OECD), countries, were excluded, thereby offering a broader and more representative  
38 insight into the relationship between political factors and global population health. Indeed,  
39 this was a systematic review of internationally comparative studies, in order to provide a  
40 global perspective. The scenario analysis provided for studies that included developing  
41 countries helps safeguard our findings against the potential that the observed findings are  
42 only applicable to affluent or developed countries. Many studies included data from a wide  
43  
44  
45  
46  
47  
48  
49  
50  
51  
52  
53  
54  
55  
56  
57  
58  
59  
60

14

1  
2  
3 range of countries, and combined with the approach of not excluding studies from the  
4  
5 scenario analysis that did not study exclusively developing countries, this offered a  
6  
7 safeguard against the potential dominance of data from a narrow set of countries. We  
8  
9 therefore do not consider that there is any evidence that the analyses in this report are  
10  
11 dominated by data from specific countries.  
12

### 13 ***Risk of bias assessment***

14  
15  
16 Eighty-five studies (49%) were assessed at low risk of bias, 89 (51%) at moderate  
17  
18 risk of bias and none at high risk of bias. However, low risk of bias of individual studies does  
19  
20 not mean that there is necessarily low risk of bias across studies, especially when grouping  
21  
22 so many heterogeneous studies. The three types of potential bias that were found quite  
23  
24 often were chance, group equivalence and potential conflict of interest. Most studies were  
25  
26 very large, however they tended not to provide a rationale for their sample size or provide  
27  
28 information to let us assess whether there may have been under- or indeed overpowered to  
29  
30 detect associations. Group equivalence is very hard to achieve in studies such as the ones  
31  
32 eligible for our review, since it would entail countries being similar in most other ways except  
33  
34 the political variable of interest. Substantive conflicts of interest were rare, but more of an  
35  
36 issue was an absence of funding statements or declarations as to whether there were any  
37  
38 conflicts of interest. This absence was particularly notable among studies published in social  
39  
40 science journals. No studies declared any party political members among the authors, yet it  
41  
42 seems incongruous to believe that no author among 176 health policy studies was a  
43  
44 member of a political party. Rather, it seems that political conflicts of interest are seldom  
45  
46 declared, when potentially they should.  
47  
48

### 49 ***Strengths***

50  
51  
52 We offer the largest systematic review on the political determinants of population  
53  
54 health, and the first wide ranging internationally comparative systematic review of similar  
55  
56 scope since 2010. The use of a systematic review design offers a robust and reproducible  
57  
58  
59

1  
2  
3 method that minimises potential reviewer bias in the selection and evaluation of studies for  
4 potential inclusion.<sup>25</sup> Our review also involved searching ten major scholarly databases and  
5 this very thorough coverage of the literature is reflected in a very low proportion of studies  
6 being identified from supplementary searches. All publications identified for full-text  
7 screening were successfully obtained. Conducting searches back to 2006 as part of our  
8 update enabled us to include a further ten eligible studies published before the search date  
9 of the 2010 review. We independently evaluated all studies from the 2010 review and  
10 allowed studies to contribute to multiple themes, allowing further relevant data to be  
11 included. The internationally comparative approach ensures relevance to readers worldwide  
12 and transcends the limitations associated with single-country studies. Unlike the authors of  
13 the 2010 review, we were able to provide a risk of bias assessment.

### 24 25 **Limitations**

26  
27  
28 Resources precluded a new review from inception, and required us to update an  
29 English-language only review from 2010. Moreover, conducting an update required us to  
30 maintain consistency with the 2010 review in terms of inclusion criteria, and precluded us  
31 from considering a wider range of grey literature sources, such as OECD reports, which may  
32 have relevant data. Moreover, the categorical form of data extraction in terms of positive,  
33 inconclusive or negative results followed this previous review and was necessitated by its  
34 scope and scale. Limiting reviews to the English language may not exert systematic bias in  
35 systematic reviews, at least according to evidence from reviews of healthcare  
36 interventions.<sup>26</sup> The diversity of political and health-system contexts as well as measures of  
37 political exposures and population health outcomes precluded meta-analysis. The  
38 internationally comparative approach increases relevance for an international readership, yet  
39 it introduces complexities in the mapping between political characteristics and political  
40 parties in both systematic and idiosyncratic ways.<sup>27-31</sup> Public health policy evidence is  
41 typically observational, which reflects real-world situations. Observational studies do not  
42 intrinsically overstate effect sizes<sup>32</sup> and can be highly valuable.<sup>5</sup> Causative inference can be  
43  
44  
45  
46  
47  
48  
49  
50  
51  
52  
53  
54  
55  
56  
57  
58  
59  
60

16

1  
2  
3 made more complicated by different causal pathways, different confounders, and different  
4  
5 covariates, although systems such as Bradford Hill<sup>33</sup> may be used as a starting point.  
6  
7 Studies did not regularly report their study design thoroughly or consistently in terms of  
8  
9 recognised design labels beyond the basics such as ecological vs individual studies, which  
10  
11 limited the level of detail in which information on study design could be extracted.  
12

### 13 ***Comparison with previous reviews***

14  
15  
16 Our review offers a seven and a half year search advance on the most recent  
17  
18 internationally comparative systematic review to offer an equivalent scope. The 2010 review  
19  
20 by Muntaner et al<sup>14</sup> included 73 studies, of which 70 were eligible for our review. Three were  
21  
22 excluded from our review since they only included healthcare spending as an outcome. We  
23  
24 considered that to be circular, since healthcare spending was also frequently used by  
25  
26 studies as a marker of welfare state generosity. To these 70 studies, we added a further 106  
27  
28 (10 of which were dated prior to the search of the 2010 review), giving a total of 176 studies  
29  
30 in our review. Those added by our update constituted 60% of the total (58% if the 10 studies  
31  
32 we added from prior to 2010 were removed from the numerator and denominator),  
33  
34 demonstrating how the scale of the evidence base for the political determinants of population  
35  
36 health has more than doubled over the past seven and a half years.  
37  
38

39  
40 The strength of evidence that welfare state generosity is positively associated with  
41  
42 population health has increased slightly (77% vs 72% positive), while the number of studies  
43  
44 has more than tripled (102 vs 32). The strength of evidence that left-of-centre political  
45  
46 tradition is positively associated with population health has increased markedly (88% vs 60%  
47  
48 positive), while the number of studies has increased modestly (17 vs 12). Notably, far fewer  
49  
50 studies have explicitly studied political tradition than the welfare state, which is one of the  
51  
52 key markers of political tradition. The strength of evidence that democracy is positively  
53  
54 associated with population health is largely unchanged (77% vs 78%), while the number of  
55  
56 studies has increased substantially (44 vs 27). The strength of evidence that globalisation is  
57  
58  
59  
60

17

1  
2  
3 negatively associated with population health has weakened (50% vs 75% negative), while  
4 the number of studies has increased sevenfold (28 vs 4).  
5  
6

7 A prior review in the interim<sup>34</sup> had found that the strength of evidence for the benefits  
8 of welfare state generosity was greater for studies assessing spending patterns than welfare  
9 regime typologies. We did not find a strong effect – 73% of studies assessing regime  
10 typologies were positive compared to 77% of studies irrespective of how the welfare state  
11 was measured. The Nordic model found in Scandinavia was presented by most studies as  
12 the example of an advanced welfare state. However, classifications used in these typologies  
13 are imperfect, and in many ways the Scottish system (see supplementary file 1) could be  
14 argued to represent a more advanced welfare state, since Norway for example does not  
15 offer universal free healthcare at point of use. Our findings on the welfare state and political  
16 tradition were also consistent with those of Scott-Samuel et al<sup>11</sup> regarding Thatcherism in the  
17 United Kingdom, which found a widening of health inequalities resultant from the introduction  
18 of reduced state welfare provision and increased privatisation and pro-market policies.  
19  
20  
21  
22  
23  
24  
25  
26  
27  
28  
29  
30

### 31 ***Perspectives on the role of academia***

32  
33  
34  
35 The presentation of an evidence base from 176 studies associating political factors with a  
36 range of population health outcomes offers an opportunity for the reader to reflect on the role  
37 of public health academia, in light of university research impact policies in many countries,  
38 and recently scholarly debates on the role of academia. Academic public health has a long  
39 pro-social political history.<sup>35</sup> A recent BMJ article<sup>36</sup> offers insight into ongoing debate on the  
40 relative priority of action and research in public health, while Smith et al<sup>37</sup> reflect on whether  
41 or not advocacy is a disciplinary duty for public health academics, and Kapilashrami et al<sup>38</sup>  
42 provide an interesting example of an advocacy programme. Indeed, there has been  
43 reticence both at the individual<sup>4</sup> and organisational<sup>39</sup> level to engage in advocacy.  
44  
45  
46  
47  
48  
49  
50  
51  
52  
53  
54  
55  
56  
57  
58  
59  
60  
61  
62  
63  
64  
65  
66  
67  
68  
69  
70  
71  
72  
73  
74  
75  
76  
77  
78  
79  
80  
81  
82  
83  
84  
85  
86  
87  
88  
89  
90  
91  
92  
93  
94  
95  
96  
97  
98  
99  
100  
101  
102  
103  
104  
105  
106  
107  
108  
109  
110  
111  
112  
113  
114  
115  
116  
117  
118  
119  
120  
121  
122  
123  
124  
125  
126  
127  
128  
129  
130  
131  
132  
133  
134  
135  
136  
137  
138  
139  
140  
141  
142  
143  
144  
145  
146  
147  
148  
149  
150  
151  
152  
153  
154  
155  
156  
157  
158  
159  
160  
161  
162  
163  
164  
165  
166  
167  
168  
169  
170  
171  
172  
173  
174  
175  
176  
177  
178  
179  
180  
181  
182  
183  
184  
185  
186  
187  
188  
189  
190  
191  
192  
193  
194  
195  
196  
197  
198  
199  
200  
201  
202  
203  
204  
205  
206  
207  
208  
209  
210  
211  
212  
213  
214  
215  
216  
217  
218  
219  
220  
221  
222  
223  
224  
225  
226  
227  
228  
229  
230  
231  
232  
233  
234  
235  
236  
237  
238  
239  
240  
241  
242  
243  
244  
245  
246  
247  
248  
249  
250  
251  
252  
253  
254  
255  
256  
257  
258  
259  
260  
261  
262  
263  
264  
265  
266  
267  
268  
269  
270  
271  
272  
273  
274  
275  
276  
277  
278  
279  
280  
281  
282  
283  
284  
285  
286  
287  
288  
289  
290  
291  
292  
293  
294  
295  
296  
297  
298  
299  
300  
301  
302  
303  
304  
305  
306  
307  
308  
309  
310  
311  
312  
313  
314  
315  
316  
317  
318  
319  
320  
321  
322  
323  
324  
325  
326  
327  
328  
329  
330  
331  
332  
333  
334  
335  
336  
337  
338  
339  
340  
341  
342  
343  
344  
345  
346  
347  
348  
349  
350  
351  
352  
353  
354  
355  
356  
357  
358  
359  
360  
361  
362  
363  
364  
365  
366  
367  
368  
369  
370  
371  
372  
373  
374  
375  
376  
377  
378  
379  
380  
381  
382  
383  
384  
385  
386  
387  
388  
389  
390  
391  
392  
393  
394  
395  
396  
397  
398  
399  
400  
401  
402  
403  
404  
405  
406  
407  
408  
409  
410  
411  
412  
413  
414  
415  
416  
417  
418  
419  
420  
421  
422  
423  
424  
425  
426  
427  
428  
429  
430  
431  
432  
433  
434  
435  
436  
437  
438  
439  
440  
441  
442  
443  
444  
445  
446  
447  
448  
449  
450  
451  
452  
453  
454  
455  
456  
457  
458  
459  
460  
461  
462  
463  
464  
465  
466  
467  
468  
469  
470  
471  
472  
473  
474  
475  
476  
477  
478  
479  
480  
481  
482  
483  
484  
485  
486  
487  
488  
489  
490  
491  
492  
493  
494  
495  
496  
497  
498  
499  
500  
501  
502  
503  
504  
505  
506  
507  
508  
509  
510  
511  
512  
513  
514  
515  
516  
517  
518  
519  
520  
521  
522  
523  
524  
525  
526  
527  
528  
529  
530  
531  
532  
533  
534  
535  
536  
537  
538  
539  
540  
541  
542  
543  
544  
545  
546  
547  
548  
549  
550  
551  
552  
553  
554  
555  
556  
557  
558  
559  
560  
561  
562  
563  
564  
565  
566  
567  
568  
569  
570  
571  
572  
573  
574  
575  
576  
577  
578  
579  
580  
581  
582  
583  
584  
585  
586  
587  
588  
589  
590  
591  
592  
593  
594  
595  
596  
597  
598  
599  
600  
601  
602  
603  
604  
605  
606  
607  
608  
609  
610  
611  
612  
613  
614  
615  
616  
617  
618  
619  
620  
621  
622  
623  
624  
625  
626  
627  
628  
629  
630  
631  
632  
633  
634  
635  
636  
637  
638  
639  
640  
641  
642  
643  
644  
645  
646  
647  
648  
649  
650  
651  
652  
653  
654  
655  
656  
657  
658  
659  
660  
661  
662  
663  
664  
665  
666  
667  
668  
669  
670  
671  
672  
673  
674  
675  
676  
677  
678  
679  
680  
681  
682  
683  
684  
685  
686  
687  
688  
689  
690  
691  
692  
693  
694  
695  
696  
697  
698  
699  
700  
701  
702  
703  
704  
705  
706  
707  
708  
709  
710  
711  
712  
713  
714  
715  
716  
717  
718  
719  
720  
721  
722  
723  
724  
725  
726  
727  
728  
729  
730  
731  
732  
733  
734  
735  
736  
737  
738  
739  
740  
741  
742  
743  
744  
745  
746  
747  
748  
749  
750  
751  
752  
753  
754  
755  
756  
757  
758  
759  
760  
761  
762  
763  
764  
765  
766  
767  
768  
769  
770  
771  
772  
773  
774  
775  
776  
777  
778  
779  
780  
781  
782  
783  
784  
785  
786  
787  
788  
789  
790  
791  
792  
793  
794  
795  
796  
797  
798  
799  
800  
801  
802  
803  
804  
805  
806  
807  
808  
809  
810  
811  
812  
813  
814  
815  
816  
817  
818  
819  
820  
821  
822  
823  
824  
825  
826  
827  
828  
829  
830  
831  
832  
833  
834  
835  
836  
837  
838  
839  
840  
841  
842  
843  
844  
845  
846  
847  
848  
849  
850  
851  
852  
853  
854  
855  
856  
857  
858  
859  
860  
861  
862  
863  
864  
865  
866  
867  
868  
869  
870  
871  
872  
873  
874  
875  
876  
877  
878  
879  
880  
881  
882  
883  
884  
885  
886  
887  
888  
889  
890  
891  
892  
893  
894  
895  
896  
897  
898  
899  
900  
901  
902  
903  
904  
905  
906  
907  
908  
909  
910  
911  
912  
913  
914  
915  
916  
917  
918  
919  
920  
921  
922  
923  
924  
925  
926  
927  
928  
929  
930  
931  
932  
933  
934  
935  
936  
937  
938  
939  
940  
941  
942  
943  
944  
945  
946  
947  
948  
949  
950  
951  
952  
953  
954  
955  
956  
957  
958  
959  
960  
961  
962  
963  
964  
965  
966  
967  
968  
969  
970  
971  
972  
973  
974  
975  
976  
977  
978  
979  
980  
981  
982  
983  
984  
985  
986  
987  
988  
989  
990  
991  
992  
993  
994  
995  
996  
997  
998  
999  
1000

18

1  
2  
3 knowledge translation with stakeholders, which may be valuable but also depends on  
4 ideological match.  
5

### 6 7 ***Recommendations for research*** 8

9  
10 It is important that health research increasingly focuses on real-world contexts to  
11 supplement more idealised studies.<sup>5</sup> Health research that does not consider political and  
12 cultural factors may lack relevance and generalisability,<sup>41</sup> especially research into the social  
13 determinants of health. Further research into the globalisation political exposure theme may  
14 help elucidate the evidence base in this area, and potentially distinguish different influences  
15 that may explain why globalisation seems to be able to be associated both positively and  
16 negatively with population health across health outcomes.  
17  
18  
19  
20  
21  
22  
23

### 24 25 ***Implications for policy and practice*** 26

27  
28 Clinicians and decision makers should be aware of the context in which they work,  
29 and the political influences on medicine and health outcomes. They should seek to find ways  
30 to increase the use of evidence in decisions impacting on health. Ideas such as ‘health in all  
31 policies’<sup>42</sup> are worthwhile, but only if they are genuinely put into action and not seen as a ‘tick  
32 box’ exercise.  
33  
34  
35  
36  
37  
38

### 39 40 ***Conclusion*** 41

42 In conclusion, we present a systematic review of 176 studies that demonstrates that  
43 welfare state, left-of-centre democratic political tradition and democracy are generally positively  
44 associated with a range of population health outcomes.  
45  
46  
47  
48

### 49 50 **FOOTNOTES** 51

52 **Contributors:** MB was the project director and project manager. The study was  
53 conceptualised by MB with input from MT and BH. Searches were conducted by MB. Study  
54 selection, data extraction and quality assessment were conducted by MB with proportionate  
55 second review from BH. Data interpretation was led by MB with input from MT and BH. MB  
56 wrote the first draft of the paper. MT and BH commented on the draft manuscript and  
57  
58  
59  
60



thereby contributed important revisions. All tables, figures and supplementary files were made by MB. All authors approved the submission. MB is the guarantor.

**Funding:** This research received no specific grant from any funding agency in the public, commercial or not-for-profit sectors.

**Competing interests:** The authors have personal views and/or memberships on the political left that we do not consider conflict with the vision of public health. MB is a member of the Labour Party (United Kingdom), MT is a member of the Scottish National Party (SNP, a centre-left pro-independence party that forms the devolved government of Scotland) and BH is not a member of any party. This work was not done on behalf of any political party and is not endorsed, influenced or supported in any way by the parties of which authors are members. MB is a social democrat/liberal socialist. MT is a democratic socialist and supports Scottish independence. BH is a democratic socialist. The authors engage in appropriate activities to promote public health and social justice. We have no financial conflicts of interest.

**Ethics approval:** No ethics approval was required for this systematic review of published literature.

**Declaration:** All views presented in this article are the authors' own, and not necessarily those of their institutions nor bodies that fund their other research projects.

**Data sharing statement:** No further data are available.

## REFERENCES

1. McLean I, McMillan A. Oxford concise dictionary of politics. Oxford: Oxford University Press; 2003.
2. Cartledge P. Democracy: a life. Oxford: Oxford University Press; 2015.
3. Gauchet M. Right and left. In: Nora P, Kritzman LD, editors. Realms of memory: conflicts and divisions. New York: Columbia University Press; 1997.
4. Mackenbach JP. Politics is nothing but medicine at a larger scale: reflections on public health's biggest idea. *J Epidemiol Community Health* 2008; 63: 181-4.
5. Barnish MS, Turner S. The value of pragmatic and observational studies in health care and public health. *Pragmat Obs Res* 2017; 8: 49-55.
6. Rowlingson K. Does income inequality cause health and social problems? York: Joseph Rowntree Foundation; 2011.
7. Marmot M. The Marmot Review: Fair Society, Healthy Lives. London: The Marmot Review; 2010.
8. Wilkinson R, Pickett K. The spirit level: why equality is better for everyone. London: Penguin; 2010.
9. Ferrie JE. Evidence and policy: mind the gap. *Int J Epidemiol* 2015; 44: 1-7.
10. Reijneveld SA. The return of community-based health and social care to local government: governance as a public health challenge. *Eur J Public Health* 2017; 27: 1.
11. Scott-Samuel A, Bambra C, Collins C, et al. The impact of Thatcherism on health and wellbeing in Britain. *Int J Health Serv* 2014; 44: 53-71.
12. Watkins J, Wulaningsih W, Da Zhou C, et al. Effects of health and social care spending constraints on mortality in England: a time trend analysis. *BMJ Open* 2017; 7: e017722.
13. Hiam L, Dorling D, Harrison D, et al. What caused the spike in mortality in England and Wales in January 2015? *J R Soc Med* 2017; 110: 131-7.

14. Muntaner C, Borrell C, Ng E, et al. Politics, welfare regimes, and population health: controversies and evidence. *Sociol Health Illn* 2011; 33: 946-64.
15. Dahl RA. *Polyarchy: participation and opposition*. New Haven: Yale University Press; 1971.
16. European Public Health Association. Who we are. Available at: <https://eupha.org/who-we-are> [Accessed 24 February 2018]
17. Moher D, Liberati A, Tetzlaff J, et al. Preferred reporting items for systematic reviews and meta-analyses: the PRISMA statement. *BMJ* 2009; 339: b2535.
18. Daley DJ, Myint PK, Gray RJ, et al. Systematic review on factors associated with medication non-adherence in Parkinson's disease. *Parkinsonism Relat Disord* 2012; 18: 1053-61.
19. Barnish MS, Barnish J. High-heeled shoes and musculoskeletal injuries: a narrative systematic review. *BMJ Open* 2016; 6: e010053.
20. Barnish MS, Whibley D, Horton SMC, et al. Roles of cognitive status and intelligibility in everyday communication in people with Parkinson's disease: a systematic review. *J Parkinsons Dis* 2016; 6: 453-62.
21. Kildal N, Kuhnle S. The Nordic welfare model and the idea of universalism. In: Kildal N, Kuhnle S, editors. *Normative foundations of the welfare state: the Nordic experience*. London: Routledge; 2006, pp.13-33.
22. Marshall MG, Jagers K. *Polity IV project: political regime characteristics and transitions*. Severn, MD: Center for Systemic Peace; 2006.
23. Figge L, Martens P. Globalisation continues: the Maastricht Globalization Index revisited and updated. *Globalizations* 2014; 11: 875-93.
24. Dreyer A. Does globalization affect growth? Evidence from a new index of globalization. *Appl Econom* 2006; 38: 1091-110.
25. Uman LS. Systematic reviews and meta-analyses. *J Can Acad Child Adolesc Psychiatry* 2011; 20: 57-59.
26. Jüni P, Holenstein F, Sterne J, et al. Direction and impact of language bias in meta-analyses of controlled trials. *Int J Epidemiol* 2002; 31: 115-23.
27. Goldfarb M. Liberal? Are we talking about the same thing? *BBC News*, 20 July 2010.
28. Thorpe A. *A history of the British Labour Party*. Basingstoke: Palgrave Macmillan; 2008.
29. Scott-Samuel A, Bambra C. A week is a long time in politics: the health implications of Jeremy Corbyn's UK Labour Party leadership victory. *Int J Health Serv* 2016; 46: 141-48.
30. Barnish M, Morgan HM, Barnish J. The 2016 HIGH Heels: Health effects And psychosexual Benefits (HIGH HABITS) study: systematic review of reviews and additional primary studies. *BMC Public Health* 2017; 18: 37.
31. Office of the Premier. B.C. bans mandatory high heels in the workplace. Victoria, British Columbia, 7 April 2017.
32. Concato J, Shah N, Horwitz RI. Randomized, controlled trials, observational studies, and the hierarchy of research designs. *N Engl J Med* 2000; 342:1887-92.
33. Hill AB. The environment and disease: association or causation? *Proceed R Soc Med* 1965; 58: 295-300.
34. Bergqvist K, Åberg Yngwe M, Lundberg O. Understanding the role of welfare state characteristics for health and inequalities – an analytical review. *BMC Public Health* 2013; 13: 1234.
35. Horton R. Offline: Medicine and Marx. *Lancet* 2017; 390: 2026.
36. Capewell S, Cairney P, Clarke A. Head to head: should action take priority over further research on public health? *BMJ* 2018; 360: k292.
37. Smith KE, Stewart EA. Academic advocacy in public health: disciplinary 'duty' or political 'propaganda'? *Soc Sci Med* 2017; 189: 35-43.

- 1
- 2
- 3 38. Kapilashrami A, Smith KE, Fustukian S, et al. Social movements and public health
- 4 advocacy in action: the UK people's health movement. *J Public Health (Oxf)* 2016;
- 5 38: 413-6
- 6 39. Chauvin JB. Advocacy: the silence of Europe's public health associations is
- 7 deafening. *Eur J Public Health* 2016; 26: 2.
- 8 40. Schafer P. Community-academic partnerships and social change. In O'Campo P,
- 9 Dunn JR, editors. *Rethinking social epidemiology: towards a science of change*.
- 10 Dordrecht: Springer Netherlands, 2011; pp. 285-304.
- 11 41. Levecque K, van Rossem R, de Boyser K, et al. Economic hardship and depression
- 12 across the life course: the impact of welfare state regimes. *J Health Soc Behav* 2011;
- 13 52: 262-76.
- 14 42. Ollilla E. Health in all policies: from rhetoric to action. *Scand J Public Health* 2011; 39
- 15 (Suppl 6): 11-8.
- 16
- 17
- 18
- 19
- 20
- 21
- 22
- 23
- 24
- 25
- 26
- 27
- 28
- 29
- 30
- 31
- 32
- 33
- 34
- 35
- 36
- 37
- 38
- 39
- 40
- 41
- 42
- 43
- 44
- 45
- 46
- 47
- 48
- 49
- 50
- 51
- 52
- 53
- 54
- 55
- 56
- 57
- 58
- 59
- 60

## TABLES

**Table 1. Conceptual search strategy**

((democracy OR autocracy OR welfare regime OR welfare state OR welfare capitalism OR politics OR political tradition OR internationality OR globalization) AND (health OR health services OR population health OR public health OR health economics OR health expenditure))

**Table 2. Definitions of political exposure variables**

| Exposure variable   | Definition                                                                                                                                                                                        |
|---------------------|---------------------------------------------------------------------------------------------------------------------------------------------------------------------------------------------------|
| Welfare state       | “if the analysis included welfare regimes or welfare state indicators (e.g. universal health coverage), but not measures of political ideology (e.g. along the left-right dimension)”             |
| Political tradition | “if the study included variables referring to the left-right political dimension (e.g. social democratic / egalitarian/ left vs. liberal / conservative / right political parties in government)” |
| Democracy           | “if the hypotheses tested involved democratic institutions or political rights”                                                                                                                   |
| Globalisation       | “if the article examined how high, middle, and/ or low countries are integrated through global networks of trade, foreign investment, and multinational corporations”                             |

Source of definitions: Muntaner C, Borrell C, Ng E, et al. Politics, welfare regimes, and population health: controversies and evidence. *Sociol Health Illn* 2011; 33: 946-64.

**Table 3. Overview of overall result classification by political exposure and health outcome**

|                         | Welfare state |   |   | Political tradition |   |   | Democracy |   |   | Globalisation |   |   |
|-------------------------|---------------|---|---|---------------------|---|---|-----------|---|---|---------------|---|---|
|                         | P             | N | I | P                   | N | I | P         | N | I | P             | N | I |
| Birth weight            | 4             | 0 | 0 | 2                   | 0 | 0 | 0         | 0 | 0 | 0             | 0 | 0 |
| Cancer                  | 1             | 0 | 0 | 0                   | 0 | 0 | 0         | 0 | 0 | 0             | 1 | 0 |
| Cerebrovascular disease | 0             | 0 | 0 | 0                   | 0 | 0 | 0         | 0 | 0 | 0             | 1 | 0 |
| Child mortality         | 13            | 0 | 0 | 3                   | 0 | 0 | 5         | 0 | 5 | 2             | 2 | 2 |
| Child wellbeing         | 1             | 0 | 0 | 0                   | 0 | 0 | 0         | 0 | 0 | 0             | 0 | 1 |

|                                        |    |   |    |   |   |   |    |   |   |   |   |   |
|----------------------------------------|----|---|----|---|---|---|----|---|---|---|---|---|
| Chronic conditions                     | 5  | 1 | 2  | 1 | 0 | 0 | 0  | 0 | 0 | 0 | 0 | 0 |
| Diabetes                               | 0  | 0 | 0  | 0 | 0 | 0 | 0  | 0 | 0 | 0 | 1 | 0 |
| Fertility and reproductive health      | 1  | 0 | 0  | 0 | 0 | 0 | 2  | 0 | 1 | 0 | 0 | 0 |
| General health                         | 24 | 0 | 11 | 4 | 0 | 0 | 4  | 0 | 0 | 1 | 0 | 0 |
| Health behaviours                      | 1  | 0 | 0  | 0 | 0 | 0 | 0  | 0 | 0 | 0 | 0 | 0 |
| Health care burden/need                | 3  | 0 | 0  | 0 | 0 | 0 | 0  | 0 | 0 | 0 | 0 | 0 |
| Heart disease                          | 0  | 0 | 0  | 0 | 0 | 0 | 0  | 0 | 0 | 0 | 1 | 0 |
| Health inequalities*                   | 11 | 0 | 2  | 2 | 0 | 0 | 0  | 0 | 0 | 0 | 0 | 0 |
| HIV/AIDS                               | 1  | 0 | 0  | 0 | 0 | 0 | 1  | 0 | 0 | 0 | 1 | 0 |
| Homicide and suicide                   | 0  | 0 | 1  | 0 | 0 | 0 | 0  | 0 | 0 | 0 | 1 | 0 |
| Immunisation/vaccination rates         | 0  | 0 | 0  | 0 | 0 | 0 | 0  | 1 | 0 | 0 | 1 | 0 |
| Implementation of effect health policy | 0  | 0 | 0  | 0 | 0 | 1 | 1  | 0 | 0 | 0 | 0 | 0 |
| Infant mortality                       | 16 | 0 | 2  | 8 | 0 | 0 | 15 | 1 | 4 | 4 | 3 | 3 |
| Life expectancy/adult mortality        | 21 | 2 | 5  | 8 | 0 | 1 | 16 | 1 | 3 | 4 | 1 | 1 |
| Maternal health                        | 0  | 1 | 0  | 0 | 0 | 0 | 0  | 0 | 0 | 0 | 0 | 0 |
| Mental health                          | 9  | 0 | 1  | 0 | 0 | 0 | 1  | 0 | 0 | 0 | 0 | 0 |
| Nutrition, overweight and obesity      | 0  | 0 | 0  | 0 | 0 | 0 | 1  | 0 | 2 | 0 | 5 | 1 |
| Oral health                            | 2  | 0 | 0  | 0 | 0 | 0 | 0  | 0 | 0 | 0 | 0 | 0 |
| Physical activity/health               | 1  | 0 | 0  | 2 | 0 | 0 | 1  | 0 | 0 | 0 | 0 | 0 |
| Pneumonia                              | 0  | 0 | 0  | 0 | 0 | 0 | 0  | 0 | 0 | 0 | 1 | 0 |
| Smoking                                | 0  | 0 | 1  | 1 | 0 | 1 | 0  | 0 | 0 | 0 | 1 | 0 |
| Tuberculosis                           | 2  | 0 | 0  | 0 | 0 | 0 | 1  | 0 | 0 | 0 | 0 | 2 |
| Water pollution                        | 0  | 0 | 0  | 0 | 0 | 0 | 0  | 0 | 0 | 0 | 2 | 0 |
| Wellbeing of the unemployed            | 1  | 0 | 1  | 0 | 0 | 0 | 0  | 0 | 0 | 0 | 0 | 0 |

Columns denote political exposure variables; rows denote health outcome variables; P = Positive, N = Negative, I = Inconclusive, \* this is additionally indirectly measured by many of the other outcomes

## FIGURE LEGENDS

**Figure 1.** Accumulation of evidence on the political determinants of population health over time.

**Figure 2.** PRISMA 2009 flow diagram.

1  
2  
3  
4  
5  
6  
7  
8  
9  
10  
11  
12  
13  
14  
15  
16  
17  
18  
19  
20  
21  
22  
23  
24  
25  
26  
27  
28  
29  
30  
31  
32  
33  
34  
35  
36  
37  
38  
39  
40  
41  
42  
43  
44  
45  
46  
47  
48  
49  
50  
51  
52  
53  
54  
55  
56  
57  
58  
59  
60



Accumulation of evidence on the political determinants of population health over time.

89x51mm (300 x 300 DPI)

Review only

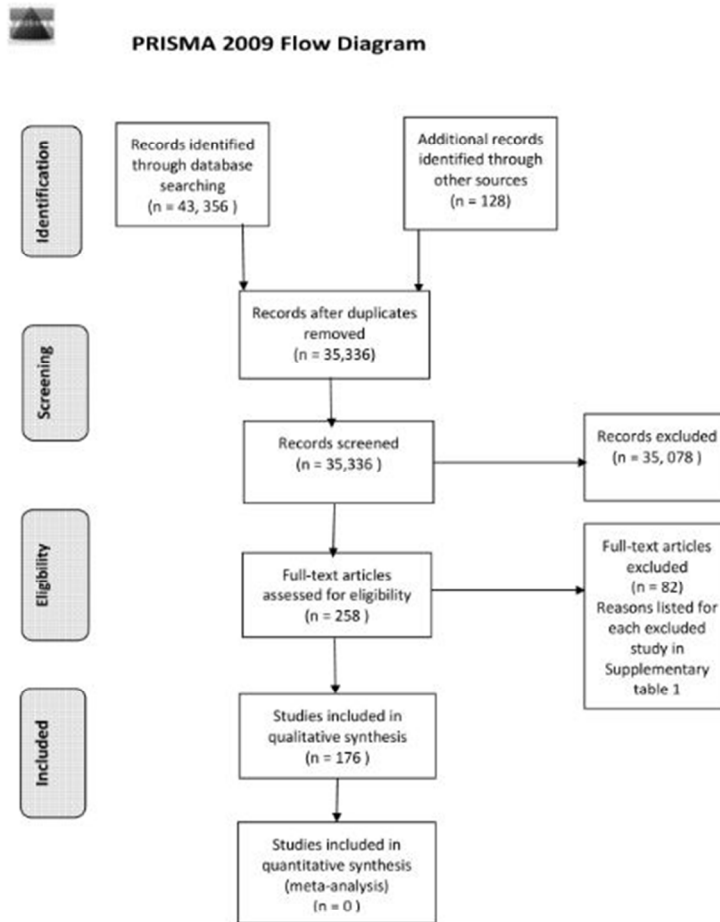

From: Moher D, Liberati A, Tetzlaff J, Altman DG, The PRISMA Group (2009). Preferred Reporting Items for Systematic Reviews and Meta-Analyses: The PRISMA Statement. PLoS Med 6(7): e1000097. doi:10.1371/journal.pmed1000097

For more information, visit [www.prisma-statement.org](http://www.prisma-statement.org).

PRISMA 2009 flow diagram.

48x63mm (300 x 300 DPI)

**Supplementary file 1. Devolution and health systems: examples of the differences in health provision between Scotland and England**

| <b>Scotland</b>                                                                                                      | <b>England</b>                              |
|----------------------------------------------------------------------------------------------------------------------|---------------------------------------------|
| <b>Free dental checks at 6-monthly intervals (although there is a charge for treatment)</b>                          | <b>Dental check costs £20.60</b>            |
| <b>Free NHS prescriptions</b>                                                                                        | <b>Prescription costs £8.60</b>             |
| <b>Free NHS eye tests</b>                                                                                            | <b>Commercial eye tests</b>                 |
| <b>Free personal and nursing care upon assessed need</b>                                                             | <b>Commercial care</b>                      |
| <b>Public health is NHS-run</b>                                                                                      | <b>Public health is local authority-run</b> |
| <b>Offers a free baby box scheme, supplying parents of newborn children with around 40 different essential items</b> | <b>No baby box scheme</b>                   |
| <b>Minimum alcohol unit pricing (implementation date 1 May 2018)</b>                                                 | <b>No minimum alcohol unit pricing</b>      |

All information correct at time of writing. Certain services that are chargeable in England are offered free of charge to those on certain state benefits, but are not universally free.

Table adapted from a slide from the following conference presentation by the lead author of this manuscript Dr Max Barnish: "Barnish M. Health policy and the politics of being an early career researcher. Invited oral presentation, Early Career Researchers Workshop, Society for Social Medicine Annual Scientific Meeting, Manchester, UK, 2017". The copyright to this slide is held by Dr Barnish.



## Supplementary file 2. Full MEDLINE search strategy

Platform: OVID

Version: Ovid MEDLINE(R) In-Process & Other Non-Indexed Citations and Ovid MEDLINE(R) 1946 to Present

Notes:

1. .mp indicates a keyword
2. In capitals followed by / indicates a MeSH term
3. exp indicates a MeSH term is exploded to encompass all subcategories, this was done by default

Search string:

(democracy.mp OR democratic.mp OR exp DEMOCRACY/ OR autocracy.mp OR autocratic.mp OR "welfare regime".mp OR exp SOCIAL WELFARE/ OR "welfare state".mp OR "welfare capitalism".mp OR politics.mp OR political.mp OR exp POLITICS/ OR "political tradition".mp OR globalisation.mp OR globalization.mp OR internationality.mp OR exp INTERNATIONALITY/)

AND

(health.mp OR exp HEALTH/ OR "health services".mp OR exp HEALTH SERVICES/ OR "population health".mp OR exp POPULATION HEALTH/ OR "public health".mp OR exp PUBLIC HEALTH/ OR "health economic".mp OR "health economics.mp" OR "health expenditure".mp OR "health expenditures.mp" OR exp HEALTH EXPENDITURES/ )

Limits: English language

**Supplementary file 3. List of all publications included in the review**

1. Ades F, Senterre C, de Azambuja E, et al. Discrepancies in cancer incidence and mortality and its relationship to health expenditure in the 27 European Union member states. *Ann Oncol* 2013; 24: 2897-902.
2. Adeyi O, Chellaraj G, Goldstein E, et al. Health status during the transition in Central and Eastern Europe: Development in reverse? *Health Policy Plan* 1997; 12: 132-45.
3. Akinci F, Hamidi S, Suvankulov F, et al. Examining the impact of health care expenditures on health outcomes in the Middle East and N. Africa. *J Health Care Finance* 2014; 41(1): 1-23.
4. Alvarez-Dardet C, Franco-Giraldo A. Democratisation and health after the fall of the Wall. *J Epidemiol Community Health* 2006; 60: 669-71.
5. Avendano M, Juerges H, Mackenbach JP. Educational level and changes in health across Europe: longitudinal results from SHARE. *J Eur Soc Policy* 2009; 19: 301-16.
6. Bambra C, Lunau T, van der Wel KA, et al. Work, health, and welfare: the association between working conditions, welfare states, and self-reported general health in Europe. *Int J Health Serv* 2014; 44: 113-36.
7. Bambra C, Pope D, Swami V, et al. Gender, health inequalities and welfare state regimes: a cross-national study of 13 European countries. *J Epidemiol Community Health* 2009; 63: 38-44.
8. Bambra C, Eikemo TA. Welfare state regimes, unemployment and health: a comparative study of the relationship between unemployment and self-reported health in 23 European countries. *J Epidemiol Community Health* 2009; 63: 92-8.
9. Bambra C. Health status and the worlds of welfare. *Soc Policy Soc* 2006; 5: 53-62.
10. Bambra C. Cash versus services: 'worlds of welfare' and the decommodification of cash benefits and health care services. *J Soc Policy* 2005; 34: 195-213.
11. Batniji R, Khatib L, Cammett M, et al. Governance and health in the Arab world. *Lancet* 2014; 383: 343-55.
12. Baum MA, Lake DA. The political economy of growth: democracy and human capital, *Am J Pol Sci* 2003; 47: 333-47.
13. Bentley RJ, Pevalin D, Baker E, et al. Housing affordability, tenure and mental health in Australia and the United Kingdom: a comparative panel analysis. *Housing Studies* 2016; 31: 208-22.
14. Bergh A, Nilsson T. Good for living? On the relationship between globalization and life expectancy. *World Dev* 2010; 38: 1191-1203.
15. Besley T, Kudamatsu M. Health and democracy. *Am Econ Rev* 2006; 96: 313-18.
16. Bosdriez JR, Willemsen MC, Stronks K, et al. Tobacco control policy development in the European Union: do political factors matter? *Eur J Public Health* 2015; 25: 190-4.
17. Borrell C, Espelt A, Rodriguez-Sanz M, et al. Analysing differences in the magnitude of socioeconomic inequalities in self-perceived health by countries of different political tradition in Europe. *Int J Health Serv* 2009; 39: 321-41.
18. Bozorgmehr K, Sebastian M. 2014. Trade liberalization and tuberculosis incidence: a longitudinal multi-level analysis in 22 high burden countries between 1990 and 2010. *Health Policy Plan* 2014; 29: 328-51.
19. Bradley EH, Elkins BR, Herrin J, et al. Health and social services expenditures: associations with health outcomes. *BMJ Qual Saf* 2011; 20: 826-831.
20. Brandt M, Hank K. Scars that will not disappear: long-term associations between early and later life unemployment under different welfare regimes. *J Soc Policy* 2014; 43: 727-43.

21. Bremberg SG. The rate of country-level improvements of the infant mortality rate is mainly determined by previous history. *Eur J Public Health* 2016; 26: 597-601.
22. Burroway R. Democracy and child health in developing countries. *Int J Comparat Sociol* 2016; 57: 338-64.
23. Burstrom B, Whitehead M, Clayton S, et al. Health inequalities between lone and couple mothers and policy under different welfare regimes – the example of Italy, Sweden and Britain. *Soc Sci Med* 2010; 70: 912–20.
24. Cereseto S, Waitzkin, H. Economic-development, political-economic system, and the physical quality-of-life. *Am J Public Health* 1986; 76: 661–66.
25. Chuang Y-C, Sung P-W, Chao HJ, et al. A longitudinal ecological study of the influences of political, economic, and health services characteristics on under-five mortality in less-developed countries. *Health Place* 2013; 23: 111-21.
26. Chuang K-Y, Sung P-W, Chang C-J, et al. Political and economic characteristics as moderators of the relationship between health services and infant mortality in less-developed countries. *J Epidemiol Community Health* 2013; 67: 1006-12.
27. Chung H, Muntaner C. Welfare state matters: a typological multilevel analysis of wealthy countries. *Health Policy* 2007; 80:328–39.
28. Chung H, Muntaner C. Political and welfare state determinants of infant and child health indicators: an analysis of wealthy countries. *Soc Sci Med* 2006; 63: 829–42.
29. Conley D, Springer KW. Welfare state and infant mortality. *Am J Sociol* 2001; 107: 768–807.
30. Copeland A, Bambra C, Nylén L, et al. All in it together? The effects of recession on population health and health inequalities in England and Sweden, 1991-2010. *Int J Health Serv* 2015; 45: 3-24.
31. Correa H, Namkoong K. Determinants and effects of health policy. *Journal Policy Model* 1992; 14: 41–63.
32. Corsi DJ, Subramanian SV. Association between coverage of maternal and child health interventions, and under-5 mortality: a repeated cross-sectional analysis of 35 sub-Saharan African countries. *Glob Health Action* 2014; 7: 24765.
33. Costa-Font J, Mas N. ‘Globesity’? The effects of globalization on obesity and caloric intake. *Food Policy* 2016; 64: 121-32.
34. Craveiro D. Ties and inequalities in later life: welfare state regime and the role of social networks in health inequalities in later life in Europe. *Eur Soc* 2017; 19: 268-71.
35. Cross P, Edwards RT, Opondo M, et al. Does farm worker health vary between localised and globalised food supply systems? *Environ Int* 2009; 35: 1004-14.
36. De Vogli RD, Kouvonen A, Elovainio M, et al. Economic globalization, inequality and body-mass index: a cross-national analysis of 127 countries. *Crit Public Health* 2014; 24: 7-21.
37. Dahl E, van der Wel KA. Educational inequalities in health in European welfare states: a social expenditure approach. *Soc Sci Med* 2013; 81:60–9.
38. Dahl E, Fritzell J, Lahelma E, et al. Welfare state regimes and health inequalities. In Siegrist J, Marmot, M, editors. *Social Inequalities in Health: New Evidence and Policy Implications*. Oxford: Oxford University Press; 2006.
39. Deeming C, Hayes D. Worlds of welfare capitalism and wellbeing: a multilevel analysis. *J Soc Policy* 2012; 41: 811-29.
40. Devaux M. Income-related inequalities and inequities in health care services utilisation in 18 selected OECD countries. *Eur J Health Econom* 2015; 16: 21-33.
41. Dietrich S, Bernhard M. State or regime? The impact of institutions on welfare outcomes. *Eur J Develop Res* 2015; 28: 252-69.

42. Doherty AM, Kelly BD. Social and psychological correlates of happiness in 17 European countries. *Irish J Psychol Med* 2010; 27(3): 130-4.
43. Dragano N, Siegrist J, Wahrendorf M. Welfare regimes, labour policies and unhealthy psychosocial working conditions: a comparative study with 9917 older employees from 12 European countries. *J Epidemiol Community Health* 2010; 65: 793-9.
44. Dujardin C, Farfan-Portet M-I, Mitchell R, et al. Does country influence the health burden of informal care? An international comparison between Belgium and Great Britain. *Soc Sci Med* 2011; 73: 1123-32.
45. Eikemo TA, Bambra C, Judge K, et al. Welfare state regimes and differences in self-perceived health in Europe: a multilevel analysis. *Soc Sci Med* 2008; 66: 2281-95.
46. Eikemo TA, Huisman M, Bambra C, et al. Health inequalities according to educational level in different welfare regimes: a comparison of 23 European countries. *Sociol Health Illn* 2008; 30: 565-82.
47. Elgar FJ, Aitken N. Income inequality, trust and homicide in 33 countries. *Eur J Public Health* 2011; 21: 241-6.
48. Elo J, Daponte A, Navarro V. Health indicators and the organization of healthcare systems in Western Europe. *Am J Public Health* 1995; 85: 1397-1401.
49. Engster D, Stensöta HO. Do family policy regimes matter for children's well-being? *Soc Polit* 2011, 18(1):82-124.
50. Esmaeli A, Mansouri S, Moshavash M. Income inequality and population health in Islamic countries. *Public Health* 2011; 125: 577-84.
51. Espelt A, Borrell C, Rodriguez-Sanz, M, et al. Inequalities in health by social class dimensions in European countries of different political traditions. *Int J Epidemiol* 2008; 37: 1095-1105.
52. Esser I, Palme J. Do public pensions matter for health and wellbeing among retired persons? Basic and income security pensions across 13 Western European countries. *Int J Soc Welfare* 2010; 19: S103-20.
53. Estimé MS, Lutz B, Strobel F. Trade as a structural driver of dietary risk factors for noncommunicable diseases in the Pacific: an analysis of household income and expenditure survey data. *Globalization Health* 2014; 10: 48.
54. Fan VY, Faioso Le'au R. Insights in public health: a tale of two polities: health in Independent and American Samoa. *Hawaii J Med Public Health* 2015; 74: 179-84.
55. Farfan-Portet M, Popham F, Mitchell R, et al. Caring, employment and health among adults of working age: evidence from Britain and Belgium. *Eur J Public Health* 2010; 20: 52-7.
56. Fayissa B. The determinants of infant and child mortality in developing countries: the case of Sub-Saharan Africa. *Rev Black Polit Econ* 2001; 29: 83-100.
57. Foubert J, Levecque K, van Rossem R, et al. Do welfare regimes influence the association between disability and self-perceived health? A multilevel analysis of 57 countries. *Soc Sci Med* 2014; 117: 10-7.
58. Franco A, Alvarez-Dardet C, Ruiz MT. Effect of democracy on health: ecological study. *BMJ* 2004; 329: 1421-23.
59. Frey RS, Al-Roumi A. Political democracy and the physical quality of life: the cross-national evidence. *Soc Indic Res* 1999; 47: 73-97.
60. Fritzell S, Vannoni F, Whitehead M, et al. Does non-employment contribute to the health disadvantage among lone mothers in Britain, Italy and Sweden? Synergy effects and the meaning of family policy. *Health Place* 2012; 18: 199-208.
61. Fritzell J, Kangas O, Bacchus Hertzman J, et al. Cross-temporal and cross-national poverty and mortality rates among developed countries. *J Environ Public Health* 2013; 2013: 915490.

62. Fumagalli E, Mentzakis E, Suhrcke M. Do political factors matter in explaining under- and overweight outcomes in developing countries. *J Socioecon* 2013; 46: 48-56.
63. Gauri V, Khaleghian P. Immunization in developing countries: its political and organizational determinants, *World Dev* 2002; 30: 2109–32.
64. Gerring J, Thacker SC. Do neoliberal economic policies kill or save lives? *Bus Polit* 2008; 10: 1-33.
65. Gesthuizen M, Huijts T, Kraaykamp G. Explaining health marginalisation of the lower educated: the role of cross-national variations in health expenditure and labour market conditions. *Sociol Health Illn* 2012, 34:591–607.
66. Ghobarah HA, Huth P, Russett, B. Comparative public health: the political economy of human misery and well-being. *Int Stud Q* 2004; 48: 73–94.
67. Gilligan AM, Skrepnek GH. Determinants of life expectancy in the Eastern Mediterranean Region. *Health Policy Plan* 2015; 30, 624-37.
68. Gizelis T. Wealth alone does not buy health: political capacity, democracy, and the spread of AIDS. *Polit Geogr* 2009; 28: 121–31.
69. Glass J, Andersson MA, Simon RW. Parenthood and happiness: effects of work-family reconciliation policies in 22 OECD countries. *Am J Sociol* 2016; 122, 886-929.
70. Goryakin Y, Lobstein T, James WPT, et al. The impact of economic, political and social globalization on overweight and obesity in the 56 low and middle income countries. *Soc Sci Med* 2015; 133: 67-76.
71. Granados JAT. Politics and health in eight European countries: a comparative study of mortality decline under social democracies and right-wing governments. *Soc Sci Med* 2010; 71: 841-50.
72. Grosse Frie K, Eikemo TA, Knesebeck OvD. Education and self-reported health care seeking behaviour in European welfare regimes: results from the European Social Survey. *Int J Public Health* 2010; 55: 217–20.
73. Guarnizo-Herreño CC, Tsakos G, Sheiham A, et al. Oral health and welfare state regimes: a cross-national analysis of European countries. *Eur J Oral Sci* 2013; 121: 169-75.
74. Harding S, Lenguerrand E, Costa G, et al. Trends in mortality by labour market position around retirement ages in three European countries with different welfare regimes. *Int J Public Health* 2013; 58: 99-108.
75. Hájek O, Grebeníček P, Popesko B, et al. Czech Republic vs EU-27: economic level, health care and population health. *Cent Eur J Public Health* 2012; 20(3): 167-73.
76. Hauck K, Martin S, Smith PC. Priorities for action on the social determinants of health: empirical evidence on the strongest associations with life expectancy in 54 low-income countries, 1990-2012. *Soc Sci Med* 2016; 167: 88-98.
77. Heijink R, Koolman X, Westert GP. Spending more money, saving more lives? The relationship between avoidable mortality and healthcare spending in 14 countries. *Eur J Health Econ* 2013; 14: 527-38.
78. Hoffman R. Socioeconomic inequality in old-age mortality: a comparison of Denmark and the USA. *Soc Sci Med* 2011; 72: 1986-92.
79. Houweling TAJ, Caspar AEK, Looman WN, et al. Determinants of under-5 mortality among the poor and the rich: a cross-national analysis of 43 developing countries. *Int J Epidemiol* 2005; 34: 1257–65.
80. Huijts T, Perkins JM, Subramanian SV. Political regimes, political ideology and self-rated health in Europe: a multilevel analysis. *PLoS One* 2010; 5: e11711.
81. Jolly CM, Namugabo E, Nguyen G, et al. Net food imports and obesity in selected Latin American & Caribbean countries. *Adv Manag Appl Econom* 2013; 3(6); 159-77.

82. Jorgenson AK. Foreign direct investment and the Environment, the mitigating influence of Institutional and Civil Society factors, and relationships between industrial pollution and human health a panel study of less-developed countries. *Organ Environ* 2009; 22: 135-57.
83. Jorgenson AK. Political-economic integration, industrial pollution and human health: a panel study of less-developed countries, 1980-2000. *Int. Sociol* 2009; 24: 115-43.
84. Karim SA, Eikemo TA, Bambra C. Welfare state regimes and population health: integrating the East Asian welfare states. *Health Policy* 2010; 94: 45-53.
85. Kick EL, Nasser R, Davis BL, et al. Militarization and infant-mortality in the third-world. *J Polit Militar Sociol* 1990; 18: 285-305.
86. Klenk J, Keil U, Jaensch A, et al. Changes in life expectancy 1950-2010: contributions from age- and disease-specific mortality in selected countries. *Population Health Metrics* 2016; 14: 20.
87. Klomp J, de Haan J. Effects of governance on health: a cross-national analysis of 101 Countries. *Kyklos* 2008; 61: 599-614.
88. Klomp J, de Haan, J. Is the political system really related to health? *Soc Sci Med* 2009; 69: 36-46.
89. Krueger PM, Dovel K, Denney JT. Democracy and self-rated health across 67 countries: a multilevel analysis. *Soc Sci Med* 2015; 143: 137.
90. Kudamatsu M. Has democratization reduced infant mortality in sub-Saharan Africa? *J Eur Econ Assoc* 2012; 10: 1294-317.
91. Kouvo A, Räsänen P. Foundations of subjective well-being in turbulent times: a comparison of four European countries. *Int J Sociol Soc Policy* 2015; 35: 2-17.
92. Lahelma E, Arber S. Health inequalities among men and women in contrasting welfare states: Britain and three Nordic countries compared. *Eur J Public Health* 1994; 37: 213-26.
93. Lake DA, Baum MA. The invisible hand of democracy – political control and the provision of public services. *Comp Polit Stud* 2001; 34: 587-621.
94. Lena HF, London B. The political and economic-determinants of health outcomes – a cross-national analysis. *Int J Health Serv* 1993; 23: 585-602.
95. Levecque K, van Rossem R, de Boyser K, et al. Economic hardship and depression across the life course: the impact of welfare state regimes. *J Health Soc Behav* 2011; 52: 262-76.
96. Levecque K, Van Rossem R. Depression in Europe: does migrant integration have mental health payoffs? A cross-national comparison of 20 European countries. *Ethn Health* 2015; 20: 49-65.
97. Levine DI, Rothman D. Does trade affect child health? *J Health Econ* 2006; 25: 538-54.
98. Lin R-T, Chen Y-M, Chien L-C, et al. Political and social determinants of life expectancy in less developed countries: a longitudinal study. *BMC Public Health* 2012; 12: 85
99. Lin R-T, Chien L-C, Chen Y-M, et al. Governance matters: an ecological association between governance and child mortality. *Int Health* 2014; 6: 249-57.
100. London B, Williams BA. National politics, international dependency, and basic needs provision – a cross-national analysis. *Soc Forces* 1990; 69: 565-84.
101. López-Casasnovas G, Soley-Bori M. The socioeconomic determinants of health: economic growth and health in the OECD countries during the last three decades. *Int J Environ Res Public Health* 2014; 11: 815-29.
102. Lundberg O, Yngwe MA, Stjerne MK, et al. The role of welfare state principles and generosity in social policy programmes for public health: an international comparative study. *Lancet* 2008; 372: 1633-40.

103. McKinnon B, Harper S, Kaufman JS. Do socioeconomic inequalities in neonatal mortality reflect inequalities in coverage of maternal health services? Evidence from 48 low- and middle-income countries. *Matern Child Health J* 2016; 20: 434-6.
104. Mackenbach JP. Political conditions and life expectancy in Europe, 1990-2008. *Soc Sci Med* 2013; 82: 134-46.
105. Mackenbach JP, Hu Y, Looman CWN. Democratization and life expectancy in Europe, 1960-2008. *Soc Sci Med* 2013; 93: 166-75.
106. Mackenbach JP, McKee M. A comparative analysis of health policy performance in 43 European countries. *Eur J Public Health* 2013; 23: 195-201.
107. Martens P, Akin SM, Maud H, et al. Is globalization healthy: a statistical indicator analysis of the impacts of globalization on health. *Glob. Health* 2010; 6:16.
108. Maynard G. Neoliberal trade and investment policies, the ITGA and youth smoking rates: a cross-national analysis of developing nations. *Sociol Spectr* 2015; 35: 419-41.
109. Maynard G. Health international non-governmental organizations, democracy, and tuberculosis mortality in developing nations: a longitudinal analysis. *Sociol Spectr* 2016; 36: 303-20.
110. Miething A, Lundberg O, Geyer S. Income and health in different welfare contexts: a comparison of Sweden, East and West Germany. *Scand J Public Health* 2013; 41: 260-8.
111. Menon-Johansson MA. Good governance and good health: the role of societal structures in the human immunodeficiency virus pandemic. *BMC Int Health Hum Rights* 2005; 5: 96-111.
112. Milner A, McLure R, Sun J, et al. Globalization and suicide: an empirical investigation in 35 countries over the period 1980-2006. *Health Place* 2011; 17: 996-1003.
113. Minagawa Y. Inequalities in healthy life expectancy in Eastern Europe. *Populat Dev Rev* 2013; 39: 649-71.
114. Moon BE, Dixon WJ. Politics, the state, and basic human-needs – a cross-national-study. *Am J Polit Sci* 1985; 29: 661-94.
115. Moor N, de Graaf PM, Komter A. Family, welfare state generosity and the vulnerability of older adults: a cross-national survey. *J Aging Stud* 2013; 27: 347-57.
116. Moore S, Teixeira AC, Shiell, A. The health of nations in a global context: trade, global stratification, and infant mortality rates. *Soc Sci Med* 2006; 63: 165-78.
117. Mukherjee N, Kriekhaus J. Globalization and human well-being. *Int Polit Sci Rev* 2012; 33(2): 150-70.
118. Muldoon KA, Galway LP, Nakajima M, et al. Health system determinants of infant, child and maternal mortality: a cross-sectional study of UN member countries. *Global Health* 2011; 7:42.
119. Muntaner C, Davis O, Mclsaack K, et al. Retrenched welfare regimes still lessen social class inequalities in health: a longitudinal analysis of the 2003-2010 EU-SILC in 23 European countries. *Int J Health Serv* 2017; 47: 410-31.
120. Muntaner C, Borrell C, Kunst A, et al. Social class inequalities in health: does welfare state regime matter? In Raphael D, Bryant T, Rioux MH, editors. *Staying alive: critical perspectives on health, illness, and health care*. Toronto: Canadian Scholars Press; 2006.
121. Muntaner C, Lynch JW, Hillemeier M, et al. Economic inequality, working-class power, social capital, and cause-specific mortality in wealthy countries. *Int J Health Serv* 2002; 32: 629-56.

122. Navarro V, Muntaner C, Borrell C, et al. Politics and health outcomes. *Lancet* 2006; 368: 1033–37.
123. Navarro V, Borrell C, Benach J, et al. The importance of the political and the social in explaining mortality differentials among the countries of the OECD, 1950–1998. *Int J Health Serv* 2003; 33: 419–94.
124. Navarro V, Shi LY. The political context of social inequalities and health. *Int J Health Serv* 2001; 31: 1–21.
125. Navia P, Zweifel TD. Democracy, dictatorship, and infant mortality revisited. *J Democracy* 2003; 14: 90–103.
126. Nelson K, Fritzell J. Welfare states and population health: the role of minimum income benefits for mortality. *Soc Sci Med* 2014; 112: 63–71.
127. Nordenmark M, Strandh M, Layte R. The impact of unemployment benefit system on the mental well-being of the unemployed in Sweden, Ireland and Great Britain. *Eur Societies* 2006; 8: 83–110.
128. Novignon J, Olakojo SA, Novignon J. The effects of public and private health care expenditure on health status in sub-Saharan Africa: new evidence from panel data analysis. *Health Econ Rev* 2012; 2: 22.
129. Oberlander L, Disdier A-C, Etilé F. Globalisation and national trends in nutrition and health: A grouped fixed-effects approach to intercountry heterogeneity. *Health Econ* 2017; 26: 1146–61.
130. Olafsdottir S. Fundamental causes of health disparities: stratification, the welfare state, and health in the United States and Iceland. *J Health Soc Behav* 2007; 48: 239–253.
131. Olsen KM, Dahl SA. Health differences between European countries. *Soc Sci Med* 2007, 64: 1665–78.
132. Oster E. Routes of infection: exports and HIV incidence in sub-Saharan Africa. *J Eur Econ Assoc* 2012; 10: 1025–58.
133. Ouweneel P. Social security and well-being of the unemployed in 42 nations. *J Happiness Stud* 2002; 3: 167–92.
134. Owen AL, Wu S. Is trade good for your health? *Rev Int Econ* 2007; 15: 660–82.
135. Palència L, Malmusi D, de Moortel D, et al. The influence of gender equality policies on gender inequalities in health in Europe. *Soc Sci Med* 2013; 117: 25–33.
136. Pickett KE, Wilkinson RG. Child wellbeing and income inequality in rich countries: ecological cross sectional study. *BMJ* 2007; 335: 1080.
137. Pillai VK, Gupta R. Cross-national analysis of a model of reproductive health in developing countries. *Soc Sci Res* 2006; 35: 210–27.
138. Pinzón-Flórez CE, Fernández-Niño JA, Ruiz-Rodríguez M, et al et al. Determinants of performance of health systems concerning maternal and child health: a global approach. *PLoS ONE* 2015; 10: e0120747.
139. Platts LG. A prospective analysis of labour market status and self-rated health in the UK and Russia. *Econ Transit* 2015; 23(2): 343–70.
140. Ploubidis GB, Dale C, Grundy E. Later life health in Europe: how important are country level influences? *Eur J Ageing* 2012; 9:5–13.
141. Popham F, Dibben C, Bambra C. Are health inequalities really not the smallest in the Nordic welfare states? A comparison of mortality inequality in 37 countries. *J Epidemiol Community Health* 2013; 67: 412–8.
142. Raphael D, Bryant T. The welfare state as a determinant of women's health: support for women's quality of life in Canada and four comparison nations. *Health Policy* 2004; 68: 63–79.



- 1
- 2
- 3 143. Reeves A, Basu S, McKee M, et al. Social protection and tuberculosis control
- 4 in 21 European countries, 1995-2012: a cross-national statistical modelling analysis.
- 5 *Lancet Infect Dis* 2014; 14: 1105-12.
- 6 144. Richter M, Rathman K, Nic Gabhainn S, et al. Welfare state regimes, health
- 7 and health inequalities in adolescence: a multilevel study in 32 countries. *Sociol*
- 8 *Health Illn* 2012; 34: 858-79.
- 9 145. Ross M. Is democracy good for the poor? *Am J Polit Sci* 2006; 50: 860-74.
- 10 146. Rostila M. Social capital and health in European welfare regimes: a multilevel
- 11 approach. *J Eur Soc Policy* 2007; 17: 223-39.
- 12 147. Rovny AE. Welfare state policy determinants of fertility level: a comparative
- 13 analysis. *J Eur Soc Policy* 2011; 21: 335-47.
- 14 148. Rudra N, Haggard S. Globalization, democracy, and effective welfare
- 15 spending in the developing world. *Comp Polit Stud* 2005; 38: 1015-49.
- 16 149. Sacker A, Worts D, McDonough P. Social influences on trajectories of self-
- 17 rated health: evidence from Britain, Germany, Denmark and the USA. *J Epidemiol*
- 18 *Community Health* 2011; 65:130-6.
- 19 150. Safaei J. Is democracy good for health? *Int J Health Serv* 2006; 36: 767-86.
- 20 151. Sanders AE, Slade GD, John MT, et al. A cross-national comparison of
- 21 income gradients in oral health quality of life in four welfare states: application of the
- 22 Korpi and Palme typology. *J Epidemiol Community Health* 2009; 63: 569-74.
- 23 152. Sarti S, Alberio M, Terraneo M. Health inequalities and the welfare state in
- 24 European families. *J Sociol Soc Welfare Needs* 2013; 40: 103-30.
- 25 153. Sekine M, Chandola T, Martikainen P, et al. Socioeconomic inequalities in
- 26 physical and mental functioning of British, Finnish, and Japanese civil servants: role
- 27 of job demand, control, and work hours. *Soc Sci Med* 2009; 69: 1417-25.
- 28 154. Shandra JM, Shandra CL, London B. Do non-governmental organizations
- 29 impact health? A cross-national analysis of infant mortality. *Int J Comp Sociol* 2010;
- 30 51: 137-164.
- 31 155. Shandra JM, Nobles J, London B, et al. Dependency, democracy, and infant
- 32 mortality: a quantitative, cross-national analysis of less developed countries. *Soc Sci*
- 33 *Med* 2004; 59: 321-33.
- 34 156. Shen C, Williamson JB. Accounting for cross-national differences in infant
- 35 mortality decline (1965-1991) among less developed countries: effects of women's
- 36 status, economic dependency, and state strength. *Soc Ind Res* 2001; 53: 257-88.
- 37 157. Shen C, Williamson JB. Child mortality, women's status, economic
- 38 dependency, and state strength: a cross-national study of less developed countries,
- 39 *Social Forces* 1997; 76: 667-700.
- 40 158. Shim J. Social welfare expenditures and infant mortality. *Soc Work Public*
- 41 *Health* 2015; 30: 567-77.
- 42 159. Stavrova O, Schlösser T, Fetchenhauer D. Are the unemployed equally
- 43 unhappy all over the world? The role of the social norms to work and welfare state
- 44 provision in 28 OECD countries. *J Econ Psychol* 2011; 32: 159-71.
- 45 160. Stroup MD. Economic freedom, democracy, and the quality of life. *World Dev*
- 46 2007; 35: 52-66.
- 47 161. Stuckler D, Basu S, McKee M. Budget crises, health, and social welfare
- 48 programmes. *BMJ* 2010, 340:c3311.
- 49 162. Tsai MC. Does political democracy enhance human development in
- 50 developing countries? A cross-national analysis, *Am J Econ Sociol* 2006; 65:
- 51 233-68.
- 52
- 53
- 54
- 55
- 56
- 57
- 58
- 59

- 1  
2  
3 163. Van der Heuvel M, Hopkins J, Biscaro A, et al. A comparative analysis of  
4 early child health and development services and outcomes in countries with different  
5 redistributive policies. *BMC Public Health* 2013; 13: 1049.
- 6 164. Van der Wel KA, Dahl E, Thielen K. Social inequalities in 'sickness':  
7 European welfare states and non-employment among the chronically ill. *Soc Sci*  
8 *Med* 2011; 73: 1608-17.
- 9 165. Van Tuyckom C. Macro-environmental factors associated with leisure-time  
10 physical activity: a cross-national analysis of EU countries. *Scand J Public Health*  
11 2011; 39: 419-26.
- 12 166. Vahid Shahidi F, Siddiqi A, Muntaner C. Does social policy moderate the  
13 impact of unemployment on health? A multilevel analysis of 23 welfare states. *Eur J*  
14 *Public Health*. *Eur J Public Health* 2016; 26: 1017-22.
- 15 167. Veenhoven R. Well-being in the welfare state. *J Comp Policy Anal* 2000; 2:  
16 91-125.
- 17 168. Veenhoven R, Ouweneel P. Livability of the welfare-state – appreciation-of-  
18 life and length-of-life in nations varying in state-welfare-effort. *Soc Indic Res* 1995;  
19 36: 1-48.
- 20 169. Vöörmann R, Helemäe J. A comparative analysis of gender differences in  
21 self-rated health: is the Baltic Sea a frontier of the East-West health divide in  
22 Europe? *Filosofija-Sociologija* 2013; 24(2): 62-70.
- 23 170. Wejnert B. Effect of global democracy on women's reproductive health:  
24 1970-2005, cross-world analysis. *Marriage Fam Rev* 2008; 41 (3-4): 14-37.
- 25 171. Whitehead M, Burstrom B, Diderichsen, F. Social policies and the pathways  
26 to inequalities in health: a comparative analysis of lone mothers in Britain and  
27 Sweden. *Soc Sci Med* 2000; 50: 255-70.
- 28 172. Witvliet MI, Kunst A, Arah OA, et al. Sick regimes and sick people: a  
29 multilevel investigation of the population health consequences of perceived national  
30 corruption. *Trop Med Internat Health* 2013; 18: 1240-7.
- 31 173. Wu JCL, Chiang TL. Comparing child mortality in Taiwan and selected  
32 industrialized countries. *J Formos Med Assoc.* 2007, 106 (2): 177-180.
- 33 174. York R, Bell SE. Life satisfaction across nations: the effects of women's  
34 political status and public priorities. *Soc Sci Res* 2014; 48: 48-61.
- 35 175. Zambon A, Boyce W, Cois E, et al. Do welfare regimes mediate the effect of  
36 socioeconomic position on health in adolescence? A cross-national comparison in  
37 Europe, North America, and Israel. *Int J Health Serv* 2006; 36: 309-29.
- 38 176. Zweifel TD, Navia P. Democracy, dictatorship, and infant mortality. *J*  
39 *Democracy* 2000; 11: 99-114.
- 40  
41  
42  
43  
44  
45  
46  
47  
48  
49  
50  
51  
52  
53  
54  
55  
56  
57  
58  
59  
60

1  
2  
3  
4  
5  
6  
7  
8  
9  
10  
11  
12  
13  
14  
15  
16  
17  
18  
19  
20  
21  
22  
23  
24  
25  
26  
27  
28  
29  
30  
31  
32  
33  
34  
35  
36  
37  
38  
39  
40  
41  
42  
43  
44  
45  
46  
47  
48  
49  
50  
51  
52  
53  
54  
55  
56  
57  
58  
59  
60

#### Supplementary file 4. List of all publications excluded at full-text screening, with reasons

1. Abbott P, Wallace C. Exploring economic and social transformations in post-Soviet Russia, Ukraine and Belarus. *Eur Societies* 2010; 12: 653-74. No eligible comparisons.
2. Aggarwal S. 2010-2012 global health care reforms and their impact on pricing, access and health outcomes strategy. *Value Health* 2012; 15(7): A291. Abstract only.
3. Aldabe B, Anderson R, Lyly-Yrjänäinen, et al. Contribution of material, occupational, and psychosocial factors in the explanation of social inequalities in health in 28 countries in Europe. *J Epidemiol Community Health* 2011; 65: 1123-31. No eligible exposures.
4. Alsan M, Bloom DE, Canning D. The effect of population health on foreign direct investment inflows to low-and middle-income countries. *World Dev* 2006; 34: 613-30. No eligible comparisons.
5. Alves S. Welfare state changes and outcomes – the cases of Portugal and Denmark from a comparative perspective. *Soc Pol Adm* 2015; 49: 1-23. Study design.
6. Amouzou A, Kozuki N, Gwatkin DR. Where is the gap? The contribution of disparities within developing countries to global inequalities in under-five mortality. *BMC Public Health* 2014; 14: 216. No eligible exposures.
7. Arán-Matero D, Amico P, Arán-Fernandez C, et al. Levels of spending and resource allocation to HIV programs and services in Latin America and the Caribbean. *PLoS ONE* 2011; 6: e22373. No eligible comparisons.
8. Arnold RG, Heyworth J, Sáez AE, et al. The status of water and sanitation among Pacific Rim nations. *Rev Environ Health* 2011; 26: 17-30. No eligible comparisons.
9. Atikeler K, Piniakho O. Pricing and reimbursement policies of Turkey and Ukraine. *Value in Health* 2015; 18(7): A573. Abstract only.
10. Azemar C, Desbordes R. Public governance, health and foreign direct investment in sub-Saharan Africa. *J Afr Econ* 2009; 18: 667-709. No eligible comparisons.
11. Balaj M, McNamara CL, Eikemo TA, et al. The social determinants of inequalities in self-reported health in Europe: findings from the European social survey (2014) special module on the social determinants of health. *Eur J Public Health* 2017; 27: 107-14. No eligible comparisons.
12. Basch CH, Samuel L, Ethan D. Obesity, diabetes and heart disease: effects of globalization on population health, preventive efforts, and the importance of social change. *Int J Health Promot Educ* 2013; 51: 185-97. Study design.
13. Basu S, McKee M, Galea G, et al. Relationship of soft drink consumption to global overweight, obesity, and diabetes: a cross-national analysis of 75 countries. *Am J Public Health* 2013; 103: 2071-7. No eligible exposures.
14. Bayati M, Akbarian R, Kavosi Z. Determinants of life expectancy in eastern mediterranean region: a health production function. *Int J Health Policy Manag* 2013; 1: 57-61. No relevant comparisons.
15. Beckfield J, Olafsdottir S, Bakhtiari E. Health inequalities in global context. *Am Behav Sci* 2013; 57: 1014-39. No eligible comparisons.

16. Bernard S, Hotte L, Winer SL. Democracy, inequality and the environment when citizens can mitigate health consequences of pollution privately or act collectively. *Eur J Polit Econ* 2014; 34: 142-56. Study design.
17. Borrell C, Morrison J, Burstrom B, et al. Comparison of health policy documents of European cities: are they oriented to reduce inequalities in health? *J Public Health Policy* 2013; 34: 100-20. Study design.
18. Brady D, Marquandt S, Gauchat G, et al. Path dependency and the politics of socialized health care. *J Health Politics Pol Law* 2016; 41: 355-92. No eligible outcomes.
19. Burstrom B, Whitehead M, Clayton S, et al. Health inequalities between lone and couple mothers and policy under different welfare regimes – the example of Italy, Sweden and Britain. *Soc Sci Med* 2010; 70: 912–20. Duplicate.
20. Carbone G. Do new democracies deliver social welfare? Political regimes and health policy in Ghana and Cameroon. *Democratization* 2012; 19(2): 157-83. No relevant outcomes.
21. Chauvel L, Leist AK. Socioeconomic hierarchy and health gradient in Europe: the role of income inequality and of social origins. *Int J Equity Health* 2015; 14: 132. No eligible exposures.
22. Clark SE, Hawkes C, Murphy SM, et al. Exporting obesity: US farm and trade policy and the transformation of the Mexican consumer food environment. *Int J Occupat Environ Health* 2012; 18: 54-64. No eligible comparisons.
23. Christiansen NV, Kahlmeier S, Racioppi F. Sport promotion policies in the European Union: results of a contents analysis. *Scand J Med Sci Sports* 2014; 24: 428-38. Study design.
24. Chuang K-Y, Sung P-W, Chang C-J, et al. Political and economic characteristics as moderators of the relationship between health services and infant mortality in lessdeveloped countries. *J Epidemiol Community Health* 2013; 67: 1006-12. Duplicate.
25. Cross P, Edwards RT, Nyeko P, et al. The potential impact on farmer health of enhanced export horticultural trade between the U.K. and Uganda. *Int J Environ Res Public Health* 2009; 6: 1539-56. No eligible comparisons.
26. De Andrade LOM, Pellegrini Fillho A, Solar O, et al. Social determinants of health, universal health coverage, and sustainable development.: case studies from Latin American countries. *Lancet* 2015; 385: 1343-51. Study design.
27. De Vogli R, Kouvonen A, Gimeno D. ‘Globesization’: ecological evidence on the relationship between fast food outlets and obesity among 26 advanced economies. *Crit Public Health* 2011; 21: 395-402. No eligible exposures.
28. Docherty WJ, Mendenhall TJ, Berge JM. The Families and Democracy and Citizen Health Care Project. *J Marital Family Ther* 2010; 36: 389-402. No relevant comparisons.
29. Etherington D, Ingold J. Welfare to work and the inclusive labour market: a comparative study of activation policies for disability and long-term sickness claimants in the UK and Denmark. *J Eur Soc Policy* 2012; 22(1): 30-44. No eligible outcomes.
30. Elgar FJ, Davis CG, Wohl MJ, et al. Social capital, health and life satisfaction in 50 countries. *Health Place* 2011; 17, 1044-53. No eligible exposures.
31. Fazel S, Geddes JR, Kushel M. The health of homeless people in high-income countries: descriptive epidemiology, health consequences, and clinical and policy recommendations. *Lancet* 2014; 384, 1529-40. Not primary research.
32. Ferrarini T, Sjöberg O. Social policy and health: transition countries in a comparative analysis. *Int J Soc Welfare* 2010; 19: S60-88. Study design.
33. Friel S, Gleeson D, Thow A-M, et al. A new generation of trade policy: potential risks to diet-related health from the trans pacific partnership agreement. *Global Health* 2013; 9: 46. Study design.

- 1
- 2
- 3
- 4 34. Gregorio LE, Gregorio DI. Polity and health care expenditures: the association among 159
- 5 nations. *J Epidemiol Global Health* 2013; 3: 49-57. No eligible outcomes.
- 6
- 7 35. Gustafsson N-KJ, Ramstedt MR. Changes in alcohol-related harm in Sweden after increasing
- 8 alcohol import quotas and a Danish tax decrease - an interrupted time-series analysis for
- 9 2000-2007. *Int J Epidemiol* 2011; 40, 432-40. No eligible comparisons.
- 10
- 11 36. Habibov NN, Afandi EN. Self-rated health and social capital in transitional countries:
- 12 multilevel analysis of comparative surveys in Armenia, Azerbaijan and Georgia. *Soc Sci Med*
- 13 2011; 72: 1993-204. No eligible exposures.
- 14
- 15 37. Habibov N. Who wants to redistribute? An analysis of 14 post-Soviet nations. *Soc Policy*
- 16 *Admin* 2013; 47: 262-86. No eligible outcomes.
- 17
- 18 38. Harding R, Stasavage D. What democracy does (and doesn't do) for basic services: school
- 19 fees, school inputs, and African elections. *J Politics* 2013; 76: 229-45. No eligible outcomes.
- 20
- 21 39. Herwartz H, Theilen B. Health care and ideology: a reconsideration of political determinants
- 22 of public healthcare funding in the OECD. *Health Econom* 2014; 23, 225-40. No eligible
- 23 outcomes.
- 24
- 25 40. Herwartz H, Theilen B. Partisan influence on social spending under market integration, fiscal
- 26 pressure and institutional change. *Eur J Polit Econ* 2014; 34, 40924. No eligible outcomes.
- 27
- 28 41. Hicken A, Kollman K, Simmons JW. Party system nationalization and the provision of public
- 29 health services. *Polit Sci Res Meth* 2016; 4: 573-94. No eligible exposures.
- 30
- 31 42. Higo M, Khan HTA. Global population aging: unequal distribution of risks in later life between
- 32 developed and developing countries. *Glob Soc Policy* 2015; 15(2): 146-66. Study design.
- 33
- 34 43. Hogan MC, Foreman KJ, Naghavi M, et al. Maternal mortality for 181 countries, 1880-2008: a
- 35 systematic analysis of progress towards Millennium Development Goal 5. *Lancet* 2010; 375,
- 36 1609-23. Study design.
- 37
- 38 44. Huber E, Mustillo T, Stephens JD. Politics and social spending in Latin America. *J Polit* 2008;
- 39 70: 420-36. No eligible outcomes.
- 40
- 41 45. James PD, Wilkins R, Detsky AS, et al. Avoidable mortality by neighbourhood income in
- 42 Canada: 25 years after the establishment of universal health insurance. *J Epidemiol*
- 43 *Community Health*. 2007, 61: 287-96. No eligible comparisons.
- 44
- 45 46. Jensen C. Two sides of the same coin? Left-wing governments and labour unions as
- 46 determinants of public spending. *Socioeconom Rev* 2012; 10: 217-40. No eligible outcomes.
- 47
- 48 47. Jensen C. Marketization via compensation: health care and the politics of the right in
- 49 advanced industrialized nations. *Br J Polit Sci* 2011; 41: 907-26. Study design.
- 50
- 51 48. Kaufman RR, Segura-Ubierno A. Globalization, domestic politics and social spending in Latin
- 52 America: a time-series cross-section analysis, 1973-1997. *Dados* 2001; 44: 435-79. No
- 53 eligible outcomes.
- 54
- 55 49. Kawachi I. Globalization and workers' health. *Ind. Health* 2008; 46: 421-23. Study design.
- 56
- 57 50. Kawiorska D. Healthcare in the light of the concept of welfare state regimes:
- 58 comparative analysis of EU member states. *Oeconomia Coperanicana* 2016; 7: 187206. No
- 59 eligible outcomes.
- 60
- 61 51. Korda RJ, Butler JR, Clements MS, et al. Differential impacts of health care in Australia: trend
- 62 analysis of socioeconomic inequalities in avoidable mortality. *Int J Epidemiol*. 2007; 36: 157-
- 63 165. No eligible comparisons.
- 64
- 65 52. Koutsogeorgou E, Nyqvist F, Nygård M, et al. Social capital and self-rated health among older
- 66 adults: a comparative analysis of Finland, Poland and Spain. *Ageing Soc* 2015; 35: 653-67. No
- 67 eligible exposures.
- 68
- 69 53. Levecque K, van Rossem R, Ronda E, et al. Depression in different welfare state regimes in
- 70 Europe: the role of attitudes towards state responsibility for an adequate standard of living. *J*
- 71 *Epidemiol Community Health* 2011; 65: A126. Abstract only.

- 1
  - 2
  - 3
  - 4
  - 5
  - 6
  - 7
  - 8
  - 9
  - 10
  - 11
  - 12
  - 13
  - 14
  - 15
  - 16
  - 17
  - 18
  - 19
  - 20
  - 21
  - 22
  - 23
  - 24
  - 25
  - 26
  - 27
  - 28
  - 29
  - 30
  - 31
  - 32
  - 33
  - 34
  - 35
  - 36
  - 37
  - 38
  - 39
  - 40
  - 41
  - 42
  - 43
  - 44
  - 45
  - 46
  - 47
  - 48
  - 49
  - 50
  - 51
  - 52
  - 53
  - 54
  - 55
  - 56
  - 57
  - 58
  - 59
  - 60
54. Liang LL, Mirelman AJ. An assessment of socio-political determinants and international aid for government health expenditures. *Soc Sci Med* 2014; 114: 161-8. No eligible outcomes.
55. McMichael AJ. Globalization, climate change, and human health. *N Engl J Med* 2013; 368: 1335-43. Study design.
56. Mackenbach JP. Cultural values and population health: a quantitative analysis of variations in cultural values, health behaviours and health outcomes among 42 European countries. *Health Place* 2014; 28: 116-32. No eligible exposures.
57. Mackenbach JP, Karanikolos M, Lopez Bernal J, et al. Why did life expectancy in Central and Eastern Europe suddenly improve in the 1990s? An analysis by cause of death. *Scand J Public Health* 2015; 43: 796-801. No eligible exposures.
58. Marmot M, Allen J, Bell R, et al. WHO European review of social determinants of health and the health. *Lancet* 2012; 380: 1011-29. Study design.
59. Marten R, McIntyre D, Travassos C, et al. An assessment of progress towards universal health coverage in Brazil, Russia, India, China, and South Africa (BRICS). *Lancet* 2014; 384: 2164-71. Study design.
60. Minicuci N, León Díaz EM, Gómez León M, et al. Disability-free life expectancy: a cross-national comparison among Bulgarian, Italian and Latin American older population. *J Aging Health* 2011; 23: 629-81. No eligible political variables.
61. Moene KO, Wallerstein M. Earnings inequality and welfare spending – a disaggregated analysis. *World Polit* 2003; 55: 485–516. No eligible outcomes.
62. Molina-Mula J, de Pedro-Gómez JE. Impact of the politics of austerity in the quality of healthcare: ethical advice. *Nurs Philosoph* 2013; 14: 53-60. Study design.
63. Moller S, Misra J, Strader E. A cross-national look at how welfare states reduce inequality. *Sociol Compass* 2013; 7(2): 135-46. Study design.
64. Mukhopadhyay K, Chaudhuri S. Economic liberalisation, gender wage inequality and welfare. *J Internat Econ Dev* 2013; 22: 1214-39. No relevant outcomes.
65. Muntaner C. Democracy, authoritarianism, political conflict and population health: a global, comparative, and historical approach. *Soc Sci Med* 2013; 86: 107-12. Study design.
66. Muntaner C, Borrell C, Solà J, et al. Class relations and all-cause mortality: a test of Wright's social class scheme using the Barcelona 2000 Health Interview Survey. *Int J Health Serv* 2011; 41: 431-58. No relevant comparisons.
67. Muntaner C, Benach J, Chung H, et al. Welfare state, labour market inequalities and health. In a global context: an integrated framework. *SESPAS Report 2010. Gaceta Sanitaria* 2010; 24: 56-61. Study design.
68. Muntaner C, Chung H, Solar O, et al. A macro-level model of employment relations and health inequalities. *Int J Health Serv* 2010; 40(2): 215-21. Study design.
69. Nyquist F, Nygård M. Is the association between social capital and health robust across the Nordic regions? Evidence from a cross-sectional survey of older adults. *Int J Soc Welfare* 2013; 22(2): 119-29. No eligible exposures.
70. Or Z, Cases C, Lisac M, et al. Are health problems systemic? Politics of access and choice under Beveridge and Bismarck systems? *Health Econom Policy Law* 2010; 5: 269-93. Study design.
71. Raine KD. Obesity epidemics: inevitable outcome of globalization or preventable public health challenge? *Int J Public Health* 2012; 57: 35-6. Study design.
72. Razzak JA, Khan UR, Azam I, et al. Health disparities between Muslim and non-Muslim countries. *East Mediterr Health J* 2011; 18: 654-64. No eligible exposures.
73. Reeves A, McKee M, Basu S, et al. The political economy of austerity and healthcare: cross-national analysis of expenditure changes in 27 European nations, 1995-2011. No eligible outcomes.

- 1  
2  
3  
4  
5  
6  
7  
8  
9  
10  
11  
12  
13  
14  
15  
16  
17  
18  
19  
20  
21  
22  
23  
24  
25  
26  
27  
28  
29  
30  
31  
32  
33  
34  
35  
36  
37  
38  
39  
40  
41  
42  
43  
44  
45  
46  
47  
48  
49  
50  
51  
52  
53  
54  
55  
56  
57  
58  
59  
60
74. Simons AMW, Groffen DAI, Bosma H. Socio-economic inequalities in all-cause mortality in Europe: an exploration of the role of heightened social mobility. *Eur J Public Health* 2013; 23: 1010-2. No eligible exposures.
75. Vågerö D. The East-West health divide in Europe: growing and shifting eastwards. *J Soc Pol Studs* 2010; 8(3): 319-30. Study design.
76. Victora CG, Barros AJD, Axelson H, et al. How changes in coverage affect equity in maternal and child health interventions in 35 Countdown to 2015 countries: an analysis of national surveys. *Lancet* 2012; 380: 1149-56. No eligible exposures.
77. Wahrendorf M, Reinhardt JD, Siegrist J. Relationships of disability with age among adults aged 50 to 85: evidence from the United States, England and Continental Europe. *PLoS ONE* 2013; 8: e71893. No eligible exposures.
78. Wang Y, Lim H. The global childhood obesity epidemic and the association between socio-economic status and childhood obesity. *Int Rev Psychiatr* 2012; 24: 176-88. No eligible exposures.
79. Wilkinson RG, Pickett K. *The spirit level: why equality is better for everyone*. London: Penguin; 2010. Study design.
80. Wismar M, McQueen D, Lin V, et al. Rethinking the politics and implementation of health in all policies. *Israel J Health Policy Res* 2013; 2: 17. Study design.
81. Yamashita T, Kunkel SR. An international comparison of the association among literacy, education and health across the United States, Canada, Switzerland, Italy, Norway and Bermuda: implications for health disparities. *Asian J Soc Psychol* 2016; 18: 264-74. No eligible exposures.
82. Younsi M, Chakroun M. Does social capital determine health? Empirical evidence from MENA countries. *Soc Sci J* 2016; 53(3): 371-9. No eligible exposures.



# PRISMA 2009 Checklist

| Section/topic                      | #  | Checklist item                                                                                                                                                                                                                                                                                              | Reported on page #       |
|------------------------------------|----|-------------------------------------------------------------------------------------------------------------------------------------------------------------------------------------------------------------------------------------------------------------------------------------------------------------|--------------------------|
| <b>TITLE</b>                       |    |                                                                                                                                                                                                                                                                                                             |                          |
| Title                              | 1  | Identify the report as a systematic review, meta-analysis, or both.                                                                                                                                                                                                                                         | 1                        |
| <b>ABSTRACT</b>                    |    |                                                                                                                                                                                                                                                                                                             |                          |
| Structured summary                 | 2  | Provide a structured summary including, as applicable: background; objectives; data sources; study eligibility criteria, participants, and interventions; study appraisal and synthesis methods; results; limitations; conclusions and implications of key findings; systematic review registration number. | 2                        |
| <b>INTRODUCTION</b>                |    |                                                                                                                                                                                                                                                                                                             |                          |
| Rationale                          | 3  | Describe the rationale for the review in the context of what is already known.                                                                                                                                                                                                                              | 4-5                      |
| Objectives                         | 4  | Provide an explicit statement of questions being addressed with reference to participants, interventions, comparisons, outcomes, and study design (PICOS).                                                                                                                                                  | 5                        |
| <b>METHODS</b>                     |    |                                                                                                                                                                                                                                                                                                             |                          |
| Protocol and registration          | 5  | Indicate if a review protocol exists, if and where it can be accessed (e.g., Web address), and, if available, provide registration information including registration number.                                                                                                                               | NA                       |
| Eligibility criteria               | 6  | Specify study characteristics (e.g., PICOS, length of follow-up) and report characteristics (e.g., years considered, language, publication status) used as criteria for eligibility, giving rationale.                                                                                                      | 6                        |
| Information sources                | 7  | Describe all information sources (e.g., databases with dates of coverage, contact with study authors to identify additional studies) in the search and date last searched.                                                                                                                                  | 6                        |
| Search                             | 8  | Present full electronic search strategy for at least one database, including any limits used, such that it could be repeated.                                                                                                                                                                               | Table 1                  |
| Study selection                    | 9  | State the process for selecting studies (i.e., screening, eligibility, included in systematic review, and, if applicable, included in the meta-analysis).                                                                                                                                                   | 5-7                      |
| Data collection process            | 10 | Describe method of data extraction from reports (e.g., piloted forms, independently, in duplicate) and any processes for obtaining and confirming data from investigators.                                                                                                                                  | 7                        |
| Data items                         | 11 | List and define all variables for which data were sought (e.g., PICOS, funding sources) and any assumptions and simplifications made.                                                                                                                                                                       | 7                        |
| Risk of bias in individual studies | 12 | Describe methods used for assessing risk of bias of individual studies (including specification of whether this was done at the study or outcome level), and how this information is to be used in any data synthesis.                                                                                      | 7                        |
| Summary measures                   | 13 | State the principal summary measures (e.g., risk ratio, difference in means).                                                                                                                                                                                                                               | 7, but not meta-analysis |





# PRISMA 2009 Checklist

|                      |    |                                                                                                                                                           |                         |
|----------------------|----|-----------------------------------------------------------------------------------------------------------------------------------------------------------|-------------------------|
| Synthesis of results | 14 | Describe the methods of handling data and combining results of studies, if done, including measures of consistency (e.g., $I^2$ ) for each meta-analysis. | 7, but no meta-analysis |
|----------------------|----|-----------------------------------------------------------------------------------------------------------------------------------------------------------|-------------------------|

Page 1 of 2

| Section/topic                 | #  | Checklist item                                                                                                                                                                                           | Reported on page #                  |
|-------------------------------|----|----------------------------------------------------------------------------------------------------------------------------------------------------------------------------------------------------------|-------------------------------------|
| Risk of bias across studies   | 15 | Specify any assessment of risk of bias that may affect the cumulative evidence (e.g., publication bias, selective reporting within studies).                                                             | NA, no meta-analysis                |
| Additional analyses           | 16 | Describe methods of additional analyses (e.g., sensitivity or subgroup analyses, meta-regression), if done, indicating which were pre-specified.                                                         | NA, no meta-analysis                |
| <b>RESULTS</b>                |    |                                                                                                                                                                                                          |                                     |
| Study selection               | 17 | Give numbers of studies screened, assessed for eligibility, and included in the review, with reasons for exclusions at each stage, ideally with a flow diagram.                                          | 7-8, Figure 2, Supplementary file 1 |
| Study characteristics         | 18 | For each study, present characteristics for which data were extracted (e.g., study size, PICOS, follow-up period) and provide the citations.                                                             | Tables 2-5                          |
| Risk of bias within studies   | 19 | Present data on risk of bias of each study and, if available, any outcome level assessment (see item 12).                                                                                                | 8, Supplementary file 3             |
| Results of individual studies | 20 | For all outcomes considered (benefits or harms), present, for each study: (a) simple summary data for each intervention group (b) effect estimates and confidence intervals, ideally with a forest plot. | Tables 2-5, no meta-analysis        |
| Synthesis of results          | 21 | Present results of each meta-analysis done, including confidence intervals and measures of consistency.                                                                                                  | NA, no meta-analysis                |
| Risk of bias across studies   | 22 | Present results of any assessment of risk of bias across studies (see Item 15).                                                                                                                          | NA, no meta-analysis                |
| Additional analysis           | 23 | Give results of additional analyses, if done (e.g., sensitivity or subgroup analyses, meta-regression [see Item 16]).                                                                                    | NA, no meta-analysis                |
| <b>DISCUSSION</b>             |    |                                                                                                                                                                                                          |                                     |
| Summary of evidence           | 24 | Summarize the main findings including the strength of evidence for each main outcome; consider their relevance to key groups (e.g., healthcare providers, users, and policy makers).                     | 10                                  |
| Limitations                   | 25 | Discuss limitations at study and outcome level (e.g., risk of bias), and at review-level (e.g., incomplete retrieval of identified research, reporting bias).                                            | 11-12                               |



# PRISMA 2009 Checklist

|                |    |                                                                                                                                            |       |
|----------------|----|--------------------------------------------------------------------------------------------------------------------------------------------|-------|
| Conclusions    | 26 | Provide a general interpretation of the results in the context of other evidence, and implications for future research.                    | 13-15 |
| <b>FUNDING</b> |    |                                                                                                                                            |       |
| Funding        | 27 | Describe sources of funding for the systematic review and other support (e.g., supply of data); role of funders for the systematic review. | 15    |

From: Moher D, Liberati A, Tetzlaff J, Altman DG, The PRISMA Group (2009). Preferred Reporting Items for Systematic Reviews and Meta-Analyses: The PRISMA Statement. PLoS Med 6(7): e1000097. doi:10.1371/journal.pmed1000097

For more information, visit: [www.prisma-statement.org](http://www.prisma-statement.org).

Page 2 of 2

1  
2  
3  
4  
5  
6  
7  
8  
9  
10  
11  
12  
13  
14  
15  
16  
17  
18  
19  
20  
21  
22  
23  
24  
25  
26  
27  
28  
29  
30  
31  
32  
33  
34  
35  
36  
37  
38  
39  
40  
41  
42  
43  
44  
45  
46

**Supplementary file 6. Study-level risk of bias assessment**

Green = high quality (low risk of bias); Amber = moderate quality (moderate risk of bias) or unknown; Red = low quality (high risk of bias)

| First author, year   | Selection bias                 | Selection bias    | Chance                | Detection bias   | Detection bias  | Detection/Reporting bias | Reporting bias       | Summary |
|----------------------|--------------------------------|-------------------|-----------------------|------------------|-----------------|--------------------------|----------------------|---------|
|                      | Participant representativeness | Group equivalence | Sample size rationale | Exposure measure | Outcome measure | Appropriate analysis     | Conflict of interest |         |
| Ades, 2013           | Green                          | Amber             | Green                 | Green            | Green           | Green                    | Green                | Green   |
| Adeyi, 1997          | Green                          | Amber             | Amber                 | Green            | Green           | Green                    | Green                | Green   |
| Akinci, 2014         | Green                          | Amber             | Amber                 | Green            | Green           | Green                    | Amber                | Amber   |
| Alvarez-Dardet, 2006 | Green                          | Amber             | Green                 | Green            | Green           | Green                    | Green                | Green   |
| Avendano, 2009       | Green                          | Amber             | Amber                 | Green            | Green           | Green                    | Amber                | Amber   |
| Bambra, 2014         | Green                          | Amber             | Green                 | Green            | Green           | Green                    | Green                | Green   |
| Bambra, 2009         | Green                          | Amber             | Amber                 | Green            | Green           | Green                    | Amber                | Amber   |
| Bambra, 2009         | Green                          | Amber             | Amber                 | Green            | Green           | Green                    | Green                | Green   |
| Bambra, 2006         | Green                          | Amber             | Amber                 | Green            | Green           | Green                    | Amber                | Amber   |
| Bambra, 2005         | Green                          | Amber             | Amber                 | Green            | Green           | Green                    | Amber                | Amber   |
| Batniji, 2014        | Green                          | Amber             | Green                 | Green            | Green           | Green                    | Green                | Green   |
| Baum, 2003           | Green                          | Amber             | Amber                 | Green            | Green           | Green                    | Amber                | Amber   |

| First author, year | Selection bias                 | Selection bias    | Chance                | Detection bias   | Detection bias  | Detection/Reporting bias | Reporting bias       | Summary |
|--------------------|--------------------------------|-------------------|-----------------------|------------------|-----------------|--------------------------|----------------------|---------|
|                    | Participant representativeness | Group equivalence | Sample size rationale | Exposure measure | Outcome measure | Appropriate analysis     | Conflict of interest |         |
| Bergh, 2010        |                                |                   |                       |                  |                 |                          |                      |         |
| Besley, 2006       |                                |                   |                       |                  |                 |                          |                      |         |
| Bosdriesz, 2015    |                                |                   |                       |                  |                 |                          |                      |         |
| Borrell, 2009      |                                |                   |                       |                  |                 |                          |                      |         |
| Bozorgmehr, 2014   |                                |                   |                       |                  |                 |                          |                      |         |
| Bradley, 2011      |                                |                   |                       |                  |                 |                          |                      |         |
| Brandt, 2014       |                                |                   |                       |                  |                 |                          |                      |         |
| Bremberg, 2016     |                                |                   |                       |                  |                 |                          |                      |         |
| Burroway, 2016     |                                |                   |                       |                  |                 |                          |                      |         |
| Burstrom, 2010     |                                |                   |                       |                  |                 |                          |                      |         |
| Cereseto, 1986     |                                |                   |                       |                  |                 |                          |                      |         |
| Chuang, 2013       |                                |                   |                       |                  |                 |                          |                      |         |
| Chuang, 2013       |                                |                   |                       |                  |                 |                          |                      |         |

1  
2  
3  
4  
5  
6  
7  
8  
9  
10  
11  
12  
13  
14  
15  
16  
17  
18  
19  
20  
21  
22  
23  
24  
25  
26  
27  
28  
29  
30  
31  
32  
33  
34  
35  
36  
37  
38  
39  
40  
41  
42  
43  
44  
45  
46

| First author, year | Selection bias                 | Selection bias    | Chance                | Detection bias   | Detection bias  | Detection/Reporting bias | Reporting bias       | Summary |
|--------------------|--------------------------------|-------------------|-----------------------|------------------|-----------------|--------------------------|----------------------|---------|
|                    | Participant representativeness | Group equivalence | Sample size rationale | Exposure measure | Outcome measure | Appropriate analysis     | Conflict of interest |         |
| Chung, 2006        | Green                          | Yellow            | Yellow                | Green            | Green           | Green                    | Yellow               | Yellow  |
| Conley, 2001       | Green                          | Yellow            | Yellow                | Green            | Green           | Green                    | Yellow               | Yellow  |
| Copeland, 2015     | Yellow                         | Yellow            | Yellow                | Green            | Green           | Green                    | Green                | Yellow  |
| Correa, 1992       | Green                          | Yellow            | Green                 | Green            | Green           | Green                    | Yellow               | Green   |
| Corsi, 2014        | Green                          | Yellow            | Green                 | Green            | Green           | Green                    | Green                | Green   |
| Costa-Font, 2016   | Green                          | Yellow            | Yellow                | Green            | Green           | Green                    | Green                | Green   |
| Craveiro, 2017     | Green                          | Yellow            | Yellow                | Green            | Green           | Green                    | Green                | Green   |
| Cross, 2009        | Yellow                         | Yellow            | Yellow                | Green            | Green           | Green                    | Green                | Yellow  |
| De Vogli, 2014     | Green                          | Yellow            | Yellow                | Green            | Green           | Green                    | Green                | Green   |
| Dahl, 2013         | Green                          | Yellow            | Yellow                | Green            | Green           | Green                    | Yellow               | Yellow  |
| Deeming, 2012      | Green                          | Yellow            | Yellow                | Green            | Green           | Green                    | Yellow               | Yellow  |
| Devaux, 2015       | Green                          | Yellow            | Yellow                | Green            | Green           | Green                    | Green                | Green   |
| Dietrich, 2015     | Green                          | Yellow            | Yellow                | Green            | Green           | Green                    | Yellow               | Yellow  |
| Doherty, 2010      | Green                          | Yellow            | Yellow                | Green            | Green           | Green                    | Green                | Green   |

| First author, year  | Selection bias                 | Selection bias    | Chance                | Detection bias   | Detection bias  | Detection/Reporting bias | Reporting bias       | Summary |
|---------------------|--------------------------------|-------------------|-----------------------|------------------|-----------------|--------------------------|----------------------|---------|
|                     | Participant representativeness | Group equivalence | Sample size rationale | Exposure measure | Outcome measure | Appropriate analysis     | Conflict of interest |         |
| Dujardin, 2011      |                                |                   |                       |                  |                 |                          |                      |         |
| Eikemo, 2008        |                                |                   |                       |                  |                 |                          |                      |         |
| Eikemo, 2008        |                                |                   |                       |                  |                 |                          |                      |         |
| Elgar, 2011         |                                |                   |                       |                  |                 |                          |                      |         |
| Elola, 1995         |                                |                   |                       |                  |                 |                          |                      |         |
| Engster, 2011       |                                |                   |                       |                  |                 |                          |                      |         |
| Esmaeli, 2011       |                                |                   |                       |                  |                 |                          |                      |         |
| Espelt, 2008        |                                |                   |                       |                  |                 |                          |                      |         |
| Esser, 2010         |                                |                   |                       |                  |                 |                          |                      |         |
| Estimé, 2014        |                                |                   |                       |                  |                 |                          |                      |         |
| Fan, 2015           |                                |                   |                       |                  |                 |                          |                      |         |
| Farfan-Portet, 2010 |                                |                   |                       |                  |                 |                          |                      |         |
| Fayissa, 2001       |                                |                   |                       |                  |                 |                          |                      |         |
| Foubert, 2014       |                                |                   |                       |                  |                 |                          |                      |         |

1  
2  
3  
4  
5  
6  
7  
8  
9  
10  
11  
12  
13  
14  
15  
16  
17  
18  
19  
20  
21  
22  
23  
24  
25  
26  
27  
28  
29  
30  
31  
32  
33  
34  
35  
36  
37  
38  
39  
40  
41  
42  
43  
44  
45  
46

| First author, year | Selection bias                 | Selection bias    | Chance                | Detection bias   | Detection bias  | Detection/Reporting bias | Reporting bias       | Summary |
|--------------------|--------------------------------|-------------------|-----------------------|------------------|-----------------|--------------------------|----------------------|---------|
|                    | Participant representativeness | Group equivalence | Sample size rationale | Exposure measure | Outcome measure | Appropriate analysis     | Conflict of interest |         |
| Frey, 1999         |                                |                   |                       |                  |                 |                          |                      |         |
| Fritzell, 2012     |                                |                   |                       |                  |                 |                          |                      |         |
| Fritzell, 2013     |                                |                   |                       |                  |                 |                          |                      |         |
| Fumagalli, 2013    |                                |                   |                       |                  |                 |                          |                      |         |
| Gauri, 2002        |                                |                   |                       |                  |                 |                          |                      |         |
| Gerring, 2008      |                                |                   |                       |                  |                 |                          |                      |         |
| Gesthuizen, 2012   |                                |                   |                       |                  |                 |                          |                      |         |
| Ghobarah, 2004     |                                |                   |                       |                  |                 |                          |                      |         |
| Gilligan, 2015     |                                |                   |                       |                  |                 |                          |                      |         |
| Gizeles, 2009      |                                |                   |                       |                  |                 |                          |                      |         |
| Glass, 2016        |                                |                   |                       |                  |                 |                          |                      |         |
| Goryakin, 2015     |                                |                   |                       |                  |                 |                          |                      |         |
| Granados, 2010     |                                |                   |                       |                  |                 |                          |                      |         |

|    |                    |  |  |  |  |  |  |  |
|----|--------------------|--|--|--|--|--|--|--|
| 1  |                    |  |  |  |  |  |  |  |
| 2  |                    |  |  |  |  |  |  |  |
| 3  |                    |  |  |  |  |  |  |  |
| 4  | Jorgenson,<br>2009 |  |  |  |  |  |  |  |
| 5  | Jorgenson,<br>2009 |  |  |  |  |  |  |  |
| 6  | Jorgenson,<br>2009 |  |  |  |  |  |  |  |
| 7  | Karim,<br>2010     |  |  |  |  |  |  |  |
| 8  | Karim,<br>2010     |  |  |  |  |  |  |  |
| 9  | Karim,<br>2010     |  |  |  |  |  |  |  |
| 10 | Kick, 1990         |  |  |  |  |  |  |  |
| 11 | Kick, 1990         |  |  |  |  |  |  |  |
| 12 | Klenk, 2016        |  |  |  |  |  |  |  |
| 13 | Klenk, 2016        |  |  |  |  |  |  |  |
| 14 | Klomp,<br>2008     |  |  |  |  |  |  |  |
| 15 |                    |  |  |  |  |  |  |  |
| 16 |                    |  |  |  |  |  |  |  |
| 17 |                    |  |  |  |  |  |  |  |
| 18 |                    |  |  |  |  |  |  |  |
| 19 |                    |  |  |  |  |  |  |  |
| 20 |                    |  |  |  |  |  |  |  |
| 21 |                    |  |  |  |  |  |  |  |
| 22 |                    |  |  |  |  |  |  |  |
| 23 |                    |  |  |  |  |  |  |  |
| 24 |                    |  |  |  |  |  |  |  |
| 25 |                    |  |  |  |  |  |  |  |
| 26 |                    |  |  |  |  |  |  |  |
| 27 |                    |  |  |  |  |  |  |  |
| 28 |                    |  |  |  |  |  |  |  |
| 29 |                    |  |  |  |  |  |  |  |
| 30 |                    |  |  |  |  |  |  |  |
| 31 |                    |  |  |  |  |  |  |  |
| 32 |                    |  |  |  |  |  |  |  |
| 33 |                    |  |  |  |  |  |  |  |
| 34 |                    |  |  |  |  |  |  |  |
| 35 |                    |  |  |  |  |  |  |  |
| 36 |                    |  |  |  |  |  |  |  |
| 37 |                    |  |  |  |  |  |  |  |
| 38 |                    |  |  |  |  |  |  |  |
| 39 |                    |  |  |  |  |  |  |  |
| 40 |                    |  |  |  |  |  |  |  |
| 41 |                    |  |  |  |  |  |  |  |
| 42 |                    |  |  |  |  |  |  |  |
| 43 |                    |  |  |  |  |  |  |  |
| 44 |                    |  |  |  |  |  |  |  |
| 45 |                    |  |  |  |  |  |  |  |
| 46 |                    |  |  |  |  |  |  |  |



1  
2  
3  
4  
5  
6  
7  
8  
9  
10  
11  
12  
13  
14  
15  
16  
17  
18  
19  
20  
21  
22  
23  
24  
25  
26  
27  
28  
29  
30  
31  
32  
33  
34  
35  
36  
37  
38  
39  
40  
41  
42  
43  
44  
45  
46

| First author, year     | Selection bias                 | Selection bias    | Chance                | Detection bias   | Detection bias  | Detection/Reporting bias | Reporting bias       | Summary |
|------------------------|--------------------------------|-------------------|-----------------------|------------------|-----------------|--------------------------|----------------------|---------|
|                        | Participant representativeness | Group equivalence | Sample size rationale | Exposure measure | Outcome measure | Appropriate analysis     | Conflict of interest |         |
| Krueger, 2015          |                                |                   |                       |                  |                 |                          |                      |         |
| Kudamatsu, 2012        |                                |                   |                       |                  |                 |                          |                      |         |
| Kuovo, 2015            |                                |                   |                       |                  |                 |                          |                      |         |
| Lahelma, 1994          |                                |                   |                       |                  |                 |                          |                      |         |
| Lake, 2001             |                                |                   |                       |                  |                 |                          |                      |         |
| Lena, 1993             |                                |                   |                       |                  |                 |                          |                      |         |
| Levecque, 2011         |                                |                   |                       |                  |                 |                          |                      |         |
| Levecque, 2015         |                                |                   |                       |                  |                 |                          |                      |         |
| Levine, 2006           |                                |                   |                       |                  |                 |                          |                      |         |
| Lin, 2012              |                                |                   |                       |                  |                 |                          |                      |         |
| Lin, 2014              |                                |                   |                       |                  |                 |                          |                      |         |
| London, 1990           |                                |                   |                       |                  |                 |                          |                      |         |
| López-Casasnovas, 2014 |                                |                   |                       |                  |                 |                          |                      |         |
| Lundberg, 2008         |                                |                   |                       |                  |                 |                          |                      |         |

| First author, year    | Selection bias                 | Selection bias    | Chance                | Detection bias   | Detection bias  | Detection/Reporting bias | Reporting bias       | Summary |
|-----------------------|--------------------------------|-------------------|-----------------------|------------------|-----------------|--------------------------|----------------------|---------|
|                       | Participant representativeness | Group equivalence | Sample size rationale | Exposure measure | Outcome measure | Appropriate analysis     | Conflict of interest |         |
| Mackenbach, 2013      |                                |                   |                       |                  |                 |                          |                      |         |
| Mackenbach, 2013      |                                |                   |                       |                  |                 |                          |                      |         |
| Mackenbach, 2013      |                                |                   |                       |                  |                 |                          |                      |         |
| Martens, 2010         |                                |                   |                       |                  |                 |                          |                      |         |
| Maynard, 2015         |                                |                   |                       |                  |                 |                          |                      |         |
| Maynard, 2016         |                                |                   |                       |                  |                 |                          |                      |         |
| Miething, 2013        |                                |                   |                       |                  |                 |                          |                      |         |
| Menon-Johansson, 2005 |                                |                   |                       |                  |                 |                          |                      |         |
| Milner, 2011          |                                |                   |                       |                  |                 |                          |                      |         |
| Minagawa, 2013        |                                |                   |                       |                  |                 |                          |                      |         |
| Moon, 1985            |                                |                   |                       |                  |                 |                          |                      |         |
| Moor, 2013            |                                |                   |                       |                  |                 |                          |                      |         |
| Moore, 2006           |                                |                   |                       |                  |                 |                          |                      |         |

1  
2  
3  
4  
5  
6  
7  
8  
9  
10  
11  
12  
13  
14  
15  
16  
17  
18  
19  
20  
21  
22  
23  
24  
25  
26  
27  
28  
29  
30  
31  
32  
33  
34  
35  
36  
37  
38  
39  
40  
41  
42  
43  
44  
45  
46

| First author, year | Selection bias                 | Selection bias    | Chance                | Detection bias   | Detection bias  | Detection/Reporting bias | Reporting bias       | Summary |
|--------------------|--------------------------------|-------------------|-----------------------|------------------|-----------------|--------------------------|----------------------|---------|
|                    | Participant representativeness | Group equivalence | Sample size rationale | Exposure measure | Outcome measure | Appropriate analysis     | Conflict of interest |         |
| Muldoon, 2011      | Green                          | Yellow            | Yellow                | Green            | Green           | Green                    | Green                | Green   |
| Muntaner, 2017     | Green                          | Yellow            | Green                 | Green            | Green           | Green                    | Green                | Green   |
| Muntaner, 2002     | Green                          | Yellow            | Yellow                | Green            | Green           | Green                    | Yellow               | Yellow  |
| Navarro, 2006      | Green                          | Yellow            | Yellow                | Green            | Green           | Green                    | Green                | Green   |
| Navarro, 2003      | Green                          | Yellow            | Yellow                | Green            | Green           | Green                    | Yellow               | Yellow  |
| Navarro, 2001      | Green                          | Yellow            | Yellow                | Green            | Green           | Green                    | Yellow               | Yellow  |
| Navia, 2003        | Green                          | Yellow            | Yellow                | Green            | Green           | Green                    | Yellow               | Yellow  |
| Nelson, 2014       | Green                          | Yellow            | Yellow                | Green            | Green           | Green                    | Green                | Green   |
| Norden mark, 2006  | Yellow                         | Yellow            | Yellow                | Green            | Green           | Green                    | Yellow               | Yellow  |
| Novignon, 2012     | Green                          | Yellow            | Green                 | Green            | Green           | Green                    | Green                | Green   |
| Oberlander, 2017   | Green                          | Yellow            | Yellow                | Green            | Green           | Green                    | Yellow               | Yellow  |
| Olafsdottir, 2007  | Yellow                         | Yellow            | Yellow                | Green            | Green           | Green                    | Yellow               | Yellow  |
| Olsen, 2007        | Green                          | Yellow            | Yellow                | Green            | Green           | Green                    | Green                | Green   |
| Oster, 2012        | Green                          | Yellow            | Green                 | Green            | Green           | Green                    | Yellow               | Green   |

| First author, year  | Selection bias                 | Selection bias    | Chance                | Detection bias   | Detection bias  | Detection/Reporting bias | Reporting bias       | Summary |
|---------------------|--------------------------------|-------------------|-----------------------|------------------|-----------------|--------------------------|----------------------|---------|
|                     | Participant representativeness | Group equivalence | Sample size rationale | Exposure measure | Outcome measure | Appropriate analysis     | Conflict of interest |         |
| Owen, 2007          |                                |                   |                       |                  |                 |                          |                      |         |
| Palència, 2013      |                                |                   |                       |                  |                 |                          |                      |         |
| Pickett, 2007       |                                |                   |                       |                  |                 |                          |                      |         |
| Pillai, 2006        |                                |                   |                       |                  |                 |                          |                      |         |
| Pinzón-Flórez, 2015 |                                |                   |                       |                  |                 |                          |                      |         |
| Platts, 2015        |                                |                   |                       |                  |                 |                          |                      |         |
| Ploubidis, 2012     |                                |                   |                       |                  |                 |                          |                      |         |
| Popham, 2013        |                                |                   |                       |                  |                 |                          |                      |         |
| Raphael, 2004       |                                |                   |                       |                  |                 |                          |                      |         |
| Reeves, 2014        |                                |                   |                       |                  |                 |                          |                      |         |
| Richter, 2012       |                                |                   |                       |                  |                 |                          |                      |         |
| Ross, 2006          |                                |                   |                       |                  |                 |                          |                      |         |
| Rostila, 2007       |                                |                   |                       |                  |                 |                          |                      |         |
| Rovny, 2011         |                                |                   |                       |                  |                 |                          |                      |         |

1  
2  
3  
4  
5  
6  
7  
8  
9  
10  
11  
12  
13  
14  
15  
16  
17  
18  
19  
20  
21  
22  
23  
24  
25  
26  
27  
28  
29  
30  
31  
32  
33  
34  
35  
36  
37  
38  
39  
40  
41  
42  
43  
44  
45  
46

| First author, year   | Selection bias                 | Selection bias    | Chance                | Detection bias   | Detection bias  | Detection/Reporting bias | Reporting bias       | Summary |
|----------------------|--------------------------------|-------------------|-----------------------|------------------|-----------------|--------------------------|----------------------|---------|
|                      | Participant representativeness | Group equivalence | Sample size rationale | Exposure measure | Outcome measure | Appropriate analysis     | Conflict of interest |         |
| Sacker, 2011         |                                |                   |                       |                  |                 |                          |                      |         |
| Safaei, 2006         |                                |                   |                       |                  |                 |                          |                      |         |
| Sanders, 2009        |                                |                   |                       |                  |                 |                          |                      |         |
| Sarti, 2013          |                                |                   |                       |                  |                 |                          |                      |         |
| Sekine, 2009         |                                |                   |                       |                  |                 |                          |                      |         |
| Shandra, 2010        |                                |                   |                       |                  |                 |                          |                      |         |
| Shandra, 2004        |                                |                   |                       |                  |                 |                          |                      |         |
| Shen, 2001           |                                |                   |                       |                  |                 |                          |                      |         |
| Shen, 1997           |                                |                   |                       |                  |                 |                          |                      |         |
| Shim, 2015           |                                |                   |                       |                  |                 |                          |                      |         |
| Stavrova, 2011       |                                |                   |                       |                  |                 |                          |                      |         |
| Stroup, 2007         |                                |                   |                       |                  |                 |                          |                      |         |
| Stuckler, 2010       |                                |                   |                       |                  |                 |                          |                      |         |
| Tsai, 2006           |                                |                   |                       |                  |                 |                          |                      |         |
| Van der Heuvel, 2013 |                                |                   |                       |                  |                 |                          |                      |         |

| First author, year  | Selection bias                 | Selection bias    | Chance                | Detection bias   | Detection bias  | Detection/Reporting bias | Reporting bias       | Summary |
|---------------------|--------------------------------|-------------------|-----------------------|------------------|-----------------|--------------------------|----------------------|---------|
|                     | Participant representativeness | Group equivalence | Sample size rationale | Exposure measure | Outcome measure | Appropriate analysis     | Conflict of interest |         |
| Van Tuyckom, 2011   | Green                          | Amber             | Green                 | Green            | Green           | Green                    | Green                | Green   |
| Vahid Shahidi, 2016 | Green                          | Amber             | Amber                 | Green            | Green           | Green                    | Green                | Green   |
| Veenhoven, 2000     | Green                          | Amber             | Amber                 | Green            | Green           | Green                    | Amber                | Amber   |
| Veenhoven, 1995     | Green                          | Amber             | Amber                 | Green            | Green           | Green                    | Amber                | Amber   |
| Vöörmann, 2013      | Amber                          | Amber             | Amber                 | Green            | Green           | Green                    | Amber                | Amber   |
| Wejnert, 2008       | Green                          | Amber             | Amber                 | Green            | Green           | Green                    | Amber                | Amber   |
| Whitehead, 2000     | Amber                          | Amber             | Amber                 | Green            | Green           | Green                    | Green                | Amber   |
| Witvliet, 2013      | Green                          | Amber             | Amber                 | Green            | Green           | Green                    | Green                | Green   |
| Wu, 2007            | Green                          | Amber             | Amber                 | Green            | Green           | Green                    | Amber                | Amber   |
| York, 2014          | Green                          | Amber             | Green                 | Green            | Green           | Green                    | Amber                | Green   |
| Zambon, 2006        | Green                          | Amber             | Amber                 | Green            | Green           | Green                    | Amber                | Amber   |
| Zweifel, 2000       | Green                          | Amber             | Amber                 | Green            | Green           | Green                    | Amber                | Amber   |

Green = high quality (low risk of bias); Amber = moderate quality (moderate risk of bias) or unknown; Red = low quality (high risk of bias)

1  
2  
3  
4  
5  
6  
7  
8  
9  
10  
11  
12  
13  
14  
15  
16  
17  
18  
19  
20  
21  
22  
23  
24  
25  
26  
27  
28  
29  
30  
31  
32  
33  
34  
35  
36  
37  
38  
39  
40  
41  
42  
43  
44  
45  
46  
47

**Supplementary file 7. Table of study-level characteristics and results for welfare state**

| Serial number                       | Authors, publication year | Years of study | Level of analysis | Assessment of economic factors | Setting                                    | Political exposures  | Population health outcomes                           | Result category |
|-------------------------------------|---------------------------|----------------|-------------------|--------------------------------|--------------------------------------------|----------------------|------------------------------------------------------|-----------------|
| <b>Studies from the 2010 review</b> |                           |                |                   |                                |                                            |                      |                                                      |                 |
| 1                                   | Avendano et al, 2009      | 2004-2007      | Ecological        | Yes                            | 11 countries from 3 European regions       | Welfare regimes      | Chronic conditions, self-reported health, depression | Positive        |
| 2                                   | Bambra, 2005              | 1997-1999      | Ecological        | No                             | 18 OECD countries                          | Welfare regimes      | Health care index                                    | Positive        |
| 3                                   | Bambra, 2006              | 1980-1998      | Ecological        | No                             | 18 OECD countries                          | Welfare regimes      | Infant mortality                                     | Positive        |
| 4                                   | Bambra and Eikemo, 2009   | 2002-2004      | Individual        | No                             | 37,499 persons from 21 European countries  | Welfare regimes      | Self-reported health, long-standing illness          | Positive        |
| 5                                   | Bambra et al, 2009        | 1998-2004      | Individual        | No                             | 118,245 persons from 13 European countries | Welfare regimes      | Self-rated health                                    | Inconclusive    |
| 6                                   | Burstrom et al, 2010      | 1999-2001      | Individual        | Yes                            | 28,485 persons from                        | Family policy models | Self-rated health, limiting long-                    | Positive        |

|    |                           |           |            |     |                                            |                                         |                                                                      |              |
|----|---------------------------|-----------|------------|-----|--------------------------------------------|-----------------------------------------|----------------------------------------------------------------------|--------------|
|    |                           |           |            |     | Italy, Sweden and Britain                  |                                         | standing illness                                                     |              |
| 7  | Chung and Muntaner, 2006  | 1960-1994 | Ecological | Yes | 19 wealthy OECD countries                  | Public sector medical care              | Infant mortality rate, low birth weight, under-five mortality weight | Positive     |
| 8  | Chung and Muntaner, 2007  | 1960-1998 | Ecological | Yes | 18 wealthy countries                       | Welfare regimes                         | Infant mortality rate, low birth weight                              | Positive     |
| 9  | Conley and Springer, 2001 | 1960-1992 | Ecological | Yes | 19 OECD countries                          | Welfare regimes, welfare state spending | Infant mortality                                                     | Positive     |
| 10 | Dahl et al, 2006          | 1970-2005 | Ecological | Yes | Up to 11 European countries                | Welfare regimes                         | Absolute and relative health inequalities                            | Inconclusive |
| 11 | Eikemo et al, 2008        | 2002-2004 | Individual | No  | 69, 821 persons from 23 European countries | Welfare regimes                         | Self-reported health, limiting longstanding illness                  | Inconclusive |
| 12 | Eikemo et al, 2008        | 2002-2004 | Individual | No  | 65, 065 persons from 21 European countries | Welfare regimes                         | Subjective poor health, limiting longstanding illness                | Positive     |
| 13 | Elola et al, 1995         | 1990-1991 | Ecological | Yes | 17 Western European countries              | Health care system                      | Infant mortality, life expectancy                                    | Positive     |



|    |                           |           |            |     |                                                             |                           |                                                                |              |
|----|---------------------------|-----------|------------|-----|-------------------------------------------------------------|---------------------------|----------------------------------------------------------------|--------------|
| 14 | Farfan-Portet et al, 2010 | 2001      | Individual | No  | 5,729,859 persons in Belgium and Britain                    | Welfare regimes           | Self-reported health                                           | Inconclusive |
| 15 | Fayissa, 2001             | 1993      | Ecological | Yes | 34 sub-Saharan African countries                            | Public health expenditure | Infant mortality, child mortality                              | Positive     |
| 16 | Grosse et al, 2010        | 2004      | Individual | No  | 38,122 persons from 24 European countries                   | Welfare regimes           | Perception of need for seeking primary health care             | Positive     |
| 17 | Karim, 2010               | 2003      | Ecological | Yes | 30 countries in Europe, North America, Australia and Asia   | Welfare regimes           | Infant mortality, life expectancy                              | Positive     |
| 18 | Klomp and de Haan, 2008   | 2000-2005 | Ecological | Yes | 101 low, middle and high income countries                   | Governance                | 19 mortality, disease, sickness indicators                     | Positive     |
| 19 | Lahelma and Arber, 1994   | 1985-1987 | Individual | No  | Ca. 30,000 persons from Britain, Finland, Norway and Sweden | Welfare regimes           | Limiting long-standing illness                                 | Negative     |
| 20 | Lundberg et al, 2008      | 1950-2000 | Ecological | Yes | 18 OECD countries                                           | Family policy models      | Infant mortality, mortality among those aged 30-59 and over 65 | Positive     |

|    |                          |           |            |     |                                                                 |                           |                                                                                              |              |
|----|--------------------------|-----------|------------|-----|-----------------------------------------------------------------|---------------------------|----------------------------------------------------------------------------------------------|--------------|
| 21 | Menon-Johansson, 2005    | 2002      | Ecological | Yes | 149 countries                                                   | Governance                | HIV prevalence                                                                               | Positive     |
| 22 | Muntaner et al, 2006     | 1980-1995 | Individual | Yes | Sweden, Italy, and England and Wales (combined)                 | Welfare regimes           | Mortality level per occupational class, population attributable risk, index of dissimilarity | Inconclusive |
| 23 | Nordenmark et al, 2006   | 1992-2001 | Individual | Yes | 3442 persons from Sweden, Ireland and Great Britain             | Unemployment benefit type | Psychological distress                                                                       | Positive     |
| 24 | Ouweneel, 2002           | 1980-1990 | Ecological | Yes | 42 'first-world, second-world and third-world' countries        | Social security system    | Self-rated health                                                                            | Inconclusive |
| 25 | Raphael and Bryant, 2004 | 1999      | Ecological | Yes | 5 countries (Canada, Denmark, Sweden, UK, US)                   | Welfare state spending    | Life expectancy                                                                              | Positive     |
| 26 | Rostila, 2007            | 2002-2003 | Individual | Yes | 36,489 persons in 20 European countries                         | Welfare regimes           | Self-rated health, life expectancy                                                           | Positive     |
| 27 | Sanders et al, 2009      | 1998-2002 | Individual | Yes | 12,888 persons in 4 countries (UK, Finland, Germany, Australia) | Welfare regimes           | Oral health                                                                                  | Positive     |

1  
2  
3  
4  
5  
6  
7  
8  
9  
10  
11  
12  
13  
14  
15  
16  
17  
18  
19  
20  
21  
22  
23  
24  
25  
26  
27  
28  
29  
30  
31  
32  
33  
34  
35  
36  
37  
38  
39  
40  
41  
42  
43  
44  
45  
46  
47

|                                |                              |           |            |     |                                                                |                           |                                                                          |              |
|--------------------------------|------------------------------|-----------|------------|-----|----------------------------------------------------------------|---------------------------|--------------------------------------------------------------------------|--------------|
| 28                             | Sekine et al, 2009           | 1991-2003 | Individual | No  | 17,801 persons in Britain, Finland and Japan                   | Welfare regimes           | The Short-Form 36: physical and mental health functioning                | Positive     |
| 29                             | Veenhoven and Ouweneel, 1995 | 1965-1985 | Ecological | Yes | Up to 97 rich and poor countries                               | Welfare state expenditure | Life expectancy                                                          | Positive     |
| 30                             | Veenhoven, 2000              | 1980-1990 | Ecological | Yes | 40 countries                                                   | Welfare state expenditure | Life expectancy, self-rated health                                       | Inconclusive |
| 31                             | Whitehead et al, 2000        | 1979-1996 | Individual | No  | 80,792 persons from Britain and Sweden                         | Social benefit system     | Self-perceived health, limiting longstanding illness                     | Inconclusive |
| 32                             | Zambon et al, 2006           | 2001-2002 | Individual | Yes | 160, 325 persons from 32 European and North American countries | Welfare regimes           | Self-reported health, well-being, health symptom load, health behaviours | Positive     |
| <b>Studies from our update</b> |                              |           |            |     |                                                                |                           |                                                                          |              |
| 33                             | Ades et al, 2013             | 2008-2012 | Ecological | Yes | 27 European Union countries                                    | Healthcare spending       | Cancer incidence and mortality                                           | Positive     |
| 34                             | Akinci et al, 2014           | 1990-2010 | Ecological | Yes | 19 Middle Eastern and North African countries                  | Healthcare spending       | Infant, under-5, and maternal mortality                                  | Positive     |

|    |                       |            |            |     |                                                    |                                                                                                  |                                                                                  |              |
|----|-----------------------|------------|------------|-----|----------------------------------------------------|--------------------------------------------------------------------------------------------------|----------------------------------------------------------------------------------|--------------|
| 35 | Bambra et al, 2014    | 2010       | Individual | Yes | 21,705 men and women from 27 European countries    | Welfare regime                                                                                   | Self-rated health                                                                | Inconclusive |
| 36 | Batniji et al, 2014   | 1980-2011  | Ecological | Yes | 22 Arab countries                                  | Governance                                                                                       | Mortality                                                                        | Positive     |
| 37 | Bentley et al, 2016   | 2001-2008  | Ecological | Yes | Australia and UK                                   | Housing benefit generosity                                                                       | Mental health                                                                    | Positive     |
| 38 | Bradley et al, 2011   | 2009       | Ecological | Yes | 30 OECD countries                                  | Healthcare spending, social care spending                                                        | Life expectancy, low birth weight, maternal mortality, potential life years lost | Positive     |
| 39 | Brandt and Hank, 2014 | Up to 2009 | Individual | No  | More than 13,000 people from 11 European countries | Welfare regimes                                                                                  | Self-rated health, job loss                                                      | Positive     |
| 40 | Bremberg, 2016        | 1990-2012  | Ecological | Yes | 28 OECD countries                                  | Family benefit spending, healthcare spending, government expenditure on research and development | Infant mortality                                                                 | Inconclusive |
| 41 | Copeland et al, 2015  | 1991-2010  | Individual | Yes | England (n = 217,514) and Sweden (n = 184, 428)    | Welfare regimes                                                                                  | Self-rated health, health inequalities                                           | Positive     |

|    |                             |           |            |     |                                                       |                                                             |                                                                                                  |          |
|----|-----------------------------|-----------|------------|-----|-------------------------------------------------------|-------------------------------------------------------------|--------------------------------------------------------------------------------------------------|----------|
| 42 | Corsi and Subramanian, 2014 | 1990-2012 | Ecological | Yes | 35 sub-Saharan African countries                      | Maternal and child health service coverage                  | Under-5 mortality                                                                                | Positive |
| 43 | Craveiro, 2017              | 2010-2011 | Individual | Yes | 53,615 individuals from 15 European countries         | Welfare regimes                                             | Composite health measure derived from 3 indicators based on factor analysis, health inequalities | Positive |
| 44 | Dahl and van der Wel, 2013  | 2005      | Individual | Yes | Around 245,000 individuals from 18 European countries | National social expenditure                                 | Self-rated health, health inequalities                                                           | Positive |
| 45 | Deeming and Hayes, 2012     | 2000-2005 | Individual | Yes | Just under 30,000 individuals from OECD countries     | Welfare regimes                                             | Unhappiness                                                                                      | Positive |
| 46 | Devaux, 2015                | 2006-2009 | Individual | Yes | Participants from 18 OECD countries                   | Health care system                                          | Health inequalities                                                                              | Positive |
| 47 | Dragano et al, 2010         | 2004-2006 | Individual | Yes | 9917 older individuals from 12 European countries     | Welfare regimes, indicators from the EU Labour Force Survey | Depression (EURO-D and CES-D)                                                                    | Positive |

|    |                            |           |            |     |                                                       |                                                                                                     |                             |              |
|----|----------------------------|-----------|------------|-----|-------------------------------------------------------|-----------------------------------------------------------------------------------------------------|-----------------------------|--------------|
| 48 | Dujardin et al, 2011       | 2001      | Individual | Yes | 5729858 individuals from Belgium and Great Britain    | Home care policy system                                                                             | Health burden of care       | Positive     |
| 49 | Elgar et al, 2011          | 2006      | Individual | Yes | 48641 adults from 33 rich and middle-income countries | Healthcare spending                                                                                 | Homicide                    | Inconclusive |
| 50 | Engster and Stensöta, 2011 | 1995-2005 | Individual | Yes | Participants from 20 OECD countries                   | Family policy regime: family cash and tax benefits, paid parenting leave, public child care support | Child poverty and mortality | Positive     |
| 51 | Esmaeli et al, 2011        | 1996-2004 | Ecological | Yes | 24 Islamic countries                                  | Healthcare spending                                                                                 | Life expectancy             | Inconclusive |
| 52 | Esser and Palme, 2010      | 2002-2005 | Individual | Yes | 13 OECD countries                                     | Pension system                                                                                      | Self-rated health, WHO-5    | Positive     |
| 53 | Foubert et al, 2014        | 2002-2004 | Individual | Yes | 213764 individuals from 57 countries                  | Welfare regimes                                                                                     | Self-rated health           | Positive     |
| 54 | Fritzell et al, 2012       | 2000-2005 | Individual | No  | Randomly sampled British, Italian and Swedish mothers | Family policy model                                                                                 | Maternal health             | Negative     |
| 55 | Fritzell et al, 2013       | 1980-2005 | Ecological | Yes | Up to 25 countries per wave                           | Welfare regimes                                                                                     | Mortality                   | Positive     |

|    |                              |           |            |     |                                                    |                                               |                                                 |              |
|----|------------------------------|-----------|------------|-----|----------------------------------------------------|-----------------------------------------------|-------------------------------------------------|--------------|
| 56 | Gesthuizen et al, 2012       | 2002-2008 | Individual | Yes | Over 90,000 individuals from 32 European countries | Healthcare spending, modernised labour market | Self-rated health                               | Positive     |
| 57 | Gilligan and Skrepnek, 2015  | 1995-2010 | Ecological | Yes | 21 Eastern Mediterranean countries                 | Healthcare spending                           | Life expectancy                                 | Positive     |
| 58 | Glass et al, 2016            | 2006-2008 | Individual | Yes | 22 OECD countries                                  | Family policy                                 | Happiness                                       | Positive     |
| 59 | Granados, 2010               | 1950-2000 | Ecological | Yes | 8 European countries                               | Welfare regimes                               | Life expectancy, mortality, tobacco consumption | Inconclusive |
| 60 | Guarnizo-Herreño et al, 2013 | 2009      | Ecological | No  | 31 European countries                              | Welfare regimes                               | Oral health                                     | Positive     |
| 61 | Harding et al, 2013          | 1971-2006 | Ecological | No  | England and Wales, Italy and Finland               | Welfare regimes                               | Elder mortality                                 | Negative     |
| 62 | Hájek et al, 2012            | 1995-2008 | Ecological | Yes | 27 European Union countries                        | Healthcare spending                           | Life expectancy, standardised death rate        | Positive     |
| 63 | Hauck et al, 2016            | 1990-2012 | Ecological | Yes | 54 low-income studies                              | Healthcare spending                           | Life expectancy                                 | Inconclusive |
| 64 | Heijink et al, 2013          | 1996-2006 | Ecological | Yes | 14 Western countries                               | Healthcare spending                           | Avoidable mortality                             | Positive     |
| 65 | Hoffman, 2011                | 1980-2006 | Ecological | Yes | USA and Denmark                                    | Welfare system                                | Old-age mortality                               | Negative     |
| 66 | Kuovo and Räsänen, 2015      | 2010      | Individual | No  | 10,046 individuals from Finland, Britain,          | Welfare system                                | Subjective well-being                           | Positive     |

|    |                                       |           |            |     |                                                       |                                                   |                                           |              |
|----|---------------------------------------|-----------|------------|-----|-------------------------------------------------------|---------------------------------------------------|-------------------------------------------|--------------|
|    |                                       |           |            |     | Germany and Greece                                    |                                                   |                                           |              |
| 67 | Levecque et al, 2011                  | 2006-2007 | Individual | Yes | 41686 people from 23 European countries               | Welfare regimes, welfare state generosity         | Depression (CES-D)                        | Positive     |
| 68 | Levecque et al, 2015                  | 2006-2007 | Individual | No  | 37076 people from 20 European countries               | Migrant integration social policy                 | Depression (CES-D)                        | Inconclusive |
| 69 | Lin et al, 2014                       | 1996-2010 | Ecological | Yes | 149 countries                                         | Governance                                        | Child mortality                           | Positive     |
| 70 | López-Casasnovas and Soley-Bori, 2014 | 1980-2010 | Ecological | Yes | 32 OECD countries                                     | Healthcare and social spending, healthcare system | Health Human Development Index            | Positive     |
| 71 | McKinnon et al, 2016                  | 2006-2012 | Individual | Yes | Participants from 48 low- and middle-income countries | Maternal health service coverage                  | Neonatal mortality, health inequality     | Positive     |
| 72 | Maynard, 2016                         | 1985-2005 | Ecological | Yes | 74 developing countries                               | Healthcare spending                               | Tuberculosis mortality                    | Positive     |
| 73 | Miething et al, 2013                  | 2000      | Individual | Yes | 19353 individuals from Sweden, East and West Germany  | Welfare regimes                                   | Self-rated health                         | Inconclusive |
| 74 | Minagawa, 2013                        | 1990-2009 | Ecological | Yes | 23 Eastern European countries                         | Healthcare spending                               | Age-specific mortality, self-rated health | Positive     |



1  
2  
3  
4  
5  
6  
7  
8  
9  
10  
11  
12  
13  
14  
15  
16  
17  
18  
19  
20  
21  
22  
23  
24  
25  
26  
27  
28  
29  
30  
31  
32  
33  
34  
35  
36  
37  
38  
39  
40  
41  
42  
43  
44  
45  
46  
47

|    |                           |           |                            |     |                                               |                                                              |                                                              |          |
|----|---------------------------|-----------|----------------------------|-----|-----------------------------------------------|--------------------------------------------------------------|--------------------------------------------------------------|----------|
| 75 | Moor et al, 2013          | 1981-1999 | Ecological                 | Yes | 47 European countries and regions             | Welfare state generosity (Social Policy Indicators Database) | Life satisfaction                                            | Positive |
| 76 | Muldoon et al, 2011       | 2001-2008 | Ecological                 | No  | 136 United Nations countries                  | Healthcare spending                                          | Infant, child and maternal mortality                         | Positive |
| 77 | Muntaner et al, 2017      | 2003-2010 | Household-level ecological | Yes | 27 European Union countries                   | Welfare regimes                                              | Self-rated health, chronic conditions                        | Positive |
| 78 | Nelson and Fritzell, 2014 | 1990-2009 | Ecological                 | Yes | 18 countries                                  | Minimum income benefits                                      | Mortality (life expectancy and age-standardised death rates) | Positive |
| 79 | Novignon et al, 2012      | 1995-2010 | Ecological                 | Yes | 44 Sub-Saharan African countries              | Healthcare spending                                          | Life expectancy, death rate, infant mortality                | Positive |
| 80 | Olafsdottir, 2007         | 1998      | Individual                 | Yes | Participants from USA and Iceland             | Welfare regimes, healthcare spending                         | Self-rated physical health, health inequality                | Positive |
| 81 | Olsen and Dahl, 2007      | 2003      | Individual                 | Yes | 38,472 individuals from 21 European countries | Healthcare spending                                          | Self-rated health                                            | Positive |
| 82 | Palència et al, 2014      | 2010      | Individual                 | Yes | 23782 men and 28655 women from                | Gender equality policies                                     | Health inequality                                            | Positive |

|    |                             |           |            |     |                                         |                                                           |                                      |              |
|----|-----------------------------|-----------|------------|-----|-----------------------------------------|-----------------------------------------------------------|--------------------------------------|--------------|
|    |                             |           |            |     | 26 European countries                   |                                                           |                                      |              |
| 83 | Pickett and Wilkinson, 2007 | 1998-2006 | Ecological | Yes | 23 rich countries                       | Income equality                                           | Child wellbeing                      | Positive     |
| 84 | Pinzón-Flórez et al, 2015   | 2000-2010 | Ecological | Yes | 154 countries                           | Healthcare spending                                       | Child and maternal mortality         | Positive     |
| 85 | Platts, 2015                | 2000-2007 | Ecological | Yes | UK and Russia                           | Welfare regimes                                           | Self-rated health                    | Inconclusive |
| 86 | Ploubidis et al, 2012       | 2006-2007 | Individual | Yes | 33528 people from 14 European countries | Welfare regimes, income equality                          | Health in later life                 | Positive     |
| 87 | Popham et al, 2013          | 2006      | Ecological | No  | 37 countries                            | Welfare regimes                                           | Life expectancy                      | Positive     |
| 88 | Reeves et al, 2014          | 1995-2012 | Ecological | Yes | 21 European countries                   | Healthcare spending, social spending, pension expenditure | Tuberculosis control                 | Positive     |
| 89 | Richter et al, 2012         | 2006      | Individual | Yes | 141091 adolescents from 32 countries    | Welfare regimes                                           | Subjective health, health inequality | Positive     |
| 90 | Rovny, 2011                 | 1990-1999 | Ecological | Yes | 17 OECD countries                       | Family social policy                                      | Fertility                            | Positive     |
| 91 | Sacker et al, 2011          | 1995-2001 | Ecological | Yes | Britain, Germany, Denmark and USA       | Welfare regimes                                           | Self-rated health                    | Positive     |
| 92 | Sarti et al, 2013           | 2005      | Individual | Yes | Participants from                       | Welfare regimes                                           | Self-rated health, health inequality | Positive     |

1  
2  
3  
4  
5  
6  
7  
8  
9  
10  
11  
12  
13  
14  
15  
16  
17  
18  
19  
20  
21  
22  
23  
24  
25  
26  
27  
28  
29  
30  
31  
32  
33  
34  
35  
36  
37  
38  
39  
40  
41  
42  
43  
44  
45  
46  
47

|    |                            |            |            |     |                                                |                                                                                                       |                                                       |              |
|----|----------------------------|------------|------------|-----|------------------------------------------------|-------------------------------------------------------------------------------------------------------|-------------------------------------------------------|--------------|
|    |                            |            |            |     | European countries                             |                                                                                                       |                                                       |              |
| 93 | Shim, 2015                 | 1980-2010  | Ecological | Yes | 19 OECD countries                              | Social welfare expenditure                                                                            | Infant mortality                                      | Inconclusive |
| 94 | Stavrova et al, 2011       | 1999-2009  | Individual | Yes | Participants from 28 OECD countries            | Unemployment benefit policies                                                                         | Wellbeing among the unemployed                        | Inconclusive |
| 95 | Stuckler et al, 2010       | 1980-2005  | Ecological | Yes | Up to 18 European Union countries              | Social welfare spending                                                                               | All-cause mortality, cause-specific mortality         | Positive     |
| 96 | Van der Heuvel et al, 2013 | 1950-2000  | Ecological | Yes | Sweden, Netherlands, Canada, USA, Cuba         | Welfare regimes, Redistributive welfare policy                                                        | Infant mortality, low birth weight, under 5 mortality | Positive     |
| 97 | Van der Wel et al, 2011    | 2005       | Ecological | Yes | 26 European countries                          | Income equality, spending on active labour market policies, benefit generosity, employment protection | Social inequality in sickness                         | Positive     |
| 98 | Van Tuyckom, 2011          | Up to 2008 | Individual | Yes | 24,846 people from 27 European Union countries | Healthcare spending                                                                                   | Physical activity                                     | Positive     |

|     |                            |      |            |     |                                                           |                                                                   |                                        |              |
|-----|----------------------------|------|------------|-----|-----------------------------------------------------------|-------------------------------------------------------------------|----------------------------------------|--------------|
| 99  | Vahid Shahidi et al, 2016  | 2012 | Individual | Yes | 22123 individuals from 23 countries with a welfare state  | Welfare social policy                                             | Self-rated health of the unemployed    | Positive     |
| 100 | Vöörmann and Helemäe, 2013 | 2010 | Individual | Yes | 5480 individuals from 4 Eastern European countries        | Welfare regimes                                                   | Self-rated health, health inequalities | Inconclusive |
| 101 | Wu and Chiang, 2007        | 2002 | Ecological | Yes | Taiwan and 21 comparison industrialized countries         | Income inequality, healthcare spending, public social expenditure | Child mortality, under-five mortality  | Positive     |
| 102 | York and Bell, 2014        | 2005 | Ecological | Yes | Countries from the World Bank database with relevant data | Healthcare spending, gender equality policies                     | Self-reported life satisfaction (0-10) | Positive     |

1  
2  
3  
4  
5  
6  
7  
8  
9  
10  
11  
12  
13  
14  
15  
16  
17  
18  
19  
20  
21  
22  
23  
24  
25  
26  
27  
28  
29  
30  
31  
32  
33  
34  
35  
36  
37  
38  
39  
40  
41  
42  
43  
44  
45  
46  
47

**Supplementary file 8. Table of study-level characteristics and results for political tradition**

| Serial number                       | Authors, publication year   | Years of study | Level of analysis | Assessment of economic factors | Setting                                                 | Political exposures                                      | Population health outcomes                               | Result category |
|-------------------------------------|-----------------------------|----------------|-------------------|--------------------------------|---------------------------------------------------------|----------------------------------------------------------|----------------------------------------------------------|-----------------|
| <b>Studies from the 2010 review</b> |                             |                |                   |                                |                                                         |                                                          |                                                          |                 |
| 1                                   | Borrell et al, 2009         | 2000           | Individual        | Yes                            | 196,280 persons from 13 European countries              | Political tradition classification                       | Self-rated health                                        | Positive        |
| 2                                   | Cereseto and Waitzkin, 1986 | 1983-1984      | Ecological        | Yes                            | 123 countries, grouped by level of economic development | Political-economic system                                | Physical quality of life index                           | Positive        |
| 3                                   | Chung and Muntaner, 2006    | 1960-1994      | Ecological        | Yes                            | 19 OECD countries                                       | Voter partisanship                                       | Low birth weight, infant mortality, under-five mortality | Positive        |
| 4                                   | Correa and Namkoong, 1992   | 1980           | Ecological        | Yes                            | 116 countries with a population over 1 million          | Political conditions; political tradition classification | Life expectancy, mortality                               | Positive        |

|    |                           |           |            |     |                                                |                                                                             |                                                                                             |          |
|----|---------------------------|-----------|------------|-----|------------------------------------------------|-----------------------------------------------------------------------------|---------------------------------------------------------------------------------------------|----------|
| 5  | Espelt et al, 2008        | 2004      | Individual | Yes | 16,901 persons in 9 European countries         | Political tradition classification                                          | Self-reported health, long-term illness                                                     | Positive |
| 6  | Lena and London, 1993     | 1983      | Ecological | Yes | Up to 84 peripheral and non-core nations       | Political tradition classification                                          | Infant mortality, child mortality, life expectancy                                          | Positive |
| 7  | London and Williams, 1990 | 1965-1970 | Ecological | Yes | Up to 110 periphery and semi-periphery nations | Political tradition classification                                          | Infant mortality, life expectancy                                                           | Positive |
| 8  | Moon and Dixon, 1985      | 1970-1975 | Ecological | Yes | 116 nations                                    | Political ideology (left, right, centre)                                    | Physical Quality of Life Index: life expectancy, infant mortality                           | Positive |
| 9  | Muntaner et al, 2002      | 1989-1992 | Ecological | Yes | 16 wealthy countries                           | Working class power, voter partisanship, time in power by different parties | Life expectancy, self-rated health, low birth weight, and age- and cause-specific mortality | Positive |
| 10 | Navarro et al, 2003       | 1950-1998 | Ecological | Yes | 17 OECD countries                              | Working class power, voter partisanship                                     | Infant mortality, life expectancy, health inequalities                                      | Positive |
| 11 | Navarro and Shi, 2001     | 1960-1996 | Ecological | Yes | 18 OECD countries                              | Political tradition classification,                                         | Infant mortality,                                                                           | Positive |

1  
2  
3  
4  
5  
6  
7  
8  
9  
10  
11  
12  
13  
14  
15  
16  
17  
18  
19  
20  
21  
22  
23  
24  
25  
26  
27  
28  
29  
30  
31  
32  
33  
34  
35  
36  
37  
38  
39  
40  
41  
42  
43  
44  
45  
46  
47

|                                |                            |           |            |     |                                  |                                                                                      |                                                   |              |
|--------------------------------|----------------------------|-----------|------------|-----|----------------------------------|--------------------------------------------------------------------------------------|---------------------------------------------------|--------------|
|                                |                            |           |            |     |                                  | working class power                                                                  | health inequalities                               |              |
| 12                             | Navarro et al, 2006        | 1972-1996 | Ecological | Yes | 17 OECD countries                | Voter partisanship, time in power by different parties                               | Infant mortality, life expectancy                 | Positive     |
| <b>Studies from our update</b> |                            |           |            |     |                                  |                                                                                      |                                                   |              |
| 13                             | Bosdriesz et al, 2015      | 1996-2010 | Ecological | Yes | 11 European Union countries      | Percentage of seats held by social democratic, socialist and other left-wing parties | Tobacco Control Scale                             | Positive     |
| 14                             | Granados, 2010             | 1950-2000 | Ecological | Yes | 8 European countries             | Political tradition classification                                                   | Life expectancy, mortality, tobacco consumption   | Inconclusive |
| 15                             | Huijts et al, 2010         | 2002-2006 | Individual | Yes | 29 European countries and Israel | Political tradition classification                                                   | Self-rated health                                 | Positive     |
| 16                             | Lin et al, 2012            | 1970-2004 | Ecological | Yes | 119 less developed countries     | Political regime score from Polity IV                                                | Life expectancy                                   | Positive     |
| 17                             | Mackenbach and McKee, 2013 | 1990-2009 | Ecological | Yes | 43 European countries            | Left-wing participation in government (share of seats)                               | Success in implementing effective health policies | Inconclusive |

Supplementary file 9. Table of study-level characteristics and results for democracy

| Serial number                   | Authors, publication year  | Years of study | Level of analysis | Setting                                        | Assessment of economic factors | Political exposures                               | Population health outcomes                                                      | Result category |
|---------------------------------|----------------------------|----------------|-------------------|------------------------------------------------|--------------------------------|---------------------------------------------------|---------------------------------------------------------------------------------|-----------------|
| <b>Studies from 2010 review</b> |                            |                |                   |                                                |                                |                                                   |                                                                                 |                 |
| 1                               | Adeyi, 1997                | 1989-1993      | Ecological        | 10 former Communist countries                  | No                             | Transition from Communism to capitalist democracy | Life expectancy, infant mortality, probability of dying between 15 and 65 years | Negative        |
| 2                               | Alvarez-Dardet, 2006       | 2000           | Ecological        | 23 former Communist countries                  | Yes                            | Democratic deficit                                | Life expectancy, infant mortality, maternal mortality                           | Positive        |
| 3                               | Baum and Lake, 2003        | 1967-1997      | Ecological        | 128 poor and non-poor countries                | Yes                            | Democracy (Polity III)                            | Female life expectancy                                                          | Positive        |
| 4                               | Besley and Kudamatsu, 2006 | 1962-2002      | Ecological        | Up to 160 countries transitioning to democracy | Yes                            | Democracy (Polity IV)                             | Life expectancy, infant mortality                                               | Positive        |



|    |                            |           |            |                                                           |     |                                                        |                                                                 |              |
|----|----------------------------|-----------|------------|-----------------------------------------------------------|-----|--------------------------------------------------------|-----------------------------------------------------------------|--------------|
| 5  | Franco, 2004               | 1998      | Ecological | 170 high, medium and low-income countries                 | Yes | Democracy (Freedom House)                              | Life expectancy, infant mortality, maternal mortality           | Positive     |
| 6  | Frey and Al-Roumi, 1999    | 1970-1990 | Ecological | 87 developed and less-developed countries                 | No  | Democracy (political rights index and civil liberties) | Infant mortality, life expectancy                               | Positive     |
| 7  | Gauri and Khaleghian, 2002 | 1989-1997 | Ecological | 208 low and middle-income countries                       | Yes | Democracy (Polity IV)                                  | Vaccine coverage for diphtheria, tetanus, pertussis and measles | Negative     |
| 8  | Ghobareh et al, 2004       | 2000      | Ecological | 179 countries in WHO                                      | Yes | Democracy (Polity IV, Freedom House)                   | Health-adjusted life expectancy                                 | Positive     |
| 9  | Gizeles, 2009              | 1982-2000 | Ecological | 117 developed and developing countries                    | Yes | Democracy (Polity IV), state capacity                  | AIDS infection rate                                             | Positive     |
| 10 | Houweling et al, 2005      | 1999      | Ecological | 43 developing countries in Asia, Africa and Latin America | Yes | Democracy (political rights index)                     | Under five mortality rate                                       | Inconclusive |
| 11 | Kick et al, 1990           | 1970-1985 | Ecological | 63 developing countries                                   | Yes | Political democracy (political rights index)           | Infant mortality                                                | Positive     |

|    |                           |           |            |                                                      |     |                                                                                               |                                                                   |              |
|----|---------------------------|-----------|------------|------------------------------------------------------|-----|-----------------------------------------------------------------------------------------------|-------------------------------------------------------------------|--------------|
| 12 | Klomp and de Haan, 2009   | 2000-2005 | Ecological | 171 countries with a population greater than 200,000 | Yes | Decree of democracy, political stability                                                      | 19 national health indicators                                     | Positive     |
| 13 | Lake and Baum, 2001       | 1970-1992 | Ecological | Up to 110 developed countries                        | No  | Democracy (Polity III)                                                                        | Life expectancy, infant mortality                                 | Positive     |
| 14 | Lena and London; 1993     | 1983      | Ecological | Up to 84 peripheral and non-core nations             | Yes | Level of democracy                                                                            | Infant mortality, child mortality, life expectancy                | Positive     |
| 15 | London and Williams; 1990 | 1965-1970 | Ecological | Up to 110 periphery and semi-periphery nations       | Yes | Level of political democracy                                                                  | Infant mortality, life expectancy                                 | Positive     |
| 16 | Moon and Dixon, 1985      | 1970-1975 | Ecological | 116 nations                                          | Yes | Level of political democracy, political stability                                             | Physical Quality of Life Index: life expectancy, infant mortality | Positive     |
| 17 | Navia and Zweifel, 2003   | 1990-1997 | Ecological | 188 democratic or dictatorial countries              | Yes | Democracy (yes or no, based on presence of elections)                                         | Fertility, child survival                                         | Positive     |
| 18 | Pillai and Gupta, 2006    | 2001      | Ecological | 129 developing countries                             | No  | Democracy (human rights rating, political rights, and civil liberty, political terror scales) | 10 global monitoring indicators of women's reproductive health    | Positive     |
| 19 | Ross, 2006                | 1970-2000 | Ecological | 168 countries with a population                      | Yes | Democracy (Polity IV), years of                                                               | Child mortality, infant mortality                                 | Inconclusive |

|    |                         |           |            |                                                     |     |                                                    |                                                                               |              |
|----|-------------------------|-----------|------------|-----------------------------------------------------|-----|----------------------------------------------------|-------------------------------------------------------------------------------|--------------|
|    |                         |           |            | greater than 200,000                                |     | democracy since 1900                               |                                                                               |              |
| 20 | Rudra and Haggard, 2005 | 1975-1997 | Ecological | 57 less developed countries                         | Yes | Democracy (Polity IV)                              | Infant mortality                                                              | Positive     |
| 21 | Safaei, 2006            | 2003      | Ecological | 118 autocratic, incoherent and democratic countries | Yes | Democracy (Polity IV)                              | Life expectancy, mortality rate, child mortality rate                         | Positive     |
| 22 | Shandra et al, 2004     | 1980-1997 | Ecological | 59 developing countries                             | Yes | Level of political democracy                       | Infant mortality                                                              | Positive     |
| 23 | Shandra et al, 2010     | 1990-2005 | Ecological | 74 low income countries                             | Yes | Democracy (Polity IV)                              | Infant mortality                                                              | Positive     |
| 24 | Stroup, 2007            | 1980-2000 | Ecological | Up to 105 countries                                 | Yes | Political Rights Index (Freedom House)             | Life expectancy, child mortality                                              | Positive     |
| 25 | Tsai, 2006              | 1975-1998 | Ecological | 119 developing countries                            | Yes | Democracy (majority rule and political contention) | Life expectancy, infant mortality under one year, infant mortality under five | Inconclusive |
| 26 | Wejnert, 2008           | 1970-2005 | Ecological | 58 core and peripheral countries                    | Yes | Democracy (Polity IV)                              | Maternal care, fertility rate, maternal mortality, women life expectancy      | Inconclusive |
| 27 | Zweifel and Navia, 2000 | 1950-1990 | Ecological | 138 democratic or                                   | Yes | Democracy (yes or no, defined)                     | Infant mortality                                                              | Positive     |

|                                |                             |               |            | dictatorial countries                           |     | by presence of elections)                    |                                        |              |
|--------------------------------|-----------------------------|---------------|------------|-------------------------------------------------|-----|----------------------------------------------|----------------------------------------|--------------|
| <b>Studies from our update</b> |                             |               |            |                                                 |     |                                              |                                        |              |
| 28                             | Batniji et al, 2014         | 1980-2011     | Ecological | 22 Arab countries                               | Yes | Extent of democracy                          | Mortality                              | Inconclusive |
| 29                             | Burroway, 2016              | 1995-2008     | Individual | 52 developing countries                         | Yes | Democracy (Polity IV)                        | Child diarrhoea and malnutrition       | Inconclusive |
| 30                             | Chuang et al, 2013          | 1980-2009     | Ecological | 46 less-developed countries                     | Yes | Democracy (Polity IV)                        | Infant mortality                       | Positive     |
| 31                             | Chuang et al, 2013          | 1980-2009     | Ecological | 46 less-developed countries                     | Yes | Democracy (Polity IV)                        | Under-5 mortality                      | Inconclusive |
| 32                             | Dietrich and Bernhard, 2015 | 1980s to 2012 | Ecological | 88 countries that were not OECD members in 1984 | Yes | Democracy (Polity IV)                        | Infant mortality, basic nutrition      | Inconclusive |
| 33                             | Doherty and Kelly, 2010     | Not stated    | Individual | 30,816 individuals from 17 European countries   | Yes | Satisfaction with democracy on 0-10 scale    | Self-reported happiness on 0-10 scales | Positive     |
| 34                             | Fumagalli et al, 2013       | 1990-2007     | Ecological | 47 developing countries                         | Yes | Democracy (Polity IV), political competition | BMI                                    | Positive     |
| 35                             | Hauck et al, 2012           | 1990-2012     | Ecological | 54 low-income studies                           | Yes | Democracy (Polity IV)                        | Life expectancy                        | Positive     |
| 36                             | Klenk et al, 2016           | 1950-2010     | Ecological | 64 countries from WHO                           | Yes | Democratization                              | Mortality                              | Positive     |

1  
2  
3  
4  
5  
6  
7  
8  
9  
10  
11  
12  
13  
14  
15  
16  
17  
18  
19  
20  
21  
22  
23  
24  
25  
26  
27  
28  
29  
30  
31  
32  
33  
34  
35  
36  
37  
38  
39  
40  
41  
42  
43  
44  
45  
46  
47

|    |                            |                                  |                     |                                        |     |                                                                   |                                                   |          |
|----|----------------------------|----------------------------------|---------------------|----------------------------------------|-----|-------------------------------------------------------------------|---------------------------------------------------|----------|
|    |                            |                                  |                     | mortality database                     |     |                                                                   |                                                   |          |
| 37 | Krueger et al, 2015        | 2002-2004                        | Individual          | 313,554 individuals from 67 countries  | Yes | Democracy variable resulting from factor analysis of 7 indicators | Self-rated health                                 | Positive |
| 38 | Kudamatsu, 2012            | Up to 2004                       | Ecological          | Sub-Saharan African countries          | Yes | Democratization                                                   | Infant mortality                                  | Positive |
| 39 | Mackenbach, 2013           | 1900-2008                        | Ecological          | European countries                     | No  | Democracy (binary)                                                | Life expectancy                                   | Positive |
| 40 | Mackenbach et al, 2013     | 1960-2008                        | Ecological          | European countries                     | Yes | Democratization                                                   | Life expectancy                                   | Positive |
| 41 | Mackenbach and McKee, 2013 | 1990-2009                        | Ecological          | 43 European countries                  | Yes | Democracy (+10 to -10)                                            | Success in implementing effective health policies | Positive |
| 42 | Maynard, 2016              | 1985-2005                        | Ecological analysis | 74 developing countries                | Yes | Democracy (Freedom House)                                         | Tuberculosis mortality                            | Positive |
| 43 | Minagawa, 2013             | 1990-2009                        | Ecological analysis | 23 Eastern European countries          | Yes | Freedom (Freedom House, Heritage Foundation)                      | Age-specific mortality, self-rated health         | Positive |
| 44 | Witvliet et al, 2013       | From 2000, end date not reported | Individual          | 72524 adults from 20 African countries | Yes | Transparency and freedom from corruption                          | Self-rated health                                 | Positive |

Supplementary file 10. Table of study-level characteristics and results for globalisation

| Serial number | Authors, publication year | Years of study | Level of analysis | Setting                                          | Political exposures                                                                                      | Population health outcomes | Result category |
|---------------|---------------------------|----------------|-------------------|--------------------------------------------------|----------------------------------------------------------------------------------------------------------|----------------------------|-----------------|
| 1             | Moore et al, 2006         | 2000           | Ecological        | 128 countries divided into 6 world-system blocks | National trade, world-system role                                                                        | Infant mortality           | Positive        |
| 2             | Shandra et al, 2004       | 1980-1997      | Ecological        | 59 developing countries                          | Commodity concentration, multinational corporate penetration, international monetary fund conditionality | Infant mortality           | Negative        |
| 3             | Shen and Williamson, 2001 | 1965-1991      | Ecological        | 82 less developed countries                      | Foreign trade, foreign investment, debt increase                                                         | Infant mortality           | Negative        |
| 4             | Shen and Williamson, 1997 | 1960-1991      | Ecological        | 86 less developed countries                      | Foreign investment, debt dependency                                                                      | Child survival probability | Negative        |

1  
2  
3  
4  
5  
6  
7  
8  
9  
10  
11  
12  
13  
14  
15  
16  
17  
18  
19  
20  
21  
22  
23  
24  
25  
26  
27  
28  
29  
30  
31  
32  
33  
34  
35  
36  
37  
38  
39  
40  
41  
42  
43  
44  
45  
46

| Studies from our update |                                |            |            |                                             |                                                                                                                                       |                                    |              |
|-------------------------|--------------------------------|------------|------------|---------------------------------------------|---------------------------------------------------------------------------------------------------------------------------------------|------------------------------------|--------------|
| 5                       | Bergh and Nilsson, 2010        | 1970-2005  | Ecological | 92 high-, middle- and low-income countries  | KOF index                                                                                                                             | Life expectancy                    | Positive     |
| 6                       | Bozorgmehr and Sebastian, 2014 | 1990-2010  | Ecological | 22 high-burden tuberculosis countries       | World Trade Organization membership status and duration, trade as a percentage of GDP, Economic Freedom of the World Index, KOF Index | Tuberculosis incidence             | Inconclusive |
| 7                       | Chuang et al, 2013             | 1980-2009  | Ecological | 46 less-developed countries                 | Debt, foreign investment                                                                                                              | Infant mortality                   | Inconclusive |
| 8                       | Chuang et al, 2013             | 1980-2009  | Ecological | 46 less-developed countries                 | Debt, foreign investment                                                                                                              | Under-5 mortality                  | Inconclusive |
| 9                       | Costa Font and Mas, 2016       | 1989-2005  | Ecological | 26 countries                                | KOF Index, CSGR Index                                                                                                                 | Obesity prevalence, caloric intake | Negative     |
| 10                      | Cross et al, 2009              | Not stated | Individual | UK, Spain, Kenya and Uganda                 | Localised or globalised food supply system                                                                                            | Health-related quality of life     | Positive     |
| 11                      | De Vogli et al, 2014           | 1980-2008  | Ecological | 127 low-, middle- and high-income countries | KOF Index                                                                                                                             | BMI                                | Negative     |

|    |                            |            |                            |                                   |                                                                                                                                       |                                                                                                                                                                                                                    |          |
|----|----------------------------|------------|----------------------------|-----------------------------------|---------------------------------------------------------------------------------------------------------------------------------------|--------------------------------------------------------------------------------------------------------------------------------------------------------------------------------------------------------------------|----------|
| 12 | Estimé et al, 2014         | 2005-2010  | Household-level ecological | Pacific nations                   | Food imports                                                                                                                          | Obesity                                                                                                                                                                                                            | Negative |
| 13 | Fan and Faioso Le'au, 2015 | Up to 2014 | Ecological                 | Independent and American Samoa    | Westernisation                                                                                                                        | Life expectancy, neonatal and child mortality, measles immunisation, diabetes mortality, cancer mortality, cerebrovascular disease mortality, heart disease mortality, pneumonia mortality, overweight and obesity | Negative |
| 14 | Gerring and Thacker, 2008  | 1960-1999  | Ecological                 | All countries with available data | Open international trade policies, low-inflation macroeconomic environments, market-oriented property rights, GATT and WTO membership | Infant mortality                                                                                                                                                                                                   | Positive |
| 15 | Goryakin et al, 2015       | 1991-2009  | Individual                 | Up to 887,00 women in 56          | KOF Index                                                                                                                             | Overweight and obesity                                                                                                                                                                                             | Negative |



1  
2  
3  
4  
5  
6  
7  
8  
9  
10  
11  
12  
13  
14  
15  
16  
17  
18  
19  
20  
21  
22  
23  
24  
25  
26  
27  
28  
29  
30  
31  
32  
33  
34  
35  
36  
37  
38  
39  
40  
41  
42  
43  
44  
45  
46

|    |                          |            |            |                                           |                                                                           |                                                                                |              |
|----|--------------------------|------------|------------|-------------------------------------------|---------------------------------------------------------------------------|--------------------------------------------------------------------------------|--------------|
|    |                          |            |            | low- and middle-income countries          |                                                                           |                                                                                |              |
| 16 | Hauck et al, 2012        | 1990-2012  | Ecological | 54 low-income studies                     | Terms of international trade, foreign investment, debt service and relief | Life expectancy                                                                | Inconclusive |
| 17 | Jolly et al, 2013        | 2002       | Ecological | 27 Latin American and Caribbean countries | Net food import                                                           | Obesity                                                                        | Negative     |
| 18 | Jorgenson, 2009          | 1980-2000  | Ecological | Less-developed countries                  | Foreign direct investment                                                 | Water pollution                                                                | Negative     |
| 19 | Jorgenson, 2009          | 1980-2000  | Ecological | Less-developed countries                  | Foreign direct investment, export intensity                               | Water pollution                                                                | Negative     |
| 20 | Levine and Rothman, 2006 | Up to 1990 | Ecological | Up to 130 countries                       | Economic openness                                                         | Infant mortality, under-5 mortality, anthropometric measures of child stunting | Inconclusive |
| 21 | Martens et al, 2010      | Up to 2008 | Ecological | Global, subject to data availability      | Maastricht Globalization Index                                            | Infant mortality, under-5 mortality, adult mortality                           | Positive     |
| 22 | Maynard, 2015            | 2000-2010  | Ecological | Up to 85 low- and middle-                 | IGTA membership and status,                                               | Youth smoking rates (Global Youth Tobacco Survey)                              | Negative     |

|    |                               |            |            |                                  |                                               |                                                    |              |
|----|-------------------------------|------------|------------|----------------------------------|-----------------------------------------------|----------------------------------------------------|--------------|
|    |                               |            |            | income countries                 | trade, imports, exports                       |                                                    |              |
| 23 | Maynard, 2016                 | 1985-2005  | Ecological | 74 developing countries          | Debt, trade dependency                        | Tuberculosis mortality                             | Inconclusive |
| 24 | Milner et al, 2011            | 1980-2006  | Ecological | 35 countries                     | A globalisation index developed for the study | Suicide rate                                       | Negative     |
| 25 | Mukherjee and Kriekhaus, 2011 | 1970-2007  | Ecological | 132 countries                    | Economic, political and social globalisation  | Infant mortality, life expectancy, child mortality | Positive     |
| 26 | Oberlander et al, 2017        | 1970-2011  | Ecological | 70 countries                     | Social globalisation, trade openness          | Nutritional health                                 | Inconclusive |
| 27 | Oster, 2010                   | Up to 2007 | Ecological | UN countries with available data | Export activity                               | HIV                                                | Negative     |
| 28 | Owen and Wu, 2007             | 1960-1995  | Ecological | 219 countries                    | Openness to trade                             | Life expectancy, infant mortality                  | Positive     |

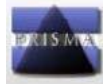

# PRISMA 2009 Checklist

| Section/topic                      | #  | Checklist item                                                                                                                                                                                                                                                                                              | Reported on page #       |
|------------------------------------|----|-------------------------------------------------------------------------------------------------------------------------------------------------------------------------------------------------------------------------------------------------------------------------------------------------------------|--------------------------|
| <b>TITLE</b>                       |    |                                                                                                                                                                                                                                                                                                             |                          |
| Title                              | 1  | Identify the report as a systematic review, meta-analysis, or both.                                                                                                                                                                                                                                         | 1                        |
| <b>ABSTRACT</b>                    |    |                                                                                                                                                                                                                                                                                                             |                          |
| Structured summary                 | 2  | Provide a structured summary including, as applicable: background; objectives; data sources; study eligibility criteria, participants, and interventions; study appraisal and synthesis methods; results; limitations; conclusions and implications of key findings; systematic review registration number. | 2                        |
| <b>INTRODUCTION</b>                |    |                                                                                                                                                                                                                                                                                                             |                          |
| Rationale                          | 3  | Describe the rationale for the review in the context of what is already known.                                                                                                                                                                                                                              | 4-5                      |
| Objectives                         | 4  | Provide an explicit statement of questions being addressed with reference to participants, interventions, comparisons, outcomes, and study design (PICOS).                                                                                                                                                  | 5                        |
| <b>METHODS</b>                     |    |                                                                                                                                                                                                                                                                                                             |                          |
| Protocol and registration          | 5  | Indicate if a review protocol exists, if and where it can be accessed (e.g., Web address), and, if available, provide registration information including registration number.                                                                                                                               | NA                       |
| Eligibility criteria               | 6  | Specify study characteristics (e.g., PICOS, length of follow-up) and report characteristics (e.g., years considered, language, publication status) used as criteria for eligibility, giving rationale.                                                                                                      | 6                        |
| Information sources                | 7  | Describe all information sources (e.g., databases with dates of coverage, contact with study authors to identify additional studies) in the search and date last searched.                                                                                                                                  | 6                        |
| Search                             | 8  | Present full electronic search strategy for at least one database, including any limits used, such that it could be repeated.                                                                                                                                                                               | Table 1                  |
| Study selection                    | 9  | State the process for selecting studies (i.e., screening, eligibility, included in systematic review, and, if applicable, included in the meta-analysis).                                                                                                                                                   | 5-7                      |
| Data collection process            | 10 | Describe method of data extraction from reports (e.g., piloted forms, independently, in duplicate) and any processes for obtaining and confirming data from investigators.                                                                                                                                  | 7                        |
| Data items                         | 11 | List and define all variables for which data were sought (e.g., PICOS, funding sources) and any assumptions and simplifications made.                                                                                                                                                                       | 7                        |
| Risk of bias in individual studies | 12 | Describe methods used for assessing risk of bias of individual studies (including specification of whether this was done at the study or outcome level), and how this information is to be used in any data synthesis.                                                                                      | 7                        |
| Summary measures                   | 13 | State the principal summary measures (e.g., risk ratio, difference in means).                                                                                                                                                                                                                               | 7, but not meta-analysis |



# PRISMA 2009 Checklist

|                      |    |                                                                                                                                                           |                         |
|----------------------|----|-----------------------------------------------------------------------------------------------------------------------------------------------------------|-------------------------|
| Synthesis of results | 14 | Describe the methods of handling data and combining results of studies, if done, including measures of consistency (e.g., $I^2$ ) for each meta-analysis. | 7, but no meta-analysis |
|----------------------|----|-----------------------------------------------------------------------------------------------------------------------------------------------------------|-------------------------|

Page 1 of 2

| Section/topic                 | #  | Checklist item                                                                                                                                                                                           | Reported on page #                  |
|-------------------------------|----|----------------------------------------------------------------------------------------------------------------------------------------------------------------------------------------------------------|-------------------------------------|
| Risk of bias across studies   | 15 | Specify any assessment of risk of bias that may affect the cumulative evidence (e.g., publication bias, selective reporting within studies).                                                             | NA, no meta-analysis                |
| Additional analyses           | 16 | Describe methods of additional analyses (e.g., sensitivity or subgroup analyses, meta-regression), if done, indicating which were pre-specified.                                                         | NA, no meta-analysis                |
| <b>RESULTS</b>                |    |                                                                                                                                                                                                          |                                     |
| Study selection               | 17 | Give numbers of studies screened, assessed for eligibility, and included in the review, with reasons for exclusions at each stage, ideally with a flow diagram.                                          | 7-8, Figure 2, Supplementary file 1 |
| Study characteristics         | 18 | For each study, present characteristics for which data were extracted (e.g., study size, PICOS, follow-up period) and provide the citations.                                                             | Tables 2-5                          |
| Risk of bias within studies   | 19 | Present data on risk of bias of each study and, if available, any outcome level assessment (see item 12).                                                                                                | 8, Supplementary file 3             |
| Results of individual studies | 20 | For all outcomes considered (benefits or harms), present, for each study: (a) simple summary data for each intervention group (b) effect estimates and confidence intervals, ideally with a forest plot. | Tables 2-5, no meta-analysis        |
| Synthesis of results          | 21 | Present results of each meta-analysis done, including confidence intervals and measures of consistency.                                                                                                  | NA, no meta-analysis                |
| Risk of bias across studies   | 22 | Present results of any assessment of risk of bias across studies (see Item 15).                                                                                                                          | NA, no meta-analysis                |
| Additional analysis           | 23 | Give results of additional analyses, if done (e.g., sensitivity or subgroup analyses, meta-regression [see Item 16]).                                                                                    | NA, no meta-analysis                |
| <b>DISCUSSION</b>             |    |                                                                                                                                                                                                          |                                     |
| Summary of evidence           | 24 | Summarize the main findings including the strength of evidence for each main outcome; consider their relevance to key groups (e.g., healthcare providers, users, and policy makers).                     | 10                                  |
| Limitations                   | 25 | Discuss limitations at study and outcome level (e.g., risk of bias), and at review-level (e.g., incomplete retrieval of identified research, reporting bias).                                            | 11-12                               |

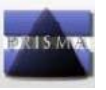

# PRISMA 2009 Checklist

1  
2  
3  
4  
5  
6  
7  
8  
9  
10  
11  
12  
13  
14  
15  
16  
17  
18  
19  
20  
21  
22  
23  
24  
25  
26  
27  
28  
29  
30  
31  
32  
33  
34  
35  
36  
37  
38  
39  
40  
41  
42  
43  
44  
45  
46  
47

|                |    |                                                                                                                                            |       |
|----------------|----|--------------------------------------------------------------------------------------------------------------------------------------------|-------|
| Conclusions    | 26 | Provide a general interpretation of the results in the context of other evidence, and implications for future research.                    | 13-15 |
| <b>FUNDING</b> |    |                                                                                                                                            |       |
| Funding        | 27 | Describe sources of funding for the systematic review and other support (e.g., supply of data); role of funders for the systematic review. | 15    |

From: Moher D, Liberati A, Tetzlaff J, Altman DG, The PRISMA Group (2009). Preferred Reporting Items for Systematic Reviews and Meta-Analyses: The PRISMA Statement. PLoS Med 6(7): e1000097. doi:10.1371/journal.pmed1000097

For more information, visit: [www.prisma-statement.org](http://www.prisma-statement.org).

For peer review only
