# Supplementary material for: How much evidence is there that political factors are related to population health outcomes? An internationally comparative systematic review
Source: PubMed Central journal article supplement — BMJ Open. 2018 Oct 18;8(10):e020886. doi: 10.1136/bmjopen-2017-020886 (PMC6196855; doi:10.1136/bmjopen-2017-020886), 2018-10-18
Supplement: bmjopen-2017-020886supp001.pdf [file bmjopen-2017-020886supp001.pdf]

**Supplementary file 1. Devolution and health systems: examples of the differences in health provision between Scotland and England**

| <b>Scotland</b>                                                                                                      | <b>England</b>                              |
|----------------------------------------------------------------------------------------------------------------------|---------------------------------------------|
| <b>Free dental checks at 6-monthly intervals (although there is a charge for treatment)</b>                          | <b>Dental check costs £20.60</b>            |
| <b>Free NHS prescriptions</b>                                                                                        | <b>Prescription costs £8.60</b>             |
| <b>Free NHS eye tests</b>                                                                                            | <b>Commercial eye tests</b>                 |
| <b>Free personal and nursing care upon assessed need</b>                                                             | <b>Commercial care</b>                      |
| <b>Public health is NHS-run</b>                                                                                      | <b>Public health is local authority-run</b> |
| <b>Offers a free baby box scheme, supplying parents of newborn children with around 40 different essential items</b> | <b>No baby box scheme</b>                   |
| <b>Minimum alcohol unit pricing (implementation date 1 May 2018)</b>                                                 | <b>No minimum alcohol unit pricing</b>      |

All information correct at time of writing. Certain services that are chargeable in England are offered free of charge to those on certain state benefits, but are not universally free.

Table adapted from a slide from the following conference presentation by the lead author of this manuscript Dr Max Barnish: "Barnish M. Health policy and the politics of being an early career researcher. Invited oral presentation, Early Career Researchers Workshop, Society for Social Medicine Annual Scientific Meeting, Manchester, UK, 2017". The copyright to this slide is held by Dr Barnish.
