# Supplementary material for: How much evidence is there that political factors are related to population health outcomes? An internationally comparative systematic review
Source: PubMed Central journal article supplement — BMJ Open. 2018 Oct 18;8(10):e020886. doi: 10.1136/bmjopen-2017-020886 (PMC6196855; doi:10.1136/bmjopen-2017-020886), 2018-10-18
Supplement: bmjopen-2017-020886supp002.pdf [file bmjopen-2017-020886supp002.pdf]

## Supplementary file 2. Full MEDLINE search strategy

Platform: OVID

Version: Ovid MEDLINE(R) In-Process & Other Non-Indexed Citations and Ovid MEDLINE(R) 1946 to Present

Notes:

1. .mp indicates a keyword
2. In capitals followed by / indicates a MeSH term
3. exp indicates a MeSH term is exploded to encompass all subcategories, this was done by default

Search string:

(democracy.mp OR democratic.mp OR exp DEMOCRACY/ OR autocracy.mp OR autocratic.mp OR "welfare regime".mp OR exp SOCIAL WELFARE/ OR "welfare state".mp OR "welfare capitalism".mp OR politics.mp OR political.mp OR exp POLITICS/ OR "political tradition".mp OR globalisation.mp OR globalization.mp OR internationality.mp OR exp INTERNATIONALITY/)

AND

(health.mp OR exp HEALTH/ OR "health services".mp OR exp HEALTH SERVICES/ OR "population health".mp OR exp POPULATION HEALTH/ OR "public health".mp OR exp PUBLIC HEALTH/ OR "health economic".mp OR "health economics.mp" OR "health expenditure".mp OR "health expenditures.mp" OR exp HEALTH EXPENDITURES/ )

Limits: English language
