# Supplementary material for: How much evidence is there that political factors are related to population health outcomes? An internationally comparative systematic review
Source: PubMed Central journal article supplement — BMJ Open. 2018 Oct 18;8(10):e020886. doi: 10.1136/bmjopen-2017-020886 (PMC6196855; doi:10.1136/bmjopen-2017-020886), 2018-10-18
Supplement: bmjopen-2017-020886supp003.pdf [file bmjopen-2017-020886supp003.pdf]

### Supplementary file 3. List of all publications included in the review

1. Ades F, Senterre C, de Azambuja E, et al. Discrepancies in cancer incidence and mortality and its relationship to health expenditure in the 27 European Union member states. *Ann Oncol* 2013; 24: 2897-902.
2. Adeyi O, Chellaraj G, Goldstein E, et al. Health status during the transition in Central and Eastern Europe: Development in reverse? *Health Policy Plan* 1997; 12: 132-45.
3. Akinci F, Hamidi S, Suvankulov F, et al. Examining the impact of health care expenditures on health outcomes in the Middle East and N. Africa. *J Health Care Finance* 2014; 41(1): 1-23.
4. Alvarez-Dardet C, Franco-Giraldo A. Democratisation and health after the fall of the Wall. *J Epidemiol Community Health* 2006; 60: 669-71.
5. Avendano M, Juerges H, Mackenbach JP. Educational level and changes in health across Europe: longitudinal results from SHARE. *J Eur Soc Policy* 2009; 19: 301-16.
6. Bambra C, Lunau T, van der Wel KA, et al. Work, health, and welfare: the association between working conditions, welfare states, and self-reported general health in Europe. *Int J Health Serv* 2014; 44: 113-36.
7. Bambra C, Pope D, Swami V, et al. Gender, health inequalities and welfare state regimes: a cross-national study of 13 European countries. *J Epidemiol Community Health* 2009; 63: 38-44.
8. Bambra C, Eikemo TA. Welfare state regimes, unemployment and health: a comparative study of the relationship between unemployment and self-reported health in 23 European countries. *J Epidemiol Community Health* 2009; 63: 92-8.
9. Bambra C. Health status and the worlds of welfare. *Soc Policy Soc* 2006; 5: 53-62.
10. Bambra C. Cash versus services: 'worlds of welfare' and the decommodification of cash benefits and health care services. *J Soc Policy* 2005; 34: 195-213.
11. Batniji R, Khatib L, Cammett M, et al. Governance and health in the Arab world. *Lancet* 2014; 383: 343-55.
12. Baum MA, Lake DA. The political economy of growth: democracy and human capital, *Am J Pol Sci* 2003; 47: 333-47.
13. Bentley RJ, Pevalin D, Baker E, et al. Housing affordability, tenure and mental health in Australia and the United Kingdom: a comparative panel analysis. *Housing Studies* 2016; 31: 208-22.
14. Bergh A, Nilsson T. Good for living? On the relationship between globalization and life expectancy. *World Dev* 2010; 38: 1191-1203.
15. Besley T, Kudamatsu M. Health and democracy. *Am Econ Rev* 2006; 96: 313-18.
16. Bosdriez JR, Willemsen MC, Stronks K, et al. Tobacco control policy development in the European Union: do political factors matter? *Eur J Public Health* 2015; 25: 190-4.
17. Borrell C, Espelt A, Rodriguez-Sanz M, et al. Analysing differences in the magnitude of socioeconomic inequalities in self-perceived health by countries of different political tradition in Europe. *Int J Health Serv* 2009; 39: 321-41.
18. Bozorgmehr K, Sebastian M. 2014. Trade liberalization and tuberculosis incidence: a longitudinal multi-level analysis in 22 high burden countries between 1990 and 2010. *Health Policy Plan* 2014; 29: 328-51.
19. Bradley EH, Elkins BR, Herrin J, et al. Health and social services expenditures: associations with health outcomes. *BMJ Qual Saf* 2011; 20:826-831.
20. Brandt M, Hank K. Scars that will not disappear: long-term associations between early and later life unemployment under different welfare regimes. *J Soc Policy* 2014; 43: 727-43.

21. Bremberg SG. The rate of country-level improvements of the infant mortality rate is mainly determined by previous history. *Eur J Public Health* 2016; 26: 597-601.
22. Burroway R. Democracy and child health in developing countries. *Int J Comparat Sociol* 2016; 57: 338-64.
23. Burstrom B, Whitehead M, Clayton S, et al. Health inequalities between lone and couple mothers and policy under different welfare regimes – the example of Italy, Sweden and Britain. *Soc Sci Med* 2010; 70: 912–20.
24. Cereseto S, Waitzkin, H. Economic-development, political-economic system, and the physical quality-of-life. *Am J Public Health* 1986; 76: 661–66.
25. Chuang Y-C, Sung P-W, Chao HJ, et al. A longitudinal ecological study of the influences of political, economic, and health services characteristics on under-five mortality in less-developed countries. *Health Place* 2013; 23: 111-21.
26. Chuang K-Y, Sung P-W, Chang C-J, et al. Political and economic characteristics as moderators of the relationship between health services and infant mortality in less-developed countries. *J Epidemiol Community Health* 2013; 67: 1006-12.
27. Chung H, Muntaner C. Welfare state matters: a typological multilevel analysis of wealthy countries. *Health Policy* 2007; 80:328–39.
28. Chung H. Muntaner C. Political and welfare state determinants of infant and child health indicators: an analysis of wealthy countries. *Soc Sci Med* 2006; 63: 829–42.
29. Conley D, Springer KW. Welfare state and infant mortality. *Am J Sociol* 2001; 107: 768–807.
30. Copeland A, Bambra C, Nylén L, et al. All in it together? The effects of recession on population health and health inequalities in England and Sweden, 1991-2010. *Int J Health Serv* 2015; 45: 3-24.
31. Correa H, Namkoong K. Determinants and effects of health policy. *Journal Policy Model* 1992; 14: 41–63.
32. Corsi DJ, Subramanian SV. Association between coverage of maternal and child health interventions, and under-5 mortality: a repeated cross-sectional analysis of 35 sub-Saharan African countries. *Glob Health Action* 2014; 7: 24765.
33. Costa-Font J, Mas N. ‘Globesity’? The effects of globalization on obesity and caloric intake. *Food Policy* 2016; 64: 121-32.
34. Craveiro D. Ties and inequalities in later life: welfare state regime and the role of social networks in health inequalities in later life in Europe. *Eur Soc* 2017; 19: 268-71.
35. Cross P, Edwards RT, Opondo M, et al. Does farm worker health vary between localised and globalised food supply systems? *Environ Int* 2009; 35: 1004-14.
36. De Vogli RD, Kouvonen A, Elovainio M, et al. Economic globalization, inequality and body-mass index: a cross-national analysis of 127 countries. *Crit Public Health* 2014; 24: 7-21.
37. Dahl E, van der Wel KA. Educational inequalities in health in European welfare states: a social expenditure approach. *Soc Sci Med* 2013; 81:60–9.
38. Dahl E, Fritzell J, Lahelma E, et al. Welfare state regimes and health inequalities. In Siegrist J, Marmot, M, editors. *Social Inequalities in Health: New Evidence and Policy Implications*. Oxford: Oxford University Press; 2006.
39. Deeming C, Hayes D. Worlds of welfare capitalism and wellbeing: a multilevel analysis. *J Soc Policy* 2012; 41: 811-29.
40. Devaux M. Income-related inequalities and inequities in health care services utilisation in 18 selected OECD countries. *Eur J Health Econom* 2015; 16: 21-33.
41. Dietrich S, Bernhard M. State or regime? The impact of institutions on welfare outcomes. *Eur J Develop Res* 2015; 28: 252-69.

42. Doherty AM, Kelly BD. Social and psychological correlates of happiness in 17 European countries. *Irish J Psychol Med* 2010; 27(3): 130-4.
43. Dragano N, Siegrist J, Wahrendorf M. Welfare regimes, labour policies and unhealthy psychosocial working conditions: a comparative study with 9917 older employees from 12 European countries. *J Epidemiol Community Health* 2010; 65: 793-9.
44. Dujardin C, Farfan-Portet M-I, Mitchell R, et al. Does country influence the health burden of informal care? An international comparison between Belgium and Great Britain. *Soc Sci Med* 2011; 73: 1123-32.
45. Eikemo TA, Bambra C, Judge K, et al. Welfare state regimes and differences in self-perceived health in Europe: a multilevel analysis. *Soc Sci Med* 2008; 66: 2281-95.
46. Eikemo TA, Huisman M, Bambra C, et al. Health inequalities according to educational level in different welfare regimes: a comparison of 23 European countries. *Sociol Health Illn* 2008; 30: 565-82.
47. Elgar FJ, Aitken N. Income inequality, trust and homicide in 33 countries. *Eur J Public Health* 2011; 21; 241-6.
48. Elola J, Daponte A, Navarro V. Health indicators and the organization of healthcare systems in Western Europe. *Am J Public Health* 1995; 85: 1397-1401.
49. Engster D, Stensöta HO. Do family policy regimes matter for children's well-being? *Soc Polit* 2011, 18(1):82-124.
50. Esmaeli A, Mansouri S, Moshavash M. Income inequality and population health in Islamic countries. *Public Health* 2011; 125: 577-84.
51. Espelt A, Borrell C, Rodriguez-Sanz, M, et al. Inequalities in health by social class dimensions in European countries of different political traditions. *Int J Epidemiol* 2008; 37: 1095-1105.
52. Esser I, Palme J. Do public pensions matter for health and wellbeing among retired persons? Basic and income security pensions across 13 Western European countries. *Int J Soc Welfare* 2010; 19: S103-20.
53. Estimé MS, Lutz B, Strobel F. Trade as a structural driver of dietary risk factors for noncommunicable diseases in the Pacific: an analysis of household income and expenditure survey data. *Globalization Health* 2014; 10: 48.
54. Fan VY, Faioso Le'au R. Insights in public health: a tale of two polities: health in Independent and American Samoa. *Hawai'i J Med Public Health* 2015; 74: 179-84.
55. Farfan-Portet M, Popham F, Mitchell R, et al. Caring, employment and health among adults of working age: evidence from Britain and Belgium. *Eur J Public Health* 2010; 20: 52-7.
56. Fayissa B. The determinants of infant and child mortality in developing countries: the case of Sub-Saharan Africa. *Rev Black Polit Econ* 2001; 29: 83-100.
57. Foubert J, Levecque K, van Rossem R, et al. Do welfare regimes influence the association between disability and self-perceived health? A multilevel analysis of 57 countries. *Soc Sci Med* 2014; 117: 10-7.
58. Franco A, Alvarez-Dardet C, Ruiz MT. Effect of democracy on health: ecological study, *BMJ* 2004; 329: 1421-23.
59. Frey RS, Al-Roumi A. Political democracy and the physical quality of life: the cross-national evidence. *Soc Indic Res* 1999; 47: 73-97.
60. Fritzell S, Vannoni F, Whitehead M, et al. Does non-employment contribute to the health disadvantage among lone mothers in Britain, Italy and Sweden? Synergy effects and the meaning of family policy. *Health Place* 2012; 18: 199-208.
61. Fritzell J, Kangas O, Bacchus Hertzman J, et al. Cross-temporal and cross-national poverty and mortality rates among developed countries. *J Environ Public Health* 2013; 2013: 915490.

62. Fumagalli E, Mentzakis E, Suhrcke M. Do political factors matter in explaining under- and overweight outcomes in developing countries. *J Socioecon* 2013; 46: 48-56.
63. Gauri V, Khaleghian P. Immunization in developing countries: its political and organizational determinants, *World Dev* 2002; 30: 2109-32.
64. Gerring J, Thacker SC. Do neoliberal economic policies kill or save lives? *Bus Polit* 2008; 10: 1-33.
65. Gesthuizen M, Huijts T, Kraaykamp G. Explaining health marginalisation of the lower educated: the role of cross-national variations in health expenditure and labour market conditions. *Sociol Health Illn* 2012, 34:591-607.
66. Ghobarah HA, Huth P, Russett, B. Comparative public health: the political economy of human misery and well-being. *Int Stud Q* 2004; 48: 73-94.
67. Gilligan AM, Skrepnek GH. Determinants of life expectancy in the Eastern Mediterranean Region. *Health Policy Plan* 2015; 30, 624-37.
68. Gizelis T. Wealth alone does not buy health: political capacity, democracy, and the spread of AIDS. *Polit Geogr* 2009; 28: 121-31.
69. Glass J, Andersson MA, Simon RW. Parenthood and happiness: effects of work-family reconciliation policies in 22 OECD countries. *Am J Sociol* 2016; 122, 886-929.
70. Goryakin Y, Lobstein T, James WPT, et al. The impact of economic, political and social globalization on overweight and obesity in the 56 low and middle income countries. *Soc Sci Med* 2015; 133: 67-76.
71. Granados JAT. Politics and health in eight European countries: a comparative study of mortality decline under social democracies and right-wing governments. *Soc Sci Med* 2010; 71: 841-50.
72. Grosse Frie K, Eikemo TA, Knesebeck OvD. Education and self-reported health care seeking behaviour in European welfare regimes: results from the European Social Survey. *Int J Public Health* 2010; 55: 217-20.
73. Guarnizo-Herreño CC, Tsakos G, Sheiham A, et al. Oral health and welfare state regimes: a cross-national analysis of European countries. *Eur J Oral Sci* 2013; 121: 169-75.
74. Harding S, Lenguerrand E, Costa G, et al. Trends in mortality by labour market position around retirement ages in three European countries with different welfare regimes. *Int J Public Health* 2013; 58: 99-108.
75. Hájek O, Grebeníček P, Popesko B, et al. Czech Republic vs EU-27: economic level, health care and population health. *Cent Eur J Public Health* 2012; 20(3): 167-73.
76. Hauck K, Martin S, Smith PC. Priorities for action on the social determinants of health: empirical evidence on the strongest associations with life expectancy in 54 low-income countries, 1990-2012. *Soc Sci Med* 2016; 167: 88-98.
77. Heijink R, Koolman X, Westert GP. Spending more money, saving more lives? The relationship between avoidable mortality and healthcare spending in 14 countries. *Eur J Health Econ* 2013; 14: 527-38.
78. Hoffman R. Socioeconomic inequality in old-age mortality: a comparison of Denmark and the USA. *Soc Sci Med* 2011; 72: 1986-92.
79. Houweling TAJ, Caspar AEK, Looman WN, et al. Determinants of under-5 mortality among the poor and the rich: a cross-national analysis of 43 developing countries. *Int J Epidemiol* 2005; 34: 1257-65.
80. Huijts T, Perkins JM, Subramanian SV. Political regimes, political ideology and self-rated health in Europe: a multilevel analysis. *PLoS One* 2010; 5: e11711.
81. Jolly CM, Namugabo E, Nguyen G, et al. Net food imports and obesity in selected Latin American & Caribbean countries. *Adv Manag Appl Econom* 2013; 3(6); 159-77.

82. Jorgenson AK. Foreign direct investment and the Environment, the mitigating influence of Institutional and Civil Society factors, and relationships between industrial pollution and human health a panel study of less-developed countries. *Organ Environ* 2009; 22: 135-57.
83. Jorgenson AK. Political-economic integration, industrial pollution and human health: a panel study of less-developed countries, 1980-2000. *Int. Sociol* 2009; 24: 115-43.
84. Karim SA, Eikemo TA, Bambra C. Welfare state regimes and population health: integrating the East Asian welfare states. *Health Policy* 2010; 94: 45–53.
85. Kick EL, Nasser R, Davis BL, et al. Militarization and infant-mortality in the third-world. *J Polit Militar Sociol* 1990; 18: 285-305.
86. Klenk J, Keil U, Jaensch A, et al. Changes in life expectancy 1950-2010: contributions from age- and disease-specific mortality in selected countries. *Population Health Metrics* 2016; 14: 20.
87. Klomp J, de Haan J. Effects of governance on health: a cross-national analysis of 101 Countries. *Kyklos* 2008; 61: 599–614.
88. Klomp J, de Haan, J. Is the political system really related to health? *Soc Sci Med* 2009; 69: 36–46.
89. Krueger PM, Dovel K, Denney JT. Democracy and self-rated health across 67 countries: a multilevel analysis. *Soc Sci Med* 2015; 143: 137.
90. Kudamatsu M. Has democratization reduced infant mortality in sub-Saharan Africa? *J Eur Econ Assoc* 2012; 10: 1294-317.
91. Kouvo A, Räsänen P. Foundations of subjective well-being in turbulent times: a comparison of four European countries. *Int J Sociol Soc Policy* 2015; 35: 2-17.
92. Lahelma E, Arber S. Health inequalities among men and women in contrasting welfare states: Britain and three Nordic countries compared. *Eur J Public Health* 1994; 37: 213–26.
93. Lake DA, Baum MA. The invisible hand of democracy – political control and the provision of public services. *Comp Polit Stud* 2001; 34: 587–621.
94. Lena HF, London B. The political and economic-determinants of health outcomes – a cross-national analysis. *Int J Health Serv* 1993; 23: 585–602.
95. Levecque K, van Rossem R, de Boyser K, et al. Economic hardship and depression across the life course: the impact of welfare state regimes. *J Health Soc Behav* 2011; 52: 262-76.
96. Levecque K, Van Rossem R. Depression in Europe: does migrant integration have mental health payoffs? A cross-national comparison of 20 European countries. *Ethn Health* 2015; 20: 49-65.
97. Levine DI, Rothman D. Does trade affect child health? *J Health Econ* 2006; 25: 538-54.
98. Lin R-T ,Chen Y-M, Chien L-C, et al. Political and social determinants of life expectancy in less developed countries: a longitudinal study. *BMC Public Health* 2012; 12: 85
99. Lin R-T, Chien L-C, Chen Y-M, et al. Governance matters: an ecological association between governance and child mortality. *Int Health* 2014; 6: 249-57.
100. London B, Williams BA. National politics, international dependency, and basic needs provision – a cross-national analysis. *Soc Forces* 1990; 69: 565–84.
101. López-Casasnovas G, Soley-Bori M. The socioeconomic determinants of health: economic growth and health in the OECD countries during the last three decades. *Int J Environ Res Public Health* 2014; 11: 815-29.
102. Lundberg O, Yngwe MA, Stjerne MK, et al. The role of welfare state principles and generosity in social policy programmes for public health: an international comparative study. *Lancet* 2008; 372: 1633–40.

103. McKinnon B, Harper S, Kaufman JS. Do socioeconomic inequalities in neonatal mortality reflect inequalities in coverage of maternal health services? Evidence from 48 low- and middle-income countries. *Matern Child Health J* 2016; 20: 434-6.
104. Mackenbach JP. Political conditions and life expectancy in Europe, 1990-2008. *Soc Sci Med* 2013; 82: 134-46.
105. Mackenbach JP, Hu Y, Looman CWN. Democratization and life expectancy in Europe, 1960-2008. *Soc Sci Med* 2013; 93: 166-75.
106. Mackenbach JP, McKee M. A comparative analysis of health policy performance in 43 European countries. *Eur J Public Health* 2013; 23: 195-201.
107. Martens P, Akin SM, Maud H, et al. Is globalization healthy: a statistical indicator analysis of the impacts of globalization on health. *Glob. Health* 2010; 6:16.
108. Maynard G. Neoliberal trade and investment policies, the ITGA and youth smoking rates: a cross-national analysis of developing nations. *Sociol Spectr* 2015; 35: 419-41.
109. Maynard G. Health international non-governmental organizations, democracy, and tuberculosis mortality in developing nations: a longitudinal analysis. *Sociol Spectr* 2016; 36: 303-20.
110. Miething A, Lundberg O, Geyer S. Income and health in different welfare contexts: a comparison of Sweden, East and West Germany. *Scand J Public Health* 2013; 41: 260-8.
111. Menon-Johansson MA. Good governance and good health: the role of societal structures in the human immunodeficiency virus pandemic. *BMC Int Health Hum Rights* 2005; 5: 96-111.
112. Milner A, McLure R, Sun J, et al. Globalization and suicide: an empirical investigation in 35 countries over the period 1980-2006. *Health Place* 2011; 17: 996-1003.
113. Minagawa Y. Inequalities in healthy life expectancy in Eastern Europe. *Populat Dev Rev* 2013; 39: 649-71.
114. Moon BE, Dixon WJ. Politics, the state, and basic human-needs – a cross-national-study. *Am J Polit Sci* 1985; 29: 661-94.
115. Moor N, de Graaf PM, Komter A. Family, welfare state generosity and the vulnerability of older adults: a cross-national survey. *J Aging Stud* 2013; 27: 347-57.
116. Moore S, Teixeira AC, Shiell, A. The health of nations in a global context: trade, global stratification, and infant mortality rates. *Soc Sci Med* 2006; 63: 165-78.
117. Mukherjee N, Kriekhaus J. Globalization and human well-being. *Int Polit Sci Rev* 2012; 33(2): 150-70.
118. Muldoon KA, Galway LP, Nakajima M, et al. Health system determinants of infant, child and maternal mortality: a cross-sectional study of UN member countries. *Global Health* 2011; 7:42.
119. Muntaner C, Davis O, McIsaack K, et al. Retrenched welfare regimes still lessen social class inequalities in health: a longitudinal analysis of the 2003-2010 EU-SILC in 23 European countries. *Int J Health Serv* 2017; 47: 410-31.
120. Muntaner C, Borrell C, Kunst A, et al. Social class inequalities in health: does welfare state regime matter? In Raphael D, Bryant T, Rioux MH, editors. *Staying alive: critical perspectives on health, illness, and health care*. Toronto: Canadian Scholars Press; 2006.
121. Muntaner C, Lynch JW, Hillemeier M, et al. Economic inequality, working-class power, social capital, and cause-specific mortality in wealthy countries. *Int J Health Serv* 2002; 32: 629-56.

122. Navarro V, Muntaner C, Borrell C, et al. Politics and health outcomes. *Lancet* 2006; 368: 1033–37.
123. Navarro V, Borrell C, Benach J, et al. The importance of the political and the social in explaining mortality differentials among the countries of the OECD, 1950–1998. *Int J Health Serv* 2003; 33: 419–94.
124. Navarro V, Shi LY. The political context of social inequalities and health. *Int J Health Serv* 2001; 31: 1–21.
125. Navia P, Zweifel TD. Democracy, dictatorship, and infant mortality revisited. *J Democracy* 2003; 14: 90–103.
126. Nelson K, Fritzell J. Welfare states and population health: the role of minimum income benefits for mortality. *Soc Sci Med* 2014; 112: 63-71.
127. Nordenmark M, Strandh M, Layte R. The impact of unemployment benefit system on the mental well-being of the unemployed in Sweden, Ireland and Great Britain. *Eur Societies* 2006; 8: 83–110.
128. Novignon J, Olakojo SA, Novignon J. The effects of public and private health care expenditure on health status in sub-Saharan Africa: new evidence from panel data analysis. *Health Econ Rev* 2012; 2: 22.
129. Oberlander L, Disdier A-C, Etilé F. Globalisation and national trends in nutrition and health: A grouped fixed-effects approach to intercountry heterogeneity. *Health Econ* 2017; 26: 1146-61.
130. Olafsdottir S. Fundamental causes of health disparities: stratification, the welfare state, and health in the United States and Iceland. *J Health Soc Behav* 2007; 48: 239-253.
131. Olsen KM, Dahl SA. Health differences between European countries. *Soc Sci Med* 2007, 64: 1665-78.
132. Oster E. Routes of infection: exports and HIV incidence in sub-Saharan Africa. *J Eur Econ Assoc* 2012; 10: 1025-58.
133. Ouweneel P. Social security and well-being of the unemployed in 42 nations. *J Happiness Stud* 2002; 3: 167–92.
134. Owen AL, Wu S. Is trade good for your health? *Rev Int Econ* 2007; 15: 660-82.
135. Palència L, Malmusi D, de Moortel D, et al. The influence of gender equality policies on gender inequalities in health in Europe. *Soc Sci Med* 2013; 117: 25-33.
136. Pickett KE, Wilkinson RG. Child wellbeing and income inequality in rich countries: ecological cross sectional study. *BMJ* 2007; 335: 1080.
137. Pillai VK, Gupta R. Cross-national analysis of a model of reproductive health in developing countries. *Soc Sci Res* 2006; 35: 210–27.
138. Pinzón-Flórez CE, Fernández-Niño JA, Ruiz-Rodríguez M, et al et al. Determinants of performance of health systems concerning maternal and child health: a global approach. *PLoS ONE* 2015; 10: e0120747.
139. Platts LG. A prospective analysis of labour market status and self-rated health in the UK and Russia. *Econ Transit* 2015; 23(2): 343-70.
140. Ploubidis GB, Dale C, Grundy E. Later life health in Europe: how important are country level influences? *Eur J Ageing* 2012; 9:5–13.
141. Popham F, Dibben C, Bambra C. Are health inequalities really not the smallest in the Nordic welfare states? A comparison of mortality inequality in 37 countries. *J Epidemiol Community Health* 2013; 67: 412-8.
142. Raphael D, Bryant T. The welfare state as a determinant of women's health: support for women's quality of life in Canada and four comparison nations. *Health Policy* 2004; 68: 63–79.

143. Reeves A, Basu S, McKee M, et al. Social protection and tuberculosis control in 21 European countries, 1995-2012: a cross-national statistical modelling analysis. *Lancet Infect Dis* 2014; 14: 1105-12.
144. Richter M, Rathman K, Nic Gabhainn S, et al. Welfare state regimes, health and health inequalities in adolescence: a multilevel study in 32 countries. *Sociol Health Illn* 2012; 34: 858-79.
145. Ross M. Is democracy good for the poor? *Am J Polit Sci* 2006; 50: 860-74.
146. Rostila M. Social capital and health in European welfare regimes: a multilevel approach. *J Eur Soc Policy* 2007; 17: 223-39.
147. Rovny AE. Welfare state policy determinants of fertility level: a comparative analysis. *J Eur Soc Policy* 2011; 21: 335-47.
148. Rudra N, Haggard S. Globalization, democracy, and effective welfare spending in the developing world. *Comp Polit Stud* 2005; 38: 1015-49.
149. Sacker A, Worts D, McDonough P. Social influences on trajectories of self-rated health: evidence from Britain, Germany, Denmark and the USA. *J Epidemiol Community Health* 2011; 65:130-6.
150. Safaei J. Is democracy good for health? *Int J Health Serv* 2006; 36: 767-86.
151. Sanders AE, Slade GD, John MT, et al. A cross-national comparison of income gradients in oral health quality of life in four welfare states: application of the Korpi and Palme typology. *J Epidemiol Community Health* 2009; 63: 569-74.
152. Sarti S, Alberio M, Terraneo M. Health inequalities and the welfare state in European families. *J Sociol Soc Welfare Needs* 2013; 40: 103-30.
153. Sekine M, Chandola T, Martikainen P, et al. Socioeconomic inequalities in physical and mental functioning of British, Finnish, and Japanese civil servants: role of job demand, control, and work hours. *Soc Sci Med* 2009; 69: 1417-25.
154. Shandra JM, Shandra CL, London B. Do non-governmental organizations impact health? A cross-national analysis of infant mortality. *Int J Comp Sociol* 2010; 51: 137-164.
155. Shandra JM, Nobles J, London B, et al. Dependency, democracy, and infant mortality: a quantitative, cross-national analysis of less developed countries. *Soc Sci Med* 2004; 59: 321-33.
156. Shen C, Williamson JB. Accounting for cross-national differences in infant mortality decline (1965-1991) among less developed countries: effects of women's status, economic dependency, and state strength. *Soc Ind Res* 2001; 53: 257-88.
157. Shen C, Williamson JB. Child mortality, women's status, economic dependency, and state strength: a cross-national study of less developed countries, *Social Forces* 1997; 76: 667-700.
158. Shim J. Social welfare expenditures and infant mortality. *Soc Work Public Health* 2015; 30: 567-77.
159. Stavrova O, Schlösser T, Fetchenhauer D. Are the unemployed equally unhappy all over the world? The role of the social norms to work and welfare state provision in 28 OECD countries. *J Econ Psychol* 2011; 32: 159-71.
160. Stroup MD. Economic freedom, democracy, and the quality of life. *World Dev* 2007; 35: 52-66.
161. Stuckler D, Basu S, McKee M. Budget crises, health, and social welfare programmes. *BMJ* 2010, 340:c3311.
162. Tsai MC. Does political democracy enhance human development in developing countries? A cross-national analysis, *Am J Econ Sociol* 2006; 65: 233-68.



163. Van der Heuvel M, Hopkins J, Biscaro A, et al. A comparative analysis of early child health and development services and outcomes in countries with different redistributive policies. *BMC Public Health* 2013; 13: 1049.
164. Van der Wel KA, Dahl E, Thielen K. Social inequalities in 'sickness': European welfare states and non-employment among the chronically ill. *Soc Sci Med* 2011; 73: 1608-17.
165. Van Tuyckom C. Macro-environmental factors associated with leisure-time physical activity: a cross-national analysis of EU countries. *Scand J Public Health* 2011; 39: 419-26.
166. Vahid Shahidi F, Siddiqi A, Muntaner C. Does social policy moderate the impact of unemployment on health? A multilevel analysis of 23 welfare states. *Eur J Public Health*. *Eur J Public Health* 2016; 26: 1017-22.
167. Veenhoven R. Well-being in the welfare state. *J Comp Policy Anal* 2000; 2: 91–125.
168. Veenhoven R, Ouweneel P. Livability of the welfare-state – appreciation-of-life and length-of-life in nations varying in state-welfare-effort. *Soc Indic Res* 1995; 36: 1–48.
169. Vöörmann R, Helemäe J. A comparative analysis of gender differences in self-rated health: is the Baltic Sea a frontier of the East-West health divide in Europe? *Filosofija-Sociologija* 2013; 24(2): 62-70.
170. Wejnert B. Effect of global democracy on women's reproductive health: 1970–2005, cross-world analysis. *Marriage Fam Rev* 2008; 41 (3-4): 14–37.
171. Whitehead M, Burstrom B, Diderichsen, F. Social policies and the pathways to inequalities in health: a comparative analysis of lone mothers in Britain and Sweden. *Soc Sci Med* 2000; 50: 255–70.
172. Witvliet MI, Kunst A, Arah OA, et al. Sick regimes and sick people: a multilevel investigation of the population health consequences of perceived national corruption. *Trop Med Internat Health* 2013; 18: 1240-7.
173. Wu JCL, Chiang TL. Comparing child mortality in Taiwan and selected industrialized countries. *J Formos Med Assoc.* 2007, 106 (2): 177-180.
174. York R, Bell SE. Life satisfaction across nations: the effects of women's political status and public priorities. *Soc Sci Res* 2014; 48: 48-61.
175. Zambon A, Boyce W, Cois E, et al. Do welfare regimes mediate the effect of socioeconomic position on health in adolescence? A cross-national comparison in Europe, North America, and Israel. *Int J Health Serv* 2006; 36: 309-29.
176. Zweifel TD, Navia P. Democracy, dictatorship, and infant mortality. *J Democracy* 2000; 11: 99–114.
