# Supplementary material for: How much evidence is there that political factors are related to population health outcomes? An internationally comparative systematic review
Source: PubMed Central journal article supplement — BMJ Open. 2018 Oct 18;8(10):e020886. doi: 10.1136/bmjopen-2017-020886 (PMC6196855; doi:10.1136/bmjopen-2017-020886), 2018-10-18
Supplement: bmjopen-2017-020886supp004.pdf [file bmjopen-2017-020886supp004.pdf]

#### **Supplementary file 4. List of all publications excluded at full-text screening, with reasons**

1. Abbott P, Wallace C. Exploring economic and social transformations in post-Soviet Russia, Ukraine and Belarus. *Eur Societies* 2010; 12: 653-74. No eligible comparisons.
2. Aggarwal S. 2010-2012 global health care reforms and their impact on pricing, access and health outcomes strategy. *Value Health* 2012; 15(7): A291. Abstract only.
3. Aldabe B, Anderson R, Lyly-Yrjänäinen, et al. Contribution of material, occupational, and psychosocial factors in the explanation of social inequalities in health in 28 countries in Europe. *J Epidemiol Community Health* 2011; 65: 1123-31. No eligible exposures.
4. Alsan M, Bloom DE, Canning D. The effect of population health on foreign direct investment inflows to low-and middle-income countries. *World Dev* 2006; 34: 613-30. No eligible comparisons.
5. Alves S. Welfare state changes and outcomes – the cases of Portugal and Denmark from a comparative perspective. *Soc Pol Adm* 2015; 49: 1-23. Study design.
6. Amouzou A, Kozuki N, Gwatkin DR. Where is the gap? The contribution of disparities within developing countries to global inequalities in under-five mortality. *BMC Public Health* 2014; 14: 216. No eligible exposures.
7. Arán-Matero D, Amico P, Arán-Fernandez C, et al. Levels of spending and resource allocation to HIV programs and services in Latin America and the Caribbean. *PLoS ONE* 2011; 6: e22373. No eligible comparisons.
8. Arnold RG, Heyworth J, Sáez AE, et al. The status of water and sanitation among Pacific Rim nations. *Rev Environ Health* 2011; 26: 17-30. No eligible comparisons.
9. Atikeler K, Piniakho O. Pricing and reimbursement policies of Turkey and Ukraine. *Value in Health* 2015; 18(7): A573. Abstract only.
10. Azemar C, Desbordes R. Public governance, health and foreign direct investment in sub-Saharan Africa. *J Afr Econ* 2009; 18: 667-709. No eligible comparisons.
11. Balaj M, McNamara CL, Eikemo TA, et al. The social determinants of inequalities in self-reported health in Europe: findings from the European social survey (2014) special module on the social determinants of health. *Eur J Public Health* 2017; 27: 107-14. No eligible comparisons.
12. Basch CH, Samuel L, Ethan D. Obesity, diabetes and heart disease: effects of globalization on population health, preventive efforts, and the importance of social change. *Int J Health Promot Educ* 2013; 51: 185-97. Study design.
13. Basu S, McKee M, Galea G, et al. Relationship of soft drink consumption to global overweight, obesity, and diabetes: a cross-national analysis of 75 countries. *Am J Public Health* 2013; 103: 2071-7. No eligible exposures.
14. Bayati M, Akbarian R, Kavosi Z. Determinants of life expectancy in eastern mediterranean region: a health production function. *Int J Health Policy Manag* 2013; 1: 57-61. No relevant comparisons.
15. Beckfield J, Olafsdottir S, Bakhtiari E. Health inequalities in global context. *Am Behav Sci* 2013; 57: 1014-39. No eligible comparisons.

16. Bernard S, Hotte L, Winer SL. Democracy, inequality and the environment when citizens can mitigate health consequences of pollution privately or act collectively. *Eur J Polit Econ* 2014; 34: 142-56. Study design.
17. Borrell C, Morrison J, Burstrom B, et al. Comparison of health policy documents of European cities: are they oriented to reduce inequalities in health? *J Public Health Policy* 2013; 34: 100-20. Study design.
18. Brady D, Marquandt S, Gauchat G, et al. Path dependency and the politics of socialized health care. *J Health Politics Pol Law* 2016; 41: 355-92. No eligible outcomes.
19. Burstrom B, Whitehead M, Clayton S, et al. Health inequalities between lone and couple mothers and policy under different welfare regimes – the example of Italy, Sweden and Britain. *Soc Sci Med* 2010; 70: 912–20. Duplicate.
20. Carbone G. Do new democracies deliver social welfare? Political regimes and health policy in Ghana and Cameroon. *Democratization* 2012; 19(2): 157-83. No relevant outcomes.
21. Chauvel L, Leist AK. Socioeconomic hierarchy and health gradient in Europe: the role of income inequality and of social origins. *Int J Equity Health* 2015; 14: 132. No eligible exposures.
22. Clark SE, Hawkes C, Murphy SM, et al. Exporting obesity: US farm and trade policy and the transformation of the Mexican consumer food environment. *Int J Occupat Environ Health* 2012; 18: 54-64. No eligible comparisons.
23. Christiansen NV, Kahlmeier S, Racioppi F. Sport promotion policies in the European Union: results of a contents analysis. *Scand J Med Sci Sports* 2014; 24: 428-38. Study design.
24. Chuang K-Y, Sung P-W, Chang C-J, et al. Political and economic characteristics as moderators of the relationship between health services and infant mortality in lessdeveloped countries. *J Epidemiol Community Health* 2013; 67: 1006-12. Duplicate.
25. Cross P, Edwards RT, Nyeko P, et al. The potential impact on farmer health of enhanced export horticultural trade between the U.K. and Uganda. *Int J Environ Res Public Health* 2009; 6: 1539-56. No eligible comparisons.
26. De Andrade LOM, Pellegrini Fillho A, Solar O, et al. Social determinants of health, universal health coverage, and sustainable development.: case studies from Latin American countries. *Lancet* 2015; 385: 1343-51. Study design.
27. De Vogli R, Kouvonen A, Gimeno D. ‘Globesization’: ecological evidence on the relationship between fast food outlets and obesity among 26 advanced economies. *Crit Public Health* 2011; 21: 395-402. No eligible exposures.
28. Docherty WJ, Mendenhall TJ, Berge JM. The Families and Democracy and Citizen Health Care Project. *J Marital Family Ther* 2010; 36: 389-402. No relevant comparisons.
29. Etherington D, Ingold J. Welfare to work and the inclusive labour market: a comparative study of activation policies for disability and long-term sickness claimants in the UK and Denmark. *J Eur Soc Policy* 2012; 22(1): 30-44. No eligible outcomes.
30. Elgar FJ, Davis CG, Wohl MJ, et al. Social capital, health and life satisfaction in 50 countries. *Health Place* 2011; 17, 1044-53. No eligible exposures.
31. Fazel S, Geddes JR, Kushel M. The health of homeless people in high-income countries: descriptive epidemiology, health consequences, and clinical and policy recommendations. *Lancet* 2014; 384, 1529-40. Not primary research.
32. Ferrarini T, Sjöberg O. Social policy and health: transition countries in a comparative analysis. *Int J Soc Welfare* 2010; 19: S60-88. Study design.
33. Friel S, Gleeson D, Thow A-M, et al. A new generation of trade policy: potential risks to diet-related health from the trans pacific partnership agreement. *Global Health* 2013; 9: 46. Study design.

34. Gregorio LE, Gregorio DI. Polity and health care expenditures: the association among 159 nations. *J Epidemiol Global Health* 2013; 3: 49-57. No eligible outcomes.
35. Gustafsson N-KJ, Ramstedt MR. Changes in alcohol-related harm in Sweden after increasing alcohol import quotas and a Danish tax decrease - an interrupted time-series analysis for 2000-2007. *Int J Epidemiol* 2011; 40, 432-40. No eligible comparisons.
36. Habibov NN, Afandi EN. Self-rated health and social capital in transitional countries: multilevel analysis of comparative surveys in Armenia, Azerbaijan and Georgia. *Soc Sci Med* 2011; 72: 1993-204. No eligible exposures.
37. Habibov N. Who wants to redistribute? An analysis of 14 post-Soviet nations. *Soc Policy Admin* 2013; 47: 262-86. No eligible outcomes.
38. Harding R, Stasavage D. What democracy does (and doesn't do) for basic services: school fees, school inputs, and African elections. *J Politics* 2013; 76: 229-45. No eligible outcomes.
39. Herwartz H, Theilen B. Health care and ideology: a reconsideration of political determinants of public healthcare funding in the OECD. *Health Econom* 2014; 23, 225-40. No eligible outcomes.
40. Herwartz H, Theilen B. Partisan influence on social spending under market integration, fiscal pressure and institutional change. *Eur J Polit Econ* 2014; 34, 40924. No eligible outcomes.
41. Hicken A, Kollman K, Simmons JW. Party system nationalization and the provision of public health services. *Polit Sci Res Meth* 2016; 4: 573-94. No eligible exposures.
42. Higo M, Khan HTA. Global population aging: unequal distribution of risks in later life between developed and developing countries. *Glob Soc Policy* 2015; 15(2): 146-66. Study design.
43. Hogan MC, Foreman KJ, Naghavi M, et al. Maternal mortality for 181 countries, 1880-2008: a systematic analysis of progress towards Millennium Development Goal 5. *Lancet* 2010; 375, 1609-23. Study design.
44. Huber E, Mustillo T, Stephens JD. Politics and social spending in Latin America. *J Polit* 2008; 70: 420-36. No eligible outcomes.
45. James PD, Wilkins R, Detsky AS, et al. Avoidable mortality by neighbourhood income in Canada: 25 years after the establishment of universal health insurance. *J Epidemiol Community Health*. 2007, 61: 287-96. No eligible comparisons.
46. Jensen C. Two sides of the same coin? Left-wing governments and labour unions as determinants of public spending. *Socioeconom Rev* 2012; 10: 217-40. No eligible outcomes.
47. Jensen C. Marketization via compensation: health care and the politics of the right in advanced industrialized nations. *Br J Polit Sci* 2011; 41: 907-26. Study design.
48. Kaufman RR, Segura-Ubiergo A. Globalization, domestic politics and social spending in Latin America: a time-series cross-section analysis, 1973-1997. *Dados* 2001; 44: 435-79. No eligible outcomes.
49. Kawachi I. Globalization and workers' health. *Ind. Health* 2008; 46: 421-23. Study design.
50. Kawiorska D. Healthcare in the light of the concept of welfare state regimes: comparative analysis of EU member states. *Oeconomia Coperanicana* 2016; 7: 187206. No eligible outcomes.
51. Korda RJ, Butler JR, Clements MS, et al. Differential impacts of health care in Australia: trend analysis of socioeconomic inequalities in avoidable mortality. *Int J Epidemiol*. 2007; 36: 157-165. No eligible comparisons.
52. Koutsogeorgou E, Nyqvist F, Nygård M, et al. Social capital and self-rated health among older adults: a comparative analysis of Finland, Poland and Spain. *Ageing Soc* 2015; 35: 653-67. No eligible exposures.
53. Levecque K, van Rossem R, Ronda E, et al. Depression in different welfare state regimes in Europe: the role of attitudes towards state responsibility for an adequate standard of living. *J Epidemiol Community Health* 2011; 65: A126. Abstract only.

54. Liang LL, Mirelman AJ. An assessment of socio-political determinants and international aid for government health expenditures. *Soc Sci Med* 2014; 114: 161-8. No eligible outcomes.
55. McMichael AJ. Globalization, climate change, and human health. *N Engl J Med* 2013; 368: 1335-43. Study design.
56. Mackenbach JP. Cultural values and population health: a quantitative analysis of variations in cultural values, health behaviours and health outcomes among 42 European countries. *Health Place* 2014; 28: 116-32. No eligible exposures.
57. Mackenbach JP, Karanikolos M, Lopez Bernal J, et al. Why did life expectancy in Central and Eastern Europe suddenly improve in the 1990s? An analysis by cause of death. *Scand J Public Health* 2015; 43: 796-801. No eligible exposures.
58. Marmot M, Allen J, Bell R, et al. WHO European review of social determinants of health and the health. *Lancet* 2012; 380: 1011-29. Study design.
59. Marten R, McIntyre D, Travassos C, et al. An assessment of progress towards universal health coverage in Brazil, Russia, India, China, and South Africa (BRICS). *Lancet* 2014; 384: 2164-71. Study design.
60. Minicuci N, León Díaz EM, Gómez León M, et al. Disability-free life expectancy: a cross-national comparison among Bulgarian, Italian and Latin American older population. *J Aging Health* 2011; 23: 629-81. No eligible political variables.
61. Moene KO, Wallerstein M. Earnings inequality and welfare spending – a disaggregated analysis. *World Polit* 2003; 55: 485–516. No eligible outcomes.
62. Molina-Mula J, de Pedro-Gómez JE. Impact of the politics of austerity in the quality of healthcare: ethical advice. *Nurs Philosoph* 2013; 14: 53-60. Study design.
63. Moller S, Misra J, Strader E. A cross-national look at how welfare states reduce inequality. *Sociol Compass* 2013; 7(2): 135-46. Study design.
64. Mukhopadhyay K, Chaudhuri S. Economic liberalisation, gender wage inequality and welfare. *J Internat Econ Dev* 2013; 22: 1214-39. No relevant outcomes.
65. Muntaner C. Democracy, authoritarianism, political conflict and population health: a global, comparative, and historical approach. *Soc Sci Med* 2013; 86: 107-12. Study design.
66. Muntaner C, Borrell C, Solà J, et al. Class relations and all-cause mortality: a test of Wright's social class scheme using the Barcelona 2000 Health Interview Survey. *Int J Health Serv* 2011; 41: 431-58. No relevant comparisons.
67. Muntaner C, Benach J, Chung H, et al. Welfare state, labour market inequalities and health. In a global context: an integrated framework. *SESPAS Report 2010. Gaceta Sanitaria* 2010; 24: 56-61. Study design.
68. Muntaner C, Chung H, Solar O, et al. A macro-level model of employment relations and health inequalities. *Int J Health Serv* 2010; 40(2): 215-21. Study design.
69. Nyquist F, Nygård M. Is the association between social capital and health robust across the Nordic regions? Evidence from a cross-sectional survey of older adults. *Int J Soc Welfare* 2013; 22(2): 119-29. No eligible exposures.
70. Or Z, Cases C, Lisac M, et al. Are health problems systemic? Politics of access and choice under Beveridge and Bismarck systems? *Health Econom Policy Law* 2010; 5: 269-93. Study design.
71. Raine KD. Obesity epidemics: inevitable outcome of globalization or preventable public health challenge? *Int J Public Health* 2012; 57: 35-6. Study design.
72. Razzak JA, Khan UR, Azam I, et al. Health disparities between Muslim and non-Muslim countries. *East Mediterr Health J* 2011; 18: 654-64. No eligible exposures.
73. Reeves A, McKee M, Basu S, et al. The political economy of austerity and healthcare: cross-national analysis of expenditure changes in 27 European nations, 1995-2011. No eligible outcomes.

74. Simons AMW, Groffen DAI, Bosma H. Socio-economic inequalities in all-cause mortality in Europe: an exploration of the role of heightened social mobility. *Eur J Public Health* 2013; 23: 1010-2. No eligible exposures.
75. Vågerö D. The East-West health divide in Europe: growing and shifting eastwards. *J Soc Pol Studs* 2010; 8(3): 319-30. Study design.
76. Victora CG, Barros AJD, Axelson H, et al. How changes in coverage affect equity in maternal and child health interventions in 35 Countdown to 2015 countries: an analysis of national surveys. *Lancet* 2012; 380: 1149-56. No eligible exposures.
77. Wahrendorf M, Reinhardt JD, Siegrist J. Relationships of disability with age among adults aged 50 to 85: evidence from the United States, England and Continental Europe. *PLoS ONE* 2013; 8: e71893. No eligible exposures.
78. Wang Y, Lim H. The global childhood obesity epidemic and the association between socio-economic status and childhood obesity. *Int Rev Psychiatr* 2012; 24: 176-88. No eligible exposures.
79. Wilkinson RG, Pickett K. *The spirit level: why equality is better for everyone*. London: Penguin; 2010. Study design.
80. Wismar M, McQueen D, Lin V, et al. Rethinking the politics and implementation of health in all policies. *Israel J Health Policy Res* 2013; 2: 17. Study design.
81. Yamashita T, Kunkel SR. An international comparison of the association among literacy, education and health across the United States, Canada, Switzerland, Italy, Norway and Bermuda: implications for health disparities. *Asian J Soc Psychol* 2016; 18: 264-74. No eligible exposures.
82. Younsi M, Chakroun M. Does social capital determine health? Empirical evidence from MENA countries. *Soc Sci J* 2016; 53(3): 371-9. No eligible exposures.
