# Supplementary material for: How much evidence is there that political factors are related to population health outcomes? An internationally comparative systematic review
Source: PubMed Central journal article supplement — BMJ Open. 2018 Oct 18;8(10):e020886. doi: 10.1136/bmjopen-2017-020886 (PMC6196855; doi:10.1136/bmjopen-2017-020886), 2018-10-18
Supplement: bmjopen-2017-020886supp006.pdf [file bmjopen-2017-020886supp006.pdf]

**Supplementary file 6.** Study-level risk of bias assessment

Green = high quality (low risk of bias); Amber = moderate quality (moderate risk of bias) or unknown; Red = low quality (high risk of bias)

| First author, year   | Selection bias                 | Selection bias    | Chance                | Detection bias   | Detection bias  | Detection/Reporting bias | Reporting bias       | Summary |
|----------------------|--------------------------------|-------------------|-----------------------|------------------|-----------------|--------------------------|----------------------|---------|
|                      | Participant representativeness | Group equivalence | Sample size rationale | Exposure measure | Outcome measure | Appropriate analysis     | Conflict of interest |         |
| Ades, 2013           | Green                          | Amber             | Green                 | Green            | Green           | Green                    | Green                | Green   |
| Adeyi, 1997          | Green                          | Amber             | Amber                 | Green            | Green           | Green                    | Green                | Green   |
| Akinci, 2014         | Green                          | Amber             | Amber                 | Green            | Green           | Green                    | Amber                | Amber   |
| Alvarez-Dardet, 2006 | Green                          | Amber             | Green                 | Green            | Green           | Green                    | Green                | Green   |
| Avendano, 2009       | Green                          | Amber             | Amber                 | Green            | Green           | Green                    | Amber                | Amber   |
| Bambra, 2014         | Green                          | Amber             | Green                 | Green            | Green           | Green                    | Green                | Green   |
| Bambra, 2009         | Green                          | Amber             | Amber                 | Green            | Green           | Green                    | Amber                | Amber   |
| Bambra, 2009         | Green                          | Amber             | Amber                 | Green            | Green           | Green                    | Green                | Green   |
| Bambra, 2006         | Green                          | Amber             | Amber                 | Green            | Green           | Green                    | Amber                | Amber   |
| Bambra, 2005         | Green                          | Amber             | Amber                 | Green            | Green           | Green                    | Amber                | Amber   |
| Batniji, 2014        | Green                          | Amber             | Green                 | Green            | Green           | Green                    | Green                | Green   |
| Baum, 2003           | Green                          | Amber             | Amber                 | Green            | Green           | Green                    | Amber                | Amber   |









|                    |       |        |        |       |       |       |        |        |
|--------------------|-------|--------|--------|-------|-------|-------|--------|--------|
| Jorgenson,<br>2009 | Green | Yellow | Yellow | Green | Green | Green | Yellow | Yellow |
| Jorgenson,<br>2009 | Green | Yellow | Yellow | Green | Green | Green | Yellow | Yellow |
| Karim,<br>2010     | Green | Yellow | Yellow | Green | Green | Green | Yellow | Yellow |
| Kick, 1990         | Green | Yellow | Yellow | Green | Green | Green | Yellow | Yellow |
| Klenk, 2016        | Green | Yellow | Green  | Green | Green | Green | Green  | Green  |
| Klomp,<br>2008     | Green | Yellow | Yellow | Green | Green | Green | Yellow | Yellow |













| First author, year  | Selection bias                 | Selection bias    | Chance                | Detection bias   | Detection bias  | Detection/Reporting bias | Reporting bias       | Summary |
|---------------------|--------------------------------|-------------------|-----------------------|------------------|-----------------|--------------------------|----------------------|---------|
|                     | Participant representativeness | Group equivalence | Sample size rationale | Exposure measure | Outcome measure | Appropriate analysis     | Conflict of interest |         |
| Van Tuyckom, 2011   | Green                          | Amber             | Green                 | Green            | Green           | Green                    | Green                | Green   |
| Vahid Shahidi, 2016 | Green                          | Amber             | Amber                 | Green            | Green           | Green                    | Green                | Green   |
| Veenhoven, 2000     | Green                          | Amber             | Amber                 | Green            | Green           | Green                    | Amber                | Amber   |
| Veenhoven, 1995     | Green                          | Amber             | Amber                 | Green            | Green           | Green                    | Amber                | Amber   |
| Vöörmann, 2013      | Amber                          | Amber             | Amber                 | Green            | Green           | Green                    | Amber                | Amber   |
| Wejnert, 2008       | Green                          | Amber             | Amber                 | Green            | Green           | Green                    | Amber                | Amber   |
| Whitehead, 2000     | Amber                          | Amber             | Amber                 | Green            | Green           | Green                    | Green                | Amber   |
| Witvliet, 2013      | Green                          | Amber             | Amber                 | Green            | Green           | Green                    | Green                | Green   |
| Wu, 2007            | Green                          | Amber             | Amber                 | Green            | Green           | Green                    | Amber                | Amber   |
| York, 2014          | Green                          | Amber             | Green                 | Green            | Green           | Green                    | Amber                | Green   |
| Zambon, 2006        | Green                          | Amber             | Amber                 | Green            | Green           | Green                    | Amber                | Amber   |
| Zweifel, 2000       | Green                          | Amber             | Amber                 | Green            | Green           | Green                    | Amber                | Amber   |

Green = high quality (low risk of bias); Amber = moderate quality (moderate risk of bias) or unknown; Red = low quality (high risk of bias)
