# Supplementary material for: How much evidence is there that political factors are related to population health outcomes? An internationally comparative systematic review
Source: PubMed Central journal article supplement — BMJ Open. 2018 Oct 18;8(10):e020886. doi: 10.1136/bmjopen-2017-020886 (PMC6196855; doi:10.1136/bmjopen-2017-020886), 2018-10-18
Supplement: bmjopen-2017-020886supp007.pdf [file bmjopen-2017-020886supp007.pdf]

Supplementary file 7. Table of study-level characteristics and results for welfare state

| Serial number                       | Authors, publication year | Years of study | Level of analysis | Assessment of economic factors | Setting                                    | Political exposures  | Population health outcomes                           | Result category |
|-------------------------------------|---------------------------|----------------|-------------------|--------------------------------|--------------------------------------------|----------------------|------------------------------------------------------|-----------------|
| <b>Studies from the 2010 review</b> |                           |                |                   |                                |                                            |                      |                                                      |                 |
| 1                                   | Avendano et al, 2009      | 2004-2007      | Ecological        | Yes                            | 11 countries from 3 European regions       | Welfare regimes      | Chronic conditions, self-reported health, depression | Positive        |
| 2                                   | Bambra, 2005              | 1997-1999      | Ecological        | No                             | 18 OECD countries                          | Welfare regimes      | Health care index                                    | Positive        |
| 3                                   | Bambra, 2006              | 1980-1998      | Ecological        | No                             | 18 OECD countries                          | Welfare regimes      | Infant mortality                                     | Positive        |
| 4                                   | Bambra and Eikemo, 2009   | 2002-2004      | Individual        | No                             | 37,499 persons from 21 European countries  | Welfare regimes      | Self-reported health, long-standing illness          | Positive        |
| 5                                   | Bambra et al, 2009        | 1998-2004      | Individual        | No                             | 118,245 persons from 13 European countries | Welfare regimes      | Self-rated health                                    | Inconclusive    |
| 6                                   | Burstrom et al, 2010      | 1999-2001      | Individual        | Yes                            | 28,485 persons from                        | Family policy models | Self-rated health, limiting long-                    | Positive        |

|    |                           |           |            |     |                                            |                                         |                                                                      |              |
|----|---------------------------|-----------|------------|-----|--------------------------------------------|-----------------------------------------|----------------------------------------------------------------------|--------------|
|    |                           |           |            |     | Italy, Sweden and Britain                  |                                         | standing illness                                                     |              |
| 7  | Chung and Muntaner, 2006  | 1960-1994 | Ecological | Yes | 19 wealthy OECD countries                  | Public sector medical care              | Infant mortality rate, low birth weight, under-five mortality weight | Positive     |
| 8  | Chung and Muntaner, 2007  | 1960-1998 | Ecological | Yes | 18 wealthy countries                       | Welfare regimes                         | Infant mortality rate, low birth weight                              | Positive     |
| 9  | Conley and Springer, 2001 | 1960-1992 | Ecological | Yes | 19 OECD countries                          | Welfare regimes, welfare state spending | Infant mortality                                                     | Positive     |
| 10 | Dahl et al, 2006          | 1970-2005 | Ecological | Yes | Up to 11 European countries                | Welfare regimes                         | Absolute and relative health inequalities                            | Inconclusive |
| 11 | Eikemo et al, 2008        | 2002-2004 | Individual | No  | 69, 821 persons from 23 European countries | Welfare regimes                         | Self-reported health, limiting longstanding illness                  | Inconclusive |
| 12 | Eikemo et al, 2008        | 2002-2004 | Individual | No  | 65, 065 persons from 21 European countries | Welfare regimes                         | Subjective poor health, limiting longstanding illness                | Positive     |
| 13 | Elola et al, 1995         | 1990-1991 | Ecological | Yes | 17 Western European countries              | Health care system                      | Infant mortality, life expectancy                                    | Positive     |

|    |                           |           |            |     |                                                             |                           |                                                                |              |
|----|---------------------------|-----------|------------|-----|-------------------------------------------------------------|---------------------------|----------------------------------------------------------------|--------------|
| 14 | Farfan-Portet et al, 2010 | 2001      | Individual | No  | 5,729,859 persons in Belgium and Britain                    | Welfare regimes           | Self-reported health                                           | Inconclusive |
| 15 | Fayissa, 2001             | 1993      | Ecological | Yes | 34 sub-Saharan African countries                            | Public health expenditure | Infant mortality, child mortality                              | Positive     |
| 16 | Grosse et al, 2010        | 2004      | Individual | No  | 38,122 persons from 24 European countries                   | Welfare regimes           | Perception of need for seeking primary health care             | Positive     |
| 17 | Karim, 2010               | 2003      | Ecological | Yes | 30 countries in Europe, North America, Australia and Asia   | Welfare regimes           | Infant mortality, life expectancy                              | Positive     |
| 18 | Klomp and de Haan, 2008   | 2000-2005 | Ecological | Yes | 101 low, middle and high income countries                   | Governance                | 19 mortality, disease, sickness indicators                     | Positive     |
| 19 | Lahelma and Arber, 1994   | 1985-1987 | Individual | No  | Ca. 30,000 persons from Britain, Finland, Norway and Sweden | Welfare regimes           | Limiting long-standing illness                                 | Negative     |
| 20 | Lundberg et al, 2008      | 1950-2000 | Ecological | Yes | 18 OECD countries                                           | Family policy models      | Infant mortality, mortality among those aged 30-59 and over 65 | Positive     |

|    |                          |           |            |     |                                                                 |                           |                                                                                              |              |
|----|--------------------------|-----------|------------|-----|-----------------------------------------------------------------|---------------------------|----------------------------------------------------------------------------------------------|--------------|
| 21 | Menon-Johansson, 2005    | 2002      | Ecological | Yes | 149 countries                                                   | Governance                | HIV prevalence                                                                               | Positive     |
| 22 | Muntaner et al, 2006     | 1980-1995 | Individual | Yes | Sweden, Italy, and England and Wales (combined)                 | Welfare regimes           | Mortality level per occupational class, population attributable risk, index of dissimilarity | Inconclusive |
| 23 | Nordenmark et al, 2006   | 1992-2001 | Individual | Yes | 3442 persons from Sweden, Ireland and Great Britain             | Unemployment benefit type | Psychological distress                                                                       | Positive     |
| 24 | Ouweneel, 2002           | 1980-1990 | Ecological | Yes | 42 'first-world, second-world and third-world' countries        | Social security system    | Self-rated health                                                                            | Inconclusive |
| 25 | Raphael and Bryant, 2004 | 1999      | Ecological | Yes | 5 countries (Canada, Denmark, Sweden, UK, US)                   | Welfare state spending    | Life expectancy                                                                              | Positive     |
| 26 | Rostila, 2007            | 2002-2003 | Individual | Yes | 36,489 persons in 20 European countries                         | Welfare regimes           | Self-rated health, life expectancy                                                           | Positive     |
| 27 | Sanders et al, 2009      | 1998-2002 | Individual | Yes | 12,888 persons in 4 countries (UK, Finland, Germany, Australia) | Welfare regimes           | Oral health                                                                                  | Positive     |

|                                |                              |           |            |     |                                                                |                           |                                                                          |              |
|--------------------------------|------------------------------|-----------|------------|-----|----------------------------------------------------------------|---------------------------|--------------------------------------------------------------------------|--------------|
| 28                             | Sekine et al, 2009           | 1991-2003 | Individual | No  | 17,801 persons in Britain, Finland and Japan                   | Welfare regimes           | The Short-Form 36: physical and mental health functioning                | Positive     |
| 29                             | Veenhoven and Ouweneel, 1995 | 1965-1985 | Ecological | Yes | Up to 97 rich and poor countries                               | Welfare state expenditure | Life expectancy                                                          | Positive     |
| 30                             | Veenhoven, 2000              | 1980-1990 | Ecological | Yes | 40 countries                                                   | Welfare state expenditure | Life expectancy, self-rated health                                       | Inconclusive |
| 31                             | Whitehead et al, 2000        | 1979-1996 | Individual | No  | 80,792 persons from Britain and Sweden                         | Social benefit system     | Self-perceived health, limiting longstanding illness                     | Inconclusive |
| 32                             | Zambon et al, 2006           | 2001-2002 | Individual | Yes | 160, 325 persons from 32 European and North American countries | Welfare regimes           | Self-reported health, well-being, health symptom load, health behaviours | Positive     |
| <b>Studies from our update</b> |                              |           |            |     |                                                                |                           |                                                                          |              |
| 33                             | Ades et al, 2013             | 2008-2012 | Ecological | Yes | 27 European Union countries                                    | Healthcare spending       | Cancer incidence and mortality                                           | Positive     |
| 34                             | Akinci et al, 2014           | 1990-2010 | Ecological | Yes | 19 Middle Eastern and North African countries                  | Healthcare spending       | Infant, under-5, and maternal mortality                                  | Positive     |

|    |                       |            |            |     |                                                    |                                                                                                  |                                                                                  |              |
|----|-----------------------|------------|------------|-----|----------------------------------------------------|--------------------------------------------------------------------------------------------------|----------------------------------------------------------------------------------|--------------|
| 35 | Bambra et al, 2014    | 2010       | Individual | Yes | 21,705 men and women from 27 European countries    | Welfare regime                                                                                   | Self-rated health                                                                | Inconclusive |
| 36 | Batniji et al, 2014   | 1980-2011  | Ecological | Yes | 22 Arab countries                                  | Governance                                                                                       | Mortality                                                                        | Positive     |
| 37 | Bentley et al, 2016   | 2001-2008  | Ecological | Yes | Australia and UK                                   | Housing benefit generosity                                                                       | Mental health                                                                    | Positive     |
| 38 | Bradley et al, 2011   | 2009       | Ecological | Yes | 30 OECD countries                                  | Healthcare spending, social care spending                                                        | Life expectancy, low birth weight, maternal mortality, potential life years lost | Positive     |
| 39 | Brandt and Hank, 2014 | Up to 2009 | Individual | No  | More than 13,000 people from 11 European countries | Welfare regimes                                                                                  | Self-rated health, job loss                                                      | Positive     |
| 40 | Bremberg, 2016        | 1990-2012  | Ecological | Yes | 28 OECD countries                                  | Family benefit spending, healthcare spending, government expenditure on research and development | Infant mortality                                                                 | Inconclusive |
| 41 | Copeland et al, 2015  | 1991-2010  | Individual | Yes | England (n = 217,514) and Sweden (n = 184, 428)    | Welfare regimes                                                                                  | Self-rated health, health inequalities                                           | Positive     |

|    |                             |           |            |     |                                                       |                                                             |                                                                                                  |          |
|----|-----------------------------|-----------|------------|-----|-------------------------------------------------------|-------------------------------------------------------------|--------------------------------------------------------------------------------------------------|----------|
| 42 | Corsi and Subramanian, 2014 | 1990-2012 | Ecological | Yes | 35 sub-Saharan African countries                      | Maternal and child health service coverage                  | Under-5 mortality                                                                                | Positive |
| 43 | Craveiro, 2017              | 2010-2011 | Individual | Yes | 53,615 individuals from 15 European countries         | Welfare regimes                                             | Composite health measure derived from 3 indicators based on factor analysis, health inequalities | Positive |
| 44 | Dahl and van der Wel, 2013  | 2005      | Individual | Yes | Around 245,000 individuals from 18 European countries | National social expenditure                                 | Self-rated health, health inequalities                                                           | Positive |
| 45 | Deeming and Hayes, 2012     | 2000-2005 | Individual | Yes | Just under 30,000 individuals from OECD countries     | Welfare regimes                                             | Unhappiness                                                                                      | Positive |
| 46 | Devaux, 2015                | 2006-2009 | Individual | Yes | Participants from 18 OECD countries                   | Health care system                                          | Health inequalities                                                                              | Positive |
| 47 | Dragano et al, 2010         | 2004-2006 | Individual | Yes | 9917 older individuals from 12 European countries     | Welfare regimes, indicators from the EU Labour Force Survey | Depression (EURO-D and CES-D)                                                                    | Positive |

|    |                            |           |            |     |                                                       |                                                                                                     |                             |              |
|----|----------------------------|-----------|------------|-----|-------------------------------------------------------|-----------------------------------------------------------------------------------------------------|-----------------------------|--------------|
| 48 | Dujardin et al, 2011       | 2001      | Individual | Yes | 5729858 individuals from Belgium and Great Britain    | Home care policy system                                                                             | Health burden of care       | Positive     |
| 49 | Elgar et al, 2011          | 2006      | Individual | Yes | 48641 adults from 33 rich and middle-income countries | Healthcare spending                                                                                 | Homicide                    | Inconclusive |
| 50 | Engster and Stensöta, 2011 | 1995-2005 | Individual | Yes | Participants from 20 OECD countries                   | Family policy regime: family cash and tax benefits, paid parenting leave, public child care support | Child poverty and mortality | Positive     |
| 51 | Esmaeli et al, 2011        | 1996-2004 | Ecological | Yes | 24 Islamic countries                                  | Healthcare spending                                                                                 | Life expectancy             | Inconclusive |
| 52 | Esser and Palme, 2010      | 2002-2005 | Individual | Yes | 13 OECD countries                                     | Pension system                                                                                      | Self-rated health, WHO-5    | Positive     |
| 53 | Foubert et al, 2014        | 2002-2004 | Individual | Yes | 213764 individuals from 57 countries                  | Welfare regimes                                                                                     | Self-rated health           | Positive     |
| 54 | Fritzell et al, 2012       | 2000-2005 | Individual | No  | Randomly sampled British, Italian and Swedish mothers | Family policy model                                                                                 | Maternal health             | Negative     |
| 55 | Fritzell et al, 2013       | 1980-2005 | Ecological | Yes | Up to 25 countries per wave                           | Welfare regimes                                                                                     | Mortality                   | Positive     |



|    |                              |           |            |     |                                                    |                                               |                                                 |              |
|----|------------------------------|-----------|------------|-----|----------------------------------------------------|-----------------------------------------------|-------------------------------------------------|--------------|
| 56 | Gesthuizen et al, 2012       | 2002-2008 | Individual | Yes | Over 90,000 individuals from 32 European countries | Healthcare spending, modernised labour market | Self-rated health                               | Positive     |
| 57 | Gilligan and Skrepnek, 2015  | 1995-2010 | Ecological | Yes | 21 Eastern Mediterranean countries                 | Healthcare spending                           | Life expectancy                                 | Positive     |
| 58 | Glass et al, 2016            | 2006-2008 | Individual | Yes | 22 OECD countries                                  | Family policy                                 | Happiness                                       | Positive     |
| 59 | Granados, 2010               | 1950-2000 | Ecological | Yes | 8 European countries                               | Welfare regimes                               | Life expectancy, mortality, tobacco consumption | Inconclusive |
| 60 | Guarnizo-Herreño et al, 2013 | 2009      | Ecological | No  | 31 European countries                              | Welfare regimes                               | Oral health                                     | Positive     |
| 61 | Harding et al, 2013          | 1971-2006 | Ecological | No  | England and Wales, Italy and Finland               | Welfare regimes                               | Elder mortality                                 | Negative     |
| 62 | Hájek et al, 2012            | 1995-2008 | Ecological | Yes | 27 European Union countries                        | Healthcare spending                           | Life expectancy, standardised death rate        | Positive     |
| 63 | Hauck et al, 2016            | 1990-2012 | Ecological | Yes | 54 low-income studies                              | Healthcare spending                           | Life expectancy                                 | Inconclusive |
| 64 | Heijink et al, 2013          | 1996-2006 | Ecological | Yes | 14 Western countries                               | Healthcare spending                           | Avoidable mortality                             | Positive     |
| 65 | Hoffman, 2011                | 1980-2006 | Ecological | Yes | USA and Denmark                                    | Welfare system                                | Old-age mortality                               | Negative     |
| 66 | Kuovo and Räsänen, 2015      | 2010      | Individual | No  | 10,046 individuals from Finland, Britain,          | Welfare system                                | Subjective well-being                           | Positive     |

|    |                                       |           |            |     |                                                       |                                                   |                                           |              |
|----|---------------------------------------|-----------|------------|-----|-------------------------------------------------------|---------------------------------------------------|-------------------------------------------|--------------|
|    |                                       |           |            |     | Germany and Greece                                    |                                                   |                                           |              |
| 67 | Levecque et al, 2011                  | 2006-2007 | Individual | Yes | 41686 people from 23 European countries               | Welfare regimes, welfare state generosity         | Depression (CES-D)                        | Positive     |
| 68 | Levecque et al, 2015                  | 2006-2007 | Individual | No  | 37076 people from 20 European countries               | Migrant integration social policy                 | Depression (CES-D)                        | Inconclusive |
| 69 | Lin et al, 2014                       | 1996-2010 | Ecological | Yes | 149 countries                                         | Governance                                        | Child mortality                           | Positive     |
| 70 | López-Casasnovas and Soley-Bori, 2014 | 1980-2010 | Ecological | Yes | 32 OECD countries                                     | Healthcare and social spending, healthcare system | Health Human Development Index            | Positive     |
| 71 | McKinnon et al, 2016                  | 2006-2012 | Individual | Yes | Participants from 48 low- and middle-income countries | Maternal health service coverage                  | Neonatal mortality, health inequality     | Positive     |
| 72 | Maynard, 2016                         | 1985-2005 | Ecological | Yes | 74 developing countries                               | Healthcare spending                               | Tuberculosis mortality                    | Positive     |
| 73 | Miething et al, 2013                  | 2000      | Individual | Yes | 19353 individuals from Sweden, East and West Germany  | Welfare regimes                                   | Self-rated health                         | Inconclusive |
| 74 | Minagawa, 2013                        | 1990-2009 | Ecological | Yes | 23 Eastern European countries                         | Healthcare spending                               | Age-specific mortality, self-rated health | Positive     |

|    |                           |           |                            |     |                                               |                                                              |                                                              |          |
|----|---------------------------|-----------|----------------------------|-----|-----------------------------------------------|--------------------------------------------------------------|--------------------------------------------------------------|----------|
| 75 | Moor et al, 2013          | 1981-1999 | Ecological                 | Yes | 47 European countries and regions             | Welfare state generosity (Social Policy Indicators Database) | Life satisfaction                                            | Positive |
| 76 | Muldoon et al, 2011       | 2001-2008 | Ecological                 | No  | 136 United Nations countries                  | Healthcare spending                                          | Infant, child and maternal mortality                         | Positive |
| 77 | Muntaner et al, 2017      | 2003-2010 | Household-level ecological | Yes | 27 European Union countries                   | Welfare regimes                                              | Self-rated health, chronic conditions                        | Positive |
| 78 | Nelson and Fritzell, 2014 | 1990-2009 | Ecological                 | Yes | 18 countries                                  | Minimum income benefits                                      | Mortality (life expectancy and age-standardised death rates) | Positive |
| 79 | Novignon et al, 2012      | 1995-2010 | Ecological                 | Yes | 44 Sub-Saharan African countries              | Healthcare spending                                          | Life expectancy, death rate, infant mortality                | Positive |
| 80 | Olafsdottir, 2007         | 1998      | Individual                 | Yes | Participants from USA and Iceland             | Welfare regimes, healthcare spending                         | Self-rated physical health, health inequality                | Positive |
| 81 | Olsen and Dahl, 2007      | 2003      | Individual                 | Yes | 38,472 individuals from 21 European countries | Healthcare spending                                          | Self-rated health                                            | Positive |
| 82 | Palència et al, 2014      | 2010      | Individual                 | Yes | 23782 men and 28655 women from                | Gender equality policies                                     | Health inequality                                            | Positive |

|    |                             |           |            |     |                                         |                                                           |                                      |              |
|----|-----------------------------|-----------|------------|-----|-----------------------------------------|-----------------------------------------------------------|--------------------------------------|--------------|
|    |                             |           |            |     | 26 European countries                   |                                                           |                                      |              |
| 83 | Pickett and Wilkinson, 2007 | 1998-2006 | Ecological | Yes | 23 rich countries                       | Income equality                                           | Child wellbeing                      | Positive     |
| 84 | Pinzón-Flórez et al, 2015   | 2000-2010 | Ecological | Yes | 154 countries                           | Healthcare spending                                       | Child and maternal mortality         | Positive     |
| 85 | Platts, 2015                | 2000-2007 | Ecological | Yes | UK and Russia                           | Welfare regimes                                           | Self-rated health                    | Inconclusive |
| 86 | Ploubidis et al, 2012       | 2006-2007 | Individual | Yes | 33528 people from 14 European countries | Welfare regimes, income equality                          | Health in later life                 | Positive     |
| 87 | Popham et al, 2013          | 2006      | Ecological | No  | 37 countries                            | Welfare regimes                                           | Life expectancy                      | Positive     |
| 88 | Reeves et al, 2014          | 1995-2012 | Ecological | Yes | 21 European countries                   | Healthcare spending, social spending, pension expenditure | Tuberculosis control                 | Positive     |
| 89 | Richter et al, 2012         | 2006      | Individual | Yes | 141091 adolescents from 32 countries    | Welfare regimes                                           | Subjective health, health inequality | Positive     |
| 90 | Rovny, 2011                 | 1990-1999 | Ecological | Yes | 17 OECD countries                       | Family social policy                                      | Fertility                            | Positive     |
| 91 | Sacker et al, 2011          | 1995-2001 | Ecological | Yes | Britain, Germany, Denmark and USA       | Welfare regimes                                           | Self-rated health                    | Positive     |
| 92 | Sarti et al, 2013           | 2005      | Individual | Yes | Participants from                       | Welfare regimes                                           | Self-rated health, health inequality | Positive     |

|    |                            |            |            |     |                                                |                                                                                                       |                                                       |              |
|----|----------------------------|------------|------------|-----|------------------------------------------------|-------------------------------------------------------------------------------------------------------|-------------------------------------------------------|--------------|
|    |                            |            |            |     | European countries                             |                                                                                                       |                                                       |              |
| 93 | Shim, 2015                 | 1980-2010  | Ecological | Yes | 19 OECD countries                              | Social welfare expenditure                                                                            | Infant mortality                                      | Inconclusive |
| 94 | Stavrova et al, 2011       | 1999-2009  | Individual | Yes | Participants from 28 OECD countries            | Unemployment benefit policies                                                                         | Wellbeing among the unemployed                        | Inconclusive |
| 95 | Stuckler et al, 2010       | 1980-2005  | Ecological | Yes | Up to 18 European Union countries              | Social welfare spending                                                                               | All-cause mortality, cause-specific mortality         | Positive     |
| 96 | Van der Heuvel et al, 2013 | 1950-2000  | Ecological | Yes | Sweden, Netherlands, Canada, USA, Cuba         | Welfare regimes, Redistributive welfare policy                                                        | Infant mortality, low birth weight, under 5 mortality | Positive     |
| 97 | Van der Wel et al, 2011    | 2005       | Ecological | Yes | 26 European countries                          | Income equality, spending on active labour market policies, benefit generosity, employment protection | Social inequality in sickness                         | Positive     |
| 98 | Van Tuyckom, 2011          | Up to 2008 | Individual | Yes | 24,846 people from 27 European Union countries | Healthcare spending                                                                                   | Physical activity                                     | Positive     |

|     |                            |      |            |     |                                                           |                                                                   |                                        |              |
|-----|----------------------------|------|------------|-----|-----------------------------------------------------------|-------------------------------------------------------------------|----------------------------------------|--------------|
| 99  | Vahid Shahidi et al, 2016  | 2012 | Individual | Yes | 22123 individuals from 23 countries with a welfare state  | Welfare social policy                                             | Self-rated health of the unemployed    | Positive     |
| 100 | Vöörmann and Helemäe, 2013 | 2010 | Individual | Yes | 5480 individuals from 4 Eastern European countries        | Welfare regimes                                                   | Self-rated health, health inequalities | Inconclusive |
| 101 | Wu and Chiang, 2007        | 2002 | Ecological | Yes | Taiwan and 21 comparison industrialized countries         | Income inequality, healthcare spending, public social expenditure | Child mortality, under-five mortality  | Positive     |
| 102 | York and Bell, 2014        | 2005 | Ecological | Yes | Countries from the World Bank database with relevant data | Healthcare spending, gender equality policies                     | Self-reported life satisfaction (0-10) | Positive     |
