# Supplementary material for: How much evidence is there that political factors are related to population health outcomes? An internationally comparative systematic review
Source: PubMed Central journal article supplement — BMJ Open. 2018 Oct 18;8(10):e020886. doi: 10.1136/bmjopen-2017-020886 (PMC6196855; doi:10.1136/bmjopen-2017-020886), 2018-10-18
Supplement: bmjopen-2017-020886supp008.pdf [file bmjopen-2017-020886supp008.pdf]

Supplementary file 8. Table of study-level characteristics and results for political tradition

| Serial number                       | Authors, publication year   | Years of study | Level of analysis | Assessment of economic factors | Setting                                                 | Political exposures                                      | Population health outcomes                               | Result category |
|-------------------------------------|-----------------------------|----------------|-------------------|--------------------------------|---------------------------------------------------------|----------------------------------------------------------|----------------------------------------------------------|-----------------|
| <b>Studies from the 2010 review</b> |                             |                |                   |                                |                                                         |                                                          |                                                          |                 |
| 1                                   | Borrell et al, 2009         | 2000           | Individual        | Yes                            | 196,280 persons from 13 European countries              | Political tradition classification                       | Self-rated health                                        | Positive        |
| 2                                   | Cereseto and Waitzkin, 1986 | 1983-1984      | Ecological        | Yes                            | 123 countries, grouped by level of economic development | Political-economic system                                | Physical quality of life index                           | Positive        |
| 3                                   | Chung and Muntaner, 2006    | 1960-1994      | Ecological        | Yes                            | 19 OECD countries                                       | Voter partisanship                                       | Low birth weight, infant mortality, under-five mortality | Positive        |
| 4                                   | Correa and Namkoong, 1992   | 1980           | Ecological        | Yes                            | 116 countries with a population over 1 million          | Political conditions; political tradition classification | Life expectancy, mortality                               | Positive        |

|    |                           |           |            |     |                                                |                                                                             |                                                                                             |          |
|----|---------------------------|-----------|------------|-----|------------------------------------------------|-----------------------------------------------------------------------------|---------------------------------------------------------------------------------------------|----------|
| 5  | Espelt et al, 2008        | 2004      | Individual | Yes | 16,901 persons in 9 European countries         | Political tradition classification                                          | Self-reported health, long-term illness                                                     | Positive |
| 6  | Lena and London, 1993     | 1983      | Ecological | Yes | Up to 84 peripheral and non-core nations       | Political tradition classification                                          | Infant mortality, child mortality, life expectancy                                          | Positive |
| 7  | London and Williams, 1990 | 1965-1970 | Ecological | Yes | Up to 110 periphery and semi-periphery nations | Political tradition classification                                          | Infant mortality, life expectancy                                                           | Positive |
| 8  | Moon and Dixon, 1985      | 1970-1975 | Ecological | Yes | 116 nations                                    | Political ideology (left, right, centre)                                    | Physical Quality of Life Index: life expectancy, infant mortality                           | Positive |
| 9  | Muntaner et al, 2002      | 1989-1992 | Ecological | Yes | 16 wealthy countries                           | Working class power, voter partisanship, time in power by different parties | Life expectancy, self-rated health, low birth weight, and age- and cause-specific mortality | Positive |
| 10 | Navarro et al, 2003       | 1950-1998 | Ecological | Yes | 17 OECD countries                              | Working class power, voter partisanship                                     | Infant mortality, life expectancy, health inequalities                                      | Positive |
| 11 | Navarro and Shi, 2001     | 1960-1996 | Ecological | Yes | 18 OECD countries                              | Political tradition classification,                                         | Infant mortality,                                                                           | Positive |

|                                |                            |           |            |     |                                  |                                                                                      |                                                   |              |
|--------------------------------|----------------------------|-----------|------------|-----|----------------------------------|--------------------------------------------------------------------------------------|---------------------------------------------------|--------------|
|                                |                            |           |            |     |                                  | working class power                                                                  | health inequalities                               |              |
| 12                             | Navarro et al, 2006        | 1972-1996 | Ecological | Yes | 17 OECD countries                | Voter partisanship, time in power by different parties                               | Infant mortality, life expectancy                 | Positive     |
| <b>Studies from our update</b> |                            |           |            |     |                                  |                                                                                      |                                                   |              |
| 13                             | Bosdriesz et al, 2015      | 1996-2010 | Ecological | Yes | 11 European Union countries      | Percentage of seats held by social democratic, socialist and other left-wing parties | Tobacco Control Scale                             | Positive     |
| 14                             | Granados, 2010             | 1950-2000 | Ecological | Yes | 8 European countries             | Political tradition classification                                                   | Life expectancy, mortality, tobacco consumption   | Inconclusive |
| 15                             | Huijts et al, 2010         | 2002-2006 | Individual | Yes | 29 European countries and Israel | Political tradition classification                                                   | Self-rated health                                 | Positive     |
| 16                             | Lin et al, 2012            | 1970-2004 | Ecological | Yes | 119 less developed countries     | Political regime score from Polity IV                                                | Life expectancy                                   | Positive     |
| 17                             | Mackenbach and McKee, 2013 | 1990-2009 | Ecological | Yes | 43 European countries            | Left-wing participation in government (share of seats)                               | Success in implementing effective health policies | Inconclusive |
