# Supplementary material for: How much evidence is there that political factors are related to population health outcomes? An internationally comparative systematic review
Source: PubMed Central journal article supplement — BMJ Open. 2018 Oct 18;8(10):e020886. doi: 10.1136/bmjopen-2017-020886 (PMC6196855; doi:10.1136/bmjopen-2017-020886), 2018-10-18
Supplement: bmjopen-2017-020886supp009.pdf [file bmjopen-2017-020886supp009.pdf]

Supplementary file 9. Table of study-level characteristics and results for democracy

| Serial number                   | Authors, publication year  | Years of study | Level of analysis | Setting                                        | Assessment of economic factors | Political exposures                               | Population health outcomes                                                      | Result category |
|---------------------------------|----------------------------|----------------|-------------------|------------------------------------------------|--------------------------------|---------------------------------------------------|---------------------------------------------------------------------------------|-----------------|
| <b>Studies from 2010 review</b> |                            |                |                   |                                                |                                |                                                   |                                                                                 |                 |
| 1                               | Adeyi, 1997                | 1989-1993      | Ecological        | 10 former Communist countries                  | No                             | Transition from Communism to capitalist democracy | Life expectancy, infant mortality, probability of dying between 15 and 65 years | Negative        |
| 2                               | Alvarez-Dardet, 2006       | 2000           | Ecological        | 23 former Communist countries                  | Yes                            | Democratic deficit                                | Life expectancy, infant mortality, maternal mortality                           | Positive        |
| 3                               | Baum and Lake, 2003        | 1967-1997      | Ecological        | 128 poor and non-poor countries                | Yes                            | Democracy (Polity III)                            | Female life expectancy                                                          | Positive        |
| 4                               | Besley and Kudamatsu, 2006 | 1962-2002      | Ecological        | Up to 160 countries transitioning to democracy | Yes                            | Democracy (Polity IV)                             | Life expectancy, infant mortality                                               | Positive        |

|    |                            |           |            |                                                           |     |                                                        |                                                                 |              |
|----|----------------------------|-----------|------------|-----------------------------------------------------------|-----|--------------------------------------------------------|-----------------------------------------------------------------|--------------|
| 5  | Franco, 2004               | 1998      | Ecological | 170 high, medium and low-income countries                 | Yes | Democracy (Freedom House)                              | Life expectancy, infant mortality, maternal mortality           | Positive     |
| 6  | Frey and Al-Roumi, 1999    | 1970-1990 | Ecological | 87 developed and less-developed countries                 | No  | Democracy (political rights index and civil liberties) | Infant mortality, life expectancy                               | Positive     |
| 7  | Gauri and Khaleghian, 2002 | 1989-1997 | Ecological | 208 low and middle-income countries                       | Yes | Democracy (Polity IV)                                  | Vaccine coverage for diphtheria, tetanus, pertussis and measles | Negative     |
| 8  | Ghobareh et al, 2004       | 2000      | Ecological | 179 countries in WHO                                      | Yes | Democracy (Polity IV, Freedom House)                   | Health-adjusted life expectancy                                 | Positive     |
| 9  | Gizeles, 2009              | 1982-2000 | Ecological | 117 developed and developing countries                    | Yes | Democracy (Polity IV), state capacity                  | AIDS infection rate                                             | Positive     |
| 10 | Houweling et al, 2005      | 1999      | Ecological | 43 developing countries in Asia, Africa and Latin America | Yes | Democracy (political rights index)                     | Under five mortality rate                                       | Inconclusive |
| 11 | Kick et al, 1990           | 1970-1985 | Ecological | 63 developing countries                                   | Yes | Political democracy (political rights index)           | Infant mortality                                                | Positive     |

|    |                           |           |            |                                                      |     |                                                                                               |                                                                   |              |
|----|---------------------------|-----------|------------|------------------------------------------------------|-----|-----------------------------------------------------------------------------------------------|-------------------------------------------------------------------|--------------|
| 12 | Klomp and de Haan, 2009   | 2000-2005 | Ecological | 171 countries with a population greater than 200,000 | Yes | Decree of democracy, political stability                                                      | 19 national health indicators                                     | Positive     |
| 13 | Lake and Baum, 2001       | 1970-1992 | Ecological | Up to 110 developed countries                        | No  | Democracy (Polity III)                                                                        | Life expectancy, infant mortality                                 | Positive     |
| 14 | Lena and London; 1993     | 1983      | Ecological | Up to 84 peripheral and non-core nations             | Yes | Level of democracy                                                                            | Infant mortality, child mortality, life expectancy                | Positive     |
| 15 | London and Williams; 1990 | 1965-1970 | Ecological | Up to 110 periphery and semi-periphery nations       | Yes | Level of political democracy                                                                  | Infant mortality, life expectancy                                 | Positive     |
| 16 | Moon and Dixon, 1985      | 1970-1975 | Ecological | 116 nations                                          | Yes | Level of political democracy, political stability                                             | Physical Quality of Life Index: life expectancy, infant mortality | Positive     |
| 17 | Navia and Zweifel, 2003   | 1990-1997 | Ecological | 188 democratic or dictatorial countries              | Yes | Democracy (yes or no, based on presence of elections)                                         | Fertility, child survival                                         | Positive     |
| 18 | Pillai and Gupta, 2006    | 2001      | Ecological | 129 developing countries                             | No  | Democracy (human rights rating, political rights, and civil liberty, political terror scales) | 10 global monitoring indicators of women's reproductive health    | Positive     |
| 19 | Ross, 2006                | 1970-2000 | Ecological | 168 countries with a population                      | Yes | Democracy (Polity IV), years of                                                               | Child mortality, infant mortality                                 | Inconclusive |

|    |                         |           |            |                                                     |     |                                                    |                                                                               |              |
|----|-------------------------|-----------|------------|-----------------------------------------------------|-----|----------------------------------------------------|-------------------------------------------------------------------------------|--------------|
|    |                         |           |            | greater than 200,000                                |     | democracy since 1900                               |                                                                               |              |
| 20 | Rudra and Haggard, 2005 | 1975-1997 | Ecological | 57 less developed countries                         | Yes | Democracy (Polity IV)                              | Infant mortality                                                              | Positive     |
| 21 | Safaei, 2006            | 2003      | Ecological | 118 autocratic, incoherent and democratic countries | Yes | Democracy (Polity IV)                              | Life expectancy, mortality rate, child mortality rate                         | Positive     |
| 22 | Shandra et al, 2004     | 1980-1997 | Ecological | 59 developing countries                             | Yes | Level of political democracy                       | Infant mortality                                                              | Positive     |
| 23 | Shandra et al, 2010     | 1990-2005 | Ecological | 74 low income countries                             | Yes | Democracy (Polity IV)                              | Infant mortality                                                              | Positive     |
| 24 | Stroup, 2007            | 1980-2000 | Ecological | Up to 105 countries                                 | Yes | Political Rights Index (Freedom House)             | Life expectancy, child mortality                                              | Positive     |
| 25 | Tsai, 2006              | 1975-1998 | Ecological | 119 developing countries                            | Yes | Democracy (majority rule and political contention) | Life expectancy, infant mortality under one year, infant mortality under five | Inconclusive |
| 26 | Wejnert, 2008           | 1970-2005 | Ecological | 58 core and peripheral countries                    | Yes | Democracy (Polity IV)                              | Maternal care, fertility rate, maternal mortality, women life expectancy      | Inconclusive |
| 27 | Zweifel and Navia, 2000 | 1950-1990 | Ecological | 138 democratic or                                   | Yes | Democracy (yes or no, defined)                     | Infant mortality                                                              | Positive     |

|                                |                             |               |            |                                                 |     |                                              |                                        |              |
|--------------------------------|-----------------------------|---------------|------------|-------------------------------------------------|-----|----------------------------------------------|----------------------------------------|--------------|
|                                |                             |               |            | dictatorial countries                           |     | by presence of elections)                    |                                        |              |
| <b>Studies from our update</b> |                             |               |            |                                                 |     |                                              |                                        |              |
| 28                             | Batniji et al, 2014         | 1980-2011     | Ecological | 22 Arab countries                               | Yes | Extent of democracy                          | Mortality                              | Inconclusive |
| 29                             | Burroway, 2016              | 1995-2008     | Individual | 52 developing countries                         | Yes | Democracy (Polity IV)                        | Child diarrhoea and malnutrition       | Inconclusive |
| 30                             | Chuang et al, 2013          | 1980-2009     | Ecological | 46 less-developed countries                     | Yes | Democracy (Polity IV)                        | Infant mortality                       | Positive     |
| 31                             | Chuang et al, 2013          | 1980-2009     | Ecological | 46 less-developed countries                     | Yes | Democracy (Polity IV)                        | Under-5 mortality                      | Inconclusive |
| 32                             | Dietrich and Bernhard, 2015 | 1980s to 2012 | Ecological | 88 countries that were not OECD members in 1984 | Yes | Democracy (Polity IV)                        | Infant mortality, basic nutrition      | Inconclusive |
| 33                             | Doherty and Kelly, 2010     | Not stated    | Individual | 30,816 individuals from 17 European countries   | Yes | Satisfaction with democracy on 0-10 scale    | Self-reported happiness on 0-10 scales | Positive     |
| 34                             | Fumagalli et al, 2013       | 1990-2007     | Ecological | 47 developing countries                         | Yes | Democracy (Polity IV), political competition | BMI                                    | Positive     |
| 35                             | Hauck et al, 2012           | 1990-2012     | Ecological | 54 low-income studies                           | Yes | Democracy (Polity IV)                        | Life expectancy                        | Positive     |
| 36                             | Klenk et al, 2016           | 1950-2010     | Ecological | 64 countries from WHO                           | Yes | Democratization                              | Mortality                              | Positive     |

|    |                            |                                  |                     |                                        |     |                                                                   |                                                   |          |
|----|----------------------------|----------------------------------|---------------------|----------------------------------------|-----|-------------------------------------------------------------------|---------------------------------------------------|----------|
|    |                            |                                  |                     | mortality database                     |     |                                                                   |                                                   |          |
| 37 | Krueger et al, 2015        | 2002-2004                        | Individual          | 313,554 individuals from 67 countries  | Yes | Democracy variable resulting from factor analysis of 7 indicators | Self-rated health                                 | Positive |
| 38 | Kudamatsu, 2012            | Up to 2004                       | Ecological          | Sub-Saharan African countries          | Yes | Democratization                                                   | Infant mortality                                  | Positive |
| 39 | Mackenbach, 2013           | 1900-2008                        | Ecological          | European countries                     | No  | Democracy (binary)                                                | Life expectancy                                   | Positive |
| 40 | Mackenbach et al, 2013     | 1960-2008                        | Ecological          | European countries                     | Yes | Democratization                                                   | Life expectancy                                   | Positive |
| 41 | Mackenbach and McKee, 2013 | 1990-2009                        | Ecological          | 43 European countries                  | Yes | Democracy (+10 to -10)                                            | Success in implementing effective health policies | Positive |
| 42 | Maynard, 2016              | 1985-2005                        | Ecological analysis | 74 developing countries                | Yes | Democracy (Freedom House)                                         | Tuberculosis mortality                            | Positive |
| 43 | Minagawa, 2013             | 1990-2009                        | Ecological analysis | 23 Eastern European countries          | Yes | Freedom (Freedom House, Heritage Foundation)                      | Age-specific mortality, self-rated health         | Positive |
| 44 | Witvliet et al, 2013       | From 2000, end date not reported | Individual          | 72524 adults from 20 African countries | Yes | Transparency and freedom from corruption                          | Self-rated health                                 | Positive |
