# Supplementary material for: How much evidence is there that political factors are related to population health outcomes? An internationally comparative systematic review
Source: PubMed Central journal article supplement — BMJ Open. 2018 Oct 18;8(10):e020886. doi: 10.1136/bmjopen-2017-020886 (PMC6196855; doi:10.1136/bmjopen-2017-020886), 2018-10-18
Supplement: bmjopen-2017-020886supp010.pdf [file bmjopen-2017-020886supp010.pdf]

**Supplementary file 10. Table of study-level characteristics and results for globalisation**

| <b>Serial number</b> | <b>Authors, publication year</b> | <b>Years of study</b> | <b>Level of analysis</b> | <b>Setting</b>                                   | <b>Political exposures</b>                                                                               | <b>Population health outcomes</b> | <b>Result category</b> |
|----------------------|----------------------------------|-----------------------|--------------------------|--------------------------------------------------|----------------------------------------------------------------------------------------------------------|-----------------------------------|------------------------|
| 1                    | Moore et al, 2006                | 2000                  | Ecological               | 128 countries divided into 6 world-system blocks | National trade, world-system role                                                                        | Infant mortality                  | Positive               |
| 2                    | Shandra et al, 2004              | 1980-1997             | Ecological               | 59 developing countries                          | Commodity concentration, multinational corporate penetration, international monetary fund conditionality | Infant mortality                  | Negative               |
| 3                    | Shen and Williamson, 2001        | 1965-1991             | Ecological               | 82 less developed countries                      | Foreign trade, foreign investment, debt increase                                                         | Infant mortality                  | Negative               |
| 4                    | Shen and Williamson, 1997        | 1960-1991             | Ecological               | 86 less developed countries                      | Foreign investment, debt dependency                                                                      | Child survival probability        | Negative               |

| <b>Studies from our update</b> |                                |            |            |                                             |                                                                                                                                       |                                    |              |
|--------------------------------|--------------------------------|------------|------------|---------------------------------------------|---------------------------------------------------------------------------------------------------------------------------------------|------------------------------------|--------------|
| 5                              | Bergh and Nilsson, 2010        | 1970-2005  | Ecological | 92 high-, middle- and low-income countries  | KOF index                                                                                                                             | Life expectancy                    | Positive     |
| 6                              | Bozorgmehr and Sebastian, 2014 | 1990-2010  | Ecological | 22 high-burden tuberculosis countries       | World Trade Organization membership status and duration, trade as a percentage of GDP, Economic Freedom of the World Index, KOF Index | Tuberculosis incidence             | Inconclusive |
| 7                              | Chuang et al, 2013             | 1980-2009  | Ecological | 46 less-developed countries                 | Debt, foreign investment                                                                                                              | Infant mortality                   | Inconclusive |
| 8                              | Chuang et al, 2013             | 1980-2009  | Ecological | 46 less-developed countries                 | Debt, foreign investment                                                                                                              | Under-5 mortality                  | Inconclusive |
| 9                              | Costa Font and Mas, 2016       | 1989-2005  | Ecological | 26 countries                                | KOF Index, CSGR Index                                                                                                                 | Obesity prevalence, caloric intake | Negative     |
| 10                             | Cross et al, 2009              | Not stated | Individual | UK, Spain, Kenya and Uganda                 | Localised or globalised food supply system                                                                                            | Health-related quality of life     | Positive     |
| 11                             | De Vogli et al, 2014           | 1980-2008  | Ecological | 127 low-, middle- and high-income countries | KOF Index                                                                                                                             | BMI                                | Negative     |

|    |                            |            |                            |                                   |                                                                                                                                       |                                                                                                                                                                                                                    |          |
|----|----------------------------|------------|----------------------------|-----------------------------------|---------------------------------------------------------------------------------------------------------------------------------------|--------------------------------------------------------------------------------------------------------------------------------------------------------------------------------------------------------------------|----------|
| 12 | Estimé et al, 2014         | 2005-2010  | Household-level ecological | Pacific nations                   | Food imports                                                                                                                          | Obesity                                                                                                                                                                                                            | Negative |
| 13 | Fan and Faioso Le'au, 2015 | Up to 2014 | Ecological                 | Independent and American Samoa    | Westernisation                                                                                                                        | Life expectancy, neonatal and child mortality, measles immunisation, diabetes mortality, cancer mortality, cerebrovascular disease mortality, heart disease mortality, pneumonia mortality, overweight and obesity | Negative |
| 14 | Gerring and Thacker, 2008  | 1960-1999  | Ecological                 | All countries with available data | Open international trade policies, low-inflation macroeconomic environments, market-oriented property rights, GATT and WTO membership | Infant mortality                                                                                                                                                                                                   | Positive |
| 15 | Goryakin et al, 2015       | 1991-2009  | Individual                 | Up to 887,00 women in 56          | KOF Index                                                                                                                             | Overweight and obesity                                                                                                                                                                                             | Negative |

|    |                          |            |            |                                           |                                                                           |                                                                                |              |
|----|--------------------------|------------|------------|-------------------------------------------|---------------------------------------------------------------------------|--------------------------------------------------------------------------------|--------------|
|    |                          |            |            | low- and middle-income countries          |                                                                           |                                                                                |              |
| 16 | Hauck et al, 2012        | 1990-2012  | Ecological | 54 low-income studies                     | Terms of international trade, foreign investment, debt service and relief | Life expectancy                                                                | Inconclusive |
| 17 | Jolly et al, 2013        | 2002       | Ecological | 27 Latin American and Caribbean countries | Net food import                                                           | Obesity                                                                        | Negative     |
| 18 | Jorgenson, 2009          | 1980-2000  | Ecological | Less-developed countries                  | Foreign direct investment                                                 | Water pollution                                                                | Negative     |
| 19 | Jorgenson, 2009          | 1980-2000  | Ecological | Less-developed countries                  | Foreign direct investment, export intensity                               | Water pollution                                                                | Negative     |
| 20 | Levine and Rothman, 2006 | Up to 1990 | Ecological | Up to 130 countries                       | Economic openness                                                         | Infant mortality, under-5 mortality, anthropometric measures of child stunting | Inconclusive |
| 21 | Martens et al, 2010      | Up to 2008 | Ecological | Global, subject to data availability      | Maastricht Globalization Index                                            | Infant mortality, under-5 mortality, adult mortality                           | Positive     |
| 22 | Maynard, 2015            | 2000-2010  | Ecological | Up to 85 low- and middle-                 | IGTA membership and status,                                               | Youth smoking rates (Global Youth Tobacco Survey)                              | Negative     |

|    |                               |            |            |                                  |                                               |                                                    |              |
|----|-------------------------------|------------|------------|----------------------------------|-----------------------------------------------|----------------------------------------------------|--------------|
|    |                               |            |            | income countries                 | trade, imports, exports                       |                                                    |              |
| 23 | Maynard, 2016                 | 1985-2005  | Ecological | 74 developing countries          | Debt, trade dependency                        | Tuberculosis mortality                             | Inconclusive |
| 24 | Milner et al, 2011            | 1980-2006  | Ecological | 35 countries                     | A globalisation index developed for the study | Suicide rate                                       | Negative     |
| 25 | Mukherjee and Kriekhaus, 2011 | 1970-2007  | Ecological | 132 countries                    | Economic, political and social globalisation  | Infant mortality, life expectancy, child mortality | Positive     |
| 26 | Oberlander et al, 2017        | 1970-2011  | Ecological | 70 countries                     | Social globalisation, trade openness          | Nutritional health                                 | Inconclusive |
| 27 | Oster, 2010                   | Up to 2007 | Ecological | UN countries with available data | Export activity                               | HIV                                                | Negative     |
| 28 | Owen and Wu, 2007             | 1960-1995  | Ecological | 219 countries                    | Openness to trade                             | Life expectancy, infant mortality                  | Positive     |
